# Supplementary material for: Structure and function of the mycobacterial transcription initiation complex with the essential regulator RbpA
Source: eLife. 2017 Jan 9;6:e22520. doi: 10.7554/eLife.22520 (PMC5302886; doi:10.7554/eLife.22520)
Supplement: Supplementary file 7. — DOI: http://dx.doi.org/10.7554/eLife.22520.018 [file elife-22520-supp7.xlsx]

## Sheet: combined DESeq output
gene	baseMean	log2FoldChange-BLSID	lfcSE-BLSID	stat-BLSID	pvalue-BLSID	padj-BLSID	log2FoldChange-CDBLSID	lfcSE-CDBLSID	stat-CDBLSID	pvalue-CDBLSID	padj-CDBLSID	MGM62321	MGM62322	MGM62323	MGM62341	MGM62342	MGM62343	MGM62361	MGM62362	MGM62363
accD	2.64984	0.470924	0.388851	1.21107	0.22587	0.325488	-0.115272	0.374436	-0.307856	0.758192	0.845451	3.25607	2.05921	1.10737	1.16175	2.00261	1.40969	4.68154	5.81234	2.35797
aceA	1767.84	-0.0419366	0.140198	-0.299124	0.764845	0.833892	0.198103	0.141064	1.40435	0.160213	0.278098	1571.05	1763.71	1752.97	1932	2042.66	1894.62	1382.22	2083.14	1488.22
aceE	8994.39	-0.0360722	0.087899	-0.410382	0.681526	0.765566	-0.46128	0.0884425	-5.21559	1.83229e-07	1.48987e-06	10657.1	9657.67	9683.99	7260.96	7149.31	7282.46	9015.08	10884.2	9358.78
ackA	602.004	-0.134255	0.0896061	-1.49828	0.134059	0.213417	0.154162	0.0938123	1.64331	0.10032	0.194368	576.324	622.91	590.23	673.817	706.921	621.673	532.915	521.948	571.302
acnA	7445.56	-0.100223	0.0945274	-1.06025	0.289029	0.397097	-0.187455	0.0949881	-1.97346	0.048443	0.108035	8132.02	7712.75	8011.85	7230.76	7033.16	6642.46	6761.7	8446.49	7038.87
acpP	7342.75	-0.757692	0.132442	-5.72094	1.05936e-08	6.56604e-08	-1.21926	0.132972	-9.16931	4.76049e-20	1.7091e-18	13099.1	11175.3	8760.44	4636.56	4676.09	4513.83	6913.07	5833.26	6477
acpS	2389.3	-0.1972	0.101719	-1.93867	0.052542	0.0971576	-0.346285	0.103143	-3.35734	0.000786963	0.00316616	2656.95	2864.35	2586.83	2086.51	2162.82	2104.67	2526.86	1999.44	2515.28
add	541.996	0.510037	0.141644	3.60084	0.00031719	0.00101606	0.397039	0.145122	2.7359	0.0062209	0.0191115	408.636	423.167	456.238	561.127	606.79	549.779	525.893	775.366	570.965
adk	2444.2	-0.493627	0.0681096	-7.24753	4.24444e-13	4.57898e-12	-0.3213	0.0698248	-4.60151	4.19438e-06	2.73113e-05	2756.26	3008.5	3007.63	2378.11	2246.93	2383.79	2039.59	2038.97	2138
ahcY	10500.6	-0.262003	0.127863	-2.04909	0.0404535	0.0779178	-0.410076	0.128116	-3.20081	0.00137041	0.00516854	12602.6	11842.5	12232.1	9122.09	9462.32	8799.28	8463.44	12497.7	9483.41
ahpD	2354.47	-0.41863	0.0835933	-5.00794	5.50156e-07	2.76129e-06	-0.770029	0.085859	-8.96853	3.00499e-19	1.02827e-17	3233.27	2997.17	2869.21	1778.65	1766.3	1752.24	2233.48	2460.94	2098.93
alaS	7069.28	-0.639285	0.0495161	-12.9107	3.91949e-38	2.60112e-36	-0.285937	0.0502223	-5.69343	1.24512e-08	1.20478e-07	8592.76	8480.84	8784.8	7034.42	7165.33	6997.7	5476.62	5465.92	5625.1
alc	396.403	-0.644225	0.094405	-6.82405	8.85067e-12	8.1441e-11	-0.408441	0.101637	-4.01861	5.85421e-05	0.000305984	481.898	495.239	520.466	377.57	346.451	396.123	331.219	305.729	312.936
ald	406.297	-0.269575	0.155905	-1.7291	0.0837917	0.144491	-1.18087	0.164919	-7.1603	8.04999e-13	1.38451e-11	647.957	489.061	491.674	176.587	272.355	245.286	490.781	426.626	416.35
algD	29.5343	-0.0121738	0.26016	-0.0467934	0.962678	0.975747	0.709478	0.271329	2.61483	0.00892723	0.0260559	29.3046	25.7401	16.6106	38.3379	48.0626	39.4713	23.4077	18.5995	26.2745
alr	994.148	-0.131989	0.101827	-1.2962	0.194907	0.288865	0.0799818	0.1042	0.767579	0.442737	0.590496	939.375	1031.66	1044.25	1105.99	1055.37	1031.89	1009.26	797.453	932.071
amiF	35.1809	-0.675428	0.233407	-2.89377	0.00380644	0.0096744	-0.432329	0.255935	-1.68922	0.0911779	0.180216	39.0728	49.4209	45.4023	31.3674	42.0548	25.3744	23.7978	34.874	25.264
ampC	362.032	0.345524	0.148795	2.32215	0.0202249	0.0425891	0.0127596	0.154774	0.0824401	0.934297	0.963782	291.418	328.443	364.326	340.394	340.443	315.77	370.622	528.923	377.949
amt	804.542	-0.412057	0.138149	-2.98271	0.00285707	0.00748145	-0.319927	0.14062	-2.27511	0.0228993	0.0582231	1015.89	977.093	853.785	765.596	821.069	678.061	616.402	864.876	648.105
anmK	7.8485	0.39159	0.355751	1.10074	0.271008	0.377151	0.0528871	0.377659	0.140039	0.888629	0.936224	6.51213	6.17762	7.75162	8.13228	6.00782	7.04845	9.7532	8.13727	11.1161
araA	3.00581	0.602687	0.39006	1.54511	0.122319	0.197696	0.181476	0.382053	0.475002	0.634786	0.755533	0	2.05921	3.32212	3.48526	0	4.22907	6.24205	2.32494	5.38964
araB	4.13529	0.0953502	0.391206	0.243734	0.807437	0.864831	0.208253	0.392333	0.530808	0.595552	0.724899	3.25607	2.05921	5.53687	3.48526	6.00782	5.63876	4.68154	1.16247	5.38964
arcA	301.645	-0.504939	0.139877	-3.60988	0.000306338	0.000982735	-0.504822	0.14707	-3.43253	0.000597985	0.0025008	407.008	373.746	352.145	291.6	260.339	232.599	232.126	319.679	245.566
argB	506.585	-0.470118	0.0984096	-4.77716	1.7779e-06	8.23752e-06	-0.514777	0.105106	-4.89771	9.69595e-07	7.06235e-06	691.914	629.087	573.62	439.143	454.592	421.497	453.329	423.138	472.941
argC	693.253	-0.133462	0.106994	-1.24738	0.212257	0.309413	-0.134291	0.110948	-1.21039	0.226129	0.361621	724.474	714.544	768.518	692.405	682.889	632.951	637.079	775.366	611.051
argD	914.661	-0.371356	0.0762264	-4.87175	1.10614e-06	5.26617e-06	-0.457098	0.081202	-5.62915	1.81099e-08	1.71939e-07	1180.32	1039.9	1080.8	791.155	805.049	795.065	848.138	852.089	839.437
argF	587.889	-0.17121	0.130574	-1.31121	0.189787	0.282295	-0.404297	0.135094	-2.9927	0.0027652	0.00954168	600.744	713.515	697.646	544.863	464.605	496.211	667.509	484.749	621.156
argG	2012.48	-0.196046	0.0660148	-2.96972	0.00298068	0.00774062	-0.318595	0.0686374	-4.64171	3.45538e-06	2.28619e-05	2285.76	2257.92	2229.14	1825.12	1814.36	1780.44	1911.63	2091.28	1916.69
argH	1300.58	-0.22302	0.0651434	-3.42352	0.000618165	0.00186044	-0.234189	0.068871	-3.4004	0.00067288	0.00276914	1452.21	1463.07	1415.22	1253.53	1219.59	1201.06	1226.56	1210.13	1263.87
argJ	701.502	-0.354758	0.077875	-4.55548	5.22656e-06	2.2606e-05	-0.435662	0.0841162	-5.17929	2.22738e-07	1.79117e-06	851.461	862.807	797.309	638.965	588.767	616.034	648.003	653.307	656.863
argR	404.457	-0.322206	0.12226	-2.63542	0.00840328	0.0197106	-0.0729924	0.127008	-0.574708	0.565489	0.699126	459.105	424.196	445.164	375.247	468.61	422.907	380.765	295.267	368.854
argS	2555.76	-1.23248	0.0683221	-18.0393	9.58307e-73	3.70358e-70	-0.64166	0.069553	-9.22548	2.82281e-20	1.03608e-18	3583.3	3853.8	3713.03	2392.05	2475.22	2265.37	1617.47	1584.44	1517.18
aroA	929.975	0.00369155	0.111778	0.0330257	0.973654	0.982526	-0.124683	0.114814	-1.08596	0.277499	0.418254	954.027	933.85	986.67	916.624	807.051	902.201	1076.36	811.402	981.589
aroB	1736.82	-0.360277	0.0906274	-3.97537	7.02714e-05	0.000252838	-0.322093	0.092579	-3.47912	0.000503062	0.00214758	2122.95	1978.9	1982.2	1706.62	1513.97	1619.73	1592.89	1414.72	1699.42
aroC	2627.69	0.0834229	0.112339	0.742601	0.457723	0.568476	-0.103747	0.113454	-0.914437	0.360487	0.50661	2396.46	2693.44	2821.59	2457.11	2301	2593.83	3090.59	2383.06	2912.09
aroE	553.778	-0.256628	0.131149	-1.95676	0.0503757	0.0937384	-0.0793628	0.134509	-0.59002	0.555177	0.690817	543.763	623.939	627.881	564.613	588.767	548.369	572.708	397.564	516.395
aroK	1307.22	-0.192785	0.0670901	-2.87353	0.00405916	0.0102651	-0.199172	0.0706497	-2.81915	0.00481507	0.0153122	1488.02	1378.64	1425.19	1253.53	1267.65	1209.51	1266.75	1231.05	1244.67
aroQ	524.687	-0.38794	0.0843778	-4.59766	4.27269e-06	1.87144e-05	-0.309623	0.0910751	-3.39964	0.000674742	0.00277413	633.305	602.318	610.163	503.04	460.6	513.127	466.593	453.362	479.678
arsB	86.5171	-0.0714656	0.232352	-0.307575	0.758406	0.829175	0.222449	0.240042	0.926712	0.354076	0.499845	70.0054	91.6346	83.0531	108.043	112.146	73.3039	60.86	113.922	65.6863
arsC	382.223	-0.0868248	0.0957335	-0.906943	0.364437	0.477152	-0.290672	0.105132	-2.76481	0.00569551	0.0177428	420.032	411.841	413.051	310.188	376.49	335.506	391.689	399.889	381.317
asd	3045.49	-0.792208	0.0742033	-10.6762	1.3158e-26	4.02086e-25	-0.484111	0.0753847	-6.42188	1.34604e-10	1.74772e-09	3684.24	4205.93	4091.75	2942.72	2703.52	2892.68	2318.53	2267.97	2302.05
asnB	29953.3	0.340613	0.0573817	5.93592	2.92208e-09	1.95899e-08	0.219708	0.0575648	3.81671	0.000135244	0.000657214	25503.1	25976.9	27028.8	30533.2	31380.9	29597.8	32181.3	34270.7	33107.2
aspA	1941.36	0.890168	0.134792	6.60399	4.00229e-11	3.41494e-10	0.0782477	0.136465	0.573389	0.566382	0.699384	1610.12	1438.36	1377.57	1554.43	1594.08	1529.51	2286.93	3408.36	2672.93
aspS	2398.39	-0.529493	0.0706048	-7.49939	6.41134e-14	7.49511e-13	-0.320857	0.072243	-4.44136	8.93904e-06	5.49387e-05	2860.45	2897.3	2907.96	2293.3	2475.22	2168.1	1947.52	1968.06	2067.6
atpA	12875.3	-0.521564	0.10726	-4.86263	1.15838e-06	5.50193e-06	-0.473679	0.107487	-4.40686	1.04881e-05	6.36844e-05	16687.3	15925.9	15517.6	11775.5	11649.2	11013.9	9552.68	12901.1	10854.1
atpB	3889.13	-0.844109	0.167019	-5.05397	4.32722e-07	2.19028e-06	-0.066794	0.167192	-0.399505	0.689522	0.795602	5116.91	4566.29	4348.66	4125.39	5553.23	3693.39	2130.88	3144.48	2322.94
atpC	2408.43	-0.418752	0.0604675	-6.92525	4.35217e-12	4.17427e-11	-0.382638	0.0626755	-6.10506	1.02759e-09	1.15802e-08	2829.52	2865.38	2931.22	2232.89	2108.75	2256.91	2129.32	2204.04	2117.79
atpD	10405	-0.422301	0.0873662	-4.8337	1.34021e-06	6.30291e-06	-0.400835	0.0877197	-4.5695	4.88899e-06	3.15218e-05	13221.3	12272.9	11986.2	9222	9894.89	9172.85	8504.01	10237.9	9133.42
atpE	2230.34	-0.410156	0.0710116	-5.7759	7.65434e-09	4.83756e-08	-0.72118	0.0737428	-9.77967	1.37663e-22	6.02963e-21	2919.06	2819.05	2789.48	1640.4	1718.24	1791.72	2046.22	2099.42	2249.5
atpG	5542.69	-0.671637	0.0766399	-8.76354	1.89208e-18	3.26233e-17	-0.361605	0.0772433	-4.68138	2.84949e-06	1.91908e-05	7309.87	6692.42	6770.49	5517.17	5619.32	4990.3	4124.04	4501.08	4359.55
atzF	200.858	0.448503	0.14007	3.20198	0.00136486	0.00382719	0.61958	0.147491	4.20079	2.65982e-05	0.000148977	128.615	165.766	160.569	233.513	278.363	211.453	220.032	191.807	217.607
azi	1717.17	-0.72488	0.0820979	-8.82945	1.05191e-18	1.85282e-17	-0.551949	0.0842306	-6.55283	5.6458e-11	7.72769e-10	2243.43	2287.78	2252.4	1596.25	1407.83	1592.95	1461.81	1282.2	1329.89
bfr	1373.44	-0.458731	0.148507	-3.08895	0.00200864	0.00545094	-0.515483	0.150053	-3.43534	0.000591808	0.00247971	1916.19	1569.11	1642.24	1086.24	1319.72	1133.39	1051.79	1539.11	1103.19
bioA	457.466	-0.0982015	0.137863	-0.712313	0.476271	0.586523	-0.343466	0.143227	-2.39806	0.0164823	0.0441921	431.429	536.423	549.258	367.114	396.516	427.136	529.404	387.102	492.815
bioB	128.068	0.0325291	0.165477	0.196578	0.844158	0.892664	-0.432047	0.182101	-2.37257	0.0176649	0.0470063	117.218	144.144	153.925	112.69	90.1174	98.6783	125.231	175.533	135.078
bioD	80.2979	-0.469714	0.21432	-2.19164	0.0284052	0.0573516	-0.917677	0.233686	-3.92697	8.60213e-05	0.000435744	91.1698	101.931	138.422	59.2495	34.0443	67.6651	92.4604	61.6108	76.1287
bioF	187.48	-0.535068	0.139003	-3.84934	0.000118438	0.000408258	-0.606177	0.151227	-4.0084	6.11303e-05	0.000317994	211.644	256.371	258.018	152.19	148.193	170.572	184.921	138.334	167.079
bluB	143.402	-0.123183	0.13899	-0.886272	0.375471	0.488001	-0.276514	0.154181	-1.79343	0.0729037	0.150717	144.895	162.677	166.106	137.087	124.162	126.872	158.392	123.222	147.205
cadA	9.76979	-0.629258	0.332139	-1.89456	0.0581506	0.106066	-0.932492	0.364598	-2.55759	0.0105401	0.0300036	17.9084	12.3552	15.5032	5.80877	6.00782	5.63876	8.97295	6.97481	8.75817
carA	1945.68	0.17449	0.0956162	1.8249	0.0680158	0.121233	-0.0870713	0.0974968	-0.893068	0.371821	0.519189	1859.21	1898.59	1948.98	1862.29	1742.27	1760.7	2362.62	1870.41	2206.05
carB	8130.65	0.189267	0.062917	3.0082	0.00262796	0.00696198	-0.115011	0.063653	-1.80684	0.070787	0.147081	8267.15	7920.73	7700.68	7661.77	7419.66	6956.82	9202.73	8966.11	9080.2
catA	1635.85	0.963099	0.140132	6.87281	6.29507e-12	5.89994e-11	0.991516	0.141099	7.0271	2.10877e-12	3.42089e-11	957.283	872.074	1094.09	1973.82	2052.67	1928.46	1621.37	2385.38	1837.53
cbbQ	6.66653	0.688329	0.38032	1.80987	0.070316	0.124623	0.380908	0.390335	0.975847	0.32914	0.473806	4.8841	4.11841	3.32212	4.64702	2.00261	12.6872	7.80256	12.7871	7.74761
cbiM	652.079	-0.246707	0.178697	-1.38059	0.167406	0.255424	-0.173181	0.180775	-0.957995	0.338065	0.484003	659.353	766.024	739.726	669.17	566.738	669.603	691.307	398.726	708.064
cbiQ	312.451	-0.454349	0.102736	-4.42248	9.7573e-06	4.03941e-05	-0.466921	0.112637	-4.14537	3.39262e-05	0.000185901	390.728	363.45	399.762	263.718	268.35	296.035	285.964	258.068	285.988
ccsB	929.364	0.495719	0.10515	4.71438	2.42442e-06	1.10232e-05	0.309877	0.108236	2.86298	0.00419676	0.0136229	672.377	843.245	764.088	970.065	973.268	905.021	1132.93	974.148	1129.13
cdd	25.1676	0.678396	0.265484	2.55531	0.0106092	0.0242528	0.204945	0.295103	0.694484	0.487379	0.632072	21.1644	22.6513	14.3959	22.0733	30.0391	18.326	35.1115	29.0617	33.6853
cdsA	1147.94	-0.12407	0.0910125	-1.36322	0.172813	0.261971	-0.396994	0.0946252	-4.19544	2.7234e-05	0.000152149	1242.19	1335.39	1291.2	950.315	943.228	1033.3	1186.77	1065.98	1283.07
cheR	1322.04	-0.0110882	0.0756438	-0.146584	0.88346	0.919863	0.137575	0.078222	1.75878	0.0786156	0.160355	1284.52	1245.82	1311.13	1369.71	1465.91	1399.82	1200.03	1346.14	1275.32
clpP	8165.52	0.169006	0.142228	1.18827	0.234727	0.336017	-0.128483	0.142519	-0.901515	0.367315	0.514334	8255.75	7970.15	7937.66	7431.74	7431.68	7171.09	7418.68	11666.5	8206.41
clpS	1044.69	-0.236199	0.0962977	-2.4528	0.0141749	0.0313038	0.0174224	0.0986677	0.176577	0.859841	0.915881	1061.48	1146.98	1071.94	1025.83	1251.63	1058.68	871.936	975.31	938.472
clpX	5120.97	-0.32432	0.0741741	-4.37242	1.22878e-05	5.01435e-05	0.0588149	0.0747394	0.786933	0.431321	0.579268	5338.32	5619.57	5267.78	5535.76	5737.47	5640.17	4011.69	4654.52	4283.42
cmk	760.801	-0.170886	0.113836	-1.50116	0.133313	0.212383	-0.145962	0.117129	-1.24617	0.212703	0.346249	744.011	857.659	857.108	745.846	678.884	792.246	777.135	621.92	772.403
coaA	1011.08	-0.0092075	0.117232	-0.0785409	0.937398	0.957957	0.28025	0.119011	2.35483	0.0185313	0.0488567	931.235	942.086	954.556	1172.21	1091.42	1184.14	802.103	1112.48	909.502
coaBC	4731.95	0.269327	0.0722132	3.72961	0.000191776	0.000638613	0.285293	0.073025	3.90678	9.35347e-05	0.000470899	3892.63	4328.45	4199.16	5211.63	4908.39	5046.69	4795.45	4930.03	5275.11
coaD	1567.85	-0.172539	0.108409	-1.59155	0.111485	0.182886	0.572328	0.109099	5.24595	1.55481e-07	1.28009e-06	1391.97	1440.41	1334.39	1988.92	2433.17	1835.42	1292.88	1189.2	1204.25
cobA	867.45	-0.374166	0.131345	-2.84873	0.00438945	0.0110015	-0.366967	0.133958	-2.73942	0.00615475	0.0189638	950.771	1058.43	1074.15	791.155	769.002	813.391	888.322	612.621	849.206
cobB	682.828	-0.0397961	0.16122	-0.246843	0.80503	0.863484	-0.0355108	0.163558	-0.217114	0.828119	0.894418	623.536	703.219	761.873	706.347	638.832	690.748	798.592	483.587	738.718
cobD	539.114	1.40021	0.189979	7.37035	1.70175e-13	1.90793e-12	0.673948	0.193211	3.48814	0.0004864	0.00208457	253.973	295.496	338.856	525.113	398.519	541.321	998.728	580.071	919.945
cobF	376.166	0.777932	0.109368	7.11295	1.13587e-12	1.16604e-11	0.230994	0.11828	1.95294	0.0508263	0.1127	280.022	289.318	295.669	370.6	294.383	346.784	474.006	540.548	494.163
cobG	262.027	0.0779903	0.162443	0.480108	0.631151	0.724181	-0.494232	0.171634	-2.87956	0.00398227	0.0130426	262.113	268.726	327.783	195.175	192.25	211.453	361.649	227.844	311.252
cobH	469.548	-0.368883	0.128547	-2.86962	0.00410962	0.0103727	-0.107169	0.132374	-0.809596	0.418173	0.566824	436.313	530.245	600.197	489.099	484.631	483.524	442.405	349.903	409.613
cobK	300.784	-0.0670697	0.121517	-0.551935	0.580993	0.681507	-0.200462	0.130005	-1.54196	0.123084	0.227792	327.235	314.029	324.461	319.482	252.329	257.973	317.954	268.53	325.063
cobL	294.777	0.260188	0.192545	1.35131	0.176595	0.266719	-0.10361	0.197803	-0.523804	0.600415	0.728025	266.997	288.289	293.454	286.953	224.292	272.07	432.262	223.194	365.485
cobM	176.944	0.321785	0.139752	2.30254	0.0213045	0.0445058	-0.0563638	0.153037	-0.368302	0.712648	0.812723	143.267	178.121	172.75	149.866	148.193	179.031	204.037	187.157	230.07
cobN	4392.2	-0.138599	0.0639131	-2.16856	0.0301164	0.0603266	-0.182927	0.0650638	-2.8115	0.00493116	0.0155927	4516.16	4707.34	4955.5	4204.39	3989.2	4284.05	4328.47	4204.65	4340.01
cobO	767.858	-0.107346	0.085418	-1.25671	0.208859	0.305682	-0.00605522	0.0895652	-0.0676069	0.946099	0.969389	760.291	798.972	800.631	827.169	807.051	718.942	702.621	763.741	731.307
cobQ	489.808	-0.195618	0.0987859	-1.98022	0.0476788	0.0895	-0.364837	0.105872	-3.44602	0.000568906	0.00239597	504.69	569.37	593.553	433.334	418.545	439.823	508.337	441.738	498.879
cobS	65.1329	0.0169343	0.262747	0.0644508	0.948611	0.965212	-0.205147	0.274404	-0.747608	0.454696	0.602715	61.8652	73.1018	71.9793	54.6024	50.0652	70.4845	86.9986	32.5491	84.55
cobT	280.602	-0.371292	0.196448	-1.89003	0.0587544	0.106989	-0.398027	0.201128	-1.97897	0.0478194	0.106825	283.278	348.006	380.937	273.012	204.266	273.48	319.905	172.045	270.493
cobU	451.634	-0.773806	0.16962	-4.562	5.06681e-06	2.19723e-05	-0.547439	0.172819	-3.16771	0.00153646	0.00570958	545.391	587.903	686.572	455.408	316.412	444.052	401.442	262.718	364.811
cofD	903.856	-0.835996	0.112133	-7.45539	8.96044e-14	1.0292e-12	-0.318754	0.114102	-2.79359	0.0052126	0.0164214	1076.13	1200.52	1173.82	909.654	981.278	869.779	558.663	739.329	625.535
corA	120.29	-0.0343172	0.145651	-0.235613	0.813733	0.869446	0.328996	0.156566	2.10132	0.0356129	0.0842751	126.987	100.901	107.415	131.278	146.19	145.198	103.384	110.434	110.825
crcB	56.5298	-0.372247	0.20338	-1.83031	0.0672043	0.119982	0.168933	0.21607	0.781844	0.434306	0.582053	56.9811	55.5985	60.9056	66.22	80.1043	53.5682	37.4523	53.4735	44.4646
ctaD	80.698	0.447988	0.206902	2.16521	0.0303713	0.0607584	-0.125079	0.22546	-0.554773	0.57905	0.711095	74.8895	72.0722	69.7646	55.7642	82.1069	62.0263	93.6307	134.846	81.1815
cydB	270.14	1.41885	0.177307	8.00223	1.22184e-15	1.63493e-14	0.551612	0.185027	2.98125	0.00287075	0.00982848	183.968	145.174	131.778	224.219	220.287	242.467	483.759	313.866	485.742
cydD	201.168	1.73939	0.203422	8.55064	1.22409e-17	1.96633e-16	0.70955	0.212371	3.34109	0.000834511	0.00333572	87.9138	107.079	89.6973	169.616	138.18	179.031	410.025	232.494	396.476
cynS	24.8226	0.399772	0.277935	1.43837	0.15033	0.233768	0.0543253	0.303538	0.178974	0.857958	0.914321	13.0243	30.8881	18.8254	19.7498	32.0417	18.326	30.0399	32.5491	27.9588
cyoE	2491.74	-0.767281	0.100863	-7.60714	2.8023e-14	3.372e-13	-0.0772042	0.10146	-0.76093	0.446699	0.59465	2915.81	3112.49	2829.34	2758	3070	2569.86	1635.03	1927.37	1607.8
cysA	910.713	1.09039	0.0841734	12.9541	2.22728e-38	1.49319e-36	1.1773	0.0870972	13.5171	1.23953e-41	2.08812e-39	498.178	514.801	493.889	1121.09	1233.61	1100.97	1092.36	1032.27	1109.26
cysD	51.8293	-0.00157116	0.212065	-0.00740887	0.994089	0.996211	0.261169	0.227393	1.14853	0.250748	0.390247	52.097	49.4209	45.4023	70.867	60.0782	46.5198	52.6673	37.199	52.2122
cysE	154.867	0.171654	0.237805	0.721826	0.470401	0.580165	0.165037	0.242992	0.679187	0.49702	0.640482	174.199	142.085	108.523	173.101	136.177	169.163	120.94	242.956	126.657
cysM	1460.22	-0.0587911	0.0749406	-0.784503	0.432745	0.544245	-0.327699	0.0783807	-4.18086	2.90408e-05	0.000161283	1580.82	1527.93	1662.17	1324.4	1205.57	1254.62	1467.66	1594.91	1523.92
cysNC	96.7877	0.0414127	0.163061	0.253971	0.799518	0.859429	0.129281	0.17756	0.728101	0.466552	0.614401	89.5418	101.931	86.3752	115.014	82.1069	104.317	92.0702	108.11	91.6239
cysS	4574.88	-0.867092	0.0966476	-8.97169	2.92006e-19	5.46576e-18	-0.399365	0.0971386	-4.11129	3.93455e-05	0.000212757	5616.71	6159.08	6145.93	4611	4405.74	4513.83	3561.87	2807.36	3352.36
cysT	334.23	1.45413	0.119664	12.1518	5.61353e-34	2.95047e-32	0.913144	0.127834	7.14322	9.11669e-13	1.55298e-11	156.291	192.536	174.965	343.879	308.402	356.651	509.897	448.713	516.732
cysW	475.707	1.04629	0.111994	9.3423	9.42649e-21	2.00427e-19	1.04073	0.116415	8.93978	3.89937e-19	1.31914e-17	281.65	277.993	264.662	612.244	610.796	501.85	536.816	602.158	593.198
dacB	925.836	-0.567633	0.104814	-5.41562	6.10781e-08	3.42684e-07	-0.584108	0.108266	-5.39512	6.84766e-08	5.97465e-07	1043.57	1188.16	1339.92	760.949	766.999	840.175	840.336	756.767	795.646
dapA	1153.72	-0.667238	0.0788679	-8.4602	2.66922e-17	4.17542e-16	-0.623387	0.082556	-7.55108	4.31659e-14	8.72616e-13	1435.92	1566.03	1568.04	1045.58	925.205	976.915	989.755	939.274	936.787
dapB	703.014	-0.494594	0.0902708	-5.479	4.27736e-08	2.46079e-07	-0.490542	0.0954232	-5.1407	2.73717e-07	2.15368e-06	864.485	835.008	914.691	620.377	644.84	589.25	586.362	676.556	595.556
dapE	238.968	-0.965156	0.135002	-7.14922	8.7275e-13	9.02987e-12	-0.825639	0.14449	-5.71416	1.10248e-08	1.07149e-07	343.515	366.539	338.856	200.983	216.282	166.343	197.015	142.984	178.195
dapF	471.796	-0.328128	0.168522	-1.94709	0.051524	0.0955171	-0.551854	0.172689	-3.19566	0.00139512	0.00525334	514.458	590.992	627.881	433.334	306.399	414.449	546.179	345.253	467.215
dcd	396.171	-0.00216625	0.0962017	-0.0225178	0.982035	0.986691	-0.190963	0.104937	-1.81979	0.0687915	0.143936	434.685	424.196	383.151	348.526	390.509	349.603	406.904	404.539	423.424
ddl	991.576	-0.518227	0.134674	-3.84801	0.000119083	0.000410266	-0.269443	0.136479	-1.97425	0.0483538	0.107909	1054.97	1252	1244.69	1025.83	905.179	998.06	910.169	644.007	889.291
def	1022.24	-1.29542	0.0878401	-14.7475	3.19277e-49	4.03394e-47	-0.911222	0.09103	-10.0101	1.37566e-23	6.45578e-22	1579.19	1534.11	1645.56	815.551	941.226	764.052	630.057	659.119	631.262
dehII	134.446	0.0367535	0.142903	0.257192	0.797031	0.857879	0.0712222	0.156022	0.456488	0.648039	0.765071	140.011	114.286	140.637	148.705	138.18	125.462	127.572	133.684	141.478
deoA	370.41	0.754126	0.0947603	7.95825	1.74487e-15	2.30197e-14	0.185993	0.105472	1.76344	0.077826	0.159091	281.65	286.23	300.098	334.585	332.433	324.229	507.947	480.099	486.415
deoC	367.517	-0.388718	0.203857	-1.90681	0.0565446	0.10362	-0.478219	0.207454	-2.30517	0.0211568	0.0544743	392.356	480.824	481.708	349.688	286.373	310.132	443.966	209.244	353.358
dhaK	163.917	0.784926	0.136694	5.74223	9.34402e-09	5.84113e-08	0.48149	0.14965	3.21744	0.00129342	0.00490634	118.846	119.434	115.167	177.748	176.23	146.608	218.472	210.407	192.343
dinB	0	NA	NA	NA	NA	NA	NA	NA	NA	NA	NA	0	0	0	0	0	0	0	0	0
dinP	98.9741	-0.102047	0.197284	-0.517259	0.604975	0.701783	-0.695433	0.215791	-3.22272	0.00126979	0.00482784	118.846	95.7531	141.744	66.22	76.0991	69.0748	131.473	79.0478	112.509
dnaA	2021.19	-0.522789	0.115552	-4.52426	6.06059e-06	2.58816e-05	0.231868	0.116075	1.99757	0.0457636	0.103428	2051.32	2286.75	1994.38	2374.63	2731.56	2366.87	1297.57	1691.39	1396.25
dnaE	10023	-1.04453	0.0625215	-16.7068	1.16907e-62	2.84473e-60	-0.372792	0.0627993	-5.93625	2.91607e-09	3.07029e-08	13555	13484.7	12982.9	10423.3	10659.9	9779.02	6228.78	6684.19	6408.96
dnaE2	449.124	-0.302411	0.0974119	-3.10446	0.00190628	0.00519248	-0.43025	0.105231	-4.08864	4.33904e-05	0.000232904	504.69	530.245	547.043	396.158	432.563	346.784	428.751	442.9	412.981
dnaG	1413.43	-0.190949	0.0686447	-2.7817	0.00540753	0.0132664	0.119957	0.0710046	1.68943	0.0911374	0.18019	1406.62	1451.74	1435.16	1631.1	1548.02	1488.63	1280.79	1249.65	1229.18
dnaJ	3335.51	0.215667	0.0616838	3.49634	0.000471687	0.00146871	-0.27231	0.0637666	-4.27041	1.95111e-05	0.000112052	3431.89	3302.97	3309.94	2630.21	2855.72	2826.43	3952.78	3795.46	3914.23
dnaK	7174.33	0.497506	0.126297	3.93918	8.17592e-05	0.000289885	-0.00575878	0.126719	-0.0454452	0.963752	0.979708	7239.86	5966.55	5668.65	6006.27	6562.55	6225.19	7865.76	10508.7	8525.4
dnaN	4055.7	-0.134364	0.0665616	-2.01864	0.043525	0.0828066	0.37228	0.0672182	5.53838	3.0528e-08	2.80516e-07	3667.96	3836.3	3869.17	4796.88	5262.85	4711.18	3474.09	3407.19	3475.65
dtd	112.413	-0.0938446	0.145191	-0.646353	0.518051	0.624951	-0.220826	0.162928	-1.35536	0.175304	0.297609	110.706	135.908	116.274	106.881	104.136	100.088	117.038	103.46	117.225
dut	1232.75	-0.352295	0.0819162	-4.30068	1.70278e-05	6.82568e-05	-0.328655	0.0850165	-3.86578	0.000110734	0.000549701	1375.69	1431.15	1493.85	1132.71	1249.63	1045.99	1113.43	1142.71	1109.59
dxr	1233.51	-0.109975	0.117785	-0.933691	0.350463	0.462172	-0.278035	0.120084	-2.31533	0.020595	0.0532713	1253.59	1354.96	1438.48	1146.65	1033.35	1140.44	1414.21	1041.57	1278.36
dxs	3092.2	0.0458317	0.0822457	0.557253	0.577354	0.678087	-0.0723118	0.083522	-0.865781	0.38661	0.534693	2915.81	3116.61	3298.87	3108.85	2783.63	2974.45	3329.74	2995.68	3306.21
eat	486.557	-0.857272	0.137371	-6.24056	4.36009e-10	3.24782e-09	-0.426089	0.1406	-3.0305	0.00244153	0.00859178	703.31	618.791	595.767	471.672	492.642	448.281	299.618	431.276	317.652
ectA	1365.4	0.445886	0.131867	3.38135	0.000721318	0.00214729	0.823152	0.132813	6.19784	5.7242e-10	6.76402e-09	882.394	1103.73	952.342	1861.13	1694.21	1739.56	1106.01	1544.92	1404.34
ectB	2153.5	0.515777	0.147859	3.4883	0.000486094	0.00150857	0.445058	0.148662	2.99377	0.00275558	0.00951348	1546.63	1718.41	1793.95	2335.13	2305	2333.04	1933.47	3108.44	2307.44
ectC	742.326	0.452034	0.206278	2.19139	0.0284238	0.0573646	0.165635	0.207997	0.796332	0.425839	0.573783	654.469	604.377	627.881	655.229	779.015	703.435	621.084	1303.13	732.318
eda	655.501	-0.474008	0.113629	-4.17154	3.02547e-05	0.000116446	-0.504701	0.117989	-4.27752	1.88985e-05	0.000108915	778.2	761.906	908.047	561.127	532.694	616.034	595.726	511.486	634.294
edd	2545.09	-0.777725	0.0765907	-10.1543	3.17099e-24	8.36683e-23	-0.539391	0.0780627	-6.90972	4.85617e-12	7.52477e-11	3479.11	3209.27	3431.75	2339.77	2226.9	2362.64	1965.86	1813.45	2077.03
efp	2501.04	-0.579944	0.0818416	-7.08617	1.37875e-12	1.40006e-11	-0.299074	0.083098	-3.59905	0.000319379	0.00142355	2964.65	2998.2	3116.15	2424.58	2491.24	2450.04	1864.03	2234.26	1966.21
ehuA	152.191	-0.160083	0.138348	-1.15711	0.247229	0.350592	-0.448682	0.15473	-2.89977	0.00373438	0.0123726	179.084	164.736	177.18	111.528	128.167	138.15	149.029	179.02	142.826
ehuB	219.744	-0.216451	0.130316	-1.66096	0.0967213	0.162771	0.279106	0.136448	2.04551	0.0408044	0.0940649	210.016	213.128	214.831	249.777	266.347	265.022	166.585	220.869	171.121
ehuC	164.096	-0.289229	0.136871	-2.11315	0.0345882	0.0679966	0.0680826	0.146041	0.466188	0.641081	0.759068	166.059	181.21	163.891	155.675	202.263	186.079	138.886	153.446	129.351
ehuD	113.455	-0.0652081	0.166791	-0.390956	0.69583	0.777865	-0.496056	0.185292	-2.67716	0.00742481	0.0223459	148.151	135.908	101.878	95.2638	86.1122	83.1717	110.406	142.984	117.225
engA	2026.75	-0.402535	0.0989195	-4.06932	4.71513e-05	0.000175217	-0.113932	0.100104	-1.13814	0.255062	0.394854	2155.52	2395.89	2269.01	2177.13	2064.69	2053.92	1803.95	1474.01	1846.63
eno	3867.91	-0.850996	0.0604077	-14.0876	4.53e-45	4.50941e-43	-0.697723	0.061805	-11.2891	1.48528e-29	1.1617e-27	5323.67	5222.15	5515.83	3330.75	3174.13	3360.7	2902.94	3068.91	2912.09
era	1403.37	-0.685287	0.0736076	-9.31001	1.2782e-20	2.67445e-19	-0.190593	0.0756243	-2.52026	0.0117268	0.0327991	1671.99	1755.47	1633.38	1525.38	1507.96	1398.41	1005.36	1062.5	1069.84
etfA	6826.95	0.159754	0.0691391	2.31062	0.0208537	0.0437449	-0.404873	0.0701212	-5.77391	7.74532e-09	7.65214e-08	7262.65	6768.61	7374	5563.64	5016.53	5534.44	8073.7	7795.51	8053.47
etfB	9210.49	-0.247098	0.087064	-2.83812	0.00453797	0.0113277	-0.474481	0.0875443	-5.4199	5.96313e-08	5.26583e-07	11747.9	10074.7	10590.9	8009.13	7904.29	7312.06	8618.32	9783.33	8853.84
eutB	386.427	-0.705417	0.113249	-6.22892	4.69651e-10	3.46697e-09	-0.322148	0.118517	-2.71815	0.0065649	0.0200053	511.202	470.528	461.775	384.541	398.519	365.11	276.601	341.766	267.798
eutC	95.4751	-0.701479	0.171987	-4.07868	4.52921e-05	0.000168881	-0.330809	0.184675	-1.7913	0.0732445	0.151231	141.639	120.464	97.4489	90.6168	100.13	90.2201	66.7119	86.0226	66.0231
fabG	4983.69	-0.306587	0.0911154	-3.36482	0.000765923	0.00226979	-0.497122	0.0919436	-5.40682	6.41545e-08	5.61993e-07	5956.97	5665.9	6245.59	4186.96	4045.27	4362.99	5168.03	4233.71	4987.78
fadD	27.5888	0.0609638	0.261603	0.233039	0.815731	0.870873	-0.017597	0.284923	-0.0617606	0.950753	0.972513	26.0485	33.9769	23.2549	32.5291	18.0235	29.6035	31.6004	20.9244	32.3379
fbaA	183.151	-0.841741	0.13684	-6.15128	7.68617e-10	5.4949e-09	-0.220193	0.143824	-1.53099	0.125772	0.231678	265.369	216.217	204.864	177.748	202.263	204.405	115.868	138.334	123.288
fbiC	5038.78	-0.588449	0.0539978	-10.8976	1.18296e-27	3.96532e-26	-0.0655934	0.0547182	-1.19875	0.230626	0.366525	5943.95	5663.84	5716.26	5588.04	5481.14	5471.01	3898.16	3730.36	3856.29
fdhD	282.233	0.100011	0.120908	0.827169	0.408141	0.520475	-0.651545	0.13475	-4.83519	1.33017e-06	9.49912e-06	332.119	303.733	307.85	185.881	220.287	188.898	328.488	297.592	375.254
ffh	3294.77	-0.552065	0.0747957	-7.38097	1.57136e-13	1.77081e-12	-0.37491	0.0759626	-4.93546	7.99621e-07	5.87641e-06	4123.81	3996.92	3987.65	3011.27	3344.36	2968.81	2902.55	2629.5	2688.08
fmt	369.054	0.0446436	0.106784	0.418073	0.675894	0.760511	0.0199596	0.114002	0.175081	0.861016	0.916241	379.332	329.473	384.259	403.129	342.446	353.832	374.133	391.752	363.127
fni	0.0433476	-0.00606888	0.146665	-0.0413791	0.966994	NA	0	0.14585	0	1	NA	0	0	0	0	0	0	0.390128	0	0
folA	550.029	-0.382568	0.11648	-3.2844	0.00102198	0.00294235	-0.66889	0.122586	-5.45649	4.8565e-08	4.36487e-07	659.353	727.929	692.109	420.555	442.576	432.775	595.726	438.25	540.985
folB	175.667	-0.105993	0.173304	-0.611601	0.540802	0.645425	0.276532	0.178956	1.54525	0.122286	0.227018	175.828	179.151	150.603	221.895	202.263	193.127	170.486	108.11	179.542
folC	3717.67	-0.152222	0.0923429	-1.64844	0.0992625	0.166196	-0.190339	0.0932568	-2.04102	0.0412493	0.0949906	3861.69	3995.89	4211.34	3728.07	3516.58	3312.77	3828.33	3202.6	3801.72
folE	1735.88	-0.317344	0.102996	-3.08112	0.00206224	0.00558488	-0.0101594	0.104264	-0.0974395	0.922377	0.955839	1751.76	1858.43	1977.77	1926.19	1858.42	1766.34	1340.09	1704.18	1439.71
folK	246.341	0.349301	0.164429	2.12432	0.0336433	0.0664173	0.260942	0.170636	1.52924	0.126206	0.232197	175.828	221.365	236.978	255.586	230.3	283.348	314.053	209.244	290.367
folP	1064.32	0.0105897	0.0702388	0.150768	0.880159	0.917605	0.286022	0.0732863	3.9028	9.50875e-05	0.000477984	991.472	972.975	998.851	1178.02	1267.65	1181.32	997.557	1012.51	978.557
frcK	74.8579	0.38948	0.173391	2.24626	0.0246876	0.0505762	-0.0694517	0.19701	-0.352529	0.724441	0.821325	55.3531	77.2202	71.9793	66.22	66.0861	64.8457	93.6307	81.3727	97.0136
frr	2273.47	-0.589265	0.134182	-4.39152	1.1256e-05	4.63648e-05	-0.234095	0.134897	-1.73535	0.0826785	0.167189	2832.78	2739.77	2597.9	2214.3	2603.39	2099.03	1567.92	2188.93	1617.23
ftsE	736.916	-0.420632	0.102602	-4.09963	4.13813e-05	0.000155624	-0.253262	0.106177	-2.38529	0.0170658	0.0455781	851.461	929.731	787.343	751.655	769.002	631.541	611.721	648.657	651.136
ftsW	2029.22	0.183415	0.101132	1.81363	0.0697355	0.123828	0.0295315	0.102676	0.287618	0.773639	0.857082	1748.51	1964.48	2069.68	2077.22	1798.34	2027.13	2298.24	1977.36	2302.05
ftsY	1951.07	0.0104894	0.0833768	0.125808	0.899884	0.931501	-0.27661	0.0856845	-3.22824	0.00124555	0.00474668	1971.55	2022.14	2211.43	1770.51	1576.05	1757.88	2205.78	2013.39	2030.88
ftsZ	3924.93	0.385706	0.0774435	4.98049	6.34251e-07	3.13546e-06	0.271453	0.0784401	3.46065	0.00053888	0.00227828	3273.97	3315.32	3450.58	4099.83	4127.38	3918.94	4588.3	3980.29	4569.74
fumC	3660.89	0.397463	0.06413	6.19777	5.72672e-10	4.17587e-09	-0.400111	0.0663368	-6.03151	1.62439e-09	1.78465e-08	3521.43	3513	3675.37	2712.7	2661.47	2723.52	4452.53	4831.22	4856.74
fusA	23.1435	0.165704	0.272351	0.60842	0.542909	0.64747	0.204133	0.295426	0.69098	0.489578	0.633762	29.3046	19.5625	15.5032	23.2351	24.0313	26.7841	26.5287	19.762	23.5797
fxsA	774.339	1.35215	0.103544	13.0587	5.66633e-39	4.00299e-37	1.8308	0.105327	17.382	1.12869e-67	5.70422e-65	294.674	305.792	358.789	1237.27	1073.4	1189.78	802.103	871.851	835.395
gabD2	393.185	-0.0136303	0.106455	-0.128037	0.898119	0.930407	-0.163635	0.114114	-1.43396	0.151582	0.267101	415.148	406.693	405.299	381.055	328.428	376.387	383.106	456.85	385.696
gabT	229.904	-0.552135	0.127228	-4.33971	1.4267e-05	5.76472e-05	-0.398941	0.136567	-2.92121	0.0034868	0.0116404	280.022	269.756	296.776	197.498	250.326	195.947	177.508	217.381	183.922
galK	97.4487	0.384896	0.162273	2.3719	0.0176967	0.037971	0.186398	0.17908	1.04087	0.297937	0.44047	78.1456	86.4866	89.6973	112.69	76.0991	98.6783	118.599	103.46	113.183
galT	70.6328	0.12095	0.18373	0.658305	0.510342	0.618511	0.261983	0.199372	1.31404	0.188832	0.315286	56.9811	75.161	58.6908	84.8081	66.0861	80.3523	63.981	77.8853	71.7496
galU	571	-0.383701	0.096795	-3.96406	7.36853e-05	0.000264109	-0.359241	0.102345	-3.5101	0.000447946	0.00194002	669.121	682.627	677.713	546.024	512.668	514.537	545.789	449.875	540.649
gap	7617.21	-0.828667	0.14364	-5.76906	7.9717e-09	5.01667e-08	-0.617502	0.143888	-4.29154	1.77439e-05	0.000102622	10863.9	9979.94	10404.9	6819.5	6642.65	6594.53	4718.6	7397.94	5132.96
gatA	1503.33	-0.776836	0.0671381	-11.5707	5.80001e-31	2.4427e-29	-0.747697	0.0706667	-10.5806	3.66553e-26	2.36103e-24	2008.99	2061.26	2152.74	1239.59	1207.57	1243.35	1250.75	1183.39	1182.35
gatB	3042.83	-0.299671	0.0925561	-3.23773	0.00120486	0.00341351	-0.267206	0.0936368	-2.85364	0.00432218	0.013961	3490.5	3400.78	3494.87	2892.77	2795.64	2915.24	3035.2	2421.42	2939.04
gatC	556.462	-0.742135	0.128739	-5.76467	8.18173e-09	5.14392e-08	-0.647183	0.133004	-4.86588	1.13946e-06	8.21761e-06	739.127	786.616	726.437	484.451	438.571	493.391	373.353	537.06	429.15
gcl	24.8821	-0.0971481	0.267944	-0.362569	0.716927	0.795066	-0.59918	0.301786	-1.98544	0.0470951	0.105638	42.3288	24.7105	23.2549	12.7793	16.0209	23.9647	25.3583	27.8992	27.6219
gcp	373.048	-0.117505	0.1843	-0.637574	0.523751	0.630343	-0.112479	0.187859	-0.59874	0.549346	0.685639	323.978	426.256	435.198	399.643	292.381	397.532	425.24	260.393	396.812
gcvH	1066.73	0.356441	0.0724223	4.9217	8.57949e-07	4.14465e-06	-0.141405	0.0776603	-1.82081	0.0686357	0.143656	997.984	1042.99	972.274	917.786	863.124	943.082	1310.05	1262.44	1290.82
gcvP	2550.88	-0.239273	0.059301	-4.03489	5.46287e-05	0.000200061	-0.236727	0.0613955	-3.85578	0.000115363	0.000570732	2917.43	2828.32	2780.62	2423.42	2431.17	2371.1	2478.48	2350.51	2376.83
gcvT	2177.29	-0.0466323	0.0876492	-0.532033	0.594703	0.693503	-0.544744	0.0900072	-6.05223	1.42855e-09	1.58808e-08	2417.63	2423.68	2560.25	1756.57	1594.08	1691.63	2609.96	2165.68	2376.16
ggt	461.184	-0.279028	0.0995851	-2.8019	0.00508022	0.0125383	-0.178815	0.10563	-1.69284	0.0904852	0.179336	501.434	495.239	540.399	484.451	396.516	465.198	429.141	437.088	401.192
gidB	958.922	-0.762273	0.135803	-5.61308	1.98755e-08	1.18603e-07	0.0953221	0.13659	0.697869	0.485259	0.630319	1139.62	1048.14	1063.08	1104.83	1373.79	1007.93	556.713	741.654	594.545
glcB	5300.56	-0.0691485	0.099341	-0.696072	0.486384	0.59674	-0.456751	0.100127	-4.56173	5.07336e-06	3.25508e-05	6378.63	5611.33	5827	4339.15	4323.63	4245.99	5149.69	6470.3	5359.33
glf	3155.91	-0.999709	0.135651	-7.36969	1.71023e-13	1.91418e-12	-0.807798	0.136348	-5.92452	3.1321e-09	3.28721e-08	4910.15	4520.99	4415.1	2631.37	2671.48	2466.96	1925.67	2841.07	2020.44
glgB	14673.9	0.403994	0.0814852	4.95789	7.12644e-07	3.48369e-06	0.191722	0.0817602	2.34493	0.0190307	0.0499328	12749.1	12377.9	12916.4	14862.3	14504.9	14144.8	15678.1	18727.4	16104.6
glgC	11415.7	0.212356	0.082492	2.57427	0.0100453	0.0230762	0.48181	0.082721	5.82452	5.7278e-09	5.77173e-08	9458.87	9592.81	9781.44	13093	14324.7	13011.4	10828.8	12269.8	10380.8
glgX	37359.1	-0.26572	0.0888126	-2.99191	0.00277234	0.00730232	0.339559	0.0888585	3.82134	0.000132726	0.000648334	36717	36064.9	35708.4	46647.9	46650.8	44405.2	26699.2	33569.7	29768.3
glmM	1833.39	0.00660949	0.127549	0.0518192	0.958673	0.972588	-0.336276	0.12914	-2.60397	0.0092151	0.0268066	1719.2	2130.25	2063.04	1549.78	1429.86	1673.3	2185.5	1644.89	2104.66
glmS	2496.74	-1.0818	0.0781373	-13.8449	1.36664e-43	1.28269e-41	-0.457914	0.0791164	-5.78785	7.12942e-09	7.08628e-08	3371.66	3445.05	3428.43	2544.24	2517.28	2375.33	1689.25	1446.11	1653.27
glmU	948.974	-0.450076	0.0707749	-6.35926	2.02724e-10	1.56878e-09	-0.2058	0.0746747	-2.75596	0.00585204	0.0181873	1063.11	1131.53	1091.87	943.344	927.208	976.915	798.982	817.215	790.593
glnA	7365.75	-0.584938	0.107481	-5.44223	5.26188e-08	2.98279e-07	-0.473529	0.107859	-4.39024	1.13228e-05	6.80608e-05	9940.77	9160.38	8783.69	6773.03	6784.84	6394.35	5317.06	7071.29	6066.38
glnD	1095.32	0.508303	0.0859725	5.91239	3.37175e-09	2.24669e-08	0.164688	0.0896733	1.83653	0.0662793	0.139838	926.351	895.754	956.771	1119.93	927.208	1058.68	1288.59	1362.41	1322.15
glnT	21.4689	-0.671073	0.301259	-2.22756	0.0259099	0.0527185	-0.155441	0.315636	-0.49247	0.622387	0.744564	32.5607	24.7105	21.0401	25.5586	22.0287	19.7357	9.36307	24.4118	13.811
glpK	5879.92	-1.21996	0.11895	-10.2561	1.1114e-24	2.99259e-23	-0.844504	0.119331	-7.07699	1.47316e-12	2.46905e-11	10844.3	7778.65	8247.72	5145.41	4840.3	4761.93	3687.49	3873.34	3740.08
glpX	2467.21	0.268504	0.108155	2.48257	0.0130437	0.0291884	-0.274409	0.109744	-2.50045	0.0124035	0.034457	2427.4	2387.65	2503.77	2165.51	1956.55	1901.67	2622.83	3425.79	2813.73
gltA	7024.77	-0.76154	0.0658824	-11.5591	6.64175e-31	2.77938e-29	-0.127028	0.0662508	-1.91737	0.0551904	0.120506	8449.49	8500.4	8305.31	7559.53	7970.38	7589.77	4619.12	5106.72	5122.18
gltD	2050.44	0.169823	0.0992503	1.71105	0.0870713	0.149051	0.0236442	0.100807	0.23455	0.814558	0.885302	2095.28	2005.67	1777.34	2166.67	1786.33	2008.81	2212.42	2078.49	2322.94
gltX	3243.18	-0.972205	0.0603032	-16.122	1.78869e-58	3.6724e-56	-0.968787	0.0623189	-15.5456	1.70334e-54	4.86562e-52	4740.83	4833.98	4896.81	2446.65	2375.09	2537.44	2466.39	2526.04	2365.38
glyA	3992.03	-0.934961	0.0585191	-15.977	1.84757e-57	3.57017e-55	-0.584726	0.0596737	-9.79871	1.14028e-22	5.02796e-21	5466.93	5302.45	5668.65	3712.97	3634.73	3584.84	2898.65	2770.16	2888.85
glyS	3484.14	-0.460649	0.0630565	-7.30534	2.76575e-13	3.0285e-12	-0.350292	0.0644368	-5.43621	5.44251e-08	4.83207e-07	4135.2	4184.31	4172.59	3209.93	3364.38	3216.91	3010.62	3180.51	2882.79
gmhA	5.69278	0.159062	0.383549	0.41471	0.678354	0.762496	-0.0149242	0.391616	-0.0381093	0.969601	0.982916	9.7682	3.08881	4.4295	6.97053	6.00782	2.81938	6.24205	3.4874	8.42132
gmk	1713.99	-0.155739	0.102945	-1.51284	0.130321	0.208425	0.116317	0.10423	1.11596	0.264439	0.404886	1655.71	1715.32	1797.27	1932	1836.39	1842.46	1353.35	1768.11	1525.27
gnd	2399.3	0.302768	0.0902725	3.35393	0.00079672	0.00234729	-0.215382	0.0922166	-2.33561	0.0195114	0.0510177	2468.1	2203.35	2301.12	1978.47	2018.63	1991.89	2631.41	3196.79	2803.96
gpsA	1160.74	-0.931763	0.0934187	-9.97405	1.97982e-23	5.00285e-22	-0.756047	0.0963261	-7.84883	4.19941e-15	9.41641e-14	1540.12	1685.46	1737.47	972.388	905.179	1036.12	915.24	778.853	875.817
gpsI	15227	-0.505607	0.0789339	-6.40545	1.49929e-10	1.18679e-09	-0.245888	0.0791489	-3.10664	0.00189225	0.00689981	17848.1	17946	18075.7	15323.5	15738.5	14291.4	11496.3	13560.2	12763.7
greA	2062.97	-0.812965	0.127781	-6.36216	1.98942e-10	1.54282e-09	-0.300119	0.128508	-2.33541	0.0195221	0.0510183	2484.38	2546.21	2802.76	2065.6	2202.87	2060.97	1243.34	1793.69	1366.95
groEL	38429.6	-0.151911	0.0662796	-2.29197	0.0219075	0.0455626	-0.594084	0.0664603	-8.93894	3.92933e-19	1.31914e-17	47768.1	44468.5	42886.4	29779.2	29248.1	30209.6	40277.6	38920.6	42308.4
groES	5950.03	-0.593462	0.102578	-5.78547	7.23093e-09	4.59946e-08	-0.779669	0.103237	-7.55222	4.27912e-14	8.6771e-13	8882.55	7826.01	7251.09	4681.87	4708.13	4429.24	4892.21	5880.92	4998.22
grpE	2142.57	0.28944	0.153473	1.88594	0.059303	0.107839	-0.169957	0.154582	-1.09946	0.271566	0.411957	2398.09	1934.62	1853.74	1851.84	1846.4	1769.16	2131.27	3233.99	2263.99
guaA	1812.26	-0.497463	0.0911156	-5.45969	4.76956e-08	2.72014e-07	-0.576774	0.0932733	-6.1837	6.26146e-10	7.33294e-09	2315.06	2222.91	2343.2	1416.18	1580.06	1595.77	1739.97	1444.95	1652.26
guaB	3084.04	-0.616392	0.0737183	-8.36146	6.19489e-17	9.37798e-16	-0.708789	0.0753949	-9.40101	5.40412e-21	2.08854e-19	3951.24	4042.22	4298.83	2519.84	2435.17	2530.39	2836.23	2495.82	2646.65
gvpK	13.3857	0.00604542	0.33429	0.0180843	0.985572	0.989639	0.668119	0.345525	1.93363	0.0531581	0.117119	11.3962	8.23682	11.0737	15.1028	28.0365	15.5066	8.19269	10.4622	12.4635
gyrA	6529.53	-0.910013	0.0722179	-12.6009	2.0866e-36	1.28121e-34	-0.545573	0.0727673	-7.49749	6.50504e-14	1.27541e-12	9094.19	8883.41	8578.83	5965.61	6330.24	5844.57	4434.2	5024.19	4610.5
gyrB	5343.08	-0.997234	0.12151	-8.20701	2.26773e-16	3.25305e-15	-0.765924	0.121961	-6.28009	3.38371e-10	4.13985e-09	8470.65	7439.91	7284.31	4322.89	5024.54	4116.29	3449.51	4440.63	3538.97
hemA	3839.32	0.0187683	0.0650778	0.288398	0.773042	0.839696	-0.0611176	0.0663621	-0.920971	0.357066	0.503093	3770.52	3953.67	3897.96	3838.44	3688.8	3610.22	3868.9	4141.87	3783.53
hemB	2204.92	-0.780424	0.0629092	-12.4056	2.43798e-35	1.36902e-33	-0.303879	0.0644989	-4.71139	2.46037e-06	1.68032e-05	2739.98	2832.44	2735.21	2256.13	2294.99	2175.15	1632.3	1537.94	1640.14
hemC	5603.95	-0.797097	0.0869841	-9.16371	5.01418e-20	9.83379e-19	-0.383226	0.0874582	-4.38182	1.1769e-05	7.02933e-05	7418.94	7363.72	6818.1	5598.49	5631.33	5276.47	4370.99	3658.29	4299.25
hemD	5301.21	-0.402155	0.0827301	-4.86105	1.16765e-06	5.53098e-06	-0.310163	0.0834115	-3.71847	0.000200433	0.000937256	5668.81	6519.44	6457.1	5176.78	4678.09	5145.37	4689.34	4490.61	4885.37
hemE	562.937	-0.167129	0.086949	-1.92215	0.0545869	0.100543	-0.19156	0.0932119	-2.05511	0.0398687	0.0925246	579.58	592.022	659.995	520.466	544.709	541.321	544.619	528.923	554.796
hemG	331.933	-0.0832965	0.144774	-0.575355	0.565052	0.666856	-0.451642	0.152339	-2.96471	0.00302965	0.010292	335.375	371.687	417.48	292.762	256.334	262.202	395.59	276.667	379.296
hemH	2227.81	-0.0661641	0.0804917	-0.821999	0.411077	0.523204	-0.080218	0.0821827	-0.976095	0.329018	0.473733	2258.08	2274.39	2385.28	2243.35	2208.88	2089.16	2316.19	1997.12	2277.8
hemL	1199.42	0.933422	0.139215	6.70491	2.01531e-11	1.78204e-10	0.160667	0.141705	1.13381	0.256874	0.396723	831.925	914.287	905.832	967.741	911.187	1096.74	1969.37	1344.98	1852.69
hisB	2050.47	0.152731	0.0706051	2.16317	0.0305282	0.0609451	0.133668	0.0726257	1.84051	0.0656936	0.13887	2025.27	1822.4	1904.68	2004.03	2162.82	2146.96	2108.25	2104.07	2175.73
hisC	3752.88	0.302619	0.0752367	4.02222	5.7651e-05	0.000210076	0.151715	0.0763655	1.98669	0.0469563	0.105435	3405.84	3218.54	3460.54	3738.52	3804.96	3670.83	3999.2	4512.7	3964.76
hisD	2817.29	0.59116	0.084967	6.95752	3.46304e-12	3.33121e-11	0.266189	0.0864021	3.08081	0.00206436	0.00745211	2228.78	2219.82	2373.1	2835.84	2663.47	2720.7	3665.64	3086.35	3561.88
hisE	469.548	-0.471299	0.113745	-4.14346	3.42112e-05	0.000130149	0.146975	0.116736	1.25903	0.208018	0.340055	519.342	504.505	469.527	592.495	556.725	504.669	352.286	405.701	320.684
hisF	977.471	0.657416	0.101888	6.45234	1.10136e-10	8.87845e-10	0.369692	0.105092	3.51779	0.000435155	0.00189713	706.566	766.024	791.772	1021.18	923.202	995.241	1286.25	1050.87	1256.12
hisG	910.469	-0.270966	0.145247	-1.86555	0.0621038	0.112372	-0.178676	0.147213	-1.21372	0.224853	0.360137	926.351	1064.61	1044.25	877.124	837.09	955.77	974.54	628.895	885.586
hisH	1798.46	0.180893	0.0712537	2.53871	0.0111262	0.0253728	0.342508	0.0731688	4.68107	2.85379e-06	1.91908e-05	1660.59	1570.14	1525.96	2083.03	1986.59	1962.29	1831.26	1848.32	1717.95
hisI	370.074	0.483193	0.117137	4.12502	3.70704e-05	0.000140215	0.304484	0.123853	2.45844	0.0139543	0.0381841	296.302	289.318	327.783	340.394	370.483	425.726	438.504	389.427	452.73
hisS	981.585	0.0628802	0.114821	0.547639	0.58394	0.683987	-0.373543	0.118362	-3.15593	0.00159986	0.00591841	1004.5	1035.78	1106.27	851.566	720.939	835.946	1196.52	925.324	1157.43
hmgA	172.684	-0.437575	0.177498	-2.46524	0.0136922	0.030381	0.195746	0.181919	1.076	0.281925	0.422888	154.663	188.417	191.576	220.733	204.266	194.537	108.065	176.695	115.204
hpt	1552.14	0.0322853	0.0655719	0.492364	0.622462	0.716553	-0.0169994	0.0685984	-0.24781	0.804281	0.878054	1466.86	1592.8	1573.58	1514.93	1509.97	1560.53	1574.95	1604.21	1571.42
hrcA	1792.06	-0.330391	0.0690793	-4.78278	1.72891e-06	8.0162e-06	-0.334854	0.0716961	-4.67046	3.00529e-06	2.01272e-05	2189.7	2013.9	2035.35	1617.16	1724.25	1597.18	1661.56	1680.93	1608.47
hrpA	1128.23	-0.877768	0.081672	-10.7475	6.09057e-27	1.91459e-25	-0.531322	0.0845052	-6.28744	3.22739e-10	3.97077e-09	1442.44	1611.33	1503.81	1080.43	993.294	1064.32	860.232	771.879	826.3
hslR	382.295	0.334784	0.108465	3.08656	0.00202485	0.00548815	-0.223106	0.11814	-1.88849	0.05896	0.127507	350.027	379.923	373.185	307.865	326.425	311.541	515.749	418.488	457.446
hup	3811.4	-0.0526497	0.0652619	-0.806745	0.419814	0.532055	-0.0419048	0.0664686	-0.630445	0.528404	0.668389	3760.76	3970.15	3958.86	3889.55	3620.72	3838.58	3730.79	3617.6	3915.58
hutF	1022.39	0.281651	0.152651	1.84506	0.0650286	0.116891	-0.116771	0.154872	-0.753983	0.45086	0.598847	1139.62	922.524	867.074	1018.86	746.973	914.889	1080.65	1431	1079.95
hutH	1560.54	0.41379	0.106885	3.87137	0.000108226	0.000376614	-0.042418	0.10918	-0.388516	0.697634	0.80195	1603.61	1328.19	1316.67	1490.53	1285.67	1332.16	1797.71	2064.54	1825.74
hutI	1059.8	0.0862109	0.103104	0.836155	0.403068	0.514704	0.0316743	0.105801	0.299376	0.764653	0.850622	1128.23	1002.83	966.738	1173.37	925.205	1051.63	1073.63	1145.03	1071.53
hutU	3553.02	0.195798	0.135906	1.44069	0.149674	0.232857	-0.418785	0.13681	-3.06106	0.00220553	0.00789234	4525.93	3371.95	3169.3	3053.09	2411.14	2723.52	4187.24	4411.57	4123.41
hybA	86.9378	0.976322	0.205772	4.74467	2.08847e-06	9.59529e-06	0.392518	0.221859	1.76922	0.0768569	0.157502	65.1213	42.2137	69.7646	75.514	68.0887	91.6298	112.357	149.958	107.793
hybC	169.282	0.703654	0.150775	4.66691	3.05757e-06	1.37309e-05	0.107839	0.164576	0.655254	0.512304	0.654451	164.431	116.345	131.778	161.484	118.154	155.066	210.279	227.844	238.155
hydA	106.532	0.760342	0.185413	4.1008	4.11721e-05	0.000154926	0.853518	0.195181	4.37295	1.22579e-05	7.28818e-05	58.6092	74.1314	69.7646	119.661	140.183	128.282	108.456	154.608	105.098
hypA	151.664	-0.794668	0.151542	-5.2439	1.5722e-07	8.38422e-07	-0.434263	0.161423	-2.69022	0.00714057	0.0216023	218.156	182.24	191.576	141.734	150.196	139.559	101.823	140.659	99.0347
hypB	246.82	-0.525854	0.11688	-4.4991	6.82418e-06	2.89071e-05	-0.728389	0.129807	-5.6113	2.00807e-08	1.88741e-07	350.027	312.999	307.85	167.293	202.263	210.044	216.521	239.468	214.912
hypC	67.0693	-0.895249	0.193336	-4.63054	3.64722e-06	1.61362e-05	-0.851876	0.214721	-3.96736	7.26724e-05	0.00037389	107.45	98.8419	87.4826	52.2789	44.0574	56.3876	47.5956	67.4231	42.1066
hypD	247.449	-0.713057	0.128253	-5.55978	2.70115e-08	1.5831e-07	-0.84007	0.139769	-6.0104	1.85062e-09	2.00968e-08	393.984	319.177	323.353	196.336	202.263	167.753	187.261	224.356	212.554
hypE	170.055	-0.599594	0.131203	-4.56999	4.87745e-06	2.12358e-05	-1.04812	0.150777	-6.95143	3.61607e-12	5.69726e-11	231.181	237.838	256.911	117.337	100.13	121.233	164.244	132.521	169.1
hypF	321.192	-0.83243	0.11078	-7.51428	5.72263e-14	6.71387e-13	-0.873846	0.120946	-7.22512	5.00657e-13	8.84225e-12	504.69	468.469	413.051	252.101	216.282	269.251	253.973	256.905	256.008
ileS	6031.21	0.265835	0.0774758	3.4312	0.000600911	0.0018135	0.631622	0.0778877	8.10939	5.08731e-16	1.25182e-14	4838.51	4805.16	4784.96	7514.23	7824.19	7118.93	5400.93	6294.76	5699.21
ilvA	658.656	-0.723148	0.100666	-7.18363	6.78853e-13	7.10201e-12	-0.948064	0.107014	-8.85929	8.05246e-19	2.65852e-17	919.838	927.672	963.415	453.084	480.626	507.488	598.847	484.749	592.187
ilvB	3451.74	-0.625931	0.0778687	-8.03829	9.11006e-16	1.24435e-14	-0.0291332	0.0785134	-0.37106	0.710593	0.811597	3842.16	3961.91	4024.2	3994.11	4085.32	3518.59	2439.47	2636.48	2563.45
ilvC	10787.4	-0.606967	0.0669399	-9.06735	1.21949e-19	2.32909e-18	-0.580726	0.0674164	-8.61402	7.05429e-18	2.08769e-16	14422.7	13857.4	13539.9	9068.65	9562.45	9250.38	8724.04	9728.69	8932.32
ilvD	2959.8	-0.315883	0.0759576	-4.15868	3.20092e-05	0.000122624	-0.497086	0.0776385	-6.40256	1.52791e-10	1.96446e-09	3433.52	3670.53	3512.59	2608.14	2403.13	2481.05	2726.21	3067.75	2735.24
ilvE	3668.64	-0.134433	0.0645019	-2.08417	0.0371451	0.072352	-0.176542	0.0658608	-2.68053	0.00735063	0.0221632	3974.03	3858.95	3987.65	3482.94	3566.65	3402.99	3676.18	3367.67	3700.66
ilvH	1519.77	-0.71954	0.116501	-6.17627	6.56352e-10	4.73872e-09	-0.103946	0.117428	-0.885188	0.376055	0.523228	1846.19	1879.02	1676.56	1545.13	1994.6	1490.04	1021.36	1140.38	1084.67
infA	10288.9	-0.916681	0.196814	-4.6576	3.19918e-06	1.42887e-05	-0.155314	0.196868	-0.788926	0.430155	0.578057	13711.3	13135.7	11780.2	11072.7	13585.7	9764.92	4869.97	9221.86	5458.02
infB	10405.1	-0.528604	0.0639059	-8.2716	1.32171e-16	1.93399e-15	-0.109593	0.0642336	-1.70616	0.0879784	0.175529	11847.2	12264.6	11664	11188.9	11210.6	10746.1	8550.83	7737.39	8436.81
infC	7384.03	-0.441621	0.109676	-4.02658	5.65949e-05	0.000206686	-0.0813072	0.109944	-0.73953	0.459585	0.607296	8506.47	8161.66	8161.35	7832.55	8380.92	7231.71	5292.48	7041.07	5848.1
iscS	2334.95	-0.967639	0.110368	-8.76736	1.82905e-18	3.17067e-17	-0.205533	0.1109	-1.85333	0.0638352	0.135552	3044.42	3045.56	2772.86	2425.74	2909.79	2337.27	1364.67	1668.14	1446.11
ispD	3658.99	-1.5899	0.0794195	-20.019	3.76396e-89	2.47292e-86	-0.821518	0.0800204	-10.2664	9.98963e-25	5.33592e-23	5761.61	5742.09	5903.41	3093.75	3618.71	3095.68	1973.27	1889.01	1853.36
ispE	312.972	-0.0695506	0.132467	-0.525041	0.599555	0.697552	-0.325616	0.140603	-2.31585	0.0205666	0.0532188	322.35	351.095	357.682	291.6	228.297	291.806	363.209	273.18	337.526
ispF	668.479	-1.37137	0.101217	-13.5488	8.05077e-42	6.53007e-40	-0.927571	0.105183	-8.81863	1.15868e-18	3.73163e-17	973.563	1069.76	1127.31	606.436	478.623	555.418	405.343	390.589	409.276
ispG	3266.36	-0.266668	0.0614207	-4.34166	1.41408e-05	5.73134e-05	-0.199786	0.062919	-3.17529	0.00149689	0.00558464	3554	3606.7	3724.1	3266.85	3063.99	3132.33	2919.33	3113.09	3016.85
ispH	1830.47	-0.731913	0.061382	-11.9239	8.88525e-33	4.29236e-31	-0.233485	0.0632774	-3.68986	0.000224374	0.00103594	2147.37	2282.63	2287.83	1904.12	1914.49	1897.44	1338.14	1363.57	1338.65
katA	14243.9	-0.244184	0.103726	-2.35413	0.0185661	0.0395779	-0.00562045	0.103888	-0.054101	0.956855	0.975386	15222.1	14765.5	15181	15048.2	15488.2	14455	11204.9	14814.5	12015.5
katG	10396.9	0.740811	0.0767224	9.65574	4.64813e-22	1.08677e-20	0.423855	0.0771462	5.49418	3.92526e-08	3.56693e-07	7822.7	7762.17	7661.92	10870.5	10315.4	10084.9	11923.5	14026.3	13104.9
kdpA	179.105	2.26712	0.178793	12.6801	7.62221e-37	4.76933e-35	1.48943	0.188826	7.88786	3.07418e-15	7.06201e-14	58.6092	54.5689	58.6908	155.675	170.222	195.947	258.655	366.177	293.399
kdpB	142.894	2.33048	0.189636	12.2893	1.03444e-34	5.5707e-33	1.44213	0.20189	7.14311	9.12407e-13	1.55298e-11	56.9811	43.2433	35.436	119.661	120.156	155.066	223.543	291.779	240.176
kgd	9670.36	-0.0769213	0.12561	-0.612381	0.540286	0.645278	0.208698	0.125784	1.65918	0.0970805	0.189264	9834.94	9028.59	9145.8	10905.4	11278.7	10310.5	7538.05	10817.9	8173.39
ksgA	2091.44	-0.72086	0.0868343	-8.30155	1.0276e-16	1.51716e-15	-0.745169	0.0888417	-8.3876	4.96175e-17	1.34705e-15	2738.35	2927.16	2896.89	1642.72	1712.23	1724.05	1640.88	1928.53	1612.18
lepA	3096.96	-0.329185	0.0827996	-3.97568	7.01784e-05	0.000252666	-0.251813	0.0839588	-2.99924	0.00270651	0.00936377	3635.4	3519.18	3429.54	2955.5	3204.17	2717.88	2711	2991.03	2708.97
lepB	3748.39	-0.414867	0.068556	-6.0515	1.43507e-09	9.95607e-09	-0.333226	0.0697501	-4.77743	1.7755e-06	1.24451e-05	4208.46	4612.62	4446.11	3429.5	3714.84	3384.66	3226.75	3372.32	3340.23
leuA	5445.02	-0.876109	0.107415	-8.1563	3.45442e-16	4.87029e-15	0.177712	0.107513	1.65294	0.0983434	0.191215	6271.18	6316.61	5743.95	6532.54	7928.33	6333.74	3087.08	3628.06	3163.72
leuB	3113.99	-0.196052	0.0719545	-2.72466	0.00643677	0.0155077	-0.128727	0.0732604	-1.75712	0.0788978	0.160781	3254.44	3394.6	3416.25	3146.03	2971.87	3078.76	3014.91	2701.58	3047.51
leuC	580.593	-1.07153	0.0991223	-10.8101	3.08195e-27	1.0024e-25	-0.607014	0.103266	-5.87817	4.14823e-09	4.2852e-08	814.016	780.439	862.644	500.716	544.709	559.647	351.115	421.976	390.075
leuD	363.115	-1.1986	0.101619	-11.7951	4.13786e-32	1.8879e-30	-0.94668	0.110189	-8.59142	8.59045e-18	2.50841e-16	608.884	517.89	557.009	291.6	280.365	286.167	230.566	258.068	237.481
leuS	10401	0.842054	0.0566325	14.8688	5.25828e-50	7.05039e-48	0.956965	0.0570269	16.7809	3.36561e-63	1.30071e-60	6469.8	6645.06	6606.59	12864.1	13029	12537.8	11723	11402.6	12330.8
lexA	652.468	-0.299494	0.0766251	-3.90856	9.2848e-05	0.000327435	-0.28312	0.0828065	-3.41905	0.00062839	0.00260969	739.127	763.965	729.76	611.083	608.793	611.805	597.676	590.534	619.472
lgt	119.346	1.07417	0.194581	5.52042	3.38194e-08	1.96458e-07	0.895721	0.2042	4.3865	1.15192e-05	6.9115e-05	76.5175	73.1018	57.5835	140.572	110.143	149.427	139.276	196.457	131.036
ligA	1322	0.150134	0.0971623	1.54519	0.122301	0.197696	-0.12111	0.0999019	-1.21229	0.225402	0.360832	1279.63	1300.39	1353.21	1277.93	1053.37	1270.13	1514.09	1328.7	1520.55
ligB	181.806	-0.520031	0.134249	-3.87362	0.000107232	0.000373749	-0.200668	0.143428	-1.39909	0.161787	0.279846	205.132	215.187	223.69	200.983	176.23	179.031	157.612	119.734	158.658
ligC	272.589	-0.144966	0.107252	-1.35164	0.176489	0.266621	-0.168228	0.117379	-1.43321	0.151799	0.26722	314.21	274.904	290.132	261.395	270.352	246.696	252.413	282.48	260.724
ligD	238.87	-0.357804	0.11406	-3.13698	0.00170698	0.00470422	-0.0481398	0.122434	-0.393192	0.694178	0.799717	250.717	264.608	264.662	250.939	242.316	260.793	195.454	229.006	191.332
lipA	2515.24	-0.548283	0.0879433	-6.23451	4.53205e-10	3.36108e-09	-0.562235	0.0894931	-6.28244	3.333e-10	4.08541e-09	3363.52	3168.09	3079.61	2216.63	2208.88	2048.28	2043.49	2422.58	2086.13
lipB	798.758	-0.0972464	0.117164	-0.830002	0.406537	0.518631	-0.553521	0.121635	-4.55066	5.34777e-06	3.41446e-05	830.297	943.116	986.67	664.523	540.704	652.686	928.895	750.954	890.975
lipP	290.356	-0.475751	0.112363	-4.23407	2.29499e-05	9.01261e-05	0.0444822	0.118034	0.37686	0.706278	0.809045	286.534	321.236	344.393	343.879	308.402	331.277	227.055	209.244	241.187
lon	451.154	0.702681	0.0967997	7.25912	3.89608e-13	4.21701e-12	0.428717	0.10391	4.12587	3.69344e-05	0.000200544	364.679	348.006	306.743	477.481	448.584	445.462	551.641	573.097	544.691
lpdA	3381.92	-0.186647	0.0662828	-2.81592	0.00486379	0.012054	-0.130531	0.0676074	-1.93072	0.0535173	0.117566	3768.9	3537.71	3601.18	3309.84	3506.57	3145.02	3258.35	3166.56	3143.17
lppH	1064.32	-0.0955398	0.093467	-1.02218	0.306697	0.415464	-0.216647	0.0967828	-2.23849	0.0251894	0.0629016	1113.57	1172.72	1135.06	984.006	1077.4	885.285	1013.16	1157.82	1039.86
lspA	1122.29	0.458479	0.10193	4.498	6.85967e-06	2.90092e-05	-0.361258	0.106243	-3.40031	0.000673107	0.00276914	1009.38	1094.47	1099.62	842.272	793.033	845.814	1596.79	1271.74	1547.5
ltaE	115.473	0.0188868	0.146666	0.128774	0.897536	0.930097	-0.458879	0.168083	-2.73007	0.00633204	0.0193946	118.846	121.493	141.744	101.073	74.0965	94.4492	136.545	126.709	124.299
ltrA	116.636	-0.0896382	0.15476	-0.579208	0.562449	0.664262	0.341227	0.164399	2.0756	0.0379308	0.0888748	104.194	114.286	108.523	130.116	142.185	149.427	103.774	83.6977	113.519
lys1	49.9806	-1.2192	0.26286	-4.6382	3.5145e-06	1.56227e-05	-1.00768	0.277552	-3.63059	0.00028277	0.00127508	60.2372	91.6346	94.1268	30.2056	54.0704	29.6035	36.2819	16.2745	37.3906
lysA	2124.21	-1.07361	0.0882788	-12.1616	4.97917e-34	2.63816e-32	-0.785165	0.0898491	-8.73871	2.35789e-18	7.30724e-17	3096.52	3205.15	3044.17	1801.88	1874.44	1712.77	1547.64	1291.5	1543.8
lysS	1985.31	-0.716341	0.0690943	-10.3676	3.4826e-25	9.6543e-24	-0.558809	0.0713486	-7.83209	4.79825e-15	1.0621e-13	2669.97	2567.83	2585.72	1713.59	1908.49	1683.17	1585.48	1567.01	1586.58
maf	1728.39	-1.17254	0.145139	-8.07872	6.54502e-16	9.0528e-15	-1.47184	0.147151	-10.0023	1.48964e-23	6.89219e-22	3243.04	3068.22	2445.08	973.55	1043.36	1022.03	1463.37	991.585	1305.3
malQ	5543.88	0.541526	0.0927599	5.83794	5.28513e-09	3.42777e-08	0.207623	0.093437	2.22206	0.0262793	0.0651283	4171.02	4570.41	5038.55	5535.76	5034.56	5377.97	6723.08	6259.89	7183.72
manA	1279.43	-0.0449307	0.0769487	-0.583905	0.559284	0.661356	0.207593	0.0793167	2.61727	0.00886353	0.0259276	1185.21	1256.12	1244.69	1468.46	1413.84	1382.91	1244.51	1105.51	1213.68
manB	2424.27	-0.00798525	0.0975278	-0.0818766	0.934745	0.956436	0.165116	0.0985641	1.67521	0.0938926	0.184417	2302.04	2270.27	2431.79	2718.5	2515.28	2630.48	2473.41	1997.12	2479.57
map	3406.32	-0.344527	0.0574406	-5.99797	1.99797e-09	1.36452e-08	-0.222319	0.0589293	-3.77264	0.00016153	0.000774635	3777.04	3880.57	3942.25	3427.17	3270.26	3235.24	3099.18	3007.3	3017.86
mce	2268.78	0.0541401	0.0962881	0.562272	0.573931	0.674669	-0.626246	0.0985838	-6.35242	2.11954e-10	2.67796e-09	2617.88	2374.26	2620.05	1634.59	1540.01	1715.59	2637.27	2914.31	2365.04
mdcB	41.4827	-1.14596	0.236971	-4.83587	1.32565e-06	6.24338e-06	-0.238344	0.246177	-0.968179	0.332955	0.478459	43.9569	64.865	57.5835	39.4996	42.0548	59.207	26.1386	15.1121	24.9271
mdcC	25.6134	-2.00089	0.269836	-7.4152	1.21445e-13	1.39006e-12	-0.456526	0.269845	-1.69181	0.0906821	0.179656	35.8167	41.1841	42.0802	25.5586	36.0469	25.3744	7.41243	9.29974	7.74761
mdcG	16.5772	-1.58363	0.321386	-4.92751	8.32838e-07	4.03224e-06	-0.96206	0.337627	-2.84948	0.0043791	0.0141379	24.4205	25.7401	36.5433	6.97053	24.0313	9.86783	8.58282	6.97481	6.06335
mdcH	34.0353	-1.11541	0.240838	-4.63138	3.63244e-06	1.60925e-05	-1.24586	0.273451	-4.55609	5.21157e-06	3.33723e-05	52.097	49.4209	69.7646	22.0733	18.0235	22.555	29.2596	23.2494	19.8743
menA	114.201	0.0207737	0.148739	0.139666	0.888924	0.923941	-0.383989	0.168997	-2.27217	0.0230763	0.0585599	110.706	125.612	133.992	87.1316	106.138	91.6298	134.984	109.272	128.341
menB	944.573	-0.430794	0.0769108	-5.60122	2.12846e-08	1.26209e-07	-0.575819	0.0820119	-7.02116	2.20034e-12	3.56065e-11	1146.13	1134.62	1246.9	795.802	815.062	749.955	883.64	878.826	850.216
metE	765.005	0.235347	0.129483	1.81759	0.0691276	0.123047	0.336814	0.131886	2.55383	0.0106546	0.0302771	716.334	635.265	638.955	843.434	915.192	772.51	694.038	945.086	724.233
metG	1411.72	-0.801283	0.112182	-7.14272	9.15004e-13	9.43733e-12	-0.35082	0.113536	-3.08993	0.00200201	0.00725493	1885.26	1717.38	1806.13	1466.13	1413.84	1336.39	911.729	1211.29	957.335
metH	6042.43	-0.81451	0.0711138	-11.4536	2.25557e-30	9.03603e-29	-0.206955	0.0715325	-2.89316	0.00381391	0.0125727	7596.4	7372.99	7389.51	6267.66	6764.81	6322.46	4042.12	4542.92	4082.99
metK	3976.49	-0.0575164	0.0726347	-0.791859	0.428443	0.540489	0.0400382	0.0735875	0.54409	0.58638	0.717682	3734.71	4102.97	4128.29	4191.61	4031.25	4088.1	3611.81	4007.03	3892.67
metX	822.867	-0.422642	0.0934327	-4.52349	6.0829e-06	2.59511e-05	0.142071	0.09569	1.4847	0.137622	0.248264	774.943	879.281	936.838	915.462	1025.34	938.853	627.326	668.419	639.346
metZ	3077.04	0.349579	0.0604238	5.78545	7.23172e-09	4.59946e-08	0.121644	0.0622455	1.95427	0.0506698	0.112391	2705.79	2824.2	2697.56	3008.94	3094.03	2863.08	3482.67	3467.64	3549.42
mfd	4285.65	-0.786903	0.0918406	-8.56814	1.05173e-17	1.70614e-16	-0.243578	0.0923283	-2.63817	0.00833541	0.024635	5162.49	5516.61	5274.42	4400.72	4822.28	4230.48	3282.93	2717.85	3163.05
mgtE	142.805	0.255216	0.141004	1.80999	0.0702968	0.124622	0.096064	0.154952	0.619959	0.535285	0.673978	138.383	119.434	138.422	135.925	132.172	153.656	165.024	137.171	165.058
mhpA	16.5917	0.585788	0.306858	1.90899	0.0562639	0.103155	0.333752	0.332166	1.00478	0.315005	0.457873	14.6523	10.296	12.1811	16.2646	18.0235	15.5066	15.6051	25.5743	21.2217
mhpB	0.816673	0.102252	0.299461	0.341453	0.732763	NA	-0.0660443	0.275615	-0.239625	0.810621	NA	0	0	2.21475	0	0	1.40969	0.390128	2.32494	1.01056
miaA	137.788	0.0477437	0.178463	0.267528	0.789063	0.852491	-0.243144	0.190592	-1.27574	0.202049	0.332614	151.407	152.381	132.885	145.219	92.12	121.233	176.338	116.247	152.257
miaB	2560.9	0.104114	0.0642869	1.61953	0.105334	0.174671	0.300015	0.0657607	4.56222	5.06146e-06	3.25379e-05	2365.53	2304.25	2293.37	2812.61	3007.92	2771.45	2425.43	2577.19	2490.35
mmsA	2999.21	-0.995024	0.304816	-3.26434	0.00109718	0.00314231	-0.923515	0.304996	-3.02796	0.00246214	0.00864118	5396.93	4231.67	4664.26	1301.16	3424.46	1819.91	1790.3	2458.62	1905.58
mmsB	694.093	-0.556927	0.087858	-6.33895	2.3134e-10	1.77975e-09	-0.576684	0.0934203	-6.173	6.70042e-10	7.76398e-09	895.418	946.205	829.423	618.053	570.743	587.841	616.402	564.959	617.788
mnmA	1197.33	-0.769661	0.135859	-5.66515	1.46895e-08	8.96103e-08	-0.493547	0.137402	-3.592	0.00032815	0.00145968	1343.13	1662.81	1725.29	1176.86	991.291	1154.54	996.387	747.467	978.22
moaA	576.977	0.0151898	0.0909335	0.167043	0.867337	0.908112	0.289277	0.0951673	3.03966	0.00236843	0.00837041	478.642	560.104	561.439	649.421	640.835	679.47	535.646	530.085	557.154
moaC	1511.82	0.412065	0.0920846	4.47486	7.64621e-06	3.21156e-05	-0.300946	0.0954555	-3.15274	0.00161747	0.0059802	1387.08	1412.61	1530.39	1179.18	1091.42	1229.25	2087.19	1753	1936.23
moaE	577.782	0.360767	0.177552	2.0319	0.0421642	0.0806615	-0.164117	0.180966	-0.906889	0.364465	0.510796	437.941	617.762	575.835	505.363	444.579	497.62	842.677	504.511	773.751
modA	104.4	0.196095	0.149111	1.31509	0.188479	0.281115	0.371225	0.162833	2.27979	0.0226204	0.0576478	89.5418	87.5162	95.2342	124.308	110.143	119.824	102.604	102.297	108.13
modB	59.6486	0.379634	0.194014	1.95673	0.050379	0.0937384	0.238987	0.214111	1.11618	0.264343	0.404833	42.3288	54.5689	54.2613	56.926	50.0652	74.7136	70.2231	69.7481	64.002
moxR	7209.46	0.188625	0.112123	1.68231	0.0925093	0.15701	0.172163	0.112466	1.5308	0.125818	0.231678	6464.92	6361.92	6995.28	7523.52	7463.72	7405.1	6664.17	8988.2	7018.33
mqo	4492.45	-0.403462	0.0646026	-6.2453	4.22983e-10	3.15437e-09	-0.524081	0.0658826	-7.95478	1.79454e-15	4.19578e-14	5644.39	5297.31	5567.88	3711.8	3949.14	3794.88	4100.64	4355.77	4010.23
mraW	3930.27	-0.210447	0.105361	-1.99739	0.0457832	0.0863363	0.119295	0.105878	1.12672	0.259862	0.400115	3951.24	4094.73	3937.82	4286.87	4579.97	4175.5	3133.9	4037.25	3175.17
mraY	1369.49	0.161063	0.107954	1.49196	0.135711	0.215471	0.0468667	0.11001	0.426022	0.670092	0.781972	1261.73	1312.74	1337.71	1401.08	1287.68	1353.3	1597.18	1221.75	1552.22
mraZ	12641.2	-0.3124	0.0740186	-4.22056	2.43695e-05	9.5302e-05	-0.134704	0.0743072	-1.8128	0.0698631	0.145761	13592.4	14508.1	13815.6	12217	13870.1	12079.6	11220.1	10988.8	11479.3
mscL	54.92	0.135609	0.194564	0.696989	0.48581	0.59633	-0.069614	0.21833	-0.318848	0.749842	0.839976	48.841	60.7466	50.9392	49.9554	48.0626	54.9779	52.6673	65.0982	62.9915
MSMEG_0002	2111.43	-0.27118	0.0637132	-4.25625	2.0788e-05	8.22259e-05	0.150558	0.0652453	2.30757	0.0210231	0.054208	2103.42	2201.29	2160.49	2338.61	2461.21	2393.65	1831.26	1711.15	1801.82
MSMEG_0004	269.32	-0.0408457	0.159059	-0.256796	0.797336	0.857926	-0.12897	0.165515	-0.779201	0.435861	0.583391	268.625	294.466	282.38	271.85	212.276	281.938	311.322	204.594	296.43
MSMEG_0007	1123.57	-0.46021	0.111081	-4.14303	3.42749e-05	0.000130316	-0.314238	0.113287	-2.77381	0.00554043	0.0173254	1240.56	1362.16	1410.79	1164.08	985.283	1060.09	1043.2	827.677	1018.31
MSMEG_0008	12.696	0.0142723	0.335766	0.0425068	0.966095	0.978305	0.744176	0.34606	2.15043	0.0315216	0.0760826	9.7682	12.3552	6.64424	17.4263	14.0183	25.3744	10.9236	6.97481	10.7793
MSMEG_0009	170.608	-0.789378	0.174256	-4.53	5.89841e-06	2.52954e-05	-0.296784	0.180321	-1.64587	0.0997915	0.19363	203.504	245.045	199.327	157.999	196.256	171.982	153.32	104.622	103.414
MSMEG_0010	18.6885	-0.0577908	0.328159	-0.176106	0.860211	0.902233	0.159124	0.34102	0.466611	0.640778	0.759006	8.14016	19.5625	25.4696	23.2351	22.0287	18.326	25.3583	13.9496	12.1267
MSMEG_0011	408.09	-0.478088	0.124174	-3.85014	0.000118052	0.000407355	0.600009	0.125342	4.78696	1.69325e-06	1.1962e-05	335.375	420.078	372.078	544.863	664.866	534.272	280.112	245.281	275.882
MSMEG_0012	90.385	0.154775	0.168617	0.917912	0.358665	0.471191	0.493799	0.18015	2.74105	0.00612433	0.0188817	65.1213	87.5162	75.3014	121.984	106.138	101.498	92.4604	77.8853	85.5606
MSMEG_0013	83.5754	0.756327	0.172703	4.37935	1.19034e-05	4.86955e-05	0.482256	0.190541	2.53098	0.0113745	0.0319839	52.097	62.8058	65.3351	91.7786	74.0965	91.6298	101.433	98.8098	114.193
MSMEG_0014	37.4974	0.962817	0.237118	4.06049	4.89699e-05	0.000181053	0.681975	0.259781	2.62519	0.00866007	0.0253965	17.9084	22.6513	27.6844	41.8232	38.0496	39.4713	44.0845	56.9609	48.8436
MSMEG_0015	93.134	0.393253	0.167656	2.34559	0.0189969	0.0404176	0.0583232	0.186308	0.313047	0.754245	0.842754	70.0054	86.4866	89.6973	97.5874	72.0939	85.9911	106.895	126.709	102.74
MSMEG_0016	9.52516	0.443	0.364695	1.21472	0.224475	0.323776	0.219843	0.378961	0.580119	0.561834	0.696463	3.25607	8.23682	9.96637	8.13228	18.0235	4.22907	10.9236	8.13727	14.8215
MSMEG_0017	39.014	0.833747	0.237389	3.51215	0.000444496	0.00139196	0.574934	0.25863	2.223	0.0262159	0.0650447	17.9084	28.8289	31.0065	45.3084	32.0417	46.5198	55.7883	41.8488	51.8753
MSMEG_0018	54.9144	0.811411	0.244112	3.32393	0.000887599	0.00258949	0.169745	0.263033	0.645338	0.518708	0.660321	34.1887	38.0953	50.9392	40.6614	32.0417	67.6651	94.8011	65.0982	70.7391
MSMEG_0019	654.714	0.911873	0.0961153	9.48728	2.37133e-21	5.24567e-20	0.743767	0.100547	7.3972	1.3909e-13	2.59609e-12	376.076	424.196	478.386	751.655	714.931	703.435	806.785	816.052	820.91
MSMEG_0020	209.701	0.559775	0.12558	4.45751	8.29159e-06	3.45878e-05	-0.346454	0.143117	-2.42078	0.0154874	0.0417359	198.62	192.536	189.361	157.999	124.162	163.524	311.322	281.317	268.472
MSMEG_0022	82.9825	0.618376	0.172997	3.57448	0.000350919	0.00111756	0.478382	0.189787	2.52062	0.0117147	0.0327791	63.4933	68.9834	54.2613	99.9109	80.1043	83.1717	93.6307	106.947	96.3399
MSMEG_0023	233.024	0.915399	0.147801	6.19346	5.88573e-10	4.27757e-09	0.130582	0.159206	0.820206	0.412099	0.559861	149.779	185.328	184.931	195.175	142.185	231.189	352.286	320.841	335.505
MSMEG_0024	6208.23	-0.545256	0.0713018	-7.64716	2.05461e-14	2.49977e-13	-0.773295	0.0722622	-10.7012	1.00438e-26	6.66541e-25	8312.73	8177.1	8165.78	4830.57	4898.38	4632.24	5243.71	6056.46	5557.06
MSMEG_0025	315.092	-0.404454	0.105918	-3.81854	0.000134242	0.000458642	-0.261914	0.114102	-2.29543	0.0217083	0.0557123	343.515	376.835	374.292	279.983	326.425	311.541	262.166	269.693	291.378
MSMEG_0026	360.439	-0.385895	0.166038	-2.32414	0.0201181	0.0423913	-0.182483	0.169859	-1.07432	0.282681	0.423717	408.636	391.249	427.446	313.674	422.55	343.964	244.61	396.402	295.42
MSMEG_0027	232.243	-0.202464	0.110841	-1.82662	0.0677574	0.120871	-0.0967158	0.121159	-0.798256	0.424722	0.572747	227.925	250.193	265.77	227.704	222.29	246.696	216.521	220.869	212.217
MSMEG_0028	3116.57	-0.408145	0.0897374	-4.54822	5.4102e-06	2.33235e-05	-0.0196323	0.0905024	-0.216926	0.828266	0.894429	3272.35	3521.24	3457.22	3460.87	3424.46	3229.6	2754.3	2259.84	2669.22
MSMEG_0029	393.751	-0.0971365	0.0992619	-0.978588	0.327784	0.438237	-0.11326	0.106762	-1.06087	0.288749	0.43047	387.472	420.078	434.091	383.379	356.464	405.991	388.177	361.527	406.581
MSMEG_0031	1529.14	-0.375407	0.0712226	-5.27089	1.35761e-07	7.32309e-07	0.219238	0.0727675	3.01286	0.00258802	0.00900598	1491.28	1585.59	1605.69	1850.67	1814.36	1798.76	1145.81	1260.12	1209.97
MSMEG_0032	1274.3	-0.274261	0.0839937	-3.26525	0.00109366	0.00313361	0.0403085	0.0861307	0.467992	0.63979	0.758193	1323.59	1346.72	1343.24	1402.24	1415.84	1313.83	1009.65	1191.53	1122.06
MSMEG_0033	1487.31	-0.285539	0.0959574	-2.97569	0.00292333	0.00762153	-0.0663509	0.0977055	-0.679091	0.49708	0.640482	1525.47	1604.12	1703.14	1639.24	1381.8	1584.49	1417.34	1214.78	1315.41
MSMEG_0034	919.027	-0.393013	0.0869046	-4.52235	6.11579e-06	2.60744e-05	-0.23038	0.090339	-2.55017	0.0107672	0.03052	1019.15	1071.82	1083.01	900.359	861.122	937.444	820.049	725.38	852.911
MSMEG_0035	2588.81	-0.489406	0.0724168	-6.75819	1.3973e-11	1.25757e-10	-0.281123	0.0738777	-3.80524	0.000141665	0.000685375	2860.45	3123.81	3211.38	2610.46	2477.23	2469.78	2157.41	2272.62	2116.11
MSMEG_0036	5.4052	-0.797167	0.38728	-2.05837	0.0395543	0.0763206	-0.64103	0.391868	-1.63583	0.101875	0.19657	8.14016	14.4144	3.32212	2.32351	4.00522	5.63876	3.12102	4.64987	3.03167
MSMEG_0037	1.65272	-0.168652	0.367657	-0.458721	0.646435	0.736086	-0.024989	0.350449	-0.0713057	0.943154	0.967888	1.62803	2.05921	2.21475	1.16175	0	4.22907	1.56051	0	2.02112
MSMEG_0038	80.1574	0.288263	0.180563	1.59647	0.110384	0.181351	0.595453	0.19251	3.0931	0.00198078	0.00718992	60.2372	62.8058	66.4424	99.9109	110.143	87.4008	89.3393	74.3979	70.7391
MSMEG_0039	3.10071	0.160317	0.3908	0.410227	0.681639	0.765566	0.0616131	0.383724	0.160566	0.872435	0.925381	0	5.14801	2.21475	2.32351	6.00782	1.40969	3.12102	4.64987	3.03167
MSMEG_0040	2.58723	-0.405328	0.388449	-1.04345	0.296739	0.40498	-0.185144	0.377958	-0.489855	0.624236	0.746357	4.8841	3.08881	2.21475	2.32351	2.00261	2.81938	0.780256	3.4874	1.68426
MSMEG_0041	2.50487	0.0926949	0.389188	0.238175	0.811745	0.868221	-0.00772295	0.378625	-0.0203974	0.983726	0.992118	3.25607	3.08881	1.10737	3.48526	2.00261	1.40969	3.51115	2.32494	2.35797
MSMEG_0042	85.8737	-0.280998	0.184486	-1.52314	0.127723	0.20532	-0.158664	0.19861	-0.798874	0.424364	0.572499	91.1698	115.316	79.7309	80.161	84.1095	91.6298	90.8998	67.4231	72.4233
MSMEG_0043	191.902	-0.703123	0.126431	-5.56133	2.6772e-08	1.57187e-07	-0.190737	0.134497	-1.41815	0.156148	0.273206	227.925	237.838	231.441	202.145	196.256	210.044	157.612	134.846	129.015
MSMEG_0044	689.562	-0.334943	0.130259	-2.57136	0.0101301	0.0232384	-0.233272	0.133254	-1.75059	0.0800173	0.16281	784.712	736.166	841.604	700.538	594.775	699.206	702.621	501.024	645.41
MSMEG_0045	801.337	-0.346167	0.148738	-2.32736	0.0199459	0.042123	-0.242241	0.150918	-1.60512	0.108468	0.20674	884.022	936.938	937.946	841.11	670.874	800.704	843.847	541.71	754.887
MSMEG_0046	344.112	-0.483485	0.108241	-4.46675	7.94185e-06	3.32344e-05	-0.0282771	0.113674	-0.248755	0.803551	0.877548	408.636	397.427	344.393	378.732	404.527	345.374	277.381	280.155	260.387
MSMEG_0047	417.863	0.403891	0.137401	2.9395	0.00328739	0.00846322	0.457498	0.141523	3.23267	0.00122637	0.00468755	309.326	321.236	374.292	451.922	464.605	482.114	411.585	547.522	398.16
MSMEG_0048	220.076	0.0760205	0.12908	0.588939	0.555902	0.658661	0.255137	0.137059	1.86152	0.0626707	0.133582	227.925	198.713	187.146	269.527	200.261	253.744	210.669	212.732	219.965
MSMEG_0049	123.054	-0.178934	0.149941	-1.19336	0.232727	0.333555	-0.0938923	0.163486	-0.574313	0.565756	0.699213	128.615	138.996	124.026	137.087	122.159	105.727	111.577	132.521	106.782
MSMEG_0050	40.3663	-0.471343	0.255071	-1.84789	0.0646187	0.11625	0.0371221	0.266844	0.139115	0.889359	0.936392	53.7251	37.0657	43.1876	38.3379	50.0652	49.3391	39.7931	30.2242	21.5586
MSMEG_0051	39.4192	1.00376	0.254034	3.95129	7.77315e-05	0.00027695	1.31487	0.265851	4.94591	7.57908e-07	5.58861e-06	13.0243	22.6513	21.0401	48.7937	64.0835	57.7973	46.8154	31.3866	49.1805
MSMEG_0052	423.446	-0.536373	0.182375	-2.94104	0.00327113	0.00842467	0.0682734	0.184155	0.370739	0.710832	0.811638	454.221	498.328	448.486	480.966	510.665	483.524	379.985	198.782	356.053
MSMEG_0053	506.113	0.583043	0.0953011	6.1179	9.48143e-10	6.69817e-09	0.296226	0.101942	2.90582	0.00366294	0.0121607	398.868	414.93	405.299	523.951	438.571	531.453	594.555	626.57	620.819
MSMEG_0054	18.3157	-0.460411	0.27726	-1.66058	0.0967982	0.16285	-0.658664	0.31254	-2.10745	0.0350782	0.0832438	24.4205	27.7993	21.0401	16.2646	10.013	14.0969	16.7755	18.5995	15.8321
MSMEG_0055	88.0902	-1.07221	0.156561	-6.84854	7.46073e-12	6.95277e-11	-0.833431	0.176296	-4.72744	2.2737e-06	1.56585e-05	143.267	133.848	119.596	78.9993	70.0913	64.8457	58.9093	61.6108	61.644
MSMEG_0056	119.105	0.295767	0.159204	1.85778	0.0632006	0.114105	0.631233	0.168585	3.74431	0.000180889	0.000850711	89.5418	90.605	98.5563	154.513	134.175	150.837	116.648	136.009	101.056
MSMEG_0057	494.939	0.0866396	0.111473	0.777227	0.437025	0.548022	0.167778	0.116131	1.44473	0.148535	0.262968	465.617	469.499	456.238	507.687	538.702	522.995	463.082	578.909	451.719
MSMEG_0058	162.977	-0.308868	0.125693	-2.45732	0.0139976	0.0309958	0.0720625	0.135773	0.530757	0.595587	0.724899	182.34	166.796	166.106	182.395	164.214	190.308	138.105	144.146	132.383
MSMEG_0059	939.759	-0.0783076	0.0925324	-0.846272	0.397401	0.508556	-0.145218	0.0961209	-1.51079	0.130843	0.238921	963.795	1028.57	978.919	937.536	769.002	965.637	950.742	936.949	926.682
MSMEG_0060	909.147	-0.143886	0.0875634	-1.64322	0.100336	0.167823	0.00388644	0.0908555	0.042776	0.96588	0.980818	950.771	940.027	924.657	947.991	855.114	1010.75	804.834	906.725	841.458
MSMEG_0061	1584.58	-0.149522	0.112325	-1.33115	0.183139	0.27496	0.0762993	0.113644	0.671386	0.501974	0.645269	1735.48	1621.62	1468.38	1819.31	1658.16	1608.46	1314.34	1668.14	1367.29
MSMEG_0062	1008.39	-0.111803	0.104489	-1.07	0.284618	0.391857	0.029027	0.106926	0.271468	0.786031	0.866771	1108.69	985.33	987.778	1123.42	1067.39	948.721	889.492	1057.85	906.807
MSMEG_0063	263.747	-0.471822	0.119182	-3.95885	7.53124e-05	0.000269207	-0.229056	0.127092	-1.80229	0.0715004	0.148329	327.235	280.052	316.709	268.365	264.344	249.515	216.131	249.931	201.438
MSMEG_0064	593.932	-0.677144	0.104949	-6.45214	1.10281e-10	8.87925e-10	-0.413105	0.109144	-3.78495	0.000153741	0.00074107	776.572	770.143	715.364	537.892	604.788	551.189	503.655	401.051	484.731
MSMEG_0065	1427.05	-0.796837	0.137512	-5.79469	6.8448e-09	4.38307e-08	-0.77193	0.139195	-5.54566	2.92855e-08	2.69854e-07	2287.39	1913	1796.16	1161.75	1189.55	1096.74	1046.32	1378.69	973.841
MSMEG_0066	817.646	-0.453884	0.0867507	-5.23205	1.67643e-07	8.88237e-07	-0.769886	0.092748	-8.30083	1.03386e-16	2.68477e-15	1090.78	1093.44	1005.5	623.862	654.853	580.792	764.651	725.38	819.563
MSMEG_0067	1124.84	-0.457544	0.0874428	-5.23249	1.67241e-07	8.86821e-07	-0.638147	0.0913405	-6.98646	2.81917e-12	4.49562e-11	1481.51	1369.37	1440.69	1009.56	821.069	895.153	1037.74	1009.02	1059.4
MSMEG_0068	936.485	-0.46629	0.0816953	-5.70768	1.14528e-08	7.04538e-08	-0.529014	0.0862327	-6.13473	8.53021e-10	9.71291e-09	1198.23	1177.87	1126.2	836.463	807.051	769.691	847.748	778.853	886.259
MSMEG_0069	2064.42	-0.954332	0.179943	-5.30352	1.13593e-07	6.19856e-07	-0.183044	0.18025	-1.0155	0.309867	0.452576	2954.88	2450.45	2427.36	2166.67	2665.47	2018.68	1040.08	1750.68	1105.55
MSMEG_0070	304.423	-0.530185	0.1276	-4.15507	3.25191e-05	0.000124215	-0.274636	0.133908	-2.05093	0.0402741	0.0932679	361.423	364.479	362.111	306.703	298.389	288.986	214.961	302.242	240.513
MSMEG_0071	2595.78	-0.647538	0.136398	-4.74742	2.06031e-06	9.4725e-06	-0.18956	0.136945	-1.38421	0.166295	0.285935	3288.63	3150.58	2891.35	2689.46	2957.85	2502.2	1616.3	2400.5	1865.15
MSMEG_0072	0.25994	-0.0121192	0.176796	-0.0685491	0.945349	NA	0.0642363	0.174416	0.368294	0.712654	NA	0	0	0	0	2.00261	0	0	0	0.336853
MSMEG_0073	0.167471	0.0619236	0.154668	0.400365	0.688888	NA	0	0.152431	0	1	NA	0	0	0	0	0	0	1.17038	0	0.336853
MSMEG_0074	0	NA	NA	NA	NA	NA	NA	NA	NA	NA	NA	0	0	0	0	0	0	0	0	0
MSMEG_0075	2.55719	-0.486112	0.383172	-1.26865	0.204566	0.300671	-0.691155	0.366639	-1.88511	0.0594149	0.12807	3.25607	2.05921	8.85899	0	0	2.81938	3.51115	1.16247	1.34741
MSMEG_0076	494.718	-1.09878	0.0933519	-11.7703	5.55498e-32	2.51455e-30	-0.8514	0.100058	-8.50909	1.75296e-17	5.05131e-16	779.828	761.906	675.498	407.776	412.537	396.123	333.95	330.141	354.706
MSMEG_0077	205.59	-0.658849	0.198477	-3.31952	0.000901732	0.00262838	-0.457222	0.203978	-2.24153	0.0249921	0.0625754	297.93	272.845	222.582	189.366	184.24	188.898	129.913	232.494	132.046
MSMEG_0078	357.557	-0.759931	0.108179	-7.02476	2.14433e-12	2.12172e-11	-0.590415	0.115782	-5.09937	3.4079e-07	2.64032e-06	493.294	503.476	436.305	309.027	302.394	329.867	256.314	305.729	281.609
MSMEG_0079	303.567	-0.925863	0.114325	-8.09853	5.5628e-16	7.72677e-15	-0.694872	0.122667	-5.66469	1.47289e-08	1.41475e-07	465.617	427.285	387.581	256.748	272.355	252.334	204.817	248.768	216.596
MSMEG_0080	208.309	-0.640126	0.146125	-4.38067	1.18313e-05	4.8431e-05	-0.744891	0.157266	-4.73651	2.17432e-06	1.50213e-05	297.93	302.703	242.515	173.101	172.224	146.608	158.392	213.894	167.416
MSMEG_0081	217.845	-0.958122	0.187419	-5.11219	3.18439e-07	1.63194e-06	-0.727374	0.19349	-3.75924	0.000170432	0.000812583	341.887	305.792	291.239	185.881	210.274	153.656	126.792	215.057	130.025
MSMEG_0082	422.686	-0.956827	0.117091	-8.17162	3.04278e-16	4.34588e-15	-0.863641	0.123804	-6.97588	3.03952e-12	4.82359e-11	711.45	601.288	552.58	365.953	296.386	336.916	320.685	299.917	318.999
MSMEG_0083	520.115	-1.11502	0.10161	-10.9735	5.12351e-28	1.74412e-26	-1.15328	0.109286	-10.5529	4.92682e-26	3.11243e-24	857.973	826.771	785.128	418.232	336.438	329.867	374.523	385.939	366.159
MSMEG_0084	169.182	-1.83031	0.155614	-11.7619	6.13394e-32	2.72297e-30	-1.74589	0.171927	-10.1549	3.15248e-24	1.56908e-22	407.008	281.082	298.991	91.7786	92.12	91.6298	85.0479	83.6977	91.2871
MSMEG_0085	704.601	-1.75047	0.115966	-15.0946	1.75686e-51	2.68432e-49	-1.54906	0.120932	-12.8093	1.45494e-37	1.87431e-35	1525.47	1142.86	1242.47	435.658	424.553	438.413	378.034	397.564	356.39
MSMEG_0086	155.451	-1.51452	0.125498	-12.0681	1.55734e-33	7.99353e-32	-1.11249	0.140366	-7.92565	2.26965e-15	5.25056e-14	255.601	250.193	275.736	115.014	114.149	124.053	88.1689	84.8601	91.2871
MSMEG_0087	172.826	-1.378	0.147768	-9.32541	1.1055e-20	2.32793e-19	-0.88045	0.157002	-5.6079	2.04793e-08	1.92213e-07	281.65	258.43	276.844	144.058	118.154	166.343	100.653	122.059	87.2448
MSMEG_0089	160.263	-1.94372	0.165227	-11.7639	5.98788e-32	2.67621e-30	-1.50506	0.176727	-8.51631	1.64715e-17	4.76729e-16	346.771	245.045	321.138	96.4256	92.12	114.185	67.102	89.51	70.0654
MSMEG_0090	286.521	1.72562	0.181227	9.52189	1.70055e-21	3.8002e-20	1.79107	0.184677	9.69838	3.06322e-22	1.29841e-20	109.078	102.96	99.6637	384.541	306.399	472.246	414.316	288.292	401.192
MSMEG_0091	948.285	2.44487	0.181247	13.4892	1.81086e-41	1.45089e-39	2.20616	0.182535	12.0862	1.24902e-33	1.30255e-31	250.717	223.424	230.334	1396.43	819.067	1353.3	1314.73	1663.49	1283.07
MSMEG_0092	632.931	-0.0862325	0.145319	-0.5934	0.552913	0.656422	0.228309	0.147466	1.54821	0.121572	0.226332	651.213	587.903	590.23	793.478	540.704	809.162	543.448	646.332	533.911
MSMEG_0093	462.472	-0.754519	0.13099	-5.76013	8.40492e-09	5.26911e-08	-0.690168	0.136151	-5.06914	3.99614e-07	3.06713e-06	621.908	644.531	635.633	401.967	396.516	363.7	409.634	284.805	403.55
MSMEG_0094	3.82102	0.305333	0.390661	0.78158	0.434461	0.545881	0.364836	0.392172	0.930296	0.352218	0.498078	1.62803	3.08881	3.32212	4.64702	4.00522	5.63876	4.68154	2.32494	5.05279
MSMEG_0095	450.304	-0.851392	0.145137	-5.86614	4.46054e-09	2.91599e-08	-0.869209	0.15034	-5.78164	7.3975e-09	7.33056e-08	628.421	648.65	676.606	329.938	394.514	325.638	380.375	265.043	403.55
MSMEG_0096	2393.41	-0.0751992	0.141685	-0.530748	0.595594	0.694084	0.117979	0.142354	0.828772	0.407233	0.555433	2547.87	2202.32	2342.1	2494.29	2667.47	2555.77	1875.74	2841.07	2014.04
MSMEG_0097	827.362	0.193681	0.0979523	1.9773	0.048008	0.0899637	0.11226	0.101593	1.105	0.269161	0.409729	750.523	741.314	818.349	864.345	811.056	823.259	962.446	784.666	890.302
MSMEG_0098	425.354	-0.0843096	0.102267	-0.824403	0.40971	0.521868	0.0349444	0.108216	0.322915	0.74676	0.837381	403.752	440.67	447.379	450.761	416.543	456.739	439.284	368.502	404.56
MSMEG_0099	45.2598	0.236876	0.212633	1.11401	0.265273	0.370796	0.00333154	0.237281	0.0140405	0.988798	0.994467	30.9326	42.2137	52.0466	38.3379	42.0548	47.9294	47.9858	54.636	51.2016
MSMEG_0100	304.954	0.549278	0.154018	3.56633	0.00036201	0.00115066	0.00545056	0.161572	0.0337345	0.973089	0.985084	258.857	246.075	284.595	246.292	240.313	304.493	447.087	304.567	412.308
MSMEG_0101	157.541	0.122485	0.126093	0.971387	0.331356	0.441763	-0.121153	0.141989	-0.853259	0.393515	0.541785	157.919	159.588	155.032	142.896	154.201	138.15	173.607	156.933	179.542
MSMEG_0102	616.897	0.499212	0.0862318	5.78918	7.07288e-09	4.50716e-08	0.265365	0.0921811	2.87874	0.0039927	0.0130703	547.019	491.121	499.426	620.377	570.743	648.457	718.616	727.705	728.612
MSMEG_0103	25.3537	0.611921	0.290064	2.10961	0.0348923	0.0685022	0.098286	0.313469	0.313543	0.753868	0.842746	26.0485	16.4736	21.0401	27.8821	12.0156	25.3744	39.0128	20.9244	39.4118
MSMEG_0104	55.7442	-0.10683	0.208268	-0.512944	0.607991	0.704622	0.0143776	0.225281	0.0638208	0.949113	0.971288	42.3288	65.8946	60.9056	45.3084	60.0782	70.4845	54.6179	46.4987	55.5807
MSMEG_0105	24.7643	0.284855	0.264968	1.07506	0.282349	0.389468	0.241275	0.28933	0.833908	0.404333	0.55297	17.9084	23.6809	21.0401	19.7498	28.0365	31.0132	27.309	30.2242	23.9165
MSMEG_0106	14.8588	0.526044	0.332591	1.58165	0.113729	0.185916	0.416589	0.350185	1.18962	0.234194	0.37076	14.6523	13.3848	5.53687	12.7793	12.0156	23.9647	19.8965	11.6247	19.8743
MSMEG_0107	718.373	-0.580736	0.089778	-6.46858	9.89311e-11	8.01452e-10	-0.0192136	0.092632	-0.207419	0.835683	0.898363	879.138	798.972	762.981	838.787	825.075	738.677	535.646	552.172	533.911
MSMEG_0108	1343.64	0.336229	0.0677596	4.96209	6.97401e-07	3.4168e-06	0.279993	0.0709465	3.94654	7.92897e-05	0.000404766	1203.12	1109.91	1164.96	1424.31	1375.79	1418.15	1455.18	1497.26	1444.09
MSMEG_0111	429.347	0.690081	0.146645	4.70579	2.52888e-06	1.14822e-05	0.860569	0.149809	5.74443	9.22291e-09	9.03048e-08	333.747	267.697	258.018	532.083	514.67	541.321	417.437	577.746	421.403
MSMEG_0112	0.679356	-0.081967	0.28937	-0.28326	0.776978	NA	-0.0850492	0.267977	-0.317375	0.750959	NA	1.62803	1.0296	0	0	2.00261	0	0.780256	0	0.673705
MSMEG_0113	13.1919	0.174477	0.331246	0.526728	0.598382	0.696558	-0.0848531	0.353373	-0.240123	0.810235	0.8825	6.51213	16.4736	15.5032	16.2646	6.00782	12.6872	19.5064	11.6247	14.1478
MSMEG_0114	24.8142	0.0689223	0.268957	0.256258	0.797752	0.858092	0.152417	0.290747	0.524225	0.600122	0.728025	26.0485	23.6809	21.0401	26.7203	26.0339	26.7841	31.2102	20.9244	20.8849
MSMEG_0116	9.43604	0.348174	0.355076	0.980563	0.326808	0.437476	-0.0723893	0.375523	-0.19277	0.847139	0.906614	11.3962	6.17762	8.85899	3.48526	8.01043	12.6872	14.0446	8.13727	12.1267
MSMEG_0117	50.6493	-0.141846	0.229455	-0.618186	0.536453	0.641634	0.433581	0.239699	1.80886	0.070473	0.146754	39.0728	55.5985	40.9728	62.7347	76.0991	54.9779	31.6004	49.9861	44.8014
MSMEG_0118	43.1808	-0.2808	0.206417	-1.36036	0.173717	0.263038	-0.579506	0.237817	-2.43677	0.0148192	0.0402322	48.841	48.3913	60.9056	30.2056	30.0391	40.881	40.5733	45.3362	43.454
MSMEG_0119	196.637	-0.166254	0.152184	-1.09246	0.274633	0.381064	-0.418768	0.163295	-2.56449	0.0103328	0.0295287	255.601	211.069	205.972	164.969	168.219	160.705	176.728	247.606	178.869
MSMEG_0120	839.32	-0.496483	0.0980818	-5.06193	4.15037e-07	2.10239e-06	-0.156722	0.100899	-1.55326	0.120361	0.224397	1019.15	933.85	946.805	815.551	961.252	826.078	669.07	745.142	636.988
MSMEG_0121	372.083	-0.13126	0.107017	-1.22653	0.219998	0.318578	-0.521405	0.116935	-4.45894	8.23672e-06	5.11486e-05	416.776	430.374	441.842	285.792	296.386	310.132	433.042	351.065	383.338
MSMEG_0122	114.55	-0.297289	0.169865	-1.75015	0.0800931	0.13932	-0.505393	0.185959	-2.71777	0.00657244	0.0200097	130.243	146.204	131.778	76.6758	106.138	102.907	104.164	137.171	95.6662
MSMEG_0123	2.14852	-0.217064	0.384192	-0.564988	0.572082	0.673263	-0.209572	0.369432	-0.567282	0.570522	0.703775	3.25607	4.11841	1.10737	3.48526	0	1.40969	1.95064	2.32494	1.68426
MSMEG_0124	49.3258	-0.03788	0.205049	-0.184736	0.853436	0.897994	0.0982267	0.224466	0.437601	0.661675	0.776703	43.9569	56.6282	43.1876	42.9849	56.073	59.207	47.5956	48.8236	45.4751
MSMEG_0125	6.84249	0.173225	0.371026	0.466881	0.640585	0.732065	-0.182399	0.38685	-0.471497	0.637286	0.757892	4.8841	4.11841	11.0737	4.64702	8.01043	4.22907	8.58282	9.29974	6.73705
MSMEG_0126	117.525	-0.30043	0.154437	-1.94533	0.0517351	0.0958003	-0.086224	0.166884	-0.516672	0.605385	0.730733	131.871	109.138	146.173	113.852	128.167	122.643	106.895	89.51	109.477
MSMEG_0127	95.1173	0.502005	0.211092	2.37813	0.0174007	0.0373847	0.0224873	0.225005	0.0999414	0.920391	0.954285	56.9811	95.7531	93.0194	80.161	80.1043	93.0395	135.374	84.8601	136.762
MSMEG_0128	70.3588	0.0986872	0.187169	0.527263	0.598011	0.696372	0.0983189	0.20421	0.481461	0.630189	0.751969	56.9811	76.1906	67.5498	78.9993	76.0991	63.436	81.9269	59.2859	72.7602
MSMEG_0129	1080.38	-0.259171	0.132078	-1.96225	0.0497329	0.0926937	-0.36864	0.134341	-2.74406	0.00606844	0.018771	1361.04	1167.57	1208.15	925.918	1003.31	941.673	922.653	1275.23	917.924
MSMEG_0130	22.9967	-0.170436	0.277362	-0.61449	0.538891	0.643964	0.730819	0.287313	2.54363	0.0109707	0.0310143	17.9084	19.5625	17.718	29.0439	34.0443	38.0616	16.3854	19.762	14.4847
MSMEG_0131	279.639	-0.768596	0.124125	-6.19211	5.93659e-10	4.30977e-09	0.23171	0.126647	1.82957	0.0673141	0.141567	314.21	295.496	302.313	369.438	398.519	310.132	161.123	175.533	189.985
MSMEG_0132	786.344	0.681272	0.089746	7.59111	3.17166e-14	3.80252e-13	0.356368	0.0944098	3.77469	0.000160208	0.000769982	560.043	594.081	659.995	776.052	758.989	800.704	1001.85	917.187	1008.2
MSMEG_0133	649.797	0.555707	0.0937408	5.92812	3.06419e-09	2.04752e-08	0.334541	0.0988112	3.38566	0.000710083	0.00289767	491.666	535.393	531.54	657.553	606.79	707.664	727.979	819.54	770.045
MSMEG_0134	1624.68	0.249109	0.112663	2.2111	0.0270291	0.0548599	0.151271	0.114266	1.32385	0.185554	0.311072	1657.34	1375.55	1390.86	1679.9	1710.23	1528.1	1611.23	1999.44	1669.44
MSMEG_0135	1710.15	0.288094	0.126196	2.2829	0.0224363	0.0465298	0.354888	0.127333	2.78709	0.00531834	0.0167104	1579.19	1432.18	1364.28	1800.72	2124.77	1711.36	1570.27	2091.28	1717.27
MSMEG_0136	1836.24	0.381238	0.0779561	4.89042	1.00622e-06	4.81843e-06	0.351994	0.0799118	4.40477	1.05894e-05	6.40629e-05	1610.12	1587.65	1414.12	2055.14	1958.55	1879.12	1961.56	2055.24	2004.61
MSMEG_0137	2428.55	0.231317	0.108284	2.1362	0.0326628	0.0646955	0.425992	0.10914	3.90318	9.49389e-05	0.000477602	2308.55	1981.99	1903.58	2775.43	3047.97	2544.49	2254.16	2660.89	2379.86
MSMEG_0138	1681.53	0.316133	0.0906988	3.48553	0.000491167	0.00152144	0.414432	0.0923312	4.48853	7.17148e-06	4.51308e-05	1540.12	1426	1257.98	1955.23	1908.49	1779.03	1688.08	1771.6	1807.21
MSMEG_0139	1870.95	0.486005	0.100751	4.82382	1.40832e-06	6.60904e-06	0.539099	0.102072	5.28157	1.2808e-07	1.07332e-06	1665.48	1403.35	1285.66	2091.16	2186.85	2079.29	1983.41	2163.35	1980.02
MSMEG_0140	833.223	0.572106	0.0826618	6.92105	4.4832e-12	4.29368e-11	0.705641	0.0860337	8.20192	2.36583e-16	5.91007e-15	630.049	611.584	571.405	970.065	1019.33	983.963	867.255	954.386	890.975
MSMEG_0141	473.089	0.778513	0.124314	6.26245	3.78971e-10	2.85205e-09	0.821751	0.128203	6.40977	1.45739e-10	1.88115e-09	262.113	334.621	338.856	602.95	558.728	528.634	592.995	482.424	556.481
MSMEG_0142	262.266	0.4757	0.120701	3.94114	8.10968e-05	0.000287848	0.921051	0.125931	7.31392	2.59458e-13	4.73512e-12	198.62	172.973	176.072	340.394	388.506	325.638	259.435	233.656	265.103
MSMEG_0143	911.759	0.438829	0.102368	4.28677	1.81289e-05	7.22735e-05	0.862101	0.104203	8.27328	1.30319e-16	3.3315e-15	688.658	633.206	630.096	1173.37	1247.62	1162.99	805.224	1006.7	857.964
MSMEG_0144	105.423	-1.0665	0.163052	-6.54081	6.11861e-11	5.07566e-10	-0.255134	0.170925	-1.49266	0.135525	0.245342	149.779	150.322	115.167	111.528	128.167	107.136	67.8823	53.4735	65.3494
MSMEG_0145	217.286	0.515326	0.158263	3.25614	0.00112939	0.00322333	1.1166	0.161894	6.89712	5.30664e-12	8.18418e-11	153.035	143.115	119.596	306.703	366.477	262.202	174.777	212.732	216.933
MSMEG_0146	560.156	-0.831412	0.0997526	-8.33475	7.76651e-17	1.16336e-15	-0.128264	0.102596	-1.25018	0.211232	0.344196	621.908	677.479	736.404	621.538	618.806	624.493	346.434	399.889	394.454
MSMEG_0147	53.1677	-0.601629	0.288479	-2.08552	0.0370221	0.0721766	0.310274	0.291933	1.06283	0.287861	0.429341	45.5849	49.4209	66.4424	51.1172	100.13	62.0263	26.9188	54.636	22.2323
MSMEG_0148	22.1882	-1.41564	0.291309	-4.85958	1.17633e-06	5.56805e-06	-0.227686	0.297305	-0.765831	0.443777	0.591643	17.9084	35.0065	38.7581	30.2056	22.0287	25.3744	8.19269	12.7871	9.43188
MSMEG_0149	10.7286	0.28136	0.350862	0.801909	0.422606	0.534872	0.180491	0.368437	0.489883	0.624217	0.746357	13.0243	9.26642	5.53687	11.6175	18.0235	4.22907	10.9236	10.4622	13.4741
MSMEG_0150	23.4479	0.217888	0.257001	0.847808	0.396545	0.507856	-0.527791	0.298835	-1.76616	0.0773693	0.158403	19.5364	24.7105	29.8991	15.1028	14.0183	18.326	30.43	31.3866	27.6219
MSMEG_0151	4.24812	-0.317856	0.386933	-0.821475	0.411376	0.523482	-0.537617	0.391966	-1.37159	0.170191	0.290731	6.51213	6.17762	5.53687	4.64702	0	2.81938	3.51115	4.64987	4.37908
MSMEG_0152	23.3281	0.0398369	0.334794	0.118989	0.905284	0.936075	-1.04067	0.357255	-2.91296	0.00358021	0.0119099	55.3531	16.4736	18.8254	12.7793	8.01043	8.45814	36.2819	32.5491	21.2217
MSMEG_0155	138.677	0.0352977	0.183795	0.192049	0.847703	0.894919	-2.05048	0.221674	-9.24998	2.24535e-20	8.33444e-19	244.205	151.352	168.321	38.3379	42.0548	35.2422	221.593	175.533	171.458
MSMEG_0156	34.6361	-0.326573	0.288032	-1.13381	0.256875	0.361041	-1.09288	0.314178	-3.47854	0.000504156	0.00215085	76.5175	24.7105	46.5097	19.7498	20.0261	15.5066	42.1338	32.5491	34.0221
MSMEG_0157	51.7233	-0.405177	0.231323	-1.75156	0.079849	0.138969	-0.836368	0.25643	-3.26159	0.00110789	0.00428168	97.682	63.8354	46.5097	30.2056	38.0496	38.0616	46.0351	56.9609	48.1699
MSMEG_0158	251.743	-0.273869	0.104802	-2.61319	0.00897008	0.0208984	-0.586294	0.119277	-4.91539	8.8605e-07	6.47536e-06	325.607	297.555	290.132	191.689	216.282	195.947	248.902	247.606	251.966
MSMEG_0159	15.4199	-0.350266	0.330603	-1.05947	0.289384	0.397502	-0.286108	0.348542	-0.820871	0.41172	0.559581	14.6523	15.444	24.3622	9.29403	10.013	22.555	13.2644	19.762	9.43188
MSMEG_0160	22.635	-0.338308	0.276433	-1.22383	0.221015	0.319698	-0.18051	0.299035	-0.60364	0.546083	0.682993	17.9084	24.7105	33.2212	16.2646	32.0417	21.1453	20.2867	18.5995	19.5375
MSMEG_0161	75.9346	-0.425356	0.172364	-2.46778	0.0135954	0.0301967	-0.367984	0.191862	-1.91796	0.0551161	0.120385	104.194	88.5458	81.9457	74.3523	60.0782	70.4845	61.2501	77.8853	64.6757
MSMEG_0162	2.47502	0.14194	0.385225	0.368459	0.712531	0.791835	-0.264504	0.369822	-0.715219	0.474474	0.620357	1.62803	1.0296	5.53687	2.32351	2.00261	0	5.07166	2.32494	2.35797
MSMEG_0163	2.47124	0.149867	0.383474	0.390814	0.695934	0.777865	0.272067	0.372079	0.731206	0.464654	0.61248	3.25607	1.0296	1.10737	3.48526	4.00522	1.40969	1.95064	4.64987	1.34741
MSMEG_0164	5.03068	-0.296027	0.38699	-0.764947	0.444303	0.55498	0.00348503	0.392215	0.00888551	0.99291	0.996526	6.51213	3.08881	6.64424	4.64702	6.00782	5.63876	2.7309	6.97481	3.03167
MSMEG_0166	680.12	-0.0220626	0.113927	-0.193655	0.846446	0.894233	-0.321193	0.118636	-2.70739	0.00678146	0.0205983	831.925	636.294	734.189	565.774	630.822	555.418	720.957	775.366	670.337
MSMEG_0167	55.7875	-0.074514	0.200132	-0.372324	0.709651	0.789302	0.00191297	0.219054	0.0087329	0.993032	0.996526	73.2615	50.4505	49.8318	53.4407	60.0782	57.7973	55.7883	44.1738	57.265
MSMEG_0168	13.1736	-0.357248	0.312242	-1.14414	0.252566	0.356086	-0.190079	0.33687	-0.564251	0.572583	0.705395	17.9084	16.4736	12.1811	13.9411	10.013	14.0969	10.5335	11.6247	11.7898
MSMEG_0169	11.9941	0.562877	0.345313	1.63005	0.103091	0.171514	0.342773	0.363762	0.9423	0.346039	0.491924	4.8841	9.26642	11.0737	11.6175	20.0261	7.04845	19.1163	12.7871	12.1267
MSMEG_0170	46.1404	0.469216	0.226331	2.07314	0.038159	0.0740853	0.372717	0.245294	1.51947	0.128645	0.235891	48.841	33.9769	29.8991	48.7937	56.073	43.7004	51.4969	41.8488	60.6335
MSMEG_0171	35.7184	0.288699	0.227923	1.26665	0.205279	0.301516	0.109555	0.254217	0.430951	0.666504	0.779585	30.9326	30.8881	33.2212	30.2056	40.0522	35.2422	35.5017	45.3362	40.0855
MSMEG_0172	1081.44	0.0949001	0.144725	0.655727	0.512	0.61972	-1.24138	0.149414	-8.30833	9.7055e-17	2.54044e-15	1668.73	1121.24	1141.7	544.863	516.673	539.911	1472.73	1458.9	1268.25
MSMEG_0173	24.9191	-0.507316	0.262362	-1.93365	0.0531563	0.0982106	-0.465585	0.288779	-1.61225	0.106907	0.204537	26.0485	37.0657	32.1138	18.5881	28.0365	21.1453	23.4077	13.9496	23.9165
MSMEG_0174	58.0057	-0.222699	0.195744	-1.1377	0.255244	0.359257	-0.452437	0.220142	-2.05521	0.0398591	0.0925246	73.2615	73.1018	59.7982	60.4112	38.0496	43.7004	52.2772	58.1234	63.3283
MSMEG_0175	15.9752	0.345108	0.313668	1.10023	0.271231	0.37738	0.146875	0.337157	0.435628	0.663107	0.777809	14.6523	15.444	11.0737	22.0733	12.0156	11.2775	19.5064	23.2494	14.4847
MSMEG_0176	17.9563	-0.350628	0.291337	-1.20351	0.228778	0.329043	-0.0987635	0.313819	-0.314715	0.752978	0.842455	27.6766	17.5032	16.6106	19.7498	22.0287	14.0969	15.9953	12.7871	15.1584
MSMEG_0177	14.9255	0.247628	0.305222	0.811303	0.417191	0.52914	0.192092	0.330421	0.581355	0.561002	0.696218	14.6523	13.3848	12.1811	17.4263	12.0156	16.9163	16.7755	12.7871	18.19
MSMEG_0178	13.3422	0.211549	0.315963	0.669539	0.503152	0.612281	0.0728109	0.342179	0.212786	0.831494	0.896294	16.2803	12.3552	8.85899	15.1028	14.0183	9.86783	14.8249	13.9496	14.8215
MSMEG_0179	71.9095	-0.779675	0.183528	-4.24827	2.15431e-05	8.511e-05	-0.194804	0.195708	-0.995381	0.319551	0.46274	86.2857	84.4274	96.3415	78.9993	78.1017	74.7136	43.6943	45.3362	59.2861
MSMEG_0180	19.4927	-0.559657	0.275087	-2.03447	0.0419042	0.0802186	-0.187814	0.298124	-0.629985	0.528704	0.668469	19.5364	24.7105	25.4696	20.9116	18.0235	21.1453	15.215	16.2745	14.1478
MSMEG_0181	30.8149	-0.317108	0.239772	-1.32254	0.185989	0.278221	-0.223727	0.26453	-0.845751	0.397691	0.546389	27.6766	44.2729	32.1138	26.7203	32.0417	31.0132	26.1386	29.0617	28.2956
MSMEG_0182	63.3493	0.0600864	0.196229	0.306206	0.759448	0.829866	0.0297447	0.214643	0.138577	0.889784	0.936566	65.1213	52.5097	67.5498	49.9554	62.0809	77.5329	64.3711	72.073	58.9492
MSMEG_0183	51.852	-0.644545	0.194774	-3.3092	0.000935645	0.00271759	-0.395192	0.21557	-1.83324	0.0667674	0.140597	58.6092	77.2202	60.9056	48.7937	48.0626	50.7488	39.0128	39.5239	43.7908
MSMEG_0184	103.58	0.112298	0.170038	0.660429	0.508979	0.617273	-0.116635	0.186085	-0.626782	0.530802	0.67039	92.7979	110.167	108.523	119.661	66.0861	94.4492	109.236	115.084	116.214
MSMEG_0185	221.622	-0.893952	0.147777	-6.04932	1.45458e-09	1.00702e-08	-0.402014	0.153928	-2.61169	0.00900949	0.0262494	309.326	277.993	284.595	210.278	246.321	198.766	131.863	192.97	142.489
MSMEG_0186	44.9198	-0.327693	0.222046	-1.47579	0.140001	0.220842	-0.143565	0.241073	-0.595527	0.551491	0.687272	58.6092	42.2137	49.8318	33.6909	46.06	54.9779	34.3313	46.4987	38.0644
MSMEG_0187	223.949	-0.210872	0.122788	-1.71737	0.0859111	0.147378	-0.381979	0.134813	-2.8334	0.00460557	0.0147929	262.113	245.045	259.126	173.101	192.25	218.502	205.207	245.281	214.912
MSMEG_0188	178.402	-0.236518	0.144984	-1.63134	0.102818	0.171233	-0.292513	0.15621	-1.87256	0.0611295	0.130992	226.297	203.861	176.072	138.249	196.256	160.705	176.728	152.283	175.163
MSMEG_0190	12.7549	0.492493	0.333683	1.47593	0.139962	0.220833	-0.0336217	0.359039	-0.0936437	0.925392	0.957453	9.7682	8.23682	14.3959	13.9411	6.00782	9.86783	12.4841	23.2494	16.8426
MSMEG_0191	19.3231	0.83791	0.295306	2.83743	0.00454777	0.0113478	0.246373	0.324243	0.759839	0.447351	0.595199	8.14016	20.5921	11.0737	18.5881	12.0156	19.7357	28.0892	29.0617	26.6114
MSMEG_0192	30.9828	-0.119567	0.267327	-0.447269	0.654681	0.74262	0.457381	0.279357	1.63726	0.101575	0.196286	30.9326	26.7697	24.3622	29.0439	44.0574	46.5198	18.336	32.5491	26.2745
MSMEG_0194	341.544	0.334191	0.117268	2.8498	0.00437464	0.0109826	-0.189937	0.12693	-1.49638	0.134554	0.243946	358.167	299.614	327.783	290.439	244.318	315.77	442.405	384.777	410.623
MSMEG_0195	178.297	0.69219	0.138767	4.98814	6.09641e-07	3.03205e-06	1.32371	0.143887	9.19969	3.58995e-20	1.31033e-18	84.6577	103.99	114.06	252.101	256.334	284.757	166.195	177.858	164.721
MSMEG_0196	96.9583	0.632625	0.195443	3.23688	0.00120845	0.00342221	0.959345	0.203596	4.71199	2.45304e-06	1.67705e-05	83.0297	59.717	46.5097	113.852	124.162	142.379	94.8011	118.572	89.6028
MSMEG_0197	129.231	2.21271	0.208629	10.6059	2.79685e-26	8.46789e-25	2.31184	0.214542	10.7757	4.48292e-27	3.068e-25	22.7925	31.9177	37.6507	171.94	180.235	200.176	140.056	211.569	166.742
MSMEG_0198	341.481	2.5042	0.167409	14.9586	1.36923e-50	1.87414e-48	2.46898	0.170821	14.4536	2.37754e-47	5.38635e-45	81.4016	71.0426	77.5162	446.114	456.595	497.62	392.079	582.396	468.562
MSMEG_0199	56.6905	0.899914	0.207878	4.32905	1.49757e-05	6.04364e-05	1.08292	0.221701	4.88457	1.03653e-06	7.51655e-06	29.3046	35.0065	32.1138	66.22	72.0939	84.5814	69.4428	58.1234	63.3283
MSMEG_0200	27.4469	-0.44809	0.275775	-1.62484	0.104197	0.173047	0.262766	0.287117	0.915189	0.360092	0.506342	37.4447	22.6513	24.3622	40.6614	34.0443	26.7841	15.9953	27.8992	17.1795
MSMEG_0201	2.0758	-0.269325	0.369507	-0.728875	0.466078	0.576044	-0.14387	0.354452	-0.405895	0.68482	0.792553	1.62803	5.14801	1.10737	0	2.00261	4.22907	2.7309	1.16247	0.673705
MSMEG_0202	0	NA	NA	NA	NA	NA	NA	NA	NA	NA	NA	0	0	0	0	0	0	0	0	0
MSMEG_0203	1.61518	-0.928797	0.366595	-2.53358	0.0112905	NA	-0.811728	0.341607	-2.3762	0.0174919	NA	3.25607	5.14801	3.32212	0	0	1.40969	0.390128	0	1.01056
MSMEG_0204	12.1298	0.202683	0.341265	0.593916	0.552568	0.656131	1.05577	0.349982	3.01664	0.00255595	0.00890855	4.8841	7.20722	8.85899	18.5881	24.0313	16.9163	8.97295	11.6247	8.08446
MSMEG_0205	10.4326	-0.167943	0.341783	-0.491374	0.623162	0.716893	0.293758	0.356645	0.823672	0.410126	0.558234	9.7682	9.26642	11.0737	16.2646	10.013	12.6872	10.9236	5.81234	8.08446
MSMEG_0206	275.019	0.780224	0.114075	6.83957	7.94331e-12	7.36073e-11	1.02274	0.120305	8.50127	1.87526e-17	5.38012e-16	157.919	175.032	180.502	367.114	326.425	369.339	310.542	297.592	290.704
MSMEG_0207	18.989	-0.268243	0.296032	-0.906128	0.364868	0.477622	-0.0437553	0.316694	-0.138163	0.890112	0.936735	29.3046	17.5032	15.5032	22.0733	24.0313	12.6872	15.215	19.762	14.8215
MSMEG_0208	61.6322	0.736493	0.202298	3.64063	0.00027197	0.000880217	0.603312	0.219489	2.74871	0.00598311	0.018542	42.3288	37.0657	49.8318	61.573	74.0965	70.4845	81.5368	59.2859	78.4867
MSMEG_0209	40.1341	1.0729	0.236985	4.52729	5.97447e-06	2.55382e-05	0.29209	0.265049	1.10202	0.270452	0.410932	24.4205	21.6217	34.3286	38.3379	28.0365	33.8326	68.6625	49.9861	61.9809
MSMEG_0210	291.407	-0.0592981	0.119324	-0.496949	0.619225	0.713863	0.65503	0.123034	5.32396	1.01531e-07	8.65183e-07	271.881	234.749	234.763	367.114	360.469	444.052	231.736	244.118	233.776
MSMEG_0211	570.967	-0.218225	0.0937815	-2.32695	0.019968	0.0421425	-0.0153639	0.098459	-0.156044	0.875999	0.927604	630.049	629.087	550.365	616.891	598.78	570.924	536.036	482.424	524.143
MSMEG_0212	127.586	-0.276243	0.153693	-1.79736	0.0722779	0.127481	0.115852	0.163464	0.708731	0.478491	0.623871	136.755	119.434	136.207	142.896	158.206	126.872	97.1419	129.034	101.73
MSMEG_0213	101.915	-0.509881	0.164741	-3.09504	0.00196788	0.00534697	-0.0660238	0.175874	-0.375404	0.70736	0.809503	105.822	109.138	127.348	102.234	126.164	102.907	71.0033	96.4848	76.1287
MSMEG_0214	467.022	-0.92191	0.109377	-8.42871	3.49492e-17	5.37743e-16	-0.723181	0.115248	-6.27502	3.4959e-10	4.26124e-09	752.151	596.14	642.277	399.643	362.472	421.497	355.407	326.653	346.958
MSMEG_0215	460.069	-1.06448	0.0921085	-11.5569	6.81602e-31	2.83426e-29	-0.570402	0.0976451	-5.84158	5.17078e-09	5.25883e-08	670.749	618.791	641.17	414.746	426.556	449.691	305.08	325.491	288.346
MSMEG_0216	1302.84	-0.94422	0.0811786	-11.6314	2.85402e-31	1.21759e-29	-1.37202	0.0864233	-15.8755	9.3588e-57	3.07437e-54	2129.47	1925.36	2130.59	812.066	726.947	813.391	1109.13	1048.55	1030.1
MSMEG_0217	103.324	-0.275224	0.170132	-1.61771	0.105726	0.17522	-0.495451	0.187877	-2.63711	0.00836155	0.024679	117.218	134.878	114.06	84.8081	94.1226	77.5329	83.8775	124.384	99.0347
MSMEG_0218	34.1483	0.200708	0.233814	0.858408	0.390667	0.502778	0.515768	0.25199	2.04677	0.0406802	0.0938983	29.3046	29.8585	24.3622	42.9849	44.0574	38.0616	30.8201	34.874	33.0116
MSMEG_0219	317.182	-1.18501	0.108631	-10.9085	1.04962e-27	3.53641e-26	-0.909355	0.117424	-7.74421	9.6176e-15	2.05823e-13	481.898	445.818	530.432	242.807	246.321	276.299	216.521	210.407	204.133
MSMEG_0220	166.073	-0.730179	0.132525	-5.50975	3.59347e-08	2.08193e-07	-0.279141	0.142043	-1.96519	0.0493924	0.110077	193.736	205.921	218.153	166.131	146.19	191.718	115.868	136.009	120.93
MSMEG_0221	349.815	-0.998433	0.120189	-8.30719	9.79916e-17	1.45001e-15	-0.338427	0.124336	-2.72187	0.00649127	0.0198269	465.617	465.38	447.379	384.541	338.441	356.651	205.597	273.18	211.543
MSMEG_0222	265.322	-0.758338	0.131725	-5.757	8.56241e-09	5.35762e-08	-0.588634	0.139724	-4.21283	2.52194e-05	0.000141859	333.747	381.983	355.467	248.615	188.245	260.793	204.817	184.832	229.397
MSMEG_0223	120.401	-1.14871	0.16718	-6.87108	6.37176e-12	5.96331e-11	-0.515233	0.175788	-2.93099	0.00337888	0.0113204	175.828	179.151	160.569	116.175	110.143	126.872	85.0479	49.9861	79.8341
MSMEG_0224	353	-0.0951231	0.106833	-0.890391	0.373256	0.485795	-0.299181	0.115822	-2.58311	0.0097914	0.0282643	400.496	357.272	404.192	293.924	314.409	331.277	375.693	325.491	374.243
MSMEG_0225	1331.7	-0.509166	0.115627	-4.40351	1.06514e-05	4.39845e-05	-0.157227	0.11707	-1.34302	0.179264	0.303079	1691.53	1570.14	1359.86	1341.83	1497.95	1295.5	1006.14	1220.59	1001.8
MSMEG_0226	167.776	-0.606353	0.147773	-4.10326	4.07364e-05	0.000153462	0.194561	0.152712	1.27403	0.202652	0.333522	190.48	180.18	167.213	194.013	246.321	183.26	101.823	122.059	124.635
MSMEG_0227	94.3019	0.327261	0.166032	1.97107	0.0487158	0.091108	0.809153	0.175654	4.6065	4.09498e-06	2.67435e-05	68.3774	63.8354	76.4088	126.631	128.167	122.643	84.2677	81.3727	97.0136
MSMEG_0228	110.28	0.0804497	0.14934	0.538703	0.590091	0.689349	0.44306	0.160612	2.75857	0.0058055	0.0180597	107.45	87.5162	95.2342	138.249	128.167	128.282	101.823	108.11	97.6873
MSMEG_0230	94.2674	-0.457548	0.191831	-2.38516	0.0170716	0.0367738	-0.271948	0.203949	-1.33341	0.182396	0.307309	123.73	118.404	91.912	90.6168	94.1226	87.4008	85.438	96.4848	60.2966
MSMEG_0231	139.177	-0.459137	0.171326	-2.6799	0.00736446	0.0175243	-0.617209	0.184327	-3.34845	0.000812647	0.00326151	157.919	205.921	171.643	131.278	100.13	107.136	150.589	99.9722	128.004
MSMEG_0232	123.632	0.843137	0.261123	3.22889	0.00124272	0.00350866	0.629468	0.266648	2.36067	0.0182418	0.0482678	70.0054	68.9834	102.986	130.116	134.175	138.15	209.499	77.8853	180.89
MSMEG_0233	4920.16	-0.521793	0.104643	-4.9864	6.15143e-07	3.0528e-06	-0.262549	0.105132	-2.49733	0.0125133	0.0347213	6204.43	5816.23	5526.9	4785.27	5278.88	4518.06	3831.06	4609.18	3711.44
MSMEG_0234	4247.44	-0.42616	0.0721158	-5.90939	3.43384e-09	2.28112e-08	-0.618253	0.073409	-8.42203	3.70027e-17	1.02577e-15	5385.53	5160.37	5438.31	3615.38	3330.34	3418.5	3762.79	4234.87	3880.88
MSMEG_0235	295.816	0.8716	0.132911	6.55776	5.46213e-11	4.55408e-10	1.01609	0.138119	7.35661	1.88638e-13	3.47157e-12	192.108	168.855	178.287	400.805	374.488	335.506	304.69	388.264	319.336
MSMEG_0236	213.806	1.03946	0.20094	5.173	2.30363e-07	1.205e-06	0.572503	0.20729	2.76185	0.00574745	0.0178961	140.011	126.641	145.066	241.645	148.193	236.828	347.214	211.569	327.084
MSMEG_0237	6.27448	0.0179723	0.379948	0.0473019	0.962273	0.975638	-0.0154021	0.389372	-0.0395562	0.968447	0.982201	6.51213	5.14801	7.75162	4.64702	6.00782	8.45814	5.85192	2.32494	9.76873
MSMEG_0238	362.544	-0.501486	0.129111	-3.88415	0.000102691	0.00035868	-0.453156	0.135402	-3.34676	0.000817621	0.00327747	450.965	470.528	429.661	358.982	334.436	283.348	333.169	259.23	342.579
MSMEG_0239	725.39	-0.24041	0.0797305	-3.01528	0.00256743	0.0068181	-0.2061	0.0849136	-2.42717	0.0152171	0.0410919	825.413	810.297	775.162	720.288	680.887	679.47	701.84	684.694	650.463
MSMEG_0240	510.498	0.059353	0.0866425	0.685034	0.493323	0.603001	0.423541	0.0912366	4.64223	3.44675e-06	2.28278e-05	436.313	451.996	465.097	612.244	580.756	628.722	461.912	490.561	466.878
MSMEG_0241	2301.08	0.222792	0.0907959	2.45376	0.014137	0.0312306	0.391505	0.0919296	4.25875	2.05576e-05	0.000117331	1989.46	2005.67	1941.23	2660.42	2577.36	2576.91	2093.04	2609.74	2255.9
MSMEG_0242	718.449	0.412212	0.145934	2.82464	0.00473335	0.0117751	0.609115	0.147871	4.11924	3.80118e-05	0.000205884	691.914	508.624	462.882	858.536	883.15	826.078	720.176	852.089	662.589
MSMEG_0243	1858.17	0.601916	0.0771187	7.80506	5.94719e-15	7.52852e-14	-0.0854822	0.0802563	-1.06512	0.286824	0.428377	1673.62	1505.28	1654.42	1585.79	1403.83	1546.43	2506.96	2414.45	2432.75
MSMEG_0244	887.26	0.60502	0.0764084	7.91824	2.40891e-15	3.14643e-14	-0.176126	0.0833023	-2.1143	0.0344901	0.0821311	807.504	744.403	792.88	666.847	684.892	717.532	1223.44	1175.25	1172.58
MSMEG_0245	70.7932	0.421542	0.232327	1.81444	0.0696106	0.12374	0.250145	0.244914	1.02136	0.307085	0.449977	76.5175	48.3913	56.4761	77.8375	58.0756	78.9426	90.8998	52.311	97.6873
MSMEG_0246	590.437	0.381619	0.139086	2.74377	0.00607385	0.0147185	-0.00764234	0.143248	-0.0533505	0.957453	0.975391	509.574	503.476	596.875	577.392	472.616	546.96	794.301	567.284	745.455
MSMEG_0247	285.857	-0.000609449	0.181685	-0.00335443	0.997324	0.997931	0.218338	0.185477	1.17717	0.239128	0.376208	289.79	256.371	261.34	315.997	352.459	280.528	246.561	363.852	205.817
MSMEG_0248	199.465	-0.0225622	0.137797	-0.163735	0.869939	0.909967	0.156023	0.146134	1.06767	0.28567	0.427236	174.199	185.328	213.723	207.954	248.323	193.127	189.992	210.407	172.132
MSMEG_0249	484.942	0.414113	0.138624	2.98731	0.00281448	0.00739053	-0.103517	0.14417	-0.718021	0.472744	0.618958	408.636	444.788	481.708	391.511	392.511	456.739	688.186	481.262	619.135
MSMEG_0250	6321.35	-0.552663	0.0694308	-7.95992	1.72148e-15	2.27567e-14	-0.216489	0.0699821	-3.09349	0.00197819	0.00718448	7073.8	7804.39	7516.86	6361.77	6752.79	6153.3	4897.67	5124.16	5207.41
MSMEG_0251	1377.61	-0.617187	0.0987352	-6.25093	4.08028e-10	3.05324e-09	-0.0979201	0.100133	-0.977903	0.328122	0.472755	1623.15	1674.13	1500.49	1411.53	1572.05	1499.91	928.895	1153.17	1035.15
MSMEG_0253	175.181	-0.1905	0.175824	-1.08347	0.278599	0.385265	-0.116111	0.18349	-0.632789	0.526871	0.667221	170.943	194.595	202.649	178.91	164.214	179.031	190.773	111.597	183.922
MSMEG_0254	171.519	-0.374424	0.158796	-2.35789	0.018379	0.0392683	-0.239484	0.167765	-1.4275	0.153435	0.269466	187.224	191.506	217.045	162.646	172.224	167.753	168.925	109.272	167.079
MSMEG_0255	1792.34	-0.832327	0.127742	-6.51571	7.23464e-11	5.94889e-10	-0.39364	0.128674	-3.05921	0.00221921	0.00792824	2319.95	2249.68	2412.97	1750.76	1746.27	1777.62	1103.67	1599.56	1170.56
MSMEG_0256	112.528	-0.0747681	0.165331	-0.452232	0.651102	0.739965	0.175944	0.17631	0.997927	0.318315	0.461373	110.706	121.493	93.0194	116.175	140.183	117.004	102.994	120.897	90.2765
MSMEG_0257	99.6524	0.0809589	0.163866	0.494054	0.621268	0.715967	0.434234	0.17493	2.48233	0.0130526	0.0359927	86.2857	84.4274	88.5899	105.72	114.149	136.74	87.7788	106.947	86.2343
MSMEG_0258	11.069	0.634977	0.350048	1.81397	0.069682	0.123805	0.254568	0.369481	0.688987	0.490832	0.634796	8.14016	10.296	5.53687	12.7793	8.01043	9.86783	9.36307	17.437	18.19
MSMEG_0259	45.8803	0.648818	0.219835	2.95139	0.00316351	0.00817957	0.167093	0.245028	0.681934	0.495281	0.63879	32.5607	37.0657	39.8655	37.1761	48.0626	42.2907	69.4428	46.4987	59.9598
MSMEG_0260	58.4565	-0.103991	0.211942	-0.490656	0.62367	0.71716	0.094369	0.226869	0.415962	0.677438	0.787073	63.4933	62.8058	48.7245	46.4702	84.1095	62.0263	58.9093	45.3362	54.2333
MSMEG_0261	668.464	-0.233854	0.0867036	-2.69716	0.00699328	0.0167137	-0.225701	0.0919584	-2.45439	0.0141125	0.0385527	711.45	724.84	784.021	606.436	648.845	645.638	630.447	667.256	597.24
MSMEG_0262	281.518	-0.0623603	0.149127	-0.418169	0.675824	0.760511	-0.240502	0.156428	-1.53746	0.124181	0.229241	245.833	355.213	304.528	286.953	240.313	235.418	319.905	251.093	294.409
MSMEG_0263	354.689	-0.264078	0.0954026	-2.76804	0.0056395	0.0137841	-0.13099	0.103368	-1.26722	0.205076	0.336417	393.984	405.663	366.541	363.629	344.449	352.422	318.345	315.029	332.137
MSMEG_0264	298.643	0.0614813	0.11248	0.546596	0.584656	0.684338	0.127155	0.120175	1.05808	0.290018	0.431966	263.741	291.378	301.206	312.512	324.423	305.903	308.591	262.718	317.315
MSMEG_0265	386.132	0.519091	0.114737	4.52419	6.06269e-06	2.58816e-05	0.363462	0.121159	2.99988	0.00270082	0.00934898	306.07	289.318	337.749	415.908	362.472	424.317	461.131	399.889	478.331
MSMEG_0266	6118.21	0.179485	0.072183	2.48653	0.0128996	0.0289151	0.274572	0.0727768	3.77279	0.000161433	0.000774635	5388.79	5448.66	5627.68	6882.23	6472.43	6591.71	6398.88	5726.32	6527.19
MSMEG_0267	7062.08	0.471636	0.103319	4.56483	4.99898e-06	2.17217e-05	0.72026	0.1036	6.9523	3.59375e-12	5.6757e-11	4928.05	5320.99	5408.41	8457.57	9113.87	8468.01	6666.9	8443	6751.88
MSMEG_0268	100.525	-0.182471	0.154869	-1.17823	0.238704	0.340783	-0.344532	0.173951	-1.98063	0.0476324	0.106546	104.194	129.73	106.308	81.3228	92.12	94.4492	99.4827	90.6725	106.445
MSMEG_0269	118.966	-0.0559576	0.161437	-0.346623	0.728875	0.804825	-0.130086	0.175496	-0.741246	0.458544	0.60653	143.267	133.848	97.4489	123.146	102.133	109.956	115.868	132.521	112.509
MSMEG_0270	187.52	-0.176123	0.152788	-1.15273	0.249023	0.352679	-0.178842	0.162222	-1.10245	0.270265	0.410744	198.62	201.802	207.079	174.263	204.266	159.295	145.518	211.569	185.269
MSMEG_0271	30.1538	0.0519437	0.243673	0.21317	0.831194	0.88295	0.39999	0.262322	1.52481	0.127307	0.233699	22.7925	25.7401	29.8991	38.3379	40.0522	31.0132	26.5287	29.0617	27.9588
MSMEG_0272	3.75164	0.629993	0.390718	1.6124	0.106875	0.176825	0.586905	0.387315	1.51532	0.129692	0.237215	1.62803	3.08881	0	6.97053	6.00782	1.40969	3.12102	5.81234	5.7265
MSMEG_0273	8.36946	0.135622	0.375956	0.360739	0.718295	0.796086	0.337857	0.384853	0.877886	0.380006	0.527607	8.14016	7.20722	4.4295	6.97053	18.0235	5.63876	7.41243	12.7871	4.71594
MSMEG_0274	4.71755	0.595925	0.391638	1.52162	0.128104	0.205781	0.736919	0.391015	1.88463	0.0594795	0.128083	3.25607	2.05921	1.10737	5.80877	0	14.0969	6.24205	3.4874	6.4002
MSMEG_0275	5.52473	0.238354	0.384358	0.620137	0.535168	0.640563	0.753383	0.390317	1.93018	0.0535842	0.117663	3.25607	2.05921	4.4295	6.97053	10.013	8.45814	4.68154	5.81234	4.04223
MSMEG_0276	12.2423	0.562364	0.344516	1.63233	0.10261	0.170974	1.13148	0.355493	3.18284	0.00145839	0.00546583	8.14016	5.14801	5.53687	18.5881	26.0339	12.6872	10.1433	12.7871	11.1161
MSMEG_0277	32.2107	0.468375	0.277156	1.68993	0.0910407	0.154837	1.78766	0.279066	6.40588	1.49509e-10	1.92603e-09	13.0243	14.4144	14.3959	56.926	56.073	66.2554	21.0669	30.2242	17.5163
MSMEG_0278	837.008	0.00235485	0.134898	0.0174565	0.986072	0.98999	0.114225	0.137067	0.833348	0.404648	0.553286	949.143	710.426	781.806	873.639	873.137	895.153	727.589	970.661	751.518
MSMEG_0279	21.652	0.192491	0.285641	0.67389	0.500381	0.610153	0.534975	0.30259	1.76799	0.0770628	0.157874	16.2803	17.5032	17.718	31.3674	18.0235	29.6035	17.9459	27.8992	18.5269
MSMEG_0280	902.004	0.41729	0.137021	3.04544	0.00232341	0.00623716	0.271022	0.139303	1.94556	0.0517077	0.114191	727.731	727.929	826.101	918.948	889.158	962.818	1181.7	796.29	1087.36
MSMEG_0281	844.882	2.46311	0.140719	17.5037	1.34176e-68	4.19778e-66	2.4685	0.142393	17.3359	2.52292e-67	1.10504e-64	200.248	209.009	184.931	1157.11	1153.5	1195.42	1033.84	1428.67	1041.21
MSMEG_0282	255.711	2.07895	0.144541	14.3831	6.60619e-47	7.48322e-45	2.04868	0.150161	13.6432	2.21645e-42	3.86115e-40	79.7736	63.8354	89.6973	367.114	344.449	310.132	331.609	368.502	346.285
MSMEG_0283	175.049	1.90501	0.188642	10.0986	5.60572e-24	1.46149e-22	1.83115	0.194524	9.41354	4.79724e-21	1.8873e-19	66.7493	51.4801	58.6908	245.13	166.216	269.251	265.287	208.082	244.555
MSMEG_0284	74.6005	-0.300361	0.170712	-1.75946	0.078499	0.137019	-0.592293	0.196081	-3.02065	0.00252231	0.00881468	105.822	81.3386	88.5899	51.1172	70.0913	57.7973	76.4651	67.4231	72.7602
MSMEG_0285	52.2443	-0.111477	0.207858	-0.536315	0.591741	0.690476	-0.0220091	0.226947	-0.0969791	0.922743	0.955916	53.7251	43.2433	63.1203	47.6319	66.0861	46.5198	46.4252	56.9609	46.4857
MSMEG_0286	19.6701	0.486155	0.28852	1.685	0.0919892	0.156208	0.148652	0.315957	0.470481	0.638012	0.757892	16.2803	14.4144	18.8254	23.2351	20.0261	12.6872	27.6991	18.5995	25.264
MSMEG_0287	14.3517	0.849149	0.326197	2.60318	0.00923647	0.0214733	0.0782521	0.354431	0.220782	0.825262	0.892653	4.8841	8.23682	16.6106	12.7793	10.013	9.86783	21.8472	26.7368	18.19
MSMEG_0288	14.7742	0.122503	0.316393	0.387185	0.698619	0.779804	0.163748	0.338104	0.484313	0.628164	0.750097	14.6523	13.3848	12.1811	13.9411	14.0183	18.326	10.5335	19.762	16.1689
MSMEG_0289	37.778	0.631537	0.236966	2.66509	0.00769677	0.0182095	0.749234	0.254583	2.94299	0.00325059	0.010927	29.3046	21.6217	26.577	47.6319	52.0678	39.4713	47.2055	36.0365	40.0855
MSMEG_0290	195.434	1.14488	0.146406	7.81992	5.28549e-15	6.70379e-14	0.697726	0.156924	4.44626	8.73802e-06	5.3905e-05	99.31	131.789	122.919	231.189	168.219	187.489	255.924	282.48	279.588
MSMEG_0291	41.1397	-0.361972	0.22731	-1.59242	0.111291	0.182614	0.144642	0.241854	0.598054	0.549804	0.68593	56.9811	37.0657	37.6507	53.4407	44.0574	45.1101	37.0622	27.8992	30.9904
MSMEG_0292	13.0958	-0.33387	0.350567	-0.952372	0.340908	0.452204	0.442803	0.357976	1.23696	0.216101	0.350304	11.3962	12.3552	12.1811	26.7203	16.0209	11.2775	4.68154	12.7871	10.4424
MSMEG_0293	43.9195	-0.66441	0.23036	-2.88423	0.00392374	0.00994943	-0.233133	0.245915	-0.948022	0.343118	0.488893	65.1213	52.5097	44.295	51.1172	54.0704	29.6035	28.8695	38.3614	31.3273
MSMEG_0295	43.2647	-0.603484	0.216878	-2.7826	0.00539255	0.0132346	-0.0531734	0.231992	-0.229204	0.81871	0.888367	50.469	53.5393	47.6171	59.2495	40.0522	43.7004	29.6497	29.0617	36.0432
MSMEG_0296	49.8622	0.245122	0.225505	1.08699	0.27704	0.383352	0.0895109	0.244485	0.36612	0.714275	0.813622	29.3046	51.4801	54.2613	40.6614	44.0574	63.436	52.2772	52.311	60.9703
MSMEG_0297	5.8875	-0.570788	0.380377	-1.50059	0.133462	0.212518	-0.00609224	0.387943	-0.015704	0.987471	0.993672	6.51213	9.26642	4.4295	5.80877	8.01043	7.04845	2.7309	5.81234	3.36853
MSMEG_0298	4.33526	-0.529417	0.390362	-1.35622	0.175029	0.26478	-0.0106813	0.392717	-0.0271985	0.978301	0.988533	6.51213	5.14801	4.4295	5.80877	4.00522	5.63876	4.29141	1.16247	2.02112
MSMEG_0299	15.7499	-0.551528	0.323247	-1.70621	0.0879683	0.150352	0.746267	0.326499	2.28566	0.022274	0.0569196	14.6523	17.5032	7.75162	20.9116	26.0339	29.6035	8.58282	9.29974	7.41076
MSMEG_0300	134.098	-0.562517	0.162126	-3.46963	0.000521176	0.00160284	0.67705	0.163812	4.1331	3.57897e-05	0.000195136	130.243	133.848	99.6637	189.366	220.287	186.079	76.4651	96.4848	74.4444
MSMEG_0301	166.344	0.0803769	0.176594	0.455152	0.649	0.738215	-0.289902	0.187465	-1.54643	0.122	0.226615	148.151	170.914	203.757	123.146	138.18	163.524	209.499	139.496	200.427
MSMEG_0302	82.9871	-0.0944601	0.194964	-0.4845	0.628031	0.721483	-0.679924	0.217316	-3.12873	0.00175562	0.00644742	110.706	101.931	80.8383	56.926	58.0756	59.207	78.8059	120.897	79.4972
MSMEG_0303	125.814	-0.449884	0.199125	-2.25931	0.0238643	0.0490885	-1.06617	0.215406	-4.94961	7.43609e-07	5.48933e-06	182.34	167.825	178.287	96.4256	64.0835	71.8942	164.244	90.6725	116.551
MSMEG_0304	172.988	-0.404196	0.143806	-2.81071	0.00494331	0.0122234	-0.96414	0.161784	-5.95943	2.53112e-09	2.69085e-08	278.394	218.276	199.327	105.72	122.159	117.004	158.392	174.37	183.248
MSMEG_0305	108.203	-0.299675	0.160728	-1.86449	0.0622533	0.11258	-0.518574	0.179129	-2.89498	0.00379183	0.012524	151.407	119.434	121.811	83.6463	76.0991	104.317	105.725	117.409	93.9819
MSMEG_0306	31.9233	0.0552225	0.266892	0.206909	0.836081	0.886834	0.145116	0.28416	0.510686	0.609571	0.734167	35.8167	22.6513	34.3286	30.2056	32.0417	40.881	34.7214	18.5995	38.0644
MSMEG_0307	22.4919	-0.647874	0.259812	-2.49363	0.0126444	0.0284012	-0.821921	0.295573	-2.78077	0.00542295	0.0169823	35.8167	33.9769	27.6844	19.7498	14.0183	14.0969	21.457	17.437	18.19
MSMEG_0308	16.8759	0.056218	0.283365	0.198394	0.842737	0.892022	-0.723168	0.327918	-2.20533	0.0274309	0.0675905	16.2803	23.6809	18.8254	9.29403	12.0156	9.86783	21.457	20.9244	19.5375
MSMEG_0309	341.167	-0.157291	0.109598	-1.43517	0.15124	0.234905	-0.287025	0.118206	-2.42817	0.015175	0.0409951	354.911	388.16	392.01	320.644	306.399	300.264	365.55	295.267	347.295
MSMEG_0310	143.01	0.173119	0.163269	1.06033	0.288994	0.397097	0.0816164	0.174313	0.468218	0.639629	0.758191	110.706	130.76	161.677	148.705	136.177	145.198	164.244	123.222	166.405
MSMEG_0311	1240.99	-0.403721	0.106077	-3.80593	0.00014127	0.000480904	-0.250436	0.10814	-2.31586	0.0205661	0.0532188	1289.4	1582.5	1439.59	1131.55	1205.57	1282.82	1107.57	969.498	1160.46
MSMEG_0315	669.809	-0.217261	0.103544	-2.09825	0.0358827	0.0702052	0.0416091	0.106899	0.389236	0.697102	0.801673	633.305	698.071	757.444	740.037	680.887	731.629	644.492	534.735	607.682
MSMEG_0316	946.84	0.356956	0.0741219	4.8158	1.4661e-06	6.86549e-06	0.221009	0.078471	2.81644	0.00485594	0.0154049	805.876	835.008	830.531	1000.27	933.215	948.721	1065.44	1017.16	1085.34
MSMEG_0317	3387.18	-0.482485	0.101627	-4.74761	2.05831e-06	9.46997e-06	-0.0459302	0.102214	-0.449354	0.653176	0.769614	3697.26	3777.61	3892.42	3570.07	3947.14	3496.03	2388.36	3072.4	2643.28
MSMEG_0318	153.037	0.526512	0.132933	3.96073	7.47204e-05	0.000267382	0.650724	0.143739	4.52712	5.9792e-06	3.78452e-05	120.474	110.167	109.63	176.587	198.258	169.163	164.244	162.745	166.068
MSMEG_0319	228.358	-0.15029	0.145479	-1.03307	0.30157	0.410295	-0.267539	0.154461	-1.73208	0.0832598	0.167857	211.644	248.134	294.562	188.204	194.253	242.467	234.857	202.269	238.829
MSMEG_0320	59.1792	-0.364552	0.211984	-1.71971	0.0854844	0.14687	-0.000406052	0.225406	-0.00180142	0.998563	0.999541	84.6577	52.5097	57.5835	62.7347	82.1069	49.3391	50.3265	44.1738	49.1805
MSMEG_0321	429.773	0.282209	0.147278	1.91617	0.0553434	0.10185	-0.134855	0.152782	-0.882658	0.377421	0.524795	407.008	394.338	438.52	392.673	324.423	403.171	561.394	388.264	558.165
MSMEG_0322	25.6556	0.362691	0.255018	1.42222	0.154963	0.239837	0.172257	0.282949	0.608791	0.542663	0.68027	22.7925	23.6809	19.9327	26.7203	20.0261	28.1938	27.6991	32.5491	29.3062
MSMEG_0323	56.0436	0.608983	0.200931	3.0308	0.00243903	0.00651665	0.392788	0.221852	1.77049	0.0766452	0.157166	55.3531	38.0953	36.5433	58.0877	58.0756	54.9779	64.3711	75.5604	63.3283
MSMEG_0324	16.5585	0.377285	0.346802	1.0879	0.276641	0.383041	0.554346	0.357662	1.54992	0.121162	0.225697	13.0243	7.20722	14.3959	11.6175	30.0391	19.7357	13.6545	27.8992	11.453
MSMEG_0325	14.7991	0.205753	0.307199	0.66977	0.503005	0.612251	-0.130511	0.336578	-0.387758	0.698195	0.802228	11.3962	16.4736	15.5032	15.1028	14.0183	9.86783	15.9953	13.9496	20.8849
MSMEG_0326	62.2455	0.771488	0.213847	3.60766	0.000308969	0.000990692	0.86557	0.227029	3.8126	0.000137512	0.000667744	45.5849	26.7697	46.5097	61.573	80.1043	87.4008	68.6625	75.5604	68.0442
MSMEG_0327	81.1976	0.633636	0.187098	3.38666	0.000707487	0.00210802	0.667635	0.20052	3.32952	0.000869952	0.00345144	60.2372	67.9538	43.1876	87.1316	92.12	102.907	93.2406	101.135	82.8658
MSMEG_0328	17.9048	0.604501	0.32559	1.85663	0.0633635	0.114305	0.696011	0.340068	2.04668	0.0406893	0.0938983	8.14016	13.3848	12.1811	24.3968	20.0261	21.1453	11.7038	25.5743	24.5902
MSMEG_0329	5.62769	0.559325	0.383325	1.45914	0.144527	0.226297	0.315265	0.391622	0.805026	0.420805	0.5691	3.25607	4.11841	4.4295	8.13228	2.00261	7.04845	9.7532	3.4874	8.42132
MSMEG_0330	25.9971	-0.764999	0.263972	-2.89803	0.00375516	0.00956997	-0.313289	0.283471	-1.10519	0.269078	0.409697	43.9569	26.7697	29.8991	19.7498	32.0417	26.7841	15.9953	20.9244	17.8532
MSMEG_0331	10.7332	-0.665317	0.349818	-1.9019	0.0571848	0.104595	-0.0577061	0.362005	-0.159407	0.873348	0.925766	14.6523	9.26642	14.3959	12.7793	10.013	12.6872	4.29141	12.7871	5.7265
MSMEG_0332	9.09456	0.169038	0.346877	0.487316	0.626034	0.719316	-0.057634	0.369986	-0.155774	0.876212	0.927604	8.14016	9.26642	8.85899	5.80877	8.01043	11.2775	12.094	9.29974	9.09502
MSMEG_0333	33.3951	0.0289899	0.230121	0.125976	0.899751	0.931501	-0.326436	0.262105	-1.24544	0.21297	0.346381	45.5849	32.9473	31.0065	30.2056	30.0391	22.555	37.4523	33.7116	37.0538
MSMEG_0334	50.5103	-0.223403	0.230502	-0.969204	0.332444	0.442854	-0.263679	0.248879	-1.05947	0.289387	0.431127	83.0297	52.5097	38.7581	52.2789	46.06	39.4713	50.3265	45.3362	46.8225
MSMEG_0335	26.1788	-1.15194	0.257013	-4.48205	7.39281e-06	3.11351e-05	-0.585206	0.276852	-2.11378	0.0345338	0.0821798	45.5849	41.1841	31.0065	25.5586	20.0261	26.7841	14.8249	12.7871	17.8532
MSMEG_0336	23.5957	-0.562513	0.267277	-2.10461	0.0353255	0.0692389	-0.558577	0.295372	-1.8911	0.0586114	0.126837	40.7008	28.8289	25.4696	16.2646	24.0313	19.7357	23.0176	15.1121	19.2006
MSMEG_0337	62.6598	-0.324564	0.190958	-1.69966	0.0891954	0.152251	-0.240345	0.20989	-1.1451	0.252168	0.391295	78.1456	63.8354	76.4088	75.514	48.0626	53.5682	56.9587	51.1486	60.2966
MSMEG_0338	36.9784	0.00731149	0.233307	0.0313386	0.975	0.982546	0.00647308	0.25573	0.0253121	0.979806	0.989597	43.9569	35.0065	32.1138	33.6909	32.0417	43.7004	39.7931	41.8488	30.6536
MSMEG_0339	30.8571	0.0868571	0.279438	0.310827	0.755932	0.826643	0.457271	0.291921	1.56642	0.11725	0.219468	40.7008	24.7105	15.5032	31.3674	40.0522	43.7004	31.6004	19.762	30.3167
MSMEG_0340	23.0385	0.373793	0.263574	1.41817	0.156141	0.241489	-0.0998149	0.297165	-0.33589	0.736954	0.830637	22.7925	19.5625	22.1475	24.3968	14.0183	18.326	30.43	29.0617	26.6114
MSMEG_0341	72.4405	0.262625	0.190001	1.38223	0.166901	0.254773	-0.110292	0.210668	-0.523537	0.600601	0.728025	48.841	74.1314	83.0531	56.926	60.0782	76.1232	83.4874	79.0478	90.2765
MSMEG_0342	79.9831	-0.183686	0.166122	-1.10573	0.268842	0.374611	-0.277112	0.186978	-1.48205	0.138327	0.249151	91.1698	85.457	88.5899	69.7053	82.1069	66.2554	71.7836	90.6725	74.1076
MSMEG_0343	114.156	-0.608173	0.14941	-4.07051	4.69103e-05	0.00017442	-0.639082	0.167382	-3.81812	0.000134475	0.000654929	174.199	152.381	127.348	99.9109	88.1148	93.0395	97.1419	102.297	92.9713
MSMEG_0344	24.648	0.112393	0.287859	0.390445	0.696208	0.778038	0.423646	0.302654	1.39977	0.161581	0.27966	11.3962	26.7697	23.2549	37.1761	34.0443	19.7357	27.309	20.9244	21.2217
MSMEG_0345	52.6954	0.360036	0.208822	1.72412	0.0846853	0.145917	-0.00428749	0.232697	-0.0184252	0.9853	0.992311	47.2129	56.6282	37.6507	45.3084	52.0678	45.1101	58.1291	75.5604	56.5913
MSMEG_0346	143.903	0.0730672	0.160271	0.455898	0.648463	0.73786	-0.0374487	0.172093	-0.217607	0.827735	0.894297	149.779	160.618	116.274	142.896	132.172	138.15	129.132	175.533	150.573
MSMEG_0347	85.5351	0.108947	0.180539	0.603453	0.546207	0.650223	0.375466	0.192605	1.94941	0.0512461	0.113363	78.1456	62.8058	84.1604	85.9698	110.143	102.907	70.6132	89.51	85.5606
MSMEG_0348	145.452	0.37841	0.146437	2.58411	0.00976311	0.0225303	0.383549	0.157755	2.43129	0.015045	0.0407444	122.102	129.73	107.415	166.131	144.188	160.705	143.177	181.345	154.279
MSMEG_0349	163.037	0.20398	0.167097	1.22073	0.222189	0.320972	0.140836	0.176405	0.798367	0.424658	0.572747	172.571	133.848	141.744	164.969	182.237	148.017	142.787	212.732	168.426
MSMEG_0350	202.074	0.293249	0.186014	1.57649	0.114913	0.187572	0.291635	0.192015	1.51881	0.12881	0.236036	193.736	165.766	160.569	204.469	236.308	204.405	170.486	292.942	189.985
MSMEG_0351	284.895	0.207131	0.132835	1.55931	0.118923	0.193111	0.107356	0.140288	0.765258	0.444118	0.591977	299.558	258.43	233.656	295.086	304.396	252.334	278.942	347.578	294.072
MSMEG_0352	191.859	0.318417	0.149297	2.13277	0.0329432	0.0651723	0.252447	0.158349	1.59424	0.110882	0.210167	196.992	158.559	143.959	187.042	238.31	174.802	196.625	229.006	201.438
MSMEG_0353	62.8162	0.588514	0.209942	2.80322	0.0050595	0.0124919	0.122284	0.23075	0.529944	0.59615	0.725182	68.3774	43.2433	44.295	48.7937	78.1017	45.1101	79.5861	81.3727	76.4656
MSMEG_0354	38.2027	0.220585	0.239977	0.919194	0.357994	0.470593	0.113562	0.261063	0.434997	0.663565	0.777809	45.5849	29.8585	32.1138	36.0144	42.0548	38.0616	46.4252	27.8992	45.812
MSMEG_0355	120.082	0.529051	0.158583	3.33611	0.000849585	0.00248631	0.298471	0.17302	1.72507	0.0845152	0.169754	112.334	81.3386	98.5563	110.367	118.154	131.101	130.693	160.421	137.773
MSMEG_0356	124.228	0.664056	0.15562	4.26717	1.97968e-05	7.84943e-05	-0.19515	0.17684	-1.10354	0.269793	0.410356	99.31	99.8715	120.704	83.6463	92.12	102.907	152.54	181.345	185.606
MSMEG_0357	542.982	0.729627	0.0941021	7.75356	8.93502e-15	1.11815e-13	0.304736	0.100907	3.01998	0.00252795	0.00882968	403.752	390.219	454.023	498.393	554.722	501.85	712.764	678.881	692.232
MSMEG_0358	279.778	0.178389	0.117385	1.51969	0.128589	0.206257	0.0819601	0.126163	0.649638	0.515926	0.658054	278.394	282.111	228.119	286.953	260.339	283.348	284.013	322.004	292.725
MSMEG_0359	3016.65	-0.381911	0.0949205	-4.02348	5.73443e-05	0.000209191	0.121953	0.0955553	1.27626	0.201864	0.332393	2878.36	3411.07	3223.57	3554.97	3392.42	3424.14	2484.73	2172.65	2607.91
MSMEG_0360	598.215	-0.543359	0.129979	-4.18037	2.91031e-05	0.000112277	-0.168734	0.132725	-1.2713	0.20362	0.334934	698.426	711.455	684.357	589.009	594.775	672.422	470.104	569.609	393.781
MSMEG_0361	391.001	-0.561361	0.125451	-4.47475	7.65007e-06	3.21156e-05	-0.467701	0.131338	-3.56106	0.000369366	0.00163087	420.032	505.535	549.258	356.659	310.404	389.074	355.017	302.242	330.789
MSMEG_0362	76.3399	-0.190316	0.164297	-1.15837	0.246715	0.350086	-0.532046	0.190285	-2.79605	0.00517321	0.016309	89.5418	90.605	91.912	63.8965	58.0756	60.6167	85.8282	67.4231	79.1604
MSMEG_0363	672.078	-0.256623	0.102955	-2.49257	0.0126824	0.0284768	-0.0455202	0.106549	-0.427225	0.669215	0.781366	745.639	721.752	685.465	677.303	766.999	645.638	569.587	670.744	565.576
MSMEG_0364	59.5011	-0.125584	0.24332	-0.516126	0.605766	0.702415	-0.410723	0.259711	-1.58146	0.113772	0.214447	58.6092	76.1906	69.7646	40.6614	56.073	53.5682	80.7565	34.874	65.0126
MSMEG_0365	459.109	-1.8303	0.106594	-17.1708	4.39692e-66	1.25599e-63	-1.42808	0.113527	-12.5793	2.74538e-36	3.34021e-34	914.954	810.297	798.417	297.409	316.412	305.903	253.973	219.706	214.912
MSMEG_0366	360.595	-0.413841	0.12166	-3.40162	0.000669874	0.00200504	-1.17791	0.134366	-8.76646	1.84371e-18	5.7863e-17	569.811	470.528	451.809	223.057	206.269	208.634	346.434	418.488	350.327
MSMEG_0367	80.2998	0.297517	0.188134	1.58141	0.113783	0.185946	0.466364	0.200574	2.32514	0.0200642	0.0521839	50.469	78.2498	67.5498	92.9403	94.1226	95.8589	85.438	65.0982	92.9713
MSMEG_0368	621.694	-0.733431	0.0962842	-7.61735	2.58935e-14	3.12147e-13	-0.414112	0.100522	-4.11963	3.79484e-05	0.00020571	739.127	835.008	811.705	616.891	524.683	635.77	473.225	498.699	460.141
MSMEG_0369	675.873	-1.27426	0.118979	-10.7099	9.14221e-27	2.84665e-25	-0.786421	0.12194	-6.44922	1.12426e-10	1.48024e-09	1134.74	1000.77	936.838	566.936	606.79	583.612	373.353	489.399	390.412
MSMEG_0370	2618.45	-0.920495	0.0775523	-11.8693	1.70796e-32	8.07289e-31	-0.546755	0.0788135	-6.93733	3.9957e-12	6.26533e-11	3493.76	3706.57	3484.91	2503.58	2379.1	2402.11	1969.76	1701.85	1924.44
MSMEG_0371	1636.89	-0.743974	0.0905607	-8.2152	2.11808e-16	3.05842e-15	-1.13045	0.0939498	-12.0325	2.39871e-33	2.42454e-31	2564.15	2207.47	2429.58	1063.01	1143.49	1047.4	1368.18	1551.89	1356.84
MSMEG_0373	5909.29	-0.612802	0.0925771	-6.61937	3.60736e-11	3.09809e-10	-0.968631	0.0934455	-10.3657	3.55027e-25	2.02828e-23	8232.96	7899.11	8543.39	4120.74	4143.4	4222.02	5844.12	4646.38	5531.46
MSMEG_0374	575.514	0.609383	0.0899896	6.77171	1.27271e-11	1.15333e-10	0.388896	0.0959018	4.05515	5.01019e-05	0.000265459	429.801	447.877	463.99	578.554	574.749	613.215	651.904	732.355	687.179
MSMEG_0375	826.136	0.725638	0.08211	8.83739	9.79793e-19	1.73044e-17	0.253071	0.0875251	2.89141	0.00383514	0.0126364	659.353	607.466	662.21	765.596	773.007	762.642	1112.26	1078.77	1013.93
MSMEG_0376	58.9216	0.0497887	0.183617	0.271155	0.786272	0.850619	-0.226026	0.209485	-1.07896	0.280604	0.421484	53.7251	66.9242	62.0129	47.6319	54.0704	54.9779	67.8823	62.7733	60.2966
MSMEG_0377	44.3677	0.0137682	0.215384	0.0639241	0.949031	0.96549	-0.276409	0.242381	-1.14039	0.254125	0.393866	55.3531	44.2729	42.0802	41.8232	38.0496	32.4229	46.4252	58.1234	40.7592
MSMEG_0379	5.68642	0.432715	0.37788	1.14511	0.252162	0.355894	-0.11684	0.390944	-0.298868	0.765041	0.850888	3.25607	7.20722	4.4295	3.48526	2.00261	7.04845	9.36307	6.97481	7.41076
MSMEG_0380	1099.12	-0.135072	0.17916	-0.753914	0.450901	0.561809	0.0982384	0.18018	0.545223	0.5856	0.717128	1113.57	1101.67	1099.62	1175.7	1237.61	1150.31	723.297	1384.5	905.797
MSMEG_0381	7200.75	-0.366171	0.117778	-3.10899	0.00187728	0.00511774	-0.0742485	0.118047	-0.628976	0.529365	0.66909	8053.88	8134.89	7632.02	7421.29	7968.38	7211.97	5153.98	7267.75	5962.63
MSMEG_0382	5497.2	-0.347585	0.086084	-4.03774	5.39685e-05	0.000198085	-0.0173871	0.0865637	-0.20086	0.840808	0.901896	6018.84	6205.42	5619.92	5670.52	6286.19	5679.64	4338.22	5071.85	4584.23
MSMEG_0383	1971.46	0.787313	0.189403	4.15681	3.22722e-05	0.000123416	0.690195	0.190006	3.6325	0.000280689	0.00126744	1458.72	1273.62	1248.01	2112.07	2373.09	2145.55	1798.49	3378.13	1955.43
MSMEG_0385	162.731	0.19229	0.167597	1.14734	0.251243	0.355077	0.247442	0.176017	1.40578	0.159789	0.277581	153.035	146.204	135.1	167.293	194.253	160.705	136.935	212.732	158.321
MSMEG_0386	737.963	0.27666	0.113694	2.43338	0.0149588	0.0327925	0.209846	0.117055	1.79271	0.0730185	0.150859	682.146	653.798	626.774	709.832	823.072	748.545	705.742	918.35	773.414
MSMEG_0387	3194.52	-1.08056	0.163794	-6.59708	4.19341e-11	3.55953e-10	-0.477708	0.164114	-2.91082	0.00360478	0.0119855	4718.04	4405.67	4161.51	3065.87	3374.39	2953.3	1529.69	2671.35	1870.88
MSMEG_0389	2016.1	-0.938676	0.0909976	-10.3154	6.00382e-25	1.65736e-23	-0.496388	0.0922678	-5.37986	7.4544e-08	6.46967e-07	2666.72	2810.82	2676.52	1916.89	2060.68	1783.26	1301.47	1556.54	1372
MSMEG_0390	763.581	-0.844669	0.130494	-6.47287	9.61563e-11	7.81865e-10	-0.554239	0.133067	-4.16512	3.11188e-05	0.000171375	1009.38	1079.02	998.851	672.656	726.947	682.29	466.203	690.506	546.375
MSMEG_0391	4547.06	-0.232312	0.0691859	-3.3578	0.000785653	0.00232093	-0.228866	0.0701887	-3.26072	0.0011113	0.00429233	5032.25	5196.4	4911.2	4060.33	4601.99	4255.85	4331.59	4155.82	4378.07
MSMEG_0392	322.466	0.0416725	0.129353	0.322162	0.74733	0.81983	0.0473927	0.135811	0.348961	0.727118	0.824069	335.375	302.703	305.635	313.674	358.467	305.903	285.574	383.614	311.252
MSMEG_0393	473.577	-0.584813	0.103839	-5.63192	1.78211e-08	1.07024e-07	0.189136	0.106544	1.77519	0.075867	0.155862	493.294	530.245	489.459	577.392	602.785	554.008	320.295	382.452	312.262
MSMEG_0394	1213.89	-0.605614	0.109518	-5.52981	3.20574e-08	1.87215e-07	-0.304637	0.111357	-2.73569	0.00622504	0.0191115	1416.39	1511.46	1507.14	1135.03	1335.74	1115.06	894.954	1107.83	901.418
MSMEG_0395	229.109	-1.27316	0.142668	-8.92396	4.4992e-19	8.23391e-18	-0.434022	0.146874	-2.95507	0.00312595	0.0105646	314.21	351.095	294.562	226.542	284.37	200.176	119.769	147.633	123.625
MSMEG_0396	7.98715	-0.429411	0.366197	-1.17262	0.240947	0.343551	0.468785	0.373601	1.25478	0.20956	0.341979	8.14016	6.17762	7.75162	11.6175	16.0209	8.45814	5.85192	3.4874	4.37908
MSMEG_0397	0.428057	-0.100024	0.249002	-0.401697	0.687907	NA	-0.167104	0.237027	-0.705001	0.48081	NA	1.62803	0	1.10737	0	0	0	0.780256	0	0.336853
MSMEG_0398	6.89283	-0.415956	0.379597	-1.09578	0.273174	0.3796	0.44867	0.384832	1.16588	0.243661	0.381974	8.14016	6.17762	4.4295	5.80877	16.0209	9.86783	5.07166	3.4874	3.03167
MSMEG_0399	5800.7	-0.636091	0.143647	-4.42817	9.50378e-06	3.93942e-05	0.182397	0.14377	1.26868	0.204556	0.335983	6337.93	6577.1	5903.41	6727.72	8242.74	6487.39	3505.3	4939.33	3485.41
MSMEG_0400	39564.4	-0.218732	0.0781794	-2.79782	0.00514491	0.0126742	0.112204	0.0782509	1.4339	0.151601	0.267101	38647.9	41715.4	40752.5	42928	45615.4	42483.8	32071.3	37529.1	34336.7
MSMEG_0401	18432.7	-0.182502	0.0784142	-2.3274	0.0199438	0.042123	0.183499	0.0785598	2.33578	0.0195027	0.0510177	17838.4	18648.2	18486.5	19926.4	22379.1	20220.6	15200.2	17362.6	15832.1
MSMEG_0402	65882.3	0.0626832	0.066075	0.948667	0.34279	0.454242	0.26289	0.0661309	3.9753	7.02899e-05	0.0003622	59475.3	62017.1	61156.9	74052.5	74509	70890.5	59707.1	67578.9	63553.3
MSMEG_0403	6006.7	-0.0154639	0.0776368	-0.199183	0.84212	0.891513	0.372523	0.0780615	4.77217	1.82249e-06	1.27245e-05	5388.79	5558.83	5494.79	6822.98	7748.09	6787.66	5362.7	5170.66	5725.82
MSMEG_0404	1917.74	0.0196932	0.0923911	0.213151	0.831209	0.88295	0.58846	0.0932565	6.31012	2.7881e-10	3.46273e-09	1562.91	1758.56	1571.36	2417.61	2617.41	2378.15	1697.84	1493.77	1762.08
MSMEG_0405	413.68	0.239166	0.112638	2.12332	0.0337269	0.0665312	0.792034	0.115873	6.83538	8.1787e-12	1.22123e-10	306.07	321.236	318.924	616.891	556.725	484.933	376.864	351.065	390.412
MSMEG_0406	8207.38	-0.0612049	0.076685	-0.798134	0.424793	0.536503	-0.618191	0.0774562	-7.98118	1.44943e-15	3.42544e-14	9952.16	8833.99	9551.1	6005.11	5977.79	6392.94	8652.65	9646.16	8854.51
MSMEG_0407	27.2519	0.354236	0.269877	1.31258	0.189323	0.281797	-0.0285705	0.296037	-0.0965099	0.923116	0.955952	27.6766	19.5625	27.6844	13.9411	26.0339	33.8326	33.9411	27.8992	34.6958
MSMEG_0408	20484.5	1.21595	0.0675126	18.0107	1.60597e-72	5.86178e-70	0.940504	0.0677349	13.8851	7.80142e-44	1.55319e-41	11204.1	11949.6	11852.2	22886.6	21564.1	23069.6	28050.6	25652.2	28131.6
MSMEG_0409	2124.01	-0.224217	0.121925	-1.83897	0.0659195	0.118266	-0.00660416	0.122842	-0.0537615	0.957125	0.975386	2391.58	2084.95	2232.47	2227.08	2246.93	2200.53	1691.21	2313.31	1728.05
MSMEG_0410	2897.11	-0.213098	0.0855584	-2.49067	0.0127503	0.0286097	0.0254252	0.0865421	0.29379	0.768919	0.853686	2993.95	3082.63	2972.19	3070.52	3174.13	2971.63	2372.76	2887.57	2548.63
MSMEG_0411	1784.56	0.220253	0.0648146	3.3982	0.000678315	0.00202938	0.378542	0.0669366	5.65524	1.55628e-08	1.49049e-07	1566.17	1569.11	1498.28	2083.03	2002.61	1943.96	1791.47	1773.93	1832.48
MSMEG_0412	1662.81	0.175996	0.0750916	2.34375	0.0190912	0.0405526	0.253376	0.0772147	3.28145	0.00103274	0.00402199	1475	1476.45	1547	1871.59	1728.25	1766.34	1605.77	1797.18	1697.74
MSMEG_0413	65.0135	0.00124109	0.189915	0.006535	0.994786	0.996635	0.417152	0.202859	2.05637	0.0397469	0.0923399	50.469	68.9834	52.0466	67.3817	86.1122	85.9911	57.739	58.1234	58.2755
MSMEG_0414	75.6799	0.401419	0.205583	1.95259	0.050868	0.0945143	0.763245	0.215007	3.54986	0.000385436	0.00169499	48.841	68.9834	46.5097	92.9403	110.143	94.4492	83.0973	54.636	81.5183
MSMEG_0415	1083.27	0.114934	0.121726	0.944203	0.345066	0.456797	-0.2786	0.124596	-2.23602	0.0253502	0.0632197	1079.39	1159.33	1121.77	917.786	833.085	1002.29	1364.67	1000.88	1270.27
MSMEG_0416	122.027	0.128289	0.141603	0.905979	0.364947	0.47763	-0.159098	0.159916	-0.994884	0.319793	0.462988	120.474	114.286	131.778	95.2638	114.149	119.824	135.765	136.009	130.699
MSMEG_0417	24.87	0.526609	0.264359	1.99202	0.0463684	0.0873146	0.00565076	0.295682	0.0191109	0.984753	0.992304	26.0485	23.6809	15.5032	26.7203	16.0209	19.7357	34.7214	29.0617	32.3379
MSMEG_0419	14.3485	0.362413	0.344151	1.05306	0.292313	0.40027	0.674985	0.355881	1.89666	0.0578733	0.12541	8.14016	12.3552	7.75162	20.9116	24.0313	11.2775	11.3137	23.2494	10.1056
MSMEG_0420	3.88142	0.299628	0.39131	0.765705	0.443852	0.554697	0.266885	0.391333	0.681991	0.495245	0.63879	3.25607	3.08881	2.21475	4.64702	2.00261	5.63876	2.7309	6.97481	4.37908
MSMEG_0421	7.16061	0.301595	0.372187	0.810332	0.417749	0.529746	0.246247	0.384936	0.63971	0.522361	0.663171	1.62803	10.296	4.4295	8.13228	10.013	5.63876	7.41243	8.13727	8.75817
MSMEG_0422	389.206	0.314153	0.118379	2.65378	0.00795955	0.0187636	0.247756	0.124315	1.99297	0.0462649	0.104294	319.094	329.473	370.97	417.07	398.519	401.762	462.302	360.365	443.298
MSMEG_0423	99.8038	0.336041	0.160641	2.09187	0.0364501	0.0712305	0.122801	0.177676	0.691151	0.489471	0.633762	96.0539	84.4274	89.6973	106.881	90.1174	94.4492	124.061	95.3224	117.225
MSMEG_0424	194.961	0.689291	0.134649	5.11918	3.06875e-07	1.57513e-06	0.644605	0.143978	4.47711	7.56593e-06	4.74314e-05	162.803	131.789	124.026	209.116	246.321	207.224	229.005	209.244	235.123
MSMEG_0425	99.4329	-0.0750411	0.189411	-0.396182	0.691971	0.774621	0.0433547	0.200667	0.216053	0.828947	0.894681	100.938	100.901	99.6637	95.2638	122.159	97.2686	117.819	68.5856	92.2976
MSMEG_0426	22.579	0.31354	0.272395	1.15105	0.249713	0.353428	-0.680909	0.314749	-2.16334	0.0305151	0.0740614	26.0485	25.7401	21.0401	15.1028	16.0209	8.45814	37.4523	26.7368	26.6114
MSMEG_0428	8.20545	0.238912	0.359504	0.664559	0.506333	0.615468	0.182556	0.376574	0.484782	0.627831	0.749837	6.51213	10.296	4.4295	8.13228	10.013	8.45814	9.7532	5.81234	10.4424
MSMEG_0429	258.133	0.726621	0.136726	5.31445	1.06981e-07	5.87191e-07	0.725024	0.14339	5.05631	4.27437e-07	3.27303e-06	154.663	184.299	187.146	257.909	344.449	297.445	273.87	326.653	296.767
MSMEG_0430	325.658	0.361075	0.189151	1.90892	0.0562722	0.103155	0.363765	0.192697	1.88776	0.0590583	0.127633	257.229	296.526	259.126	367.114	342.446	355.242	383.106	227.844	442.288
MSMEG_0431	12.4216	-0.0526059	0.323271	-0.16273	0.870731	0.91036	-0.0951326	0.347349	-0.273881	0.784176	0.865192	13.0243	12.3552	14.3959	10.4558	12.0156	14.0969	13.6545	6.97481	14.8215
MSMEG_0432	25.156	0.128332	0.29713	0.431906	0.66581	0.752127	0.265327	0.312303	0.849584	0.395557	0.543797	22.7925	24.7105	19.9327	23.2351	40.0522	23.9647	23.4077	13.9496	34.359
MSMEG_0433	43.3819	-0.16475	0.220071	-0.748624	0.454084	0.564597	0.545945	0.23148	2.35849	0.0183493	0.0485129	37.4447	37.0657	38.7581	51.1172	74.0965	50.7488	34.3313	34.874	32.001
MSMEG_0434	382.252	-0.120265	0.130964	-0.918301	0.358461	0.471112	0.269872	0.13474	2.00291	0.0451873	0.102479	338.631	316.088	444.057	451.922	408.532	470.836	347.994	334.791	327.421
MSMEG_0435	684.429	-0.260683	0.151727	-1.7181	0.0857784	0.147222	0.378556	0.152998	2.47425	0.0133515	0.0367028	499.806	641.442	815.027	865.507	783.02	927.576	502.875	555.66	568.944
MSMEG_0436	602.153	-0.372265	0.12532	-2.9705	0.00297312	0.00772682	0.334506	0.127045	2.63298	0.00846404	0.0249032	493.294	596.14	692.109	757.464	688.897	819.03	434.603	459.175	478.668
MSMEG_0437	390.896	-0.648464	0.101759	-6.37252	1.85948e-10	1.45611e-09	-0.123906	0.1067	-1.16125	0.24554	0.384066	436.313	483.913	452.916	396.158	472.616	401.762	294.547	299.917	279.925
MSMEG_0438	317.608	-0.0888067	0.103163	-0.860836	0.389329	0.501842	0.171014	0.110095	1.55333	0.120345	0.224397	294.674	303.733	334.427	356.659	338.441	358.061	302.349	272.017	298.115
MSMEG_0439	71.3012	-0.0944296	0.182912	-0.516258	0.605674	0.702415	-0.949932	0.215707	-4.40382	1.06363e-05	6.42874e-05	76.5175	94.7235	94.1268	38.3379	50.0652	43.7004	95.9715	67.4231	80.8446
MSMEG_0440	28.6543	-0.292533	0.268651	-1.0889	0.276199	0.382671	-0.459828	0.293027	-1.56923	0.116593	0.218425	45.5849	33.9769	27.6844	23.2351	18.0235	29.6035	34.7214	17.437	27.6219
MSMEG_0441	312.567	0.0247157	0.0985762	0.250727	0.802025	0.860998	-0.60527	0.113165	-5.34856	8.86584e-08	7.59434e-07	353.283	348.006	354.36	230.027	202.263	249.515	358.138	366.177	351.337
MSMEG_0442	9.72732	0.445669	0.364537	1.22256	0.221496	0.320252	0.328049	0.378102	0.867621	0.385602	0.533685	4.8841	8.23682	7.75162	4.64702	8.01043	18.326	8.97295	16.2745	10.4424
MSMEG_0443	62.5293	-0.395396	0.182061	-2.17177	0.0298729	0.0598917	0.220616	0.194805	1.1325	0.257425	0.397481	70.0054	60.7466	62.0129	75.514	82.1069	69.0748	49.1561	47.6612	46.4857
MSMEG_0444	91.42	-0.64667	0.160383	-4.03203	5.52975e-05	0.000202286	0.149983	0.168995	0.887498	0.374811	0.522271	96.0539	110.167	94.1268	120.822	96.1252	115.595	62.8106	65.0982	61.9809
MSMEG_0445	356.174	0.206279	0.118509	1.74062	0.0817507	0.141603	0.331981	0.124112	2.67484	0.00747642	0.02246	302.814	319.177	314.494	378.732	438.571	376.387	392.079	308.054	375.254
MSMEG_0446	452.307	0.292371	0.115924	2.52209	0.0116658	0.0264201	0.31604	0.120829	2.6156	0.00890702	0.0260085	420.032	405.663	344.393	484.451	554.722	428.546	479.467	460.337	493.152
MSMEG_0447	131.085	-1.18935	0.140978	-8.43646	3.2709e-17	5.05643e-16	-0.247845	0.147531	-1.67995	0.0929676	0.182873	185.596	170.914	163.891	151.028	158.206	126.872	71.7836	79.0478	72.4233
MSMEG_0448	92.9827	0.165409	0.193023	0.856942	0.391477	0.503398	0.249257	0.204689	1.21773	0.223325	0.358389	100.938	74.1314	75.3014	102.234	116.151	81.762	83.8775	118.572	83.8763
MSMEG_0449	4049.65	-0.0138876	0.0987571	-0.140624	0.888167	0.9233	-0.340473	0.0997264	-3.41407	0.000639999	0.00265287	4540.58	4305.8	4274.46	3471.32	3410.44	3436.82	4019.88	5018.37	3969.14
MSMEG_0450	21.5669	-0.198871	0.310917	-0.639628	0.522415	0.628965	0.0427849	0.325508	0.13144	0.895427	0.940671	24.4205	16.4736	26.577	33.6909	22.0287	12.6872	13.2644	24.4118	20.548
MSMEG_0451	2067.28	-0.0570076	0.0760005	-0.750096	0.453197	0.563921	-0.42301	0.078605	-5.38147	7.38819e-08	6.42069e-07	2163.66	2262.04	2455.05	1726.37	1622.11	1766.34	2235.82	2116.85	2257.25
MSMEG_0452	79.8108	-0.287321	0.178181	-1.61253	0.106847	0.176823	-0.0451242	0.192863	-0.23397	0.815008	0.885644	100.938	87.5162	69.7646	70.867	90.1174	88.8104	66.7119	77.8853	65.6863
MSMEG_0454	308.663	0.132602	0.136423	0.971997	0.331052	0.441448	0.0393124	0.143094	0.274731	0.783523	0.864877	247.461	309.91	328.89	289.277	304.396	324.229	371.012	284.805	317.989
MSMEG_0455	311.984	0.506021	0.106269	4.76172	1.91953e-06	8.8812e-06	0.49733	0.114002	4.36248	1.28598e-05	7.61162e-05	250.717	228.572	251.374	327.615	350.456	360.881	339.802	333.628	364.811
MSMEG_0456	1576.55	-0.583505	0.114705	-5.08701	3.63759e-07	1.8512e-06	-0.55561	0.116474	-4.77026	1.83988e-06	1.28323e-05	1999.22	2079.8	2003.24	1445.22	1273.66	1378.68	1489.12	1098.53	1421.52
MSMEG_0457	919.328	-0.572689	0.107237	-5.34039	9.27492e-08	5.11639e-07	-0.548084	0.110503	-4.9599	7.05294e-07	5.23e-06	1235.68	1158.3	1139.49	803.934	821.069	772.51	885.981	668.419	788.572
MSMEG_0458	65.0998	-0.239331	0.184209	-1.29924	0.193862	0.287706	0.025955	0.20044	0.12949	0.89697	0.941389	63.4933	67.9538	74.1941	63.8965	70.0913	77.5329	58.9093	46.4987	63.3283
MSMEG_0459	22.1161	0.143848	0.268253	0.536242	0.591792	0.690476	-0.140566	0.299445	-0.469421	0.638769	0.758191	27.6766	19.5625	19.9327	19.7498	24.0313	15.5066	26.9188	22.0869	23.5797
MSMEG_0460	326.452	0.670845	0.143266	4.6825	2.83391e-06	1.27964e-05	0.44705	0.149289	2.99452	0.00274873	0.00949481	255.601	242.986	233.656	345.041	356.464	308.722	347.604	488.236	359.759
MSMEG_0461	26.3899	0.0498079	0.260943	0.190876	0.848622	0.895337	0.261173	0.280874	0.929859	0.352444	0.498291	24.4205	23.6809	25.4696	31.3674	28.0365	31.0132	30.8201	17.437	25.264
MSMEG_0462	12.8853	-0.112318	0.32536	-0.34521	0.729936	0.805591	0.0925882	0.345543	0.26795	0.788738	0.86859	14.6523	9.26642	14.3959	9.29403	16.0209	16.9163	11.7038	13.9496	9.76873
MSMEG_0463	113.718	-0.300171	0.158541	-1.89334	0.058313	0.106333	0.255713	0.167371	1.52782	0.126557	0.232581	120.474	116.345	101.878	141.734	134.175	129.691	88.5591	110.434	80.1709
MSMEG_0464	1028.31	-0.45468	0.0810511	-5.60979	2.02569e-08	1.20769e-07	-0.789261	0.0862763	-9.14807	5.79612e-20	2.04734e-18	1302.43	1327.16	1395.29	788.831	738.962	782.378	1043.98	916.025	959.693
MSMEG_0465	338.758	-0.0250168	0.1419	-0.176299	0.860059	0.902218	0.126169	0.146749	0.859763	0.38992	0.538075	314.21	336.68	335.534	384.541	354.462	341.145	312.883	399.889	269.482
MSMEG_0466	210.874	1.16685	0.133942	8.71161	2.99587e-18	5.07291e-17	0.639914	0.14554	4.39684	1.0984e-05	6.60852e-05	131.871	117.375	137.314	195.175	234.305	187.489	280.502	325.491	288.346
MSMEG_0467	7.27351	-0.173492	0.372365	-0.46592	0.641273	0.732724	0.109342	0.38306	0.285445	0.775303	0.85811	3.25607	10.296	7.75162	6.97053	14.0183	5.63876	6.63218	3.4874	7.41076
MSMEG_0468	1.51474	0.337867	0.363199	0.930253	0.35224	NA	-0.0442007	0.337751	-0.130868	0.89588	NA	0	2.05921	1.10737	1.16175	0	1.40969	1.56051	4.64987	1.68426
MSMEG_0469	41.187	-0.0413862	0.236208	-0.175211	0.860914	0.902826	-0.295619	0.26	-1.137	0.25554	0.395221	42.3288	56.6282	34.3286	44.1467	32.0417	28.1938	39.7931	53.4735	39.7486
MSMEG_0470	18.0922	0.889132	0.29205	3.04445	0.00233108	0.00625366	0.304359	0.323646	0.940406	0.347009	0.492941	11.3962	12.3552	13.2885	16.2646	12.0156	19.7357	24.5781	25.5743	27.6219
MSMEG_0471	26.9181	0.141535	0.263853	0.536417	0.59167	0.690476	0.0134772	0.287893	0.0468131	0.962662	0.978903	29.3046	25.7401	24.3622	25.5586	24.0313	29.6035	33.551	17.437	32.6747
MSMEG_0472	12.1365	0.313559	0.333382	0.940539	0.346941	0.458633	0.431614	0.352062	1.22596	0.220214	0.354783	14.6523	7.20722	7.75162	15.1028	8.01043	18.326	13.2644	12.7871	12.1267
MSMEG_0473	33.9321	0.572462	0.270253	2.11824	0.0341544	0.0672443	-0.063628	0.294919	-0.215747	0.829185	0.894686	32.5607	28.8289	24.3622	20.9116	26.0339	33.8326	44.0845	62.7733	32.001
MSMEG_0474	24.2088	0.874133	0.300474	2.90918	0.00362376	0.00926387	0.936107	0.315065	2.97116	0.0029668	0.0101151	14.6523	13.3848	13.2885	32.5291	18.0235	40.881	37.0622	19.762	28.2956
MSMEG_0475	22.3246	0.978947	0.28843	3.39406	0.000688658	0.00205658	0.622252	0.312282	1.9926	0.0463057	0.104331	8.14016	16.4736	14.3959	27.8821	16.0209	23.9647	26.5287	37.199	30.3167
MSMEG_0476	37.8586	0.813986	0.267086	3.04766	0.0023063	0.00620237	0.591724	0.284182	2.0822	0.0373242	0.0876413	22.7925	28.8289	21.0401	25.5586	52.0678	45.1101	42.1338	62.7733	40.4223
MSMEG_0477	18.9884	0.212151	0.326179	0.650412	0.515426	0.622835	0.296271	0.340404	0.87035	0.384109	0.532292	9.7682	23.6809	13.2885	27.8821	24.0313	11.2775	15.215	27.8992	17.8532
MSMEG_0478	84.0236	0.706674	0.19322	3.65735	0.000254837	0.000830083	0.718287	0.205693	3.49203	0.000479368	0.00205577	56.9811	57.6578	55.3687	102.234	102.133	87.4008	78.0256	119.734	96.6767
MSMEG_0479	40.143	1.08229	0.233147	4.64208	3.44914e-06	1.53529e-05	0.987953	0.252408	3.91411	9.07399e-05	0.000457179	21.1644	18.5328	25.4696	46.4702	54.0704	43.7004	51.887	51.1486	48.8436
MSMEG_0480	60.5282	0.694362	0.226576	3.06458	0.00217976	0.00588132	0.73105	0.239517	3.05218	0.00227183	0.00808993	48.841	31.9177	40.9728	65.0582	72.0939	74.7136	56.1784	92.9974	61.9809
MSMEG_0481	15.8716	0.269738	0.3175	0.849569	0.395565	0.507049	0.159632	0.339266	0.470521	0.637983	0.757892	13.0243	13.3848	14.3959	18.5881	14.0183	14.0969	12.094	26.7368	16.5058
MSMEG_0482	55.8718	0.740803	0.20881	3.54773	0.00038856	0.00122851	0.620143	0.226742	2.73502	0.00623769	0.0191324	43.9569	43.2433	28.7917	54.6024	62.0809	69.0748	61.2501	67.4231	72.4233
MSMEG_0483	57.8742	0.474022	0.199259	2.37893	0.017363	0.037316	0.482835	0.217017	2.22487	0.0260899	0.0647565	40.7008	43.2433	48.7245	55.7642	66.0861	71.8942	57.739	74.3979	62.3177
MSMEG_0484	184.511	0.909219	0.151869	5.98688	2.1391e-09	1.45636e-08	0.56795	0.162073	3.50429	0.000457824	0.00197889	113.962	118.404	140.637	211.439	150.196	197.357	229.395	273.18	226.028
MSMEG_0485	93.1062	1.01782	0.185677	5.48168	4.21313e-08	2.42596e-07	0.827124	0.199177	4.1527	3.28569e-05	0.000180795	61.8652	55.5985	49.8318	97.5874	114.149	98.6783	111.186	145.308	103.751
MSMEG_0486	42.5943	0.381373	0.257079	1.48349	0.137945	0.218333	0.472551	0.271047	1.74343	0.0812583	0.164867	39.0728	35.0065	25.4696	47.6319	52.0678	45.1101	31.6004	63.9357	43.454
MSMEG_0487	14.6765	0.601686	0.31827	1.89049	0.0586926	0.106906	0.601929	0.338675	1.77731	0.0755179	0.15529	6.51213	10.296	12.1811	16.2646	18.0235	18.326	14.8249	15.1121	20.548
MSMEG_0488	11.0294	0.422248	0.346163	1.2198	0.222542	0.321407	0.442597	0.363433	1.21782	0.223291	0.358389	8.14016	7.20722	8.85899	8.13228	10.013	19.7357	9.7532	13.9496	13.4741
MSMEG_0489	278.584	1.06685	0.127753	8.35087	6.7763e-17	1.02345e-15	0.578157	0.136973	4.22094	2.43285e-05	0.000137318	185.596	183.269	169.428	297.409	258.336	253.744	366.33	437.088	356.053
MSMEG_0490	168.126	0.540332	0.164547	3.28374	0.00102438	0.00294794	0.594073	0.172408	3.44573	0.000569516	0.00239661	140.011	119.434	116.274	175.425	254.331	155.066	188.822	180.183	183.585
MSMEG_0491	864.406	-0.304491	0.107856	-2.82311	0.00475598	0.0118091	-0.102627	0.110559	-0.928256	0.353275	0.499143	991.472	962.679	883.685	856.213	947.234	838.765	720.957	877.663	700.99
MSMEG_0492	86.2854	0.341284	0.175413	1.94561	0.051702	0.0957661	-0.176249	0.196802	-0.895563	0.370486	0.517672	81.4016	80.309	86.3752	81.3228	68.0887	66.2554	122.89	87.1851	102.74
MSMEG_0493	54.8887	0.43043	0.246157	1.7486	0.0803601	0.139637	-0.524381	0.270749	-1.93678	0.0527725	0.116387	68.3774	39.1249	55.3687	37.1761	26.0339	39.4713	71.3934	101.135	55.9175
MSMEG_0494	27.7479	-0.764579	0.254026	-3.00984	0.00261384	0.0069325	-0.306568	0.273788	-1.11973	0.262831	0.403269	39.0728	28.8289	38.7581	22.0733	26.0339	35.2422	17.9459	23.2494	18.5269
MSMEG_0495	58.5376	-0.197173	0.190084	-1.03729	0.299599	0.408205	-0.285799	0.212985	-1.34187	0.179638	0.303555	56.9811	64.865	73.0867	47.6319	70.0913	45.1101	58.5192	54.636	55.9175
MSMEG_0496	18.9051	-0.418472	0.301332	-1.38874	0.164911	0.252615	-0.123112	0.319592	-0.385216	0.700078	0.804251	19.5364	16.4736	29.8991	22.0733	24.0313	14.0969	17.5558	9.29974	17.1795
MSMEG_0497	123.799	-0.376468	0.142262	-2.6463	0.00813766	0.0191492	-0.231114	0.156661	-1.47525	0.140145	0.251641	161.175	131.789	135.1	115.014	138.18	109.956	110.406	105.785	106.782
MSMEG_0498	7.78318	-0.00911312	0.376015	-0.0242361	0.980664	0.986067	-0.385623	0.387717	-0.994599	0.319931	0.463086	14.6523	5.14801	8.85899	5.80877	2.00261	8.45814	12.8742	3.4874	8.75817
MSMEG_0499	41.1785	-0.976939	0.256437	-3.80967	0.000139154	0.000474686	-0.833487	0.275026	-3.03058	0.00244088	0.00859178	65.1213	73.1018	48.7245	39.4996	18.0235	35.2422	26.1386	41.8488	22.906
MSMEG_0500	219.795	-1.24078	0.392404	-3.162	0.00156692	0.00435661	-0.590683	0.392435	-1.50517	0.132279	0.240808	356.539	405.663	421.91	80.161	444.579	52.1585	74.9046	65.0982	77.1393
MSMEG_0501	63.3183	-0.384092	0.186555	-2.05886	0.0395076	0.0762529	-0.397092	0.20831	-1.90625	0.0566172	0.123252	73.2615	70.013	81.9457	49.9554	74.0965	47.9294	56.1784	63.9357	52.549
MSMEG_0502	106.46	-0.208595	0.151429	-1.37751	0.168355	0.256515	-0.576542	0.173345	-3.32598	0.000881071	0.00348923	146.523	121.493	115.167	94.1021	74.0965	77.5329	108.065	117.409	103.751
MSMEG_0503	25.7531	0.365695	0.262469	1.39329	0.163532	0.251029	0.121888	0.289847	0.420525	0.674102	0.784979	19.5364	21.6217	24.3622	23.2351	30.0391	21.1453	26.5287	38.3614	26.9482
MSMEG_0504	23.7689	0.384403	0.263327	1.4598	0.144346	0.226089	-0.0386107	0.294713	-0.131011	0.895767	0.940877	16.2803	21.6217	26.577	22.0733	18.0235	22.555	30.0399	24.4118	32.3379
MSMEG_0505	74.2088	-0.0438331	0.178534	-0.245518	0.806056	0.864054	-0.348753	0.201455	-1.73117	0.083422	0.16802	92.7979	73.1018	77.5162	51.1172	66.0861	70.4845	78.0256	88.3475	70.4022
MSMEG_0506	24.8549	-0.221569	0.258695	-0.856488	0.391728	0.503398	-0.417356	0.289942	-1.43945	0.150024	0.26482	34.1887	25.7401	27.6844	20.9116	24.0313	16.9163	19.8965	29.0617	25.264
MSMEG_0507	15.5687	-0.515029	0.291695	-1.76564	0.0774558	0.135572	-0.561347	0.324042	-1.73233	0.0832155	0.167857	21.1644	20.5921	19.9327	12.7793	12.0156	12.6872	14.0446	15.1121	11.7898
MSMEG_0508	24.249	-0.119528	0.270997	-0.441068	0.659164	0.74603	-0.243579	0.297211	-0.819548	0.412474	0.560255	30.9326	24.7105	25.4696	24.3968	26.0339	15.5066	20.2867	20.9244	29.9799
MSMEG_0509	9.47864	0.100625	0.363041	0.277173	0.781647	0.84687	-0.207154	0.379334	-0.546098	0.584999	0.716793	17.9084	5.14801	7.75162	6.97053	4.00522	11.2775	12.8742	11.6247	7.74761
MSMEG_0510	5.36041	-0.190885	0.388888	-0.490848	0.623534	0.71716	0.395097	0.392134	1.00756	0.313668	0.456645	9.7682	4.11841	1.10737	10.4558	6.00782	5.63876	4.29141	3.4874	3.36853
MSMEG_0511	4.26364	0.68448	0.389812	1.75592	0.0791013	0.13785	1.15439	0.388337	2.97264	0.00295249	0.010082	1.62803	0	1.10737	5.80877	10.013	8.45814	3.12102	1.16247	7.07391
MSMEG_0512	11.968	0.147801	0.343811	0.429891	0.667275	0.753005	0.330336	0.359401	0.919129	0.358028	0.504124	16.2803	5.14801	9.96637	12.7793	20.0261	9.86783	10.5335	9.29974	13.811
MSMEG_0513	7.5781	0.717747	0.38495	1.86452	0.0622487	0.11258	0.862129	0.390315	2.2088	0.0271884	0.0671028	4.8841	4.11841	1.10737	3.48526	20.0261	9.86783	10.1433	5.81234	8.75817
MSMEG_0514	20.926	0.791783	0.288585	2.74367	0.0060756	0.0147185	0.730406	0.30979	2.35775	0.0183863	0.0485717	9.7682	15.444	13.2885	31.3674	22.0287	19.7357	27.6991	24.4118	24.5902
MSMEG_0515	44.8178	0.875777	0.22442	3.9024	9.52417e-05	0.000334977	0.940339	0.241299	3.89698	9.73996e-05	0.000488112	26.0485	25.7401	27.6844	56.926	46.06	60.6167	49.1561	61.6108	49.5173
MSMEG_0516	13.7891	1.00076	0.333636	2.99957	0.00270361	0.0071424	0.900656	0.351892	2.55947	0.0104833	0.0298938	6.51213	8.23682	5.53687	20.9116	16.0209	12.6872	20.2867	19.762	14.1478
MSMEG_0517	18.3199	1.0052	0.311762	3.22427	0.00126296	0.00356276	1.14185	0.327713	3.48429	0.000493437	0.0021106	6.51213	7.20722	12.1811	26.7203	26.0339	22.555	21.457	16.2745	25.9377
MSMEG_0518	65.8547	0.630022	0.196482	3.20652	0.00134353	0.00377867	0.467455	0.214161	2.18272	0.0290562	0.0709926	47.2129	55.5985	43.1876	78.9993	66.0861	62.0263	76.8552	92.9974	69.7285
MSMEG_0519	10.9356	0.493693	0.339494	1.4542	0.145891	0.227835	0.592993	0.358431	1.65441	0.0980439	0.190746	8.14016	6.17762	7.75162	12.7793	16.0209	11.2775	10.5335	13.9496	11.7898
MSMEG_0520	37.0968	0.180675	0.249359	0.724557	0.468724	0.578639	0.0989253	0.269154	0.367541	0.713215	0.813088	47.2129	27.7993	31.0065	45.3084	22.0287	40.881	34.3313	41.8488	43.454
MSMEG_0521	254.16	0.156221	0.126241	1.23748	0.215909	0.313763	-0.0160253	0.135621	-0.118162	0.905939	0.946117	203.504	257.401	273.521	243.968	226.295	259.383	293.766	255.743	273.861
MSMEG_0522	104.966	0.676214	0.206958	3.26739	0.00108543	0.00311274	0.0499307	0.221348	0.225576	0.821531	0.890376	94.4259	84.4274	75.3014	88.2933	88.1148	85.9911	111.577	195.295	121.267
MSMEG_0523	141.489	0.224089	0.16358	1.3699	0.170718	0.259694	0.131499	0.174736	0.752561	0.451714	0.599669	115.59	115.316	155.032	141.734	126.164	156.476	141.616	181.345	140.131
MSMEG_0524	20.5981	0.411504	0.287852	1.42957	0.15284	0.237054	0.564424	0.307577	1.83506	0.0664961	0.14016	13.0243	14.4144	17.718	24.3968	26.0339	23.9647	17.1656	24.4118	24.2534
MSMEG_0525	0.650126	-0.0321269	0.267744	-0.119991	0.90449	NA	0.224616	0.252804	0.888498	0.374273	NA	0	0	1.10737	2.32351	0	1.40969	0	0	1.01056
MSMEG_0526	37.4778	-0.506076	0.261595	-1.93458	0.0530419	0.0980267	-0.0509828	0.274155	-0.185963	0.852474	0.909951	37.4447	54.5689	35.436	26.7203	52.0678	47.9294	32.3806	19.762	30.9904
MSMEG_0527	7.37966	-0.0346732	0.363603	-0.09536	0.924029	0.949464	-0.327601	0.38257	-0.856317	0.391823	0.540133	6.51213	10.296	7.75162	8.13228	4.00522	4.22907	7.80256	11.6247	6.06335
MSMEG_0528	8.51875	0.127354	0.377989	0.336925	0.736173	0.809889	0.351775	0.385346	0.912882	0.361305	0.50734	3.25607	7.20722	9.96637	6.97053	18.0235	8.45814	11.7038	2.32494	8.75817
MSMEG_0529	250.175	-0.970102	0.146923	-6.6028	4.03472e-11	3.42925e-10	-0.780386	0.154737	-5.04329	4.57583e-07	3.48761e-06	437.941	355.213	297.884	183.557	230.3	208.634	192.333	170.883	174.827
MSMEG_0530	1018.11	-0.830558	0.146864	-5.65528	1.55593e-08	9.43034e-08	-0.502542	0.148444	-3.38539	0.000710762	0.00289864	1608.5	1275.68	1191.53	895.712	987.286	954.36	663.218	918.35	668.316
MSMEG_0531	2164.21	-0.247536	0.0834467	-2.96639	0.00301317	0.00781853	0.196784	0.0845209	2.32822	0.0199002	0.051821	2061.09	2206.44	2250.18	2394.38	2455.2	2638.94	1835.55	1684.42	1951.72
MSMEG_0532	648.751	-0.376039	0.185671	-2.0253	0.0428369	0.081766	0.621243	0.186132	3.33764	0.000844935	0.0033676	584.464	566.282	594.66	878.286	937.221	943.082	345.653	632.382	356.727
MSMEG_0533	130.545	-0.823496	0.175398	-4.69502	2.66586e-06	1.20708e-05	0.112136	0.179409	0.625031	0.531951	0.671196	140.011	169.884	135.1	194.013	170.222	119.824	77.6355	86.0226	82.1921
MSMEG_0534	346.075	-0.191199	0.107471	-1.77908	0.0752274	0.132151	0.139957	0.113275	1.23555	0.216624	0.350892	361.423	361.391	322.246	388.026	368.48	393.303	280.502	334.791	304.515
MSMEG_0535	890.341	0.179759	0.158554	1.13374	0.256905	0.361041	0.235201	0.160231	1.46789	0.142135	0.253965	856.345	738.225	812.813	985.168	1001.3	866.959	758.409	1196.18	797.667
MSMEG_0536	2870.76	0.606443	0.111241	5.45162	4.99118e-08	2.83914e-07	0.239092	0.112318	2.12871	0.0332781	0.0796201	2401.35	2125.1	2418.5	2961.31	2571.35	2684.05	3165.89	4076.77	3432.53
MSMEG_0537	1603.37	1.31615	0.179468	7.3336	2.24054e-13	2.47401e-12	0.943105	0.180404	5.22774	1.71596e-07	1.40747e-06	1025.66	723.811	819.457	2280.52	1327.73	1512.6	2117.23	2366.78	2256.58
MSMEG_0538	3067.34	1.13595	0.197882	5.74052	9.43885e-09	5.88361e-08	0.730448	0.198324	3.68311	0.000230406	0.00106155	2124.58	1610.3	1731.93	3905.82	2493.25	3009.69	3480.33	5721.67	3528.53
MSMEG_0539	439.454	-0.832474	0.133698	-6.22651	4.76931e-10	3.51676e-09	-0.544382	0.138037	-3.94374	8.02208e-05	0.000409201	638.189	604.377	529.325	433.334	392.511	370.748	284.793	392.914	308.894
MSMEG_0540	165.776	0.360027	0.142978	2.51806	0.0118003	0.0267062	0.139362	0.155287	0.897453	0.369477	0.516592	161.175	129.73	148.388	139.411	180.235	167.753	172.046	191.807	201.438
MSMEG_0541	53.0402	-0.441506	0.191059	-2.31084	0.0208418	0.0437338	-0.480555	0.216478	-2.21987	0.0264273	0.0654457	60.2372	67.9538	67.5498	42.9849	54.0704	42.2907	51.4969	47.6612	43.1171
MSMEG_0542	259.34	-0.587651	0.112051	-5.24451	1.56695e-07	8.37366e-07	-0.45661	0.121937	-3.74463	0.000180658	0.000850232	328.863	350.065	298.991	214.925	238.31	256.564	214.57	218.544	213.228
MSMEG_0543	33.6762	-0.277049	0.226466	-1.22336	0.221193	0.319886	-0.0595056	0.249525	-0.238475	0.811512	0.883453	32.5607	36.0361	39.8655	34.8526	36.0469	33.8326	27.6991	32.5491	29.643
MSMEG_0544	115.862	-0.277705	0.15099	-1.83923	0.065881	0.118253	-0.0475563	0.163734	-0.290449	0.771473	0.855745	126.987	140.026	108.523	125.469	106.138	128.282	108.846	101.135	97.3504
MSMEG_0545	84.1493	0.0993157	0.173005	0.574062	0.565926	0.667484	0.726568	0.182102	3.9899	6.61011e-05	0.000342225	73.2615	67.9538	58.6908	108.043	112.146	118.414	70.6132	82.5352	65.6863
MSMEG_0546	318.42	0.573965	0.128709	4.4594	8.21909e-06	3.43508e-05	0.966396	0.132804	7.27685	3.41693e-13	6.13367e-12	190.48	234.749	208.186	441.467	370.483	452.51	293.376	356.878	317.652
MSMEG_0547	12.5816	-0.229146	0.343246	-0.667583	0.5044	0.613686	-0.149016	0.359997	-0.413936	0.678921	0.788165	19.5364	9.26642	14.3959	15.1028	16.0209	5.63876	15.215	9.29974	8.75817
MSMEG_0548	50.5095	-0.137945	0.220602	-0.62531	0.531767	0.637422	0.166859	0.235004	0.710024	0.477689	0.62332	37.4447	46.3321	65.3351	59.2495	56.073	56.3876	53.4475	37.199	43.1171
MSMEG_0549	168.718	1.82061	0.196509	9.26476	1.95514e-20	4.01416e-19	0.686744	0.208362	3.29592	0.000980997	0.00383184	83.0297	83.3978	67.5498	131.278	120.156	139.559	372.572	215.057	305.862
MSMEG_0550	302.214	1.62184	0.137245	11.8171	3.18415e-32	1.46293e-30	0.823736	0.146238	5.63286	1.77246e-08	1.68525e-07	169.315	150.322	137.314	261.395	248.323	310.132	537.596	433.6	471.931
MSMEG_0551	143.171	1.8501	0.153475	12.0547	1.83152e-33	9.18556e-32	1.23267	0.16753	7.35789	1.86837e-13	3.44809e-12	65.1213	54.5689	58.6908	145.219	158.206	135.33	233.687	215.057	222.66
MSMEG_0552	220.642	2.15583	0.151999	14.1832	1.16497e-45	1.2149e-43	1.17691	0.163493	7.1985	6.088e-13	1.06378e-11	91.1698	86.4866	69.7646	178.91	188.245	214.273	416.267	337.116	403.55
MSMEG_0553	53.4988	2.08178	0.257667	8.07935	6.51136e-16	9.02524e-15	1.30081	0.274565	4.73772	2.16133e-06	1.49568e-05	6.51213	25.7401	17.718	56.926	38.0496	59.207	107.675	79.0478	90.6134
MSMEG_0554	7.95238	0.420024	0.366972	1.14457	0.252389	0.356065	0.615946	0.379232	1.6242	0.104334	0.200666	6.51213	3.08881	6.64424	13.9411	10.013	7.04845	9.7532	5.81234	8.75817
MSMEG_0555	7.38007	0.454502	0.379658	1.19714	0.231253	0.332095	0.546538	0.387882	1.40903	0.158826	0.276128	1.62803	7.20722	4.4295	4.64702	18.0235	7.04845	8.19269	5.81234	9.43188
MSMEG_0556	10.8007	0.789414	0.360247	2.19131	0.0284291	0.0573646	0.521709	0.37482	1.39189	0.163956	0.283024	8.14016	3.08881	8.85899	19.7498	8.01043	5.63876	13.2644	13.9496	16.5058
MSMEG_0557	2038.49	-1.54796	0.150834	-10.2627	1.03818e-24	2.81852e-23	-0.0195443	0.150628	-0.129752	0.896763	0.941389	2754.63	2645.05	2523.71	2558.18	2913.79	2344.31	706.132	1111.32	789.246
MSMEG_0558	1460.94	-1.07219	0.11072	-9.68378	3.53399e-22	8.35191e-21	0.275937	0.110666	2.49341	0.0126522	0.0350001	1422.9	1756.5	1710.89	1856.48	2176.84	1928.46	696.379	793.965	806.088
MSMEG_0559	9575.16	-0.684993	0.205976	-3.32559	0.000882302	0.00257518	-0.378638	0.206075	-1.83737	0.0661549	0.139665	11194.4	12637.3	12801.2	8675.98	9656.58	9264.48	5023.68	10874.9	6047.85
MSMEG_0561	36.4004	-0.110719	0.232021	-0.477193	0.633224	0.72557	0.352898	0.247507	1.42581	0.153923	0.270033	27.6766	35.0065	38.7581	49.9554	42.0548	42.2907	35.1115	24.4118	32.3379
MSMEG_0562	285.936	0.0075413	0.132666	0.0568441	0.954669	0.969575	-0.194036	0.141004	-1.37611	0.168789	0.289059	271.881	312.999	312.279	289.277	248.323	242.467	337.071	252.256	306.873
MSMEG_0563	224.505	0.671129	0.178582	3.75811	0.000171204	0.000574175	0.160849	0.186486	0.862528	0.388397	0.536875	149.779	177.092	211.508	223.057	166.216	215.683	341.752	223.194	312.262
MSMEG_0564	297.636	0.291464	0.116365	2.50474	0.0122543	0.02761	0.35889	0.123453	2.9071	0.00364797	0.012123	224.668	269.756	263.555	311.35	316.412	356.651	296.107	305.729	334.495
MSMEG_0565	89.2215	0.526197	0.212537	2.4758	0.0132939	0.0296473	1.02901	0.218978	4.69912	2.6128e-06	1.77887e-05	53.7251	67.9538	47.6171	119.661	136.177	117.004	64.3711	111.597	84.8869
MSMEG_0566	111.742	0.933092	0.188596	4.94756	7.51503e-07	3.66274e-06	1.01461	0.197484	5.13767	2.78165e-07	2.17824e-06	56.9811	80.309	56.4761	144.058	116.151	153.656	114.308	158.096	125.646
MSMEG_0567	24.883	0.819267	0.311187	2.63272	0.00847043	0.0198257	0.22833	0.330496	0.690871	0.489647	0.633762	21.1644	15.444	17.718	22.0733	6.00782	35.2422	44.8647	26.7368	34.6958
MSMEG_0568	5.44385	0.404518	0.382669	1.0571	0.290467	0.398491	0.505889	0.390928	1.29407	0.19564	0.324012	1.62803	5.14801	3.32212	4.64702	8.01043	8.45814	6.24205	5.81234	5.7265
MSMEG_0569	14.367	0.170261	0.330392	0.515329	0.606323	0.702937	0.306191	0.347455	0.881241	0.378188	0.52575	11.3962	12.3552	12.1811	10.4558	14.0183	23.9647	10.5335	20.9244	13.4741
MSMEG_0570	1.30969	0.110875	0.323167	0.343089	0.731531	NA	0.444257	0.307866	1.44302	0.149014	NA	1.62803	0	0	0	2.00261	5.63876	1.17038	0	1.34741
MSMEG_0571	6.89068	0.0308183	0.375273	0.0821223	0.934549	0.956436	0.418143	0.384719	1.08688	0.27709	0.417925	3.25607	8.23682	4.4295	6.97053	14.0183	7.04845	4.68154	6.97481	6.4002
MSMEG_0572	4.25369	-0.0745435	0.390816	-0.190738	0.848731	0.895337	0.368561	0.392757	0.938394	0.348042	0.493874	1.62803	5.14801	3.32212	5.80877	8.01043	4.22907	4.29141	3.4874	2.35797
MSMEG_0573	3.0093	-0.456816	0.39227	-1.16455	0.244203	0.347426	-0.381762	0.385512	-0.990273	0.322041	0.465524	3.25607	5.14801	4.4295	3.48526	2.00261	1.40969	1.17038	3.4874	2.69482
MSMEG_0574	133.607	-0.4893	0.1774	-2.75817	0.00581266	0.0141651	0.834923	0.178045	4.6894	2.74006e-06	1.85208e-05	89.5418	140.026	105.201	191.689	250.326	187.489	82.7071	81.3727	74.1076
MSMEG_0575	154.885	-1.14637	0.17704	-6.47524	9.46609e-11	7.7066e-10	-1.68868	0.196239	-8.60521	7.61764e-18	2.2443e-16	333.747	266.667	213.723	87.1316	60.0782	80.3523	124.841	126.709	100.719
MSMEG_0576	697.883	-1.49661	0.0948472	-15.7791	4.33255e-56	7.49076e-54	-1.50628	0.101838	-14.791	1.6744e-49	4.23109e-47	1266.61	1178.9	1261.3	451.922	380.496	441.233	438.504	463.825	398.16
MSMEG_0577	52.2253	-0.846856	0.196116	-4.31813	1.57354e-05	6.33466e-05	-0.597175	0.217645	-2.7438	0.00607317	0.0187768	78.1456	65.8946	75.3014	52.2789	38.0496	46.5198	36.672	33.7116	43.454
MSMEG_0578	33.4139	-0.150916	0.253744	-0.594757	0.552006	0.655582	0.07554	0.271265	0.278473	0.780649	0.862429	24.4205	40.1545	35.436	44.1467	42.0548	22.555	26.9188	33.7116	31.3273
MSMEG_0579	74.7947	-0.250361	0.187544	-1.33495	0.181894	0.273341	-0.221754	0.204404	-1.08488	0.277973	0.418681	78.1456	100.901	73.0867	69.7053	74.0965	71.8942	78.4157	53.4735	73.4339
MSMEG_0580	555.162	-1.34914	0.0966057	-13.9654	2.53428e-44	2.44856e-42	-1.22545	0.103741	-11.8126	3.35922e-32	3.15287e-30	866.113	923.554	964.523	348.526	418.545	403.171	337.461	375.477	359.085
MSMEG_0582	46.5331	-1.72272	0.242305	-7.10973	1.16273e-12	1.19176e-11	-1.49068	0.264849	-5.62841	1.81875e-08	1.72194e-07	71.6334	85.457	106.308	16.2646	42.0548	28.1938	20.6768	20.9244	27.2851
MSMEG_0583	22.1307	-0.539991	0.303631	-1.77845	0.0753307	0.132297	0.349617	0.311544	1.12221	0.261775	0.402154	22.7925	15.444	28.7917	31.3674	42.0548	18.326	15.6051	9.29974	15.4952
MSMEG_0584	2069.23	0.450468	0.164763	2.73405	0.00625612	0.0151169	1.94078	0.164655	11.7869	4.55943e-32	4.21908e-30	744.011	949.294	1173.82	3896.52	3929.12	3934.44	1070.9	1604.21	1320.8
MSMEG_0585	21.3101	-0.150865	0.284274	-0.530705	0.595623	0.694084	0.40894	0.299446	1.36566	0.172047	0.293141	26.0485	19.5625	13.2885	23.2351	34.0443	25.3744	17.9459	15.1121	17.1795
MSMEG_0586	3335.14	0.644923	0.179353	3.59584	0.00032335	0.00103478	2.16655	0.179284	12.0845	1.27616e-33	1.31006e-31	984.96	1365.25	1644.45	6544.16	6522.5	6522.63	1609.67	2494.66	2327.99
MSMEG_0588	79.5751	-0.150961	0.183429	-0.822992	0.410512	0.522687	0.816167	0.188868	4.32136	1.55073e-05	9.09671e-05	53.7251	61.7762	74.1941	120.822	112.146	115.595	53.4475	70.9105	53.5596
MSMEG_0592	103.925	0.613685	0.182604	3.36075	0.000777305	0.00229953	0.313275	0.196537	1.59398	0.110942	0.210167	81.4016	83.3978	80.8383	95.2638	106.138	109.956	153.32	95.3224	129.688
MSMEG_0593	143.629	0.323616	0.161746	2.00077	0.0454173	0.0858434	-0.363599	0.178613	-2.03568	0.0417826	0.0959411	177.456	128.7	125.133	92.9403	102.133	131.101	190.773	166.233	178.195
MSMEG_0594	550.396	0.073813	0.154231	0.478587	0.632233	0.724955	-0.680035	0.159764	-4.25649	2.07666e-05	0.000118332	805.876	511.713	548.15	384.541	366.477	382.026	719.006	602.158	633.62
MSMEG_0595	360.299	-0.0403731	0.191123	-0.211242	0.832699	0.884103	-1.1164	0.199157	-5.60564	2.07484e-08	1.94183e-07	621.908	346.976	382.044	187.042	188.245	208.634	431.482	506.836	369.527
MSMEG_0596	36.1707	0.156555	0.342764	0.456742	0.647856	0.737297	-0.8997	0.355954	-2.52757	0.0114855	0.0321926	76.5175	31.9177	22.1475	13.9411	18.0235	19.7357	69.4428	20.9244	52.8859
MSMEG_0597	265.805	0.387564	0.131569	2.94571	0.00322215	0.00831156	0.504515	0.13801	3.65564	0.000256544	0.00117129	203.504	198.713	234.763	336.909	264.344	307.312	291.816	302.242	252.64
MSMEG_0598	112.747	-0.467091	0.179797	-2.59788	0.00938005	0.0217226	-0.307163	0.191174	-1.60672	0.108116	0.206162	143.267	132.819	131.778	94.1021	112.146	119.824	113.137	66.2607	101.393
MSMEG_0599	259.33	-0.410354	0.115973	-3.53835	0.000402637	0.00126692	-0.35455	0.125643	-2.82189	0.00477418	0.015219	327.235	298.585	301.206	267.203	238.31	210.044	241.099	231.331	218.954
MSMEG_0600	694.262	-0.298849	0.14124	-2.11589	0.0343539	0.0675765	-0.904734	0.14612	-6.19173	5.95069e-10	7.00645e-09	962.167	806.179	920.228	415.908	466.608	520.175	827.462	575.422	754.213
MSMEG_0601	704.029	0.375262	0.0810381	4.63069	3.64452e-06	1.61351e-05	0.634041	0.084779	7.47876	7.50288e-14	1.44557e-12	560.043	523.038	561.439	848.081	849.106	864.14	705.352	687.018	738.044
MSMEG_0602	704.315	0.070182	0.165875	0.423101	0.672222	0.757027	0.342455	0.167511	2.04437	0.0409168	0.094291	687.03	633.206	576.942	769.081	899.171	766.871	587.923	879.988	538.627
MSMEG_0603	222.258	-0.36643	0.135216	-2.70995	0.00672931	0.0161592	-0.590303	0.146972	-4.01642	5.90891e-05	0.000308597	291.418	234.749	296.776	171.94	212.276	157.885	202.476	229.006	203.796
MSMEG_0604	19.1847	-0.245198	0.280209	-0.875057	0.381543	0.494523	-1.07881	0.325558	-3.31373	0.000920609	0.00362131	30.9326	28.8289	19.9327	5.80877	12.0156	12.6872	23.7978	17.437	21.2217
MSMEG_0605	33.8168	0.0941053	0.259219	0.363033	0.71658	0.794856	-0.610868	0.289792	-2.10795	0.0350352	0.0832181	45.5849	22.6513	46.5097	27.8821	22.0287	16.9163	40.5733	46.4987	35.7064
MSMEG_0606	12.9239	-0.513772	0.322249	-1.59433	0.110862	0.182	-0.412752	0.346375	-1.19163	0.233405	0.369868	19.5364	11.3256	18.8254	11.6175	12.0156	9.86783	8.58282	15.1121	9.43188
MSMEG_0607	142.879	0.449087	0.157645	2.84874	0.00438934	0.0110015	0.473159	0.167752	2.82059	0.00479357	0.0152669	122.102	103.99	115.167	138.249	164.214	179.031	172.437	129.034	161.689
MSMEG_0608	238.773	-0.22283	0.147366	-1.51208	0.130512	0.20868	-0.602645	0.158097	-3.81187	0.000137921	0.000669234	291.418	259.46	305.635	189.366	184.24	179.031	216.131	305.729	217.944
MSMEG_0609	60.3784	0.608043	0.212206	2.86534	0.00416557	0.0104898	0.076428	0.23368	0.327062	0.743621	0.835001	52.097	40.1545	59.7982	59.2495	42.0548	56.3876	89.3393	60.4483	83.8763
MSMEG_0610	9.54522	0.259039	0.352831	0.734172	0.462844	0.573211	5.76772e-05	0.373133	0.000154576	0.999877	0.999877	9.7682	5.14801	11.0737	5.80877	16.0209	5.63876	10.5335	10.4622	11.453
MSMEG_0611	16.9399	0.539231	0.290408	1.85681	0.0633386	0.114291	-0.0877668	0.326221	-0.26904	0.787899	0.867957	13.0243	16.4736	14.3959	11.6175	14.0183	15.5066	23.4077	19.762	24.2534
MSMEG_0612	58.5375	0.197329	0.197365	0.999814	0.317401	0.426883	0.0606202	0.217855	0.27826	0.780813	0.862465	58.6092	63.8354	43.1876	53.4407	58.0756	62.0263	67.4922	53.4735	66.6968
MSMEG_0613	31.1503	0.859275	0.256681	3.34764	0.000815023	0.00239584	0.16144	0.286519	0.563454	0.573126	0.705799	22.7925	23.6809	21.0401	15.1028	34.0443	31.0132	40.1832	45.3362	47.1594
MSMEG_0614	200.846	-0.132554	0.133756	-0.991019	0.321676	0.431661	-0.587281	0.148297	-3.96017	7.48972e-05	0.000384133	211.644	222.394	271.307	146.381	158.206	160.705	220.422	187.157	229.397
MSMEG_0615	162.018	0.174469	0.143858	1.21279	0.225211	0.324766	-0.299506	0.159231	-1.88096	0.0599777	0.128776	156.291	171.944	170.536	127.793	114.149	157.885	194.674	160.421	204.47
MSMEG_0616	79.672	0.822987	0.205709	4.00074	6.3146e-05	0.000228452	0.09474	0.224878	0.421295	0.673539	0.784709	56.9811	67.9538	59.7982	76.6758	50.0652	69.0748	133.034	82.5352	120.93
MSMEG_0617	411.057	0.355978	0.105817	3.36409	0.000767979	0.00227485	-0.0978674	0.114396	-0.855516	0.392266	0.540517	426.545	359.331	370.97	383.379	312.407	369.339	509.897	483.587	484.057
MSMEG_0618	23.6044	0.646465	0.27378	2.36126	0.018213	0.0389643	0.00609286	0.305343	0.0199541	0.98408	0.992118	17.9084	25.7401	14.3959	24.3968	16.0209	16.9163	36.672	29.0617	31.3273
MSMEG_0619	181.395	0.256034	0.164783	1.55377	0.120239	0.194814	-0.155651	0.175756	-0.885611	0.375827	0.523228	201.876	180.18	149.495	146.381	150.196	174.802	251.242	170.883	207.501
MSMEG_0620	80.1061	0.156308	0.222195	0.70347	0.481763	0.592287	-0.0810628	0.235951	-0.343558	0.731179	0.826681	94.4259	76.1906	63.1203	66.22	102.133	53.5682	73.3441	110.434	81.5183
MSMEG_0621	124.115	0.121409	0.165062	0.735535	0.462013	0.572398	-0.376462	0.182382	-2.06414	0.0390049	0.0909054	166.059	117.375	111.845	99.9109	84.1095	108.546	140.056	158.096	131.036
MSMEG_0622	358.515	0.0323726	0.121823	0.265734	0.790444	0.85325	-0.189245	0.129341	-1.46315	0.143427	0.255647	413.52	379.923	325.568	361.306	282.368	322.819	400.271	382.452	358.411
MSMEG_0624	483.337	0.305826	0.1144	2.6733	0.00751085	0.017821	0.125147	0.119895	1.0438	0.296577	0.43915	389.1	425.226	490.567	504.201	414.54	504.669	545.009	511.486	565.239
MSMEG_0625	337.654	1.86503	0.147803	12.6183	1.67388e-36	1.03749e-34	0.904691	0.155809	5.80642	6.38211e-09	6.36274e-08	140.011	158.559	151.71	304.38	244.318	317.18	668.68	495.211	558.839
MSMEG_0626	176.876	0.343644	0.168201	2.04305	0.0410475	0.0788544	0.146622	0.177266	0.827133	0.408162	0.556194	141.639	172.973	156.14	196.336	124.162	198.766	208.328	170.883	222.66
MSMEG_0627	408.115	0.910346	0.121714	7.47936	7.46862e-14	8.63888e-13	0.914482	0.1264	7.2348	4.66206e-13	8.27831e-12	210.016	279.022	267.985	494.907	486.634	483.524	505.606	428.951	516.395
MSMEG_0628	946.468	0.653153	0.0906887	7.20214	5.92728e-13	6.21088e-12	0.709813	0.0935229	7.58973	3.20579e-14	6.54101e-13	646.329	675.419	687.679	1136.2	1063.38	1110.84	987.414	1171.77	1039.19
MSMEG_0629	167.713	-0.0800855	0.124218	-0.644718	0.51911	0.625675	-0.0994541	0.137572	-0.722924	0.469727	0.616452	162.803	183.269	179.395	170.778	148.193	169.163	164.244	158.096	173.479
MSMEG_0630	34.0474	-0.0747868	0.246622	-0.303244	0.761704	0.831295	0.331824	0.262003	1.26649	0.205339	0.336679	29.3046	33.9769	31.0065	51.1172	26.0339	42.2907	26.5287	37.199	28.9693
MSMEG_0631	208.309	-0.0297489	0.13028	-0.228345	0.819378	0.873631	-0.1678	0.141497	-1.18589	0.235666	0.372731	253.973	197.684	205.972	204.469	178.232	191.718	216.521	230.169	196.048
MSMEG_0632	72.2056	0.0705683	0.206554	0.341646	0.732617	0.807081	0.0742402	0.220717	0.336359	0.7366	0.830381	74.8895	75.161	62.0129	83.6463	66.0861	71.8942	77.2454	49.9861	88.9291
MSMEG_0633	474.879	-0.688505	0.0880261	-7.8216	5.2156e-15	6.62795e-14	-0.412831	0.0943986	-4.37327	1.22399e-05	7.28407e-05	607.256	586.874	614.593	456.569	466.608	431.365	362.039	359.203	389.402
MSMEG_0634	38.1901	-0.384699	0.226838	-1.69592	0.0899013	0.153217	0.0107946	0.244698	0.044114	0.964814	0.980332	37.4447	44.2729	40.9728	31.3674	48.0626	47.9294	31.9905	33.7116	27.9588
MSMEG_0635	162.606	0.192118	0.130132	1.47633	0.139854	0.220716	0.189271	0.142325	1.32985	0.183569	0.308545	143.267	149.292	151.71	159.16	170.222	181.85	162.293	162.745	182.911
MSMEG_0636	3309.41	-0.0251344	0.0982966	-0.2557	0.798183	0.858275	-0.0826017	0.0992424	-0.832322	0.405227	0.553826	3366.77	3364.74	3441.72	3249.43	3290.29	3060.44	2986.82	3831.49	3193.03
MSMEG_0637	9794.03	-0.0581099	0.113711	-0.511031	0.60933	0.705675	-0.184167	0.114002	-1.61548	0.106207	0.203613	10080.8	10128.2	10850.1	9008.24	9568.46	8687.92	8628.85	11780.4	9413.35
MSMEG_0638	1953.05	-0.156501	0.118558	-1.32004	0.186822	0.27915	0.168581	0.119456	1.41124	0.158175	0.27536	1857.59	1966.54	1996.6	2307.24	2066.69	2185.02	1988.87	1420.54	1788.35
MSMEG_0639	5102.29	-0.369899	0.072849	-5.07761	3.82209e-07	1.94058e-06	-0.654413	0.0739863	-8.84505	9.14899e-19	2.99049e-17	6466.55	6432.96	6192.44	4140.49	3905.09	4027.48	4625.36	5318.29	4811.94
MSMEG_0640	4762.97	-0.48532	0.0784523	-6.18618	6.16414e-10	4.47002e-09	-0.688891	0.0795377	-8.66119	4.6686e-18	1.407e-16	6339.56	6149.82	5911.16	3827.98	3818.97	3708.89	3994.91	4728.92	4386.5
MSMEG_0641	5355.17	-0.29855	0.128427	-2.32468	0.0200893	0.0423577	-0.749993	0.129072	-5.81063	6.22367e-09	6.21422e-08	6871.93	6924.08	6330.86	4027.8	3706.83	4052.86	4506.76	6620.25	5155.19
MSMEG_0642	5472.11	-0.499071	0.113593	-4.39352	1.11529e-05	4.59691e-05	-0.895877	0.114336	-7.8355	4.66964e-15	1.03999e-13	7821.07	7189.72	7047.33	4047.55	3830.99	3810.39	4438.1	6085.52	4978.35
MSMEG_0643	20863.8	-0.573618	0.155394	-3.69137	0.000223048	0.000734548	-0.844118	0.155515	-5.42787	5.70298e-08	5.04968e-07	30660.7	27470.8	27057.6	15752.2	15530.2	15004.7	15133.5	24738.5	16426.3
MSMEG_0644	470.053	-0.324405	0.143527	-2.26023	0.0238069	0.0489857	-0.559117	0.148779	-3.75803	0.000171258	0.000815339	579.58	540.541	595.767	374.085	350.456	420.088	374.133	562.634	433.193
MSMEG_0645	2280.67	-0.571794	0.0855258	-6.68563	2.29936e-11	2.02504e-10	-0.480005	0.0871255	-5.50935	3.60166e-08	3.28195e-07	2852.31	2860.24	2890.25	2015.64	2082.71	2046.87	1791.47	2162.19	1824.39
MSMEG_0646	39.745	0.322414	0.232457	1.38699	0.165446	0.253198	0.696217	0.246909	2.81973	0.00480642	0.0152921	17.9084	39.1249	29.8991	52.2789	52.0678	50.7488	39.4029	37.199	39.0749
MSMEG_0648	4.03188	-0.355741	0.392212	-0.907013	0.3644	0.477152	0.289613	0.392159	0.738507	0.460206	0.607628	4.8841	3.08881	3.32212	4.64702	10.013	2.81938	2.34077	3.4874	1.68426
MSMEG_0649	94.8622	-0.0892378	0.197048	-0.452873	0.65064	0.739568	1.09016	0.199072	5.4762	4.34545e-08	3.93245e-07	70.0054	56.6282	76.4088	154.513	180.235	122.643	53.0574	73.2355	67.0337
MSMEG_0650	23.0283	0.690805	0.26788	2.57879	0.00991476	0.0228081	0.126602	0.300596	0.421169	0.673631	0.784709	19.5364	20.5921	14.3959	22.0733	14.0183	22.555	32.3806	31.3866	30.3167
MSMEG_0651	22.1012	-0.714099	0.282142	-2.53099	0.011374	0.0258571	0.195464	0.292337	0.668624	0.503736	0.646648	21.1644	21.6217	31.0065	32.5291	24.0313	29.6035	15.9953	8.13727	14.8215
MSMEG_0652	101.858	2.01359	0.182414	11.0386	2.48952e-28	8.74659e-27	1.52544	0.196452	7.76499	8.16543e-15	1.7647e-13	35.8167	37.0657	34.3286	111.528	102.133	122.643	170.096	146.471	156.636
MSMEG_0653	17.8021	1.39025	0.327573	4.24407	2.195e-05	8.65096e-05	1.16478	0.344111	3.38489	0.000712057	0.00289955	8.14016	4.11841	8.85899	19.7498	22.0287	23.9647	26.9188	15.1121	31.3273
MSMEG_0654	3.6877	0.455297	0.386077	1.17929	0.238282	0.340256	0.624359	0.380588	1.64051	0.100899	0.195317	0	0	4.4295	1.16175	6.00782	9.86783	4.68154	2.32494	4.71594
MSMEG_0655	21.5461	0.390083	0.278726	1.39952	0.161656	0.248789	0.472815	0.300692	1.57243	0.115852	0.217533	19.5364	17.5032	13.2885	22.0733	24.0313	28.1938	20.2867	24.4118	24.5902
MSMEG_0656	68.2243	-0.301438	0.214265	-1.40685	0.159471	0.24583	0.0458836	0.225582	0.203401	0.838822	0.9005	70.0054	78.2498	67.5498	97.5874	72.0939	52.1585	49.5463	70.9105	55.9175
MSMEG_0657	23.0538	-0.551026	0.273405	-2.01542	0.0438608	0.0833329	0.203543	0.286575	0.710262	0.477542	0.623252	19.5364	22.6513	31.0065	34.8526	28.0365	23.9647	17.1656	15.1121	15.1584
MSMEG_0658	5.5478	0.661798	0.385552	1.7165	0.0860715	0.14757	0.565172	0.392275	1.44076	0.149654	0.264379	3.25607	1.0296	4.4295	5.80877	8.01043	5.63876	6.24205	10.4622	5.05279
MSMEG_0659	2.35062	0.932422	0.381418	2.44462	0.0145005	0.0319157	0.524234	0.366907	1.42879	0.153063	0.269028	0	0	1.10737	2.32351	4.00522	1.40969	4.29141	4.64987	3.36853
MSMEG_0660	13.1352	0.189872	0.345139	0.550132	0.582229	0.682467	0.573633	0.356413	1.60946	0.107515	0.205401	8.14016	15.444	6.64424	23.2351	14.0183	15.5066	15.6051	5.81234	13.811
MSMEG_0661	37.5238	0.168679	0.232181	0.726498	0.467534	0.57742	0.335459	0.251154	1.33567	0.181657	0.306416	32.5607	27.7993	37.6507	47.6319	44.0574	35.2422	40.5733	39.5239	32.6747
MSMEG_0662	44.897	0.227412	0.218497	1.0408	0.297968	0.406319	0.160503	0.239391	0.670466	0.502561	0.645749	40.7008	38.0953	44.295	47.6319	34.0443	54.9779	56.1784	43.0113	45.1383
MSMEG_0663	64.9126	0.0329727	0.175615	0.187756	0.851068	0.896364	-0.30449	0.202116	-1.50651	0.131936	0.24045	71.6334	70.013	65.3351	53.4407	60.0782	52.1585	75.2947	70.9105	65.3494
MSMEG_0664	21.6183	-0.312724	0.280069	-1.1166	0.264167	0.369805	-0.346421	0.306094	-1.13175	0.257741	0.397723	34.1887	28.8289	15.5032	20.9116	14.0183	21.1453	19.5064	20.9244	19.5375
MSMEG_0665	34.0043	0.070704	0.23543	0.300319	0.763934	0.833175	0.00905401	0.259811	0.0348485	0.972201	0.98464	24.4205	38.0953	35.436	36.0144	28.0365	35.2422	32.7708	43.0113	33.0116
MSMEG_0666	27.7426	0.248839	0.266158	0.93493	0.349825	0.461516	-0.110615	0.292318	-0.378407	0.705128	0.808091	24.4205	31.9177	24.3622	24.3968	26.0339	23.9647	39.7931	19.762	35.0327
MSMEG_0667	19.8745	0.199412	0.276192	0.722004	0.470292	0.580139	-0.380829	0.313713	-1.21394	0.224771	0.360137	19.5364	23.6809	17.718	15.1028	18.0235	11.2775	22.2373	29.0617	22.2323
MSMEG_0668	138.271	-0.409663	0.150024	-2.73066	0.00632084	0.0152508	-0.217777	0.161601	-1.34762	0.177781	0.301036	148.151	176.062	151.71	146.381	154.201	109.956	124.451	124.384	109.14
MSMEG_0669	6535.74	0.245034	0.142387	1.72091	0.0852673	0.146651	0.320686	0.142642	2.24818	0.0245646	0.061646	6026.98	5566.03	5448.28	7042.55	7716.05	6693.21	5641.25	8580.17	6107.14
MSMEG_0670	1817.11	-0.00118873	0.106182	-0.0111952	0.991068	0.993639	-0.0237443	0.107694	-0.220478	0.825499	0.892733	1673.62	1859.46	1952.3	1825.12	1724.25	1846.69	1968.59	1564.68	1939.26
MSMEG_0671	24013.7	-0.00342999	0.131121	-0.026159	0.979131	0.984827	0.105042	0.1312	0.800625	0.423349	0.571482	24742.8	22542.1	22985.8	24614.1	26995.2	24132.5	20171.2	28972.2	20967.7
MSMEG_0672	13699.8	0.189499	0.134815	1.40562	0.159836	0.246219	-0.000702974	0.134984	-0.00520783	0.995845	0.998581	12894	12405.7	13905.3	13083.7	13257.3	12845.1	12837.6	18837.8	13231.9
MSMEG_0673	846.995	-0.0161399	0.162863	-0.0991014	0.921058	0.947559	0.227697	0.164323	1.38567	0.165847	0.285345	846.577	761.906	801.739	1029.31	927.208	883.875	1028.77	602.158	741.413
MSMEG_0674	1448.37	0.0260349	0.0934999	0.278449	0.780668	0.846088	0.166664	0.0953674	1.7476	0.0805337	0.163759	1431.04	1339.51	1373.14	1554.43	1686.2	1422.38	1385.34	1535.62	1307.66
MSMEG_0675	30.7131	0.437087	0.261629	1.67063	0.0947942	0.160165	0.944715	0.274387	3.44301	0.000575284	0.00241664	26.0485	15.444	19.9327	40.6614	34.0443	52.1585	28.4793	33.7116	25.9377
MSMEG_0676	40.8648	0.229515	0.220762	1.03965	0.298502	0.406795	0.277437	0.241756	1.14759	0.251137	0.390341	39.0728	38.0953	29.8991	36.0144	52.0678	46.5198	40.9634	40.6864	44.4646
MSMEG_0677	63.1275	0.375352	0.252728	1.4852	0.137491	0.217824	1.12288	0.257518	4.36037	1.29841e-05	7.66448e-05	58.6092	37.0657	24.3622	89.4551	108.141	87.4008	51.1068	70.9105	41.096
MSMEG_0679	2757.74	0.595826	0.0887684	6.71215	1.91778e-11	1.70038e-10	0.49115	0.0899342	5.46121	4.729e-08	4.26194e-07	2290.64	1951.1	2078.54	2864.89	2993.9	3056.21	3463.56	3017.77	3103.09
MSMEG_0680	358.852	0.778331	0.106842	7.28488	3.21958e-13	3.5079e-12	0.503092	0.114751	4.38419	1.1642e-05	6.96612e-05	281.65	258.43	236.978	374.085	390.509	342.555	447.867	470.799	426.792
MSMEG_0681	395.584	0.494201	0.109948	4.49487	6.9611e-06	2.94112e-05	0.174789	0.117446	1.48825	0.136684	0.246843	332.119	327.414	347.715	397.32	350.456	387.665	498.974	415.001	503.595
MSMEG_0682	342.038	-0.202704	0.105196	-1.92692	0.0539896	0.0995542	-0.253908	0.113741	-2.23233	0.025593	0.0637157	354.911	379.923	403.084	290.439	320.417	345.374	343.703	310.379	330.116
MSMEG_0683	88.3198	0.0681671	0.198473	0.343458	0.731254	0.806503	-0.375453	0.215986	-1.73833	0.0821536	0.166343	89.5418	114.286	81.9457	70.867	60.0782	83.1717	110.406	72.073	112.509
MSMEG_0684	12705	0.294697	0.0595917	4.94527	7.60381e-07	3.70326e-06	0.262058	0.059978	4.36923	1.24683e-05	7.40039e-05	10961.5	10799.5	11592	13777.2	13155.1	13103.1	14105.5	13339.3	13511.5
MSMEG_0685	2797.63	0.371139	0.0939406	3.95079	7.7895e-05	0.000277382	0.309192	0.095024	3.25383	0.00113862	0.00438237	2134.35	2313.52	2658.81	3004.3	2731.56	3099.91	3071.87	3082.86	3081.53
MSMEG_0686	1962.67	0.406307	0.116078	3.50028	0.000464767	0.00144991	0.301748	0.117328	2.57184	0.0101159	0.0290225	1463.6	1639.13	1834.92	2044.69	1958.55	2117.35	2036.08	2541.15	2028.53
MSMEG_0687	894.96	1.79348	0.13488	13.2968	2.4151e-40	1.80309e-38	1.67866	0.136789	12.2719	1.28178e-34	1.47742e-32	320.722	365.509	328.89	1236.11	973.268	1168.63	1347.5	1019.48	1294.52
MSMEG_0688	2880.15	1.40278	0.101656	13.7992	2.57702e-43	2.25747e-41	1.77569	0.1022	17.3746	1.28497e-67	6.0302e-65	1191.72	1188.16	1222.54	4250.86	4295.59	4062.73	2897.48	3730.36	3081.87
MSMEG_0689	25.619	0.856288	0.280042	3.05771	0.00223033	0.00601036	1.16631	0.294836	3.95581	7.6276e-05	0.0003909	11.3962	10.296	17.718	36.0144	42.0548	29.6035	24.9682	30.2242	28.2956
MSMEG_0690	6167.64	0.291192	0.0926154	3.1441	0.00166599	0.00459899	-0.901839	0.0938353	-9.61086	7.19435e-22	2.97276e-20	7125.9	6174.53	6840.25	3638.61	3234.21	3794.88	8808.7	7755.98	8135.67
MSMEG_0691	479.324	0.0902612	0.139286	0.648028	0.516967	0.624194	-0.0951792	0.143889	-0.661478	0.508306	0.650988	423.288	488.032	528.217	460.055	412.537	472.246	587.143	411.514	530.88
MSMEG_0692	1833.24	-0.54347	0.0725411	-7.49189	6.78886e-14	7.9083e-13	-0.337162	0.0746358	-4.51744	6.25932e-06	3.95801e-05	2354.14	2177.61	2144.98	1769.35	1684.19	1808.63	1581.19	1512.37	1466.66
MSMEG_0693	110.542	0.94605	0.179666	5.26559	1.39738e-07	7.51294e-07	0.902342	0.190464	4.73759	2.1627e-06	1.49568e-05	84.6577	56.6282	60.9056	111.528	142.185	136.74	137.715	147.633	116.888
MSMEG_0694	3788.98	1.77038	0.14204	12.464	1.17333e-35	6.82194e-34	1.911	0.142381	13.4217	4.5096e-41	7.40701e-39	1527.09	1193.31	1291.2	5339.42	5298.9	5158.05	4107.27	5914.64	4270.96
MSMEG_0695	899.513	0.93701	0.121588	7.70646	1.29358e-14	1.60355e-13	1.04859	0.123535	8.48818	2.0989e-17	5.94388e-16	586.092	520.979	494.996	1175.7	1153.5	1040.35	932.016	1214.78	977.21
MSMEG_0696	1195.96	0.58411	0.0921148	6.34111	2.28116e-10	1.757e-09	0.154023	0.0954417	1.6138	0.106572	0.204133	1045.2	884.429	1046.47	1179.18	1049.37	1075.59	1485.61	1544.92	1452.85
MSMEG_0697	1354.77	0.588115	0.146557	4.01287	5.99847e-05	0.000217734	0.281067	0.148109	1.89771	0.0577345	0.125269	1128.23	999.744	1120.66	1240.75	1283.67	1450.57	1417.34	2097.09	1454.87
MSMEG_0698	493.882	-0.885948	0.0987472	-8.97189	2.9148e-19	5.46576e-18	-0.38646	0.103184	-3.74535	0.000180139	0.000848397	617.024	671.301	640.062	439.143	552.72	490.572	351.115	341.766	341.232
MSMEG_0699	783.413	1.44727	0.149376	9.68874	3.36668e-22	8.04332e-21	1.21663	0.151545	8.0282	9.89144e-16	2.37178e-14	407.008	350.065	376.507	956.124	764.996	995.241	1212.91	846.277	1141.59
MSMEG_0700	940.02	0.191814	0.0928187	2.06655	0.0387769	0.0751296	0.188645	0.0960029	1.965	0.0494148	0.11009	854.717	848.393	874.826	967.741	1003.31	975.505	1056.86	862.551	1016.28
MSMEG_0701	50.698	0.765569	0.225719	3.3917	0.00069461	0.00207247	0.94287	0.239371	3.93895	8.18405e-05	0.000416493	39.0728	20.5921	35.436	68.5435	58.0756	64.8457	49.1561	61.6108	58.9492
MSMEG_0702	2939.83	0.221895	0.0625312	3.54855	0.000387364	0.00122532	-0.29004	0.0648951	-4.46936	7.84527e-06	4.9089e-05	2915.81	2965.26	2981.05	2452.46	2351.06	2430.3	3341.06	3632.71	3388.74
MSMEG_0703	798.984	0.662069	0.088449	7.48532	7.13743e-14	8.27036e-13	0.47508	0.0926548	5.12741	2.93748e-07	2.29207e-06	584.464	612.614	606.841	807.419	829.08	886.695	1001.46	877.663	984.62
MSMEG_0704	431.559	0.37544	0.100677	3.72915	0.00019213	0.000639459	0.658438	0.105372	6.24871	4.13854e-10	4.98903e-09	356.539	322.266	321.138	571.583	520.678	489.162	427.19	451.037	424.434
MSMEG_0705	14.091	0.484764	0.31625	1.53285	0.125313	0.20189	0.360452	0.340128	1.05975	0.289257	0.431031	8.14016	11.3256	12.1811	16.2646	20.0261	9.86783	16.3854	15.1121	17.5163
MSMEG_0706	5.02883	0.46046	0.389161	1.18321	0.236725	0.338399	0.781221	0.392472	1.99052	0.0465342	0.104705	3.25607	1.0296	3.32212	3.48526	10.013	9.86783	5.07166	3.4874	5.7265
MSMEG_0707	6.77948	0.0130026	0.370411	0.0351032	0.971997	0.981458	-0.111117	0.38565	-0.28813	0.773248	0.857051	6.51213	7.20722	6.64424	4.64702	12.0156	2.81938	6.63218	8.13727	6.4002
MSMEG_0708	140.237	0.77543	0.1636	4.73979	2.13943e-06	9.80881e-06	0.854861	0.172436	4.95755	7.13885e-07	5.28774e-06	94.4259	91.6346	89.6973	180.072	150.196	180.44	173.607	125.547	176.511
MSMEG_0712	262.322	-0.74757	0.110512	-6.76462	1.33656e-11	1.20787e-10	-0.206612	0.117309	-1.76126	0.0781938	0.159693	283.278	337.71	335.534	277.659	286.373	269.251	184.531	199.944	186.616
MSMEG_0713	382.426	0.572418	0.116423	4.91672	8.80081e-07	4.2391e-06	0.00172038	0.125091	0.013753	0.989027	0.994476	361.423	331.532	291.239	338.07	308.402	331.277	465.033	551.01	463.846
MSMEG_0714	35.9358	0.934431	0.244938	3.81497	0.000136201	0.000464851	0.360067	0.271232	1.32752	0.184336	0.309582	29.3046	27.7993	17.718	33.6909	22.0287	40.881	47.5956	48.8236	55.5807
MSMEG_0715	4.71133	0.590624	0.388852	1.51889	0.12879	0.206428	0.857556	0.392355	2.18567	0.0288401	0.0706223	1.62803	3.08881	1.10737	8.13228	4.00522	8.45814	4.29141	6.97481	4.71594
MSMEG_0716	14.6356	0.275923	0.32826	0.840564	0.400592	0.511941	0.242125	0.347125	0.697515	0.48548	0.630482	11.3962	16.4736	8.85899	9.29403	12.0156	25.3744	16.3854	17.437	14.4847
MSMEG_0717	704.503	-0.286463	0.117975	-2.42816	0.0151757	0.0332016	-0.459697	0.122183	-3.76236	0.000168315	0.000804242	810.76	884.429	796.202	573.907	626.816	600.528	603.138	806.753	637.999
MSMEG_0718	17.8283	0.283845	0.296181	0.958347	0.337888	0.448741	0.169989	0.32097	0.529608	0.596384	0.725331	16.2803	13.3848	17.718	16.2646	12.0156	25.3744	22.6274	18.5995	18.19
MSMEG_0719	90.9662	0.0844058	0.16931	0.498528	0.618112	0.713206	-0.0951547	0.187176	-0.508369	0.611194	0.735314	99.31	90.605	85.2678	75.514	88.1148	93.0395	111.186	83.6977	91.9608
MSMEG_0720	8.64939	1.1379	0.355334	3.20234	0.00136317	0.00382408	0.231512	0.38103	0.607597	0.543455	0.680743	4.8841	5.14801	4.4295	5.80877	8.01043	5.63876	13.6545	15.1121	15.1584
MSMEG_0721	77.1535	-0.853	0.203356	-4.19462	2.73333e-05	0.000106197	0.143504	0.208233	0.689153	0.490727	0.634785	81.4016	89.5754	93.0194	84.8081	102.133	109.956	55.3982	27.8992	50.191
MSMEG_0722	24.0231	0.621405	0.291766	2.12981	0.0331875	0.0656161	0.698759	0.308743	2.26323	0.0236212	0.059735	16.2803	16.4736	14.3959	30.2056	22.0287	32.4229	20.2867	39.5239	24.5902
MSMEG_0723	21.2048	-0.124246	0.305682	-0.406457	0.684407	0.767629	0.457286	0.317217	1.44155	0.149428	0.264122	24.4205	15.444	16.6106	33.6909	28.0365	19.7357	11.3137	24.4118	17.1795
MSMEG_0724	18.7378	-0.215664	0.312425	-0.690291	0.490011	0.600351	0.669583	0.320538	2.08894	0.0367133	0.0863611	21.1644	13.3848	13.2885	27.8821	32.0417	23.9647	10.9236	8.13727	17.8532
MSMEG_0725	16.0575	-0.41644	0.328621	-1.26723	0.205072	0.301348	0.324881	0.338463	0.959873	0.337119	0.482964	24.4205	8.23682	15.5032	15.1028	24.0313	23.9647	8.19269	13.9496	11.1161
MSMEG_0726	114.976	-0.914894	0.145687	-6.27987	3.38859e-10	2.56487e-09	-1.06042	0.167637	-6.32568	2.52121e-10	3.16114e-09	170.943	163.707	189.361	80.161	88.1148	76.1232	98.7024	76.7229	90.9502
MSMEG_0727	21.8279	-0.309718	0.286669	-1.0804	0.279963	0.386907	-0.418	0.312502	-1.33759	0.181029	0.305592	29.3046	25.7401	23.2549	19.7498	26.0339	9.86783	15.215	26.7368	20.548
MSMEG_0728	168.535	-0.0553018	0.176305	-0.313671	0.753771	0.824967	-0.00790024	0.184325	-0.0428605	0.965813	0.980818	183.968	153.411	172.75	160.322	212.276	138.15	150.199	204.594	141.141
MSMEG_0729	64.2538	0.663864	0.187787	3.5352	0.000407462	0.00128149	0.519959	0.206777	2.51459	0.0119172	0.0332466	45.5849	52.5097	42.0802	66.22	74.0965	69.0748	72.9539	73.2355	82.5289
MSMEG_0730	117.554	0.274982	0.149396	1.84062	0.0656767	0.117927	0.0764434	0.16542	0.462116	0.643998	0.761805	112.334	100.901	112.952	120.822	108.141	112.775	143.567	112.759	133.731
MSMEG_0731	80.688	0.100136	0.174457	0.573987	0.565976	0.667484	0.197181	0.189919	1.03824	0.29916	0.441681	61.8652	75.161	85.2678	77.8375	98.1278	87.4008	88.1689	75.5604	76.8024
MSMEG_0732	950.558	0.666332	0.103338	6.44809	1.13266e-10	9.10845e-10	0.472672	0.106348	4.44458	8.80644e-06	5.42761e-05	792.852	666.153	688.787	951.477	993.294	1045.99	1240.22	1029.95	1146.31
MSMEG_0734	35.0768	-0.774839	0.22156	-3.4972	0.000470176	0.0014647	-0.827477	0.25393	-3.25869	0.00111929	0.00431812	58.6092	45.3025	47.6171	25.5586	28.0365	25.3744	25.3583	32.5491	27.2851
MSMEG_0735	35.0609	-0.487147	0.239078	-2.03761	0.041589	0.079778	-0.215798	0.258561	-0.83461	0.403937	0.552544	35.8167	50.4505	38.7581	31.3674	28.0365	46.5198	32.3806	23.2494	28.9693
MSMEG_0736	2756.93	-0.56893	0.0966824	-5.88452	3.99212e-09	2.62808e-08	-0.374597	0.0977198	-3.83338	0.000126395	0.000619251	3239.78	3559.34	3378.6	2481.51	2763.6	2582.55	2411.38	1979.68	2415.91
MSMEG_0737	1301.07	-0.338849	0.0790267	-4.28778	1.80467e-05	7.19894e-05	0.166871	0.0808393	2.06423	0.0389958	0.0909054	1305.68	1345.69	1363.18	1454.52	1656.16	1418.15	1068.95	1039.25	1058.05
MSMEG_0738	568.551	0.4384	0.0944264	4.64277	3.43766e-06	1.53122e-05	0.465776	0.0992162	4.69456	2.67188e-06	1.81533e-05	452.593	455.084	454.023	637.803	608.793	641.409	591.044	684.694	591.513
MSMEG_0739	276.54	0.540695	0.11802	4.58138	4.61927e-06	2.01652e-05	0.656699	0.124916	5.25711	1.46337e-07	1.2124e-06	203.504	182.24	228.119	350.85	304.396	318.59	291.036	302.242	307.883
MSMEG_0740	1073.73	0.147056	0.0966575	1.52141	0.128156	0.205814	0.522063	0.0985015	5.30005	1.15769e-07	9.75133e-07	810.76	983.271	920.228	1368.55	1365.78	1199.65	1001.07	968.336	1045.93
MSMEG_0741	677.529	0.602583	0.106585	5.65354	1.57179e-08	9.50013e-08	0.304085	0.111027	2.73883	0.00616576	0.0189738	483.526	552.897	580.264	697.053	582.759	723.171	858.672	782.341	837.079
MSMEG_0742	52.0557	0.891855	0.210429	4.23827	2.25244e-05	8.86672e-05	0.548586	0.231894	2.36568	0.0179971	0.0476778	35.8167	33.9769	35.436	48.7937	58.0756	54.9779	77.2454	55.7985	68.3811
MSMEG_0743	168.614	0.141679	0.205679	0.688836	0.490927	0.600967	0.0993832	0.212086	0.468599	0.639357	0.758191	149.779	160.618	168.321	180.072	142.185	191.718	213.79	109.272	201.775
MSMEG_0744	26.9334	-0.215557	0.256294	-0.841051	0.400319	0.511692	-0.0803834	0.279189	-0.287918	0.77341	0.857051	19.5364	37.0657	28.7917	27.8821	24.0313	29.6035	25.3583	27.8992	22.2323
MSMEG_0745	8.80143	0.043748	0.35985	0.121573	0.903237	0.934531	0.219674	0.374648	0.586347	0.557643	0.693097	9.7682	6.17762	7.75162	6.97053	10.013	12.6872	5.46179	11.6247	8.75817
MSMEG_0746	79.8569	0.392206	0.181258	2.16379	0.0304802	0.0608942	0.439836	0.195944	2.24471	0.0247869	0.0621091	74.8895	56.6282	63.1203	85.9698	108.141	76.1232	93.2406	76.7229	83.8763
MSMEG_0747	10.6198	0.406373	0.339925	1.19548	0.231901	0.332806	0.335003	0.36071	0.92873	0.353029	0.49901	4.8841	8.23682	11.0737	9.29403	12.0156	14.0969	11.7038	10.4622	13.811
MSMEG_0748	11.8938	0.602031	0.328589	1.83217	0.066926	0.119557	-0.00612153	0.358164	-0.0170914	0.986364	0.993014	13.0243	9.26642	7.75162	10.4558	8.01043	9.86783	19.8965	13.9496	14.8215
MSMEG_0749	9.62656	1.03457	0.34699	2.98155	0.00286795	0.00750694	0.110595	0.375727	0.29435	0.76849	0.85359	6.51213	6.17762	5.53687	8.13228	8.01043	4.22907	14.4347	17.437	16.1689
MSMEG_0750	546.256	-1.20768	0.082047	-14.7194	4.83786e-49	5.99712e-47	-0.866079	0.0886449	-9.77021	1.51142e-22	6.57617e-21	843.321	841.185	808.383	467.025	458.597	431.365	363.989	348.74	353.695
MSMEG_0751	6.89464	-0.0842336	0.385241	-0.218652	0.826922	0.879675	-0.395344	0.39156	-1.00966	0.312656	0.455405	4.8841	14.4144	5.53687	2.32351	8.01043	5.63876	7.80256	2.32494	11.1161
MSMEG_0753	510.726	-0.0211707	0.118036	-0.179358	0.857657	0.900924	0.192662	0.121841	1.58127	0.113817	0.214448	535.623	434.492	497.211	543.701	564.736	569.515	431.872	552.172	467.215
MSMEG_0754	404.065	0.406383	0.153312	2.65069	0.00803267	0.0189224	0.0363571	0.158526	0.229344	0.818601	0.888367	328.863	383.012	370.97	404.29	306.399	397.532	549.3	377.802	518.416
MSMEG_0755	86.0636	0.42641	0.20923	2.038	0.0415502	0.0797466	0.224343	0.222144	1.0099	0.312542	0.455401	65.1213	71.0426	81.9457	90.6168	48.0626	115.595	105.725	101.135	95.3293
MSMEG_0756	167.627	-0.7808	0.124503	-6.27134	3.57952e-10	2.70005e-09	-0.559542	0.137603	-4.06637	4.77521e-05	0.000253828	221.412	225.483	222.582	159.16	158.206	132.511	126.011	140.659	122.614
MSMEG_0757	244.582	-0.282805	0.219242	-1.28992	0.197078	0.291425	-1.414	0.22957	-6.15934	7.30489e-10	8.4051e-09	421.66	280.052	328.89	110.367	120.156	117.004	390.908	188.32	243.881
MSMEG_0758	28.906	0.835747	0.269743	3.0983	0.00194633	0.00529059	0.676844	0.289722	2.33618	0.0194816	0.0509937	21.1644	20.5921	14.3959	34.8526	30.0391	32.4229	45.2549	26.7368	34.6958
MSMEG_0760	439.854	-0.537679	0.134874	-3.98652	6.70481e-05	0.000241903	-1.07217	0.143011	-7.49714	6.52263e-14	1.27541e-12	586.092	658.946	605.734	289.277	274.357	293.215	497.413	335.953	417.697
MSMEG_0761	157.475	-0.185775	0.145158	-1.27981	0.200612	0.296118	0.589446	0.150299	3.92182	8.78842e-05	0.000444153	159.547	132.819	127.348	239.321	184.24	205.815	117.429	132.521	118.235
MSMEG_0762	1427.85	0.156455	0.130436	1.19947	0.230344	0.331006	0.563307	0.131369	4.28796	1.80321e-05	0.000104196	1204.74	1154.18	1193.75	1786.78	1858.42	1666.25	1159.46	1643.73	1183.36
MSMEG_0763	4854.19	0.679145	0.109018	6.22967	4.67433e-10	3.45448e-09	0.30498	0.109666	2.78099	0.0054194	0.0169792	3378.17	3772.46	4175.91	4904.93	4369.69	4780.26	6444.14	5355.49	6506.65
MSMEG_0764	1601.37	0.436471	0.0847901	5.14766	2.63749e-07	1.36229e-06	0.324157	0.0869628	3.72753	0.000193364	0.000906137	1204.74	1365.25	1415.22	1671.76	1630.12	1709.95	1885.49	1692.55	1837.19
MSMEG_0765	78.4667	-0.0444366	0.180238	-0.246544	0.805261	0.863484	0.109583	0.195263	0.561206	0.574657	0.707287	68.3774	83.3978	75.3014	73.1905	102.133	77.5329	66.3218	87.1851	72.7602
MSMEG_0767	742.056	-0.649917	0.123706	-5.25372	1.49059e-07	7.9879e-07	-0.378121	0.126419	-2.99101	0.00278057	0.00957865	895.418	943.116	954.556	691.244	750.978	696.387	641.761	462.662	642.378
MSMEG_0768	1102.24	0.203899	0.0739147	2.75858	0.00580534	0.0141525	0.0915611	0.0777187	1.17811	0.238753	0.375825	976.82	1077.99	1023.21	1081.59	1125.47	1085.46	1194.57	1140.38	1214.69
MSMEG_0770	1205.73	0.162385	0.0969547	1.67485	0.0939639	0.159109	0.202319	0.099252	2.03844	0.041506	0.0954479	1115.2	1162.42	1036.5	1248.89	1411.84	1170.04	1283.91	1140.38	1282.4
MSMEG_0771	71.827	0.96987	0.23246	4.1722	3.01673e-05	0.000116178	0.699619	0.245108	2.85433	0.00431275	0.0139399	42.3288	36.0361	53.154	67.3817	94.1226	69.0748	72.5638	125.547	86.2343
MSMEG_0772	42.0206	1.68396	0.283901	5.93149	3.00197e-09	2.00845e-08	1.36854	0.296959	4.60853	4.0552e-06	2.65629e-05	16.2803	18.5328	9.96637	56.926	42.0548	45.1101	44.8647	87.1851	57.265
MSMEG_0773	105.608	0.559986	0.150871	3.71169	0.00020588	0.000683146	-0.208535	0.175468	-1.18845	0.234657	0.371404	107.45	82.3682	96.3415	84.8081	72.0939	83.1717	143.177	145.308	135.752
MSMEG_0774	211.802	-0.0905369	0.167271	-0.54126	0.588328	0.687901	-0.506559	0.177384	-2.85573	0.00429384	0.0138968	314.21	196.654	220.367	162.646	152.198	183.26	253.193	218.544	205.143
MSMEG_0775	513.772	0.742778	0.10901	6.81387	9.50085e-12	8.73015e-11	0.302128	0.115192	2.62283	0.0087202	0.0255425	374.447	409.782	389.796	486.775	436.569	528.634	605.479	728.867	663.6
MSMEG_0776	55.5013	-0.315867	0.246922	-1.27922	0.20082	0.296359	-0.0201887	0.257721	-0.0783355	0.937561	0.964832	32.5607	78.2498	68.6572	59.2495	48.0626	71.8942	53.4475	37.199	50.191
MSMEG_0777	3187.92	0.118542	0.0759081	1.56165	0.118371	0.192309	-0.0625964	0.0773104	-0.809676	0.418127	0.566824	3210.48	3052.77	3168.2	2999.65	3158.11	2872.95	3520.13	3149.13	3559.86
MSMEG_0778	16.7798	0.417963	0.316442	1.32082	0.186562	0.278887	0.362155	0.335842	1.07835	0.280877	0.4217	13.0243	13.3848	13.2885	18.5881	8.01043	26.7841	23.0176	19.762	15.1584
MSMEG_0779	26.7542	0.529818	0.261083	2.02931	0.042427	0.0811014	0.296155	0.28636	1.03421	0.30104	0.443758	13.0243	24.7105	24.3622	27.8821	20.0261	32.4229	34.3313	33.7116	30.3167
MSMEG_0780	15.4774	-0.0936936	0.319126	-0.293594	0.769068	0.836621	-0.180218	0.340962	-0.528556	0.597113	0.725547	21.1644	16.4736	14.3959	24.3968	8.01043	8.45814	15.6051	13.9496	16.8426
MSMEG_0781	307.587	0.531539	0.154387	3.4429	0.000575514	0.00175052	0.732563	0.158492	4.62207	3.79938e-06	2.50622e-05	229.553	209.009	223.69	390.349	362.472	369.339	280.892	417.326	285.651
MSMEG_0782	443.287	0.597196	0.127333	4.69004	2.73152e-06	1.23595e-05	0.363191	0.132584	2.73932	0.00615673	0.0189638	359.795	335.65	345.501	453.084	420.548	470.836	490.001	638.195	475.973
MSMEG_0785	10.535	-0.0887826	0.339849	-0.261241	0.793907	0.855734	-0.183425	0.362087	-0.506577	0.612451	0.736174	11.3962	12.3552	11.0737	9.29403	10.013	9.86783	8.19269	8.13727	14.4847
MSMEG_0786	421.273	-0.226447	0.123194	-1.83813	0.0660427	0.11839	-0.701012	0.131442	-5.33325	9.64699e-08	8.24197e-07	579.58	537.453	431.876	328.776	308.402	297.445	466.203	396.402	445.319
MSMEG_0787	297.043	-0.321411	0.171769	-1.87118	0.0613203	0.11123	-0.977598	0.180785	-5.40753	6.3899e-08	5.60502e-07	516.086	341.828	317.816	196.336	216.282	159.295	315.614	325.491	284.641
MSMEG_0788	322.559	-0.294516	0.147316	-1.99921	0.0455851	0.0860863	-0.975029	0.157597	-6.18684	6.13824e-10	7.20147e-09	501.434	404.634	355.467	217.248	228.297	176.211	353.456	368.502	297.778
MSMEG_0790	201.325	0.596785	0.240693	2.47945	0.0131586	0.0294054	-0.264184	0.247583	-1.06705	0.285949	0.427557	153.035	172.973	209.294	152.19	112.146	169.163	376.474	158.096	308.557
MSMEG_0794	109.086	0.00111556	0.176834	0.00630851	0.994967	0.996635	-0.438856	0.194103	-2.26095	0.0237624	0.0600226	96.0539	125.612	139.529	95.2638	58.0756	104.317	128.742	113.922	120.256
MSMEG_0795	369.82	-0.360752	0.105463	-3.42065	0.000624718	0.00187844	-0.262395	0.112664	-2.329	0.0198589	0.0517545	392.356	411.841	472.849	357.82	320.417	380.616	334.73	328.978	328.768
MSMEG_0796	172.309	-0.151074	0.131838	-1.14591	0.251833	0.355663	-0.235967	0.144836	-1.6292	0.103272	0.198914	206.76	171.944	192.683	164.969	138.18	171.982	172.437	152.283	179.542
MSMEG_0797	517.435	-0.42606	0.110583	-3.85284	0.000116756	0.000403092	-0.0477653	0.114336	-0.417761	0.676122	0.785938	564.927	569.37	579.157	528.598	618.806	517.356	383.106	481.262	414.329
MSMEG_0798	67.4742	0.317136	0.191041	1.66004	0.0969064	0.162957	0.377974	0.206929	1.82659	0.0677617	0.142371	55.3531	65.8946	47.6171	65.0582	68.0887	91.6298	72.9539	68.5856	72.0865
MSMEG_0799	35.2927	0.442698	0.265061	1.67017	0.0948852	0.160209	0.628332	0.279085	2.2514	0.0243601	0.0612734	13.0243	29.8585	32.1138	39.4996	34.0443	54.9779	37.4523	45.3362	31.3273
MSMEG_0800	16.8807	-0.108025	0.339896	-0.317819	0.750622	0.822626	0.435792	0.348733	1.24965	0.211429	0.344431	6.51213	11.3256	25.4696	22.0733	26.0339	19.7357	8.97295	13.9496	17.8532
MSMEG_0801	2.54512	-0.304885	0.38666	-0.788508	0.4304	0.542333	0.19629	0.378677	0.518356	0.60421	0.730155	3.25607	3.08881	1.10737	2.32351	4.00522	4.22907	1.56051	2.32494	1.01056
MSMEG_0802	0	NA	NA	NA	NA	NA	NA	NA	NA	NA	NA	0	0	0	0	0	0	0	0	0
MSMEG_0803	11.6309	-0.816776	0.329891	-2.4759	0.0132902	0.0296473	-0.18223	0.345792	-0.526991	0.5982	0.72633	16.2803	15.444	13.2885	9.29403	16.0209	14.0969	8.19269	4.64987	7.41076
MSMEG_0804	1.254	-0.189725	0.350348	-0.541533	0.58814	NA	-0.387034	0.321747	-1.20291	0.22901	NA	1.62803	2.05921	2.21475	1.16175	0	0	1.56051	2.32494	0.336853
MSMEG_0805	66.805	-0.509251	0.197125	-2.58339	0.00978348	0.0225614	-0.127728	0.210955	-0.605476	0.544863	0.681987	84.6577	81.3386	63.1203	60.4112	84.1095	66.2554	47.5956	66.2607	47.4962
MSMEG_0806	829.163	-0.445536	0.0826047	-5.39359	6.90621e-08	3.85504e-07	-0.189003	0.0863252	-2.18943	0.0285653	0.0700537	986.588	922.524	957.879	874.801	754.983	866.959	682.334	716.08	700.317
MSMEG_0807	707.787	-0.312912	0.0976416	-3.2047	0.00135203	0.00379934	-0.216855	0.101737	-2.13153	0.0330458	0.0792087	761.919	815.445	815.027	705.185	618.806	724.58	584.412	688.181	656.526
MSMEG_0808	142.472	-0.667021	0.184158	-3.62201	0.000292322	0.000942834	0.0292182	0.189097	0.154514	0.877204	0.928505	148.151	184.299	149.495	159.16	176.23	160.705	75.6848	132.521	96.003
MSMEG_0809	7.40514	0.148043	0.374639	0.395163	0.692723	0.77533	0.371169	0.384338	0.965735	0.334177	0.47969	6.51213	3.08881	8.85899	12.7793	2.00261	11.2775	6.24205	8.13727	7.74761
MSMEG_0810	198.754	0.84771	0.129668	6.53756	6.25302e-11	5.18062e-10	0.274563	0.143249	1.91668	0.0552785	0.120658	140.011	161.648	140.637	178.91	182.237	180.44	288.695	238.306	277.903
MSMEG_0811	24.664	0.796211	0.282752	2.81593	0.00486359	0.012054	1.2268	0.29602	4.14433	3.40803e-05	0.00018631	14.6523	14.4144	9.96637	42.9849	32.0417	32.4229	28.4793	22.0869	24.9271
MSMEG_0812	65.3261	1.26832	0.253809	4.99716	5.81806e-07	2.90747e-06	0.409388	0.26988	1.51692	0.129286	0.23667	32.5607	37.0657	46.5097	59.2495	46.06	56.3876	123.671	60.4483	125.983
MSMEG_0813	55.8086	0.287787	0.209038	1.37672	0.1686	0.256769	0.246591	0.227183	1.08543	0.277732	0.418509	45.5849	51.4801	46.5097	46.4702	74.0965	57.7973	50.7166	63.9357	65.6863
MSMEG_0814	653.893	0.224283	0.164311	1.36499	0.172256	0.261609	-0.477224	0.168305	-2.83548	0.00457569	0.0147148	744.011	637.324	657.78	484.451	466.608	486.343	644.882	1063.66	699.98
MSMEG_0815	217.794	0.320829	0.128157	2.50341	0.0123001	0.0276943	0.162752	0.138415	1.17583	0.239664	0.37665	193.736	213.128	174.965	211.439	206.269	235.418	261.386	216.219	247.587
MSMEG_0816	211.786	0.134584	0.154905	0.86882	0.384946	0.497853	-0.0404065	0.163761	-0.24674	0.805109	0.87852	226.297	185.328	207.079	206.792	202.263	188.898	196.625	285.967	206.828
MSMEG_0817	77.23	0.0674664	0.165927	0.406602	0.6843	0.767629	-0.150945	0.18822	-0.801959	0.422577	0.571032	74.8895	74.1314	85.2678	61.573	76.0991	74.7136	80.3664	87.1851	80.8446
MSMEG_0818	92.7146	0.0206214	0.190116	0.108467	0.913625	0.942458	0.0358102	0.203174	0.176254	0.860094	0.915884	100.938	75.161	96.3415	85.9698	102.133	91.6298	85.0479	119.734	77.4761
MSMEG_0819	117.605	0.210873	0.151925	1.388	0.165136	0.252842	0.459329	0.163029	2.81746	0.00484044	0.0153706	110.706	101.931	87.4826	156.837	130.17	125.462	117.038	111.597	117.225
MSMEG_0820	6.24047	0.396347	0.383913	1.03239	0.301891	0.410477	0.832341	0.38982	2.13519	0.0327452	0.0786315	3.25607	3.08881	3.32212	8.13228	10.013	9.86783	3.12102	9.29974	6.06335
MSMEG_0821	94.8743	0.359383	0.162881	2.20642	0.0273547	0.0554036	0.262623	0.178883	1.46812	0.14207	0.253918	73.2615	86.4866	84.1604	116.175	84.1095	93.0395	107.675	98.8098	110.151
MSMEG_0822	78.4858	0.622994	0.181656	3.42953	0.000604626	0.0018222	0.519567	0.197636	2.62891	0.00856579	0.0251687	68.3774	50.4505	58.6908	97.5874	82.1069	76.1232	94.8011	80.2103	98.0241
MSMEG_0823	206.565	0.328847	0.134379	2.44715	0.014399	0.0317455	0.0190421	0.14578	0.130622	0.896075	0.94105	175.828	191.506	201.542	195.175	188.245	194.537	263.336	197.62	251.292
MSMEG_0824	56.2604	-0.116793	0.204231	-0.571869	0.567411	0.668577	-0.0970922	0.223376	-0.434659	0.66381	0.777857	74.8895	47.3617	58.6908	51.1172	62.0809	53.5682	57.3488	43.0113	58.2755
MSMEG_0827	63.9428	0.233442	0.185468	1.25866	0.208153	0.304784	0.0159138	0.207572	0.0766663	0.938889	0.965477	60.2372	61.7762	56.4761	63.8965	72.0939	46.5198	67.8823	77.8853	68.7179
MSMEG_0828	135.816	-0.13462	0.162797	-0.826918	0.408284	0.520556	0.0829792	0.172423	0.481255	0.630336	0.752007	161.175	129.73	124.026	135.925	150.196	152.246	147.078	108.11	113.856
MSMEG_0830	388.452	-0.590107	0.171556	-3.43973	0.00058229	0.00176541	-0.913606	0.177327	-5.15208	2.57609e-07	2.0367e-06	442.825	572.459	604.626	277.659	238.31	312.951	390.518	259.23	397.486
MSMEG_0831	13.2516	-0.183878	0.313253	-0.586995	0.557207	0.659851	-0.344015	0.341844	-1.00635	0.314247	0.457074	16.2803	15.444	15.5032	16.2646	8.01043	8.45814	15.215	11.6247	12.4635
MSMEG_0833	960.419	-0.86079	0.0753663	-11.4214	3.26852e-30	1.28588e-28	-0.446853	0.0787281	-5.67589	1.37967e-08	1.33105e-07	1222.65	1334.37	1234.72	910.815	895.166	968.457	695.988	687.018	694.59
MSMEG_0834	1239.11	-0.658636	0.137219	-4.79988	1.58757e-06	7.40267e-06	-0.461433	0.138778	-3.32497	0.000884273	0.0034998	1624.78	1548.52	1581.33	1204.74	1181.54	1030.48	873.887	1242.68	864.027
MSMEG_0836	3681.1	-0.878685	0.0776112	-11.3216	1.02546e-29	3.89439e-28	-0.560425	0.0785563	-7.13406	9.74534e-13	1.65018e-11	4950.85	5108.89	4890.16	3340.04	3626.72	3142.2	2760.55	2521.39	2789.14
MSMEG_0837	514.495	-0.638429	0.102096	-6.25321	4.02095e-10	3.01227e-09	-0.341141	0.106894	-3.1914	0.00141583	0.00531543	649.585	616.732	640.062	482.128	490.639	524.405	395.2	461.5	370.201
MSMEG_0838	158.965	0.272847	0.145428	1.87616	0.0606336	0.110075	0.110899	0.157562	0.703841	0.481532	0.627089	131.871	160.618	138.422	173.101	140.183	152.246	159.172	202.269	172.805
MSMEG_0839	48.4985	0.18619	0.250228	0.74408	0.456828	0.567687	0.661817	0.259376	2.55158	0.0107236	0.0304207	24.4205	41.1841	46.5097	53.4407	76.0991	66.2554	51.4969	27.8992	49.1805
MSMEG_0840	698.191	-0.64131	0.114114	-5.61992	1.91045e-08	1.14418e-07	0.100535	0.115802	0.868165	0.385304	0.533473	763.547	814.416	735.296	777.214	907.182	807.752	425.24	552.172	500.9
MSMEG_0841	838.74	-0.907059	0.17965	-5.04903	4.4407e-07	2.24426e-06	0.0121613	0.180187	0.0674927	0.946189	0.969389	1054.97	1023.43	909.154	977.035	1055.37	982.554	394.029	717.243	434.877
MSMEG_0842	423.043	-1.32181	0.143647	-9.20179	3.52052e-20	7.07334e-19	-0.0339195	0.143913	-0.235694	0.81367	0.885068	571.439	557.015	477.278	483.29	620.809	469.427	181.41	245.281	201.438
MSMEG_0843	267.08	-0.50524	0.142767	-3.53891	0.000401776	0.00126482	-0.0529304	0.147756	-0.358229	0.720172	0.817896	315.838	299.614	285.703	267.203	274.357	324.229	184.531	259.23	193.017
MSMEG_0844	319.696	-0.541547	0.178764	-3.0294	0.00245044	0.00654447	0.0971076	0.18111	0.536181	0.591833	0.721802	345.143	381.983	315.602	374.085	420.548	328.458	187.261	317.354	206.828
MSMEG_0845	606.092	-0.790226	0.108202	-7.30323	2.80935e-13	3.07112e-12	0.0633893	0.109981	0.576365	0.564369	0.698187	703.31	735.136	640.062	700.538	734.957	740.087	358.528	456.85	385.359
MSMEG_0846	976.994	-0.374652	0.0809964	-4.62553	3.73638e-06	1.65084e-05	-0.0440005	0.0839188	-0.524322	0.600054	0.728025	1028.92	1140.8	1040.93	1045.58	1015.32	1054.45	804.054	792.803	870.09
MSMEG_0847	513.609	-0.713693	0.132385	-5.39106	7.00434e-08	3.9065e-07	0.0615426	0.134227	0.458497	0.646596	0.763778	582.836	563.193	594.66	582.039	664.866	576.563	303.52	432.438	322.368
MSMEG_0848	1403.97	-0.349951	0.085758	-4.08068	4.4905e-05	0.000167533	0.0214506	0.0875663	0.244965	0.806484	0.87929	1453.83	1548.52	1508.24	1564.88	1497.95	1516.83	1080.65	1299.64	1165.17
MSMEG_0849	56.8283	-0.0562441	0.208428	-0.26985	0.787276	0.851284	-0.060295	0.226655	-0.266021	0.790223	0.868797	55.3531	48.3913	73.0867	55.7642	52.0678	60.6167	65.9316	45.3362	54.907
MSMEG_0850	39.7065	-0.316945	0.263667	-1.20206	0.229339	0.329778	0.13239	0.274826	0.481722	0.630003	0.751884	35.8167	41.1841	46.5097	30.2056	56.073	54.9779	38.6227	18.5995	35.3695
MSMEG_0851	16.0424	-0.0203054	0.293874	-0.0690956	0.944914	0.962792	-0.385847	0.327812	-1.17704	0.239181	0.376208	16.2803	20.5921	16.6106	12.7793	18.0235	8.45814	18.336	15.1121	18.19
MSMEG_0852	7.24087	0.818924	0.374401	2.18729	0.0287213	0.0578745	0.428366	0.387312	1.106	0.268727	0.409537	1.62803	3.08881	7.75162	10.4558	2.00261	8.45814	11.7038	9.29974	10.7793
MSMEG_0853	12.3092	-0.0327426	0.359608	-0.091051	0.927452	0.95179	0.397857	0.368836	1.07868	0.280729	0.421575	19.5364	6.17762	6.64424	16.2646	22.0287	8.45814	7.80256	15.1121	8.75817
MSMEG_0854	103.909	0.0614745	0.163269	0.376523	0.706528	0.786761	0.544847	0.172608	3.15655	0.00159645	0.00590913	86.2857	94.7235	81.9457	134.763	152.198	108.546	86.2183	94.1599	96.3399
MSMEG_0855	21.4598	-0.419973	0.286328	-1.46676	0.142442	0.224101	-0.431255	0.310524	-1.3888	0.164894	0.284196	22.7925	35.0065	23.2549	16.2646	20.0261	21.1453	22.6274	10.4622	21.5586
MSMEG_0856	52.5845	-0.279535	0.194688	-1.43581	0.151057	0.234731	0.188781	0.210131	0.898396	0.368974	0.515999	48.841	50.4505	59.7982	59.2495	62.0809	63.436	41.7437	41.8488	45.812
MSMEG_0857	47.0312	-0.624613	0.216089	-2.89054	0.00384586	0.0097708	-0.28464	0.233918	-1.21683	0.223667	0.358676	55.3531	62.8058	53.154	40.6614	48.0626	50.7488	29.6497	48.8236	34.0221
MSMEG_0858	972.039	0.260597	0.124937	2.08582	0.0369947	0.0721446	0.0720082	0.127474	0.564885	0.572152	0.705128	804.248	932.82	950.127	923.595	931.213	978.325	1225	882.313	1120.71
MSMEG_0859	469.73	-0.387734	0.0882976	-4.39122	1.12716e-05	4.63998e-05	-0.67487	0.0979165	-6.8923	5.48988e-12	8.42722e-11	592.604	598.199	585.801	381.055	380.496	343.964	456.45	423.138	465.867
MSMEG_0860	639.942	0.150869	0.092532	1.63045	0.103006	0.171451	0.0991602	0.0974358	1.0177	0.308821	0.451491	576.324	625.998	609.056	681.95	588.767	666.783	667.119	632.382	711.096
MSMEG_0862	459.767	0.429833	0.114179	3.76455	0.000166848	0.000560713	-0.160805	0.121864	-1.31955	0.186987	0.312914	421.66	413.9	444.057	404.29	332.433	397.532	600.017	502.186	621.83
MSMEG_0863	487.511	-0.0974424	0.0875751	-1.11267	0.265849	0.371383	-0.0196779	0.0940422	-0.209246	0.834257	0.897599	507.946	480.824	512.714	503.04	486.634	487.753	457.23	496.374	455.088
MSMEG_0864	36.7937	0.883333	0.236833	3.72978	0.000191648	0.000638613	0.428106	0.262831	1.62883	0.10335	0.199006	29.3046	21.6217	25.4696	33.6909	36.0469	36.6519	56.5686	47.6612	44.1277
MSMEG_0865	101.45	0.384645	0.19171	2.00639	0.0448152	0.0849742	-0.212225	0.208591	-1.01742	0.308952	0.451491	89.5418	99.8715	100.771	104.558	54.0704	83.1717	134.594	102.297	144.173
MSMEG_0866	3951.99	-0.244359	0.066817	-3.65713	0.000255054	0.000830381	0.0277567	0.0677309	0.409809	0.681946	0.790331	3983.8	4397.43	4036.38	4134.68	4413.75	4128.98	3530.27	3444.39	3498.22
MSMEG_0867	375.208	-0.255204	0.10438	-2.44495	0.0144872	0.0319078	0.224594	0.109134	2.05797	0.0395929	0.0921125	337.003	364.479	418.587	458.893	428.558	428.546	316.394	316.191	308.22
MSMEG_0868	17.3136	0.300873	0.320604	0.938456	0.34801	0.459768	0.370042	0.336905	1.09836	0.272049	0.41231	13.0243	17.5032	12.1811	20.9116	18.0235	21.1453	25.3583	8.13727	19.5375
MSMEG_0869	0.638998	0.198527	0.27895	0.711696	0.476653	NA	0.0163812	0.258167	0.0634521	0.949406	NA	1.62803	0	0	1.16175	0	0	1.95064	0	1.01056
MSMEG_0870	47.366	0.0871187	0.202359	0.430515	0.666821	0.752881	-0.0119995	0.226367	-0.0530093	0.957724	0.975391	55.3531	46.3321	39.8655	48.7937	38.0496	49.3391	49.5463	48.8236	50.191
MSMEG_0871	14.6615	0.267006	0.315185	0.847142	0.396916	0.508232	0.0986066	0.339901	0.290104	0.771737	0.855893	16.2803	9.26642	14.3959	17.4263	8.01043	15.5066	15.9953	20.9244	14.1478
MSMEG_0872	20.9407	-0.499948	0.278585	-1.7946	0.0727177	0.12805	-0.0930086	0.298728	-0.311349	0.755536	0.843691	21.1644	28.8289	21.0401	22.0733	22.0287	22.555	15.215	22.0869	13.4741
MSMEG_0873	1.11403	0.193282	0.326465	0.592047	0.553819	NA	0.135731	0.30597	0.443611	0.657324	NA	0	0	2.21475	2.32351	0	1.40969	2.7309	0	1.34741
MSMEG_0874	30.0886	0.203058	0.260388	0.779831	0.43549	0.546651	-0.387135	0.290491	-1.33269	0.182634	0.307433	32.5607	22.6513	39.8655	23.2351	24.0313	21.1453	44.8647	26.7368	35.7064
MSMEG_0875	78.3185	0.272972	0.176367	1.54775	0.121683	0.19691	0.487059	0.190217	2.56055	0.0104507	0.0298139	68.3774	62.8058	62.0129	101.073	102.133	73.3039	81.1466	77.8853	76.1287
MSMEG_0876	62.7338	-0.403339	0.175283	-2.30108	0.0213873	0.0446502	-0.735822	0.205526	-3.58019	0.000343341	0.00152313	76.5175	78.2498	86.3752	44.1467	48.0626	47.9294	55.7883	68.5856	58.9492
MSMEG_0877	162.153	0.734059	0.180268	4.07204	4.66023e-05	0.000173373	0.404624	0.189542	2.13475	0.0327813	0.0786619	105.822	135.908	117.382	144.058	164.214	180.44	246.561	153.446	211.543
MSMEG_0878	60.7841	0.669323	0.192501	3.47698	0.000507089	0.00156559	0.189042	0.21638	0.873658	0.382305	0.530463	40.7008	53.5393	49.8318	65.0582	52.0678	49.3391	85.438	70.9105	80.1709
MSMEG_0879	44.4845	-0.162944	0.230763	-0.70611	0.48012	0.590488	-0.474692	0.255472	-1.8581	0.0631548	0.134324	55.3531	53.5393	47.6171	38.3379	24.0313	42.2907	34.3313	52.311	52.549
MSMEG_0881	47.3844	0.42806	0.199904	2.14132	0.0322479	0.0639507	-0.305598	0.234946	-1.30072	0.193355	0.321619	43.9569	44.2729	45.4023	29.0439	42.0548	36.6519	58.5192	66.2607	60.2966
MSMEG_0882	62.3277	0.44349	0.185295	2.39342	0.0166921	0.0360747	-0.000369615	0.21047	-0.00175614	0.998599	0.999541	55.3531	52.5097	58.6908	55.7642	50.0652	59.207	85.0479	73.2355	71.0759
MSMEG_0883	106.885	0.707708	0.190872	3.70777	0.000209093	0.000692411	0.186228	0.205518	0.906138	0.364863	0.511228	92.7979	66.9242	94.1268	104.558	102.133	83.1717	160.733	106.947	150.573
MSMEG_0884	32.5797	0.463673	0.27111	1.71028	0.0872147	0.149219	-0.249125	0.297177	-0.838306	0.401859	0.550274	24.4205	25.7401	40.9728	32.5291	22.0287	18.326	53.8377	30.2242	45.1383
MSMEG_0885	63.0778	0.712839	0.18933	3.76507	0.000166505	0.000559847	0.48339	0.209295	2.30961	0.0209095	0.0539574	45.5849	45.3025	47.6171	77.8375	56.073	62.0263	81.5368	73.2355	78.4867
MSMEG_0886	106.16	0.930579	0.165778	5.6134	1.98389e-08	1.18493e-07	0.643652	0.180662	3.56273	0.000367018	0.00162159	65.1213	71.0426	71.9793	120.822	106.138	107.136	151.76	139.496	121.941
MSMEG_0887	158.308	-0.00388936	0.138053	-0.0281729	0.977524	0.983964	-0.382616	0.154101	-2.4829	0.0130319	0.0359595	159.547	186.358	172.75	139.411	98.1278	150.837	172.827	167.395	177.521
MSMEG_0888	45.2922	0.0316937	0.210329	0.150686	0.880223	0.917605	-0.0816956	0.234217	-0.348803	0.727238	0.824069	40.7008	40.1545	56.4761	49.9554	42.0548	36.6519	46.8154	47.6612	47.1594
MSMEG_0889	290.499	-0.807608	0.12443	-6.49046	8.55768e-11	7.00174e-10	-0.5688	0.131924	-4.31156	1.62105e-05	9.4838e-05	413.52	335.65	425.232	257.909	290.378	236.828	223.153	203.432	228.386
MSMEG_0890	53.9157	0.00229776	0.195405	0.011759	0.990618	0.993339	-0.040442	0.217307	-0.186106	0.852362	0.909951	60.2372	54.5689	49.8318	51.1172	40.0522	64.8457	53.0574	56.9609	54.5701
MSMEG_0891	43.9348	0.73399	0.234244	3.13344	0.00172769	0.00475731	0.438288	0.255007	1.71873	0.0856635	0.171745	22.7925	41.1841	27.6844	39.4996	48.0626	46.5198	49.5463	68.5856	51.5385
MSMEG_0892	211.25	0.0755127	0.170121	0.443877	0.657131	0.745013	0.113406	0.176684	0.641861	0.520964	0.661909	153.035	230.631	215.938	178.91	230.3	250.925	185.311	230.169	226.028
MSMEG_0893	9.58019	-0.321534	0.356502	-0.901913	0.367103	0.479306	-0.0210289	0.370977	-0.0566853	0.954796	0.974221	11.3962	9.26642	9.96637	6.97053	16.0209	8.45814	7.80256	11.6247	4.71594
MSMEG_0894	431.184	0.351103	0.159111	2.20665	0.0273382	0.0554036	1.07676	0.1606	6.7046	2.0196e-11	2.87826e-10	268.625	275.934	318.924	626.186	676.882	586.431	300.399	476.612	350.664
MSMEG_0895	445.227	-0.550022	0.112463	-4.89069	1.00481e-06	4.81515e-06	0.0243339	0.115942	0.209881	0.833761	0.897599	490.038	504.505	487.245	512.334	492.642	501.85	312.493	398.726	307.21
MSMEG_0896	438.785	-0.576418	0.117053	-4.92443	8.46077e-07	4.09332e-06	0.22581	0.119426	1.89079	0.0586525	0.126884	462.361	467.44	456.238	534.407	566.738	528.634	267.238	363.852	302.157
MSMEG_0897	264.429	-0.221066	0.112949	-1.95722	0.0503221	0.0936855	0.419698	0.118031	3.55584	0.000376771	0.00166022	257.229	222.394	265.77	329.938	332.433	338.326	205.207	206.919	221.649
MSMEG_0898	97.1587	0.0709726	0.193428	0.366919	0.713679	0.792441	0.332141	0.202875	1.63717	0.101594	0.196286	61.8652	86.4866	111.845	98.7491	104.136	135.33	97.1419	82.5352	96.3399
MSMEG_0899	1537	0.213139	0.0680485	3.13217	0.0017352	0.00477199	0.0557257	0.0711527	0.783184	0.433519	0.581269	1505.93	1392.02	1425.19	1475.43	1554.02	1464.67	1656.09	1718.13	1641.48
MSMEG_0900	299.011	-0.113833	0.162132	-0.702102	0.482616	0.593224	0.435257	0.165139	2.6357	0.00839635	0.0247483	312.582	250.193	252.481	340.394	440.574	338.326	228.225	310.379	217.944
MSMEG_0901	183.923	0.606546	0.160342	3.78282	0.00015506	0.000524045	0.105349	0.171557	0.614075	0.539165	0.67679	166.059	144.144	148.388	149.866	186.243	160.705	277.771	185.995	236.134
MSMEG_0902	156.086	1.57696	0.15501	10.1733	2.60953e-24	6.91316e-23	1.25241	0.165823	7.55267	4.26424e-14	8.67369e-13	73.2615	65.8946	71.9793	149.866	186.243	193.127	216.911	238.306	209.186
MSMEG_0904	259.813	-0.052286	0.129018	-0.40526	0.685286	0.768447	-0.270751	0.138776	-1.95099	0.0510576	0.113136	296.302	288.289	258.018	211.439	238.31	245.286	298.448	226.681	275.545
MSMEG_0906	254.234	-0.496378	0.106721	-4.65117	3.30058e-06	1.47215e-05	-0.377872	0.117231	-3.2233	0.00126722	0.00482365	309.326	300.644	316.709	252.101	226.295	226.96	206.768	229.006	220.302
MSMEG_0907	8.68196	0.499701	0.359401	1.39037	0.164417	0.251999	0.700267	0.373894	1.8729	0.0610818	0.130932	6.51213	5.14801	4.4295	8.13228	12.0156	14.0969	8.58282	10.4622	8.75817
MSMEG_0908	15.456	0.401818	0.31486	1.27618	0.201892	0.297672	0.644268	0.332808	1.93586	0.0528851	0.116593	8.14016	11.3256	12.1811	20.9116	22.0287	15.5066	13.2644	20.9244	14.8215
MSMEG_0909	942.566	0.282048	0.125968	2.23904	0.0251531	0.0514174	-0.281002	0.129447	-2.17079	0.0299474	0.0728719	927.979	922.524	934.624	770.243	762.994	745.726	997.167	1396.12	1025.72
MSMEG_0910	1.63898	0.550027	0.346726	1.58634	0.112661	NA	0.660167	0.331653	1.99054	0.0465318	NA	0	0	0	2.32351	4.00522	2.81938	1.56051	0	4.04223
MSMEG_0912	910.468	0.506681	0.0825356	6.13894	8.30725e-10	5.91318e-09	0.244845	0.0868918	2.81782	0.00483507	0.0153609	748.895	745.432	768.518	887.58	941.226	864.14	1011.6	1146.19	1080.62
MSMEG_0913	6279.76	0.378151	0.0929392	4.0688	4.72556e-05	0.000175506	0.313964	0.0934297	3.36042	0.000778228	0.00313871	4968.76	5642.22	5293.25	6504.66	6917.01	6423.96	6201.87	7593.24	6972.85
MSMEG_0914	166.642	-0.568908	0.123309	-4.61368	3.95609e-06	1.74089e-05	-0.223761	0.134461	-1.66413	0.0960858	0.187715	192.108	204.891	196.005	177.748	172.224	156.476	126.792	141.821	131.709
MSMEG_0915	873.362	-0.752296	0.121817	-6.17562	6.59048e-10	4.74775e-09	-0.619641	0.124636	-4.97159	6.64062e-07	4.95783e-06	1255.21	1157.27	1107.37	737.714	791.03	737.268	633.178	831.164	610.04
MSMEG_0916	788.408	-1.07542	0.0870403	-12.3554	4.55402e-35	2.51428e-33	-0.64536	0.0907225	-7.11356	1.1309e-12	1.90513e-11	1149.39	1073.88	1141.7	728.42	720.939	687.929	507.947	583.559	501.91
MSMEG_0917	566.493	-0.150377	0.0887663	-1.69408	0.0902501	0.153772	-0.312126	0.0955764	-3.26572	0.00109185	0.00422716	652.841	624.969	610.163	469.349	544.709	507.488	581.681	533.573	573.66
MSMEG_0918	217.597	-0.727806	0.216635	-3.35959	0.000780571	0.00230695	-0.358736	0.220423	-1.62749	0.103633	0.199375	353.283	244.016	238.085	211.439	220.287	202.995	126.792	234.818	126.657
MSMEG_0919	200.729	-0.232373	0.118577	-1.95967	0.0500342	0.0932024	-0.443916	0.132869	-3.34102	0.000834719	0.00333572	247.461	223.424	235.871	185.881	144.188	176.211	202.086	188.32	203.122
MSMEG_0920	238.751	-0.622915	0.126712	-4.91597	8.8343e-07	4.25212e-06	-0.402167	0.13531	-2.9722	0.00295674	0.0100913	262.113	328.443	301.206	194.013	258.336	228.37	193.504	194.132	188.638
MSMEG_0921	752.114	-0.832036	0.136699	-6.08661	1.15325e-09	8.08632e-09	-0.507937	0.139061	-3.65261	0.000259591	0.00118274	1046.82	934.879	1025.43	694.729	736.96	659.735	494.292	695.156	481.026
MSMEG_0923	1337.69	0.41712	0.0808311	5.16039	2.4643e-07	1.2819e-06	0.0556164	0.0841897	0.660608	0.508864	0.651449	1181.95	1161.39	1214.79	1232.62	1259.64	1209.51	1593.28	1714.64	1471.37
MSMEG_0924	535.842	-0.531662	0.0976715	-5.44337	5.22811e-08	2.96621e-07	-0.574145	0.104137	-5.51338	3.52015e-08	3.2166e-07	678.89	721.752	653.351	485.613	410.535	466.607	500.144	434.763	470.92
MSMEG_0925	97.929	0.133687	0.173104	0.772289	0.439943	0.550767	-0.0790122	0.189343	-0.417296	0.676462	0.786194	100.938	95.7531	96.3415	106.881	62.0809	100.088	119.379	96.4848	103.414
MSMEG_0926	235.324	-0.332183	0.114941	-2.89002	0.00385212	0.00977914	-0.244894	0.12519	-1.95618	0.0504445	0.112042	273.509	287.259	244.73	235.836	232.303	208.634	221.593	209.244	204.806
MSMEG_0927	173.349	-0.21706	0.127768	-1.69886	0.0893458	0.152429	-0.297288	0.141406	-2.10236	0.0355214	0.0841594	208.388	201.802	177.18	147.543	164.214	163.524	179.849	154.608	163.037
MSMEG_0929	1694.72	-0.724023	0.101936	-7.10274	1.22306e-12	1.24969e-11	-0.614559	0.103751	-5.9234	3.15352e-09	3.30441e-08	2259.71	2334.11	2194.82	1421.99	1503.96	1477.35	1528.13	1162.47	1369.98
MSMEG_0930	252.746	-0.304871	0.116387	-2.61946	0.00880689	0.0205546	-0.166907	0.125288	-1.33219	0.182798	0.307629	266.997	268.726	310.065	268.365	250.326	232.599	227.055	210.407	240.176
MSMEG_0931	2.0595	-0.258468	0.383996	-0.673101	0.500883	0.610558	-0.214631	0.369135	-0.581444	0.560941	0.696218	3.25607	3.08881	2.21475	3.48526	0	1.40969	1.56051	1.16247	2.35797
MSMEG_0932	778.337	0.0724005	0.105662	0.685211	0.493211	0.602977	0.425207	0.108057	3.93502	8.31906e-05	0.000422709	647.957	667.183	741.941	929.403	967.26	888.104	812.247	676.556	674.379
MSMEG_0933	1633.78	0.0333605	0.11571	0.288312	0.773108	0.839696	0.601095	0.11649	5.16006	2.46874e-07	1.95889e-06	1370.8	1339.51	1429.62	2130.66	2066.69	2141.32	1600.7	1149.68	1475.08
MSMEG_0934	1914.8	0.366097	0.104601	3.49992	0.00046539	0.00145117	0.455831	0.105822	4.30751	1.65102e-05	9.62485e-05	1489.65	1510.43	1682.1	2016.81	2381.1	2075.06	1892.12	2262.16	1923.77
MSMEG_0935	1992.57	0.00994242	0.074601	0.133275	0.893976	0.927627	0.0924165	0.0764441	1.20894	0.226685	0.362189	1908.05	1864.61	2055.29	1993.57	2214.88	2021.49	1915.14	2011.07	1949.03
MSMEG_0938	1304.95	-0.70153	0.0751619	-9.33359	1.02346e-20	2.16908e-19	-0.60555	0.0784675	-7.7172	1.1891e-14	2.51202e-13	1771.3	1665.9	1752.97	1153.62	1119.46	1119.29	1102.89	978.798	1080.29
MSMEG_0939	2995.73	-0.726442	0.136582	-5.31873	1.04494e-07	5.74496e-07	-0.164242	0.136999	-1.19886	0.230581	0.366525	3588.18	3660.24	3598.97	3178.56	3584.67	2887.04	1890.56	2672.51	1900.86
MSMEG_0940	3133.04	-0.40567	0.0625289	-6.48772	8.71442e-11	7.11227e-10	0.0904009	0.0635143	1.42331	0.154645	0.27101	3187.69	3381.22	3431.75	3663.01	3504.56	3487.57	2577.97	2506.28	2457.34
MSMEG_0941	1120.78	-0.619133	0.108555	-5.70343	1.17424e-08	7.2033e-08	0.0281871	0.109829	0.256646	0.797452	0.872774	1225.91	1272.59	1286.77	1255.86	1411.84	1202.47	863.744	689.343	878.512
MSMEG_0942	366.497	0.277281	0.11446	2.42252	0.0154133	0.0336454	0.536611	0.119394	4.49446	6.9748e-06	4.39353e-05	253.973	311.97	325.568	433.334	456.595	427.136	348.384	348.74	392.77
MSMEG_0944	1125.17	-0.52745	0.0899564	-5.86339	4.535e-09	2.95585e-08	-0.0844889	0.0920138	-0.91822	0.358504	0.50447	1310.57	1257.14	1281.23	1183.83	1313.71	1136.21	908.608	799.778	935.44
MSMEG_0945	1977.27	-0.434492	0.114131	-3.80697	0.000140678	0.000479137	-0.0163232	0.115021	-0.141916	0.887146	0.935412	2178.31	2335.14	2014.31	1954.07	2557.33	1955.24	1588.99	1646.05	1566.03
MSMEG_0946	5909.29	-0.408305	0.0756632	-5.39634	6.80133e-08	3.79972e-07	-0.0431493	0.0761632	-0.566537	0.571029	0.70414	6313.51	6821.12	6403.94	6099.21	6672.69	6199.82	5036.16	4545.25	5091.87
MSMEG_0947	1619.04	-0.20499	0.0842333	-2.4336	0.0149494	0.0327829	0.226104	0.085668	2.6393	0.00830775	0.0245754	1419.64	1679.28	1690.96	1909.92	1880.45	1835.42	1367.01	1362.41	1426.23
MSMEG_0948	1188.89	-0.310994	0.0899151	-3.45876	0.000542678	0.00166529	-0.501268	0.0933885	-5.36755	7.9812e-08	6.89953e-07	1339.87	1414.67	1508.24	964.256	953.242	1079.82	1086.51	1235.7	1117.68
MSMEG_0949	298.378	-0.390956	0.147084	-2.65805	0.00785941	0.0185609	-0.50646	0.154336	-3.28155	0.00103239	0.00402199	330.491	379.923	388.688	259.071	232.303	270.66	335.51	226.681	262.071
MSMEG_0950	6.59944	0.211707	0.381453	0.555003	0.578892	0.679407	0.523639	0.388494	1.34787	0.1777	0.300978	4.8841	8.23682	1.10737	12.7793	8.01043	5.63876	5.85192	5.81234	7.07391
MSMEG_0951	299.479	0.0293098	0.133448	0.219635	0.826156	0.879145	0.0550935	0.139959	0.39364	0.693847	0.799717	291.418	294.466	298.991	304.38	268.35	343.964	325.757	245.281	322.705
MSMEG_0955	4.60655	-0.257111	0.386704	-0.664878	0.506129	0.615334	-0.149141	0.392407	-0.380067	0.703895	0.806943	8.14016	4.11841	4.4295	3.48526	6.00782	4.22907	4.68154	2.32494	4.04223
MSMEG_0957	391.832	-0.551965	0.114823	-4.80711	1.5313e-06	7.15042e-06	-0.271713	0.120285	-2.25892	0.0238885	0.0602717	434.685	490.091	476.171	357.82	434.566	373.568	295.717	360.365	303.504
MSMEG_0958	201.451	0.474637	0.128814	3.68468	0.000228988	0.000752978	0.242733	0.140145	1.73201	0.0832716	0.167857	177.456	182.24	147.281	205.63	208.271	188.898	247.341	212.732	243.208
MSMEG_0959	484.894	0.0301368	0.101255	0.297634	0.765983	0.834679	-0.17717	0.108088	-1.63912	0.101188	0.195761	520.97	474.647	509.392	393.835	460.6	476.475	534.475	478.937	514.711
MSMEG_0960	62.4521	0.223272	0.223309	0.999831	0.317393	0.426883	-0.384892	0.244736	-1.57268	0.115793	0.217484	52.097	62.8058	78.6236	44.1467	40.0522	59.207	88.9492	52.311	83.8763
MSMEG_0961	210.328	-0.300176	0.134366	-2.23402	0.0254821	0.0519606	0.145521	0.141014	1.03196	0.302091	0.444682	211.644	217.246	214.831	235.836	266.347	217.092	159.172	208.082	162.7
MSMEG_0962	68.6447	0.236408	0.179536	1.31677	0.187915	0.280337	0.113508	0.199484	0.56901	0.569349	0.702464	66.7493	58.6874	65.3351	66.22	58.0756	80.3523	77.6355	66.2607	78.4867
MSMEG_0963	308.443	0.00453782	0.113021	0.0401502	0.967973	0.979302	-0.0755497	0.121582	-0.621389	0.534344	0.673439	333.747	307.851	297.884	303.218	294.383	288.986	305.86	355.715	288.346
MSMEG_0964	514.175	0.228527	0.115519	1.97826	0.0478993	0.0898112	-0.136099	0.121573	-1.11948	0.262934	0.403334	507.946	474.647	513.822	448.437	472.616	438.413	541.888	690.506	539.301
MSMEG_0965	11109.4	-0.348389	0.117976	-2.95306	0.00314645	0.00814186	-0.542212	0.118257	-4.58502	4.53944e-06	2.94414e-05	15956.3	13052.3	11610.8	9327.72	9418.27	8895.14	10038.8	11620	10065.2
MSMEG_0966	48.8245	2.32379	0.24048	9.66313	4.3244e-22	1.01833e-20	0.875215	0.271221	3.22695	0.00125119	0.0047654	17.9084	15.444	15.5032	33.6909	26.0339	39.4713	93.2406	90.6725	107.456
MSMEG_0967	32.2485	2.28748	0.274127	8.34458	7.14684e-17	1.07694e-15	1.07726	0.303639	3.54782	0.000388438	0.00170705	6.51213	10.296	11.0737	26.7203	24.0313	25.3744	67.102	55.7985	63.3283
MSMEG_0968	647.265	0.498414	0.131699	3.78449	0.000154027	0.00052082	0.14584	0.135566	1.07579	0.282023	0.422938	457.477	534.364	653.351	629.671	534.696	662.554	833.704	745.142	774.424
MSMEG_0970	345.713	0.985455	0.212913	4.62844	3.68428e-06	1.62892e-05	-0.0033357	0.218175	-0.0152891	0.987802	0.993852	214.9	265.638	280.166	247.454	234.305	277.709	666.729	318.516	605.998
MSMEG_0971	861.579	0.878589	0.0856244	10.261	1.0565e-24	2.85648e-23	0.279692	0.0909469	3.07533	0.00210272	0.00757393	667.493	610.554	626.774	748.17	817.064	754.184	1154.78	1253.14	1122.06
MSMEG_0972	238.634	1.38228	0.130923	10.5579	4.66797e-26	1.37527e-24	0.541628	0.143419	3.77653	0.000159026	0.00076486	128.615	135.908	152.818	214.925	184.24	215.683	383.886	332.466	399.17
MSMEG_0973	1171.71	0.506343	0.0922366	5.48961	4.02811e-08	2.32146e-07	0.587859	0.0944884	6.22149	4.92461e-10	5.89338e-09	866.113	947.235	860.43	1333.69	1483.93	1239.12	1272.99	1208.97	1332.93
MSMEG_0975	427.8	0.499337	0.100614	4.96292	6.94421e-07	3.40474e-06	0.534612	0.106401	5.02451	5.04731e-07	3.82477e-06	328.863	335.65	329.997	470.51	458.597	520.175	479.467	432.438	494.5
MSMEG_0976	228.706	-0.807057	0.12191	-6.62012	3.589e-11	3.08635e-10	-0.829526	0.134313	-6.17608	6.57127e-10	7.63051e-09	328.863	304.762	336.642	189.366	164.214	179.031	168.925	212.732	173.816
MSMEG_0977	382.24	-0.754899	0.128643	-5.86819	4.40578e-09	2.88306e-08	-0.235358	0.132528	-1.77591	0.0757484	0.155667	452.593	472.588	489.459	342.717	466.608	397.532	286.744	234.818	297.104
MSMEG_0978	740.18	-0.482185	0.145092	-3.3233	0.000889608	0.0025942	-0.517359	0.147985	-3.49602	0.000472257	0.00203058	890.534	947.235	945.697	612.244	658.858	649.867	772.454	484.749	699.98
MSMEG_0979	217.45	-1.02364	0.127461	-8.03102	9.66691e-16	1.31767e-14	-0.352419	0.133779	-2.63434	0.00843003	0.0248253	297.93	296.526	269.092	218.41	258.336	200.176	149.419	139.496	127.667
MSMEG_0980	18.537	0.37124	0.310575	1.19533	0.231957	0.332815	-0.130942	0.335446	-0.390353	0.696276	0.801284	9.7682	24.7105	16.6106	22.0733	10.013	12.6872	29.6497	19.762	21.5586
MSMEG_0981	5.10784	0.535354	0.39092	1.36947	0.170852	0.259777	0.0440768	0.391876	0.112477	0.910446	0.94781	4.8841	4.11841	2.21475	5.80877	6.00782	0	3.90128	11.6247	7.41076
MSMEG_0982	44.8593	0.724239	0.219414	3.30079	0.000964143	0.00279295	0.636575	0.239186	2.66142	0.00778113	0.0231907	27.6766	28.8289	35.436	49.9554	46.06	54.9779	48.3759	53.4735	58.9492
MSMEG_0983	348.635	0.0607263	0.102626	0.591721	0.554037	0.657197	0.0459301	0.110519	0.415587	0.677713	0.78723	312.582	353.154	348.823	361.306	362.472	329.867	358.528	375.477	335.505
MSMEG_0984	62.2454	0.801118	0.191191	4.19014	2.7878e-05	0.000108058	0.571387	0.21095	2.70864	0.006756	0.02054	48.841	41.1841	40.9728	68.5435	62.0809	67.6651	82.317	67.4231	81.1815
MSMEG_0985	844.902	0.018628	0.0800785	0.232621	0.816056	0.871078	-0.128444	0.0849619	-1.51178	0.130589	0.238524	929.607	851.481	818.349	763.272	815.062	795.065	862.183	904.4	864.701
MSMEG_0986	291.778	0.193685	0.0995013	1.94656	0.0515876	0.0955811	0.0656231	0.109838	0.597451	0.550206	0.68593	271.881	267.697	283.488	290.439	276.36	293.215	310.542	312.704	319.673
MSMEG_0987	1027.95	-0.11084	0.160655	-0.689927	0.49024	0.600387	-0.135949	0.162292	-0.837682	0.402209	0.550638	1007.75	1070.79	1195.96	1057.2	845.101	1061.5	1185.6	741.654	1086.01
MSMEG_0989	1221.05	-0.491248	0.114252	-4.2997	1.71026e-05	6.85147e-05	-0.120511	0.1158	-1.04068	0.298023	0.440497	1372.43	1440.41	1380.9	1346.47	1231.6	1270.13	1079.48	803.265	1064.79
MSMEG_0991	373.843	-0.293852	0.141923	-2.0705	0.0384052	0.0744973	0.0866472	0.145569	0.595232	0.551688	0.687387	361.423	394.338	418.587	434.496	346.451	465.198	342.923	256.905	344.263
MSMEG_0992	114.218	-0.502986	0.144731	-3.47531	0.000510259	0.00157312	-0.118248	0.157243	-0.752007	0.452047	0.599961	143.267	125.612	127.348	128.955	122.159	109.956	92.4604	82.5352	95.6662
MSMEG_0993	120.099	-0.478274	0.143238	-3.33901	0.000840776	0.00246273	-0.290923	0.157614	-1.8458	0.0649215	0.137529	130.243	136.937	161.677	115.014	116.151	118.414	108.065	92.9974	101.393
MSMEG_0995	6.92873	-0.191791	0.368264	-0.5208	0.602506	0.700242	-0.162438	0.382944	-0.424183	0.671432	0.783119	8.14016	7.20722	8.85899	5.80877	4.00522	9.86783	8.58282	3.4874	6.4002
MSMEG_0996	8.80337	-0.526022	0.361652	-1.4545	0.145808	0.22776	-0.808045	0.380258	-2.12499	0.0335872	0.0802485	19.5364	8.23682	13.2885	4.64702	6.00782	5.63876	11.3137	3.4874	7.07391
MSMEG_0997	5.43962	0.133168	0.387954	0.343258	0.731404	0.806533	0.275454	0.39244	0.701901	0.482741	0.628539	6.51213	6.17762	1.10737	4.64702	10.013	5.63876	5.46179	2.32494	7.07391
MSMEG_0998	12.4814	-0.327317	0.319053	-1.0259	0.304938	0.413678	-0.563071	0.349348	-1.61178	0.10701	0.204623	13.0243	16.4736	17.718	5.80877	12.0156	11.2775	9.7532	12.7871	13.4741
MSMEG_0999	163.71	-0.443434	0.13628	-3.25385	0.00113854	0.0032452	-0.33632	0.148396	-2.26636	0.0234291	0.0593404	214.9	172.973	199.327	141.734	178.232	143.788	150.98	133.684	137.773
MSMEG_1000	3.7774	-0.123522	0.390061	-0.316674	0.751491	0.823294	-0.426027	0.390976	-1.08965	0.275868	0.416751	4.8841	6.17762	3.32212	2.32351	4.00522	1.40969	4.68154	3.4874	3.70538
MSMEG_1001	2020.97	0.987004	0.149627	6.59645	4.21131e-11	3.5701e-10	0.565923	0.150664	3.7562	0.000172513	0.000820717	1253.59	1320.98	1434.05	2074.89	1792.33	2159.64	3080.06	2035.48	3037.74
MSMEG_1002	62.9051	0.235615	0.240965	0.977799	0.328174	0.43841	0.49927	0.250304	1.99465	0.0460807	0.104074	45.5849	66.9242	42.0802	88.2933	62.0809	77.5329	81.5368	44.1738	57.9387
MSMEG_1003	0	NA	NA	NA	NA	NA	NA	NA	NA	NA	NA	0	0	0	0	0	0	0	0	0
MSMEG_1004	0	NA	NA	NA	NA	NA	NA	NA	NA	NA	NA	0	0	0	0	0	0	0	0	0
MSMEG_1005	0	NA	NA	NA	NA	NA	NA	NA	NA	NA	NA	0	0	0	0	0	0	0	0	0
MSMEG_1006	0	NA	NA	NA	NA	NA	NA	NA	NA	NA	NA	0	0	0	0	0	0	0	0	0
MSMEG_1007	0	NA	NA	NA	NA	NA	NA	NA	NA	NA	NA	0	0	0	0	0	0	0	0	0
MSMEG_1008	0	NA	NA	NA	NA	NA	NA	NA	NA	NA	NA	0	0	0	0	0	0	0	0	0
MSMEG_1009	0	NA	NA	NA	NA	NA	NA	NA	NA	NA	NA	0	0	0	0	0	0	0	0	0
MSMEG_1010	0	NA	NA	NA	NA	NA	NA	NA	NA	NA	NA	0	0	0	0	0	0	0	0	0
MSMEG_1011	0	NA	NA	NA	NA	NA	NA	NA	NA	NA	NA	0	0	0	0	0	0	0	0	0
MSMEG_1012	0	NA	NA	NA	NA	NA	NA	NA	NA	NA	NA	0	0	0	0	0	0	0	0	0
MSMEG_1013	0	NA	NA	NA	NA	NA	NA	NA	NA	NA	NA	0	0	0	0	0	0	0	0	0
MSMEG_1015	0	NA	NA	NA	NA	NA	NA	NA	NA	NA	NA	0	0	0	0	0	0	0	0	0
MSMEG_1016	0	NA	NA	NA	NA	NA	NA	NA	NA	NA	NA	0	0	0	0	0	0	0	0	0
MSMEG_1017	0	NA	NA	NA	NA	NA	NA	NA	NA	NA	NA	0	0	0	0	0	0	0	0	0
MSMEG_1018	0	NA	NA	NA	NA	NA	NA	NA	NA	NA	NA	0	0	0	0	0	0	0	0	0
MSMEG_1019	0.222512	0	0.146694	0	1	NA	0.0441611	0.14585	0.302785	0.762054	NA	0	0	0	0	2.00261	0	0	0	0
MSMEG_1020	0	NA	NA	NA	NA	NA	NA	NA	NA	NA	NA	0	0	0	0	0	0	0	0	0
MSMEG_1021	0	NA	NA	NA	NA	NA	NA	NA	NA	NA	NA	0	0	0	0	0	0	0	0	0
MSMEG_1022	0	NA	NA	NA	NA	NA	NA	NA	NA	NA	NA	0	0	0	0	0	0	0	0	0
MSMEG_1023	0	NA	NA	NA	NA	NA	NA	NA	NA	NA	NA	0	0	0	0	0	0	0	0	0
MSMEG_1024	0	NA	NA	NA	NA	NA	NA	NA	NA	NA	NA	0	0	0	0	0	0	0	0	0
MSMEG_1025	0	NA	NA	NA	NA	NA	NA	NA	NA	NA	NA	0	0	0	0	0	0	0	0	0
MSMEG_1026	0	NA	NA	NA	NA	NA	NA	NA	NA	NA	NA	0	0	0	0	0	0	0	0	0
MSMEG_1027	0	NA	NA	NA	NA	NA	NA	NA	NA	NA	NA	0	0	0	0	0	0	0	0	0
MSMEG_1028	0.19406	-0.00979412	0.161609	-0.060604	0.951675	NA	0.0534129	0.159778	0.334295	0.738157	NA	0	0	0	0	0	1.40969	0	0	0.336853
MSMEG_1029	0	NA	NA	NA	NA	NA	NA	NA	NA	NA	NA	0	0	0	0	0	0	0	0	0
MSMEG_1030	0	NA	NA	NA	NA	NA	NA	NA	NA	NA	NA	0	0	0	0	0	0	0	0	0
MSMEG_1031	0	NA	NA	NA	NA	NA	NA	NA	NA	NA	NA	0	0	0	0	0	0	0	0	0
MSMEG_1032	0	NA	NA	NA	NA	NA	NA	NA	NA	NA	NA	0	0	0	0	0	0	0	0	0
MSMEG_1034	0	NA	NA	NA	NA	NA	NA	NA	NA	NA	NA	0	0	0	0	0	0	0	0	0
MSMEG_1035	0	NA	NA	NA	NA	NA	NA	NA	NA	NA	NA	0	0	0	0	0	0	0	0	0
MSMEG_1036	0	NA	NA	NA	NA	NA	NA	NA	NA	NA	NA	0	0	0	0	0	0	0	0	0
MSMEG_1037	0	NA	NA	NA	NA	NA	NA	NA	NA	NA	NA	0	0	0	0	0	0	0	0	0
MSMEG_1038	0	NA	NA	NA	NA	NA	NA	NA	NA	NA	NA	0	0	0	0	0	0	0	0	0
MSMEG_1039	0	NA	NA	NA	NA	NA	NA	NA	NA	NA	NA	0	0	0	0	0	0	0	0	0
MSMEG_1042	0	NA	NA	NA	NA	NA	NA	NA	NA	NA	NA	0	0	0	0	0	0	0	0	0
MSMEG_1043	0	NA	NA	NA	NA	NA	NA	NA	NA	NA	NA	0	0	0	0	0	0	0	0	0
MSMEG_1044	0	NA	NA	NA	NA	NA	NA	NA	NA	NA	NA	0	0	0	0	0	0	0	0	0
MSMEG_1045	0	NA	NA	NA	NA	NA	NA	NA	NA	NA	NA	0	0	0	0	0	0	0	0	0
MSMEG_1046	0.0433476	-0.00606888	0.146665	-0.0413791	0.966994	NA	0	0.14585	0	1	NA	0	0	0	0	0	0	0.390128	0	0
MSMEG_1047	0	NA	NA	NA	NA	NA	NA	NA	NA	NA	NA	0	0	0	0	0	0	0	0	0
MSMEG_1048	0	NA	NA	NA	NA	NA	NA	NA	NA	NA	NA	0	0	0	0	0	0	0	0	0
MSMEG_1049	0.129163	-0.000399826	0.146785	-0.00272388	0.997827	NA	0	0.14585	0	1	NA	0	0	0	0	0	0	0	1.16247	0
MSMEG_1050	0	NA	NA	NA	NA	NA	NA	NA	NA	NA	NA	0	0	0	0	0	0	0	0	0
MSMEG_1051	0	NA	NA	NA	NA	NA	NA	NA	NA	NA	NA	0	0	0	0	0	0	0	0	0
MSMEG_1052	0	NA	NA	NA	NA	NA	NA	NA	NA	NA	NA	0	0	0	0	0	0	0	0	0
MSMEG_1053	0	NA	NA	NA	NA	NA	NA	NA	NA	NA	NA	0	0	0	0	0	0	0	0	0
MSMEG_1054	0	NA	NA	NA	NA	NA	NA	NA	NA	NA	NA	0	0	0	0	0	0	0	0	0
MSMEG_1055	0	NA	NA	NA	NA	NA	NA	NA	NA	NA	NA	0	0	0	0	0	0	0	0	0
MSMEG_1056	0	NA	NA	NA	NA	NA	NA	NA	NA	NA	NA	0	0	0	0	0	0	0	0	0
MSMEG_1058	0	NA	NA	NA	NA	NA	NA	NA	NA	NA	NA	0	0	0	0	0	0	0	0	0
MSMEG_1059	0	NA	NA	NA	NA	NA	NA	NA	NA	NA	NA	0	0	0	0	0	0	0	0	0
MSMEG_1060	3479.48	-0.749492	0.114773	-6.53022	6.5673e-11	5.42049e-10	-0.508585	0.11545	-4.40525	1.05662e-05	6.39962e-05	4591.05	4564.23	4538.02	2920.65	3528.6	3108.37	2377.05	3146.8	2540.54
MSMEG_1061	559.959	0.441903	0.100721	4.38737	1.14727e-05	4.71393e-05	0.20028	0.106366	1.88293	0.0597092	0.128325	470.501	469.499	488.352	554.157	564.736	528.634	595.726	730.03	637.999
MSMEG_1062	423.711	0.507764	0.1884	2.69514	0.00703592	0.0168095	-0.0244064	0.192534	-0.126764	0.899127	0.942899	379.332	366.539	367.648	385.702	340.443	365.11	655.805	341.766	611.051
MSMEG_1063	199.431	0.33507	0.13522	2.47797	0.0132131	0.0295002	0.0843751	0.146427	0.576228	0.564461	0.698187	170.943	193.565	174.965	177.748	196.256	202.995	244.22	190.645	243.544
MSMEG_1064	1054.44	0.258395	0.112012	2.30685	0.0210631	0.0441078	-0.809907	0.117169	-6.91233	4.76767e-12	7.4051e-11	1328.47	1064.61	1050.9	661.038	570.743	694.977	1430.99	1307.78	1380.42
MSMEG_1065	178.727	0.307005	0.161952	1.89565	0.0580061	0.105949	-0.769612	0.179893	-4.27816	1.88447e-05	0.0001087	239.321	176.062	158.354	118.499	108.141	94.4492	229.785	269.693	214.238
MSMEG_1066	227.484	0.184167	0.133261	1.38201	0.166969	0.254817	-0.921095	0.152066	-6.05719	1.3852e-09	1.54775e-08	278.394	262.549	234.763	152.19	138.18	105.727	315.614	266.205	293.736
MSMEG_1067	140.387	0.566866	0.169322	3.34785	0.000814405	0.00239509	0.617884	0.17821	3.46717	0.000525964	0.00222797	79.7736	110.167	117.382	152.19	162.211	176.211	181.41	130.196	153.942
MSMEG_1068	199.03	-0.0322743	0.120778	-0.267219	0.7893	0.852491	0.183957	0.130291	1.4119	0.15798	0.275166	185.596	196.654	190.468	217.248	234.305	205.815	199.355	185.995	175.837
MSMEG_1069	18.8129	0.703102	0.288398	2.43796	0.0147704	0.0324389	0.0909372	0.321383	0.282956	0.777211	0.859642	19.5364	13.3848	12.1811	18.5881	12.0156	15.5066	23.4077	26.7368	27.9588
MSMEG_1070	7.63673	0.553588	0.375747	1.4733	0.14067	0.221646	0.426663	0.386503	1.10391	0.269634	0.410259	11.3962	3.08881	2.21475	9.29403	4.00522	11.2775	9.36307	6.97481	11.1161
MSMEG_1071	18.331	0.342968	0.293424	1.16885	0.242465	0.345327	0.268286	0.317627	0.844659	0.398302	0.546852	17.9084	15.444	13.2885	20.9116	24.0313	14.0969	22.6274	15.1121	21.5586
MSMEG_1073	1346.38	-0.195423	0.113463	-1.72235	0.0850054	0.146277	0.038041	0.114997	0.3308	0.740796	0.832967	1361.04	1379.67	1446.23	1480.07	1315.71	1501.32	1338.92	1009.02	1285.43
MSMEG_1074	177.558	0.24877	0.141359	1.75985	0.0784338	0.136974	0.0411358	0.153068	0.268742	0.788128	0.868064	148.151	186.358	159.462	190.528	172.224	148.017	183.75	195.295	214.238
MSMEG_1076	35976.3	-0.118159	0.0803069	-1.47135	0.141198	0.222293	0.274901	0.0803762	3.42018	0.000625787	0.00260189	35634.4	33427.1	34283.2	40415.1	45487.2	39398	30707.8	33791.8	30642.5
MSMEG_1077	121.02	0.20775	0.175264	1.18535	0.235878	0.337335	0.0634591	0.187455	0.33853	0.734964	0.829369	115.59	105.019	121.811	133.602	96.1252	124.053	120.55	112.759	159.668
MSMEG_1078	375.651	0.524414	0.118112	4.43997	8.99708e-06	3.7341e-05	0.236229	0.125212	1.88663	0.0592104	0.127796	266.997	312.999	344.393	355.497	356.464	387.665	415.486	496.374	444.982
MSMEG_1079	502.511	-0.0306145	0.112175	-0.272916	0.784917	0.849713	0.996372	0.11333	8.7918	1.47189e-18	4.69432e-17	380.96	372.716	372.078	699.376	881.148	709.074	354.236	392.914	360.096
MSMEG_1080	390.493	0.181658	0.143528	1.26566	0.205633	0.301969	1.46939	0.143713	10.2245	1.54079e-24	8.03414e-23	231.181	219.305	248.052	668.009	742.968	597.708	226.664	320.841	259.713
MSMEG_1081	31.4879	0.540861	0.259724	2.08244	0.037302	0.0725715	1.29707	0.269148	4.81917	1.44153e-06	1.02721e-05	13.0243	20.5921	17.718	44.1467	56.073	50.7488	28.8695	23.2494	28.9693
MSMEG_1082	24.9151	-0.330734	0.264476	-1.25053	0.211107	0.308161	0.503602	0.276216	1.82322	0.0682705	0.143165	17.9084	23.6809	25.4696	31.3674	40.0522	32.4229	17.5558	18.5995	17.1795
MSMEG_1083	0.561702	-0.295951	0.279602	-1.05847	0.289841	NA	-0.178781	0.261369	-0.684017	0.493964	NA	0	2.05921	1.10737	1.16175	0	0	0.390128	0	0.336853
MSMEG_1084	9.71004	-0.180791	0.346432	-0.521866	0.601764	0.699626	-0.228658	0.367375	-0.622409	0.533673	0.672723	6.51213	13.3848	12.1811	5.80877	8.01043	12.6872	7.41243	11.6247	9.76873
MSMEG_1085	8.9245	0.729228	0.364132	2.00265	0.0452151	0.0855843	0.739149	0.377421	1.95842	0.0501809	0.111532	8.14016	2.05921	5.53687	13.9411	8.01043	11.2775	13.2644	6.97481	11.1161
MSMEG_1086	11.0227	0.960524	0.349844	2.74558	0.00604043	0.0146441	0.429302	0.370883	1.15751	0.247063	0.385743	4.8841	10.296	3.32212	11.6175	12.0156	7.04845	13.2644	20.9244	15.8321
MSMEG_1087	31.5957	0.611294	0.257805	2.37115	0.017733	0.0380365	0.778884	0.274937	2.83295	0.004612	0.0147929	22.7925	20.5921	18.8254	41.8232	44.0574	31.0132	30.43	44.1738	30.6536
MSMEG_1089	38.3167	0.25025	0.242207	1.03321	0.301507	0.410294	-0.0211905	0.26567	-0.0797626	0.936426	0.964354	27.6766	36.0361	40.9728	32.5291	46.06	28.1938	36.672	56.9609	39.7486
MSMEG_1090	201.378	0.489761	0.140693	3.48107	0.000499421	0.00154409	0.118591	0.152063	0.779881	0.435461	0.583159	179.084	167.825	167.213	181.234	184.24	193.127	222.763	295.267	221.649
MSMEG_1092	26.3328	0.382416	0.256791	1.48921	0.136432	0.216459	0.349199	0.280966	1.24285	0.213923	0.347545	24.4205	23.6809	16.6106	29.0439	26.0339	29.6035	30.43	30.2242	26.9482
MSMEG_1093	34.9381	0.130636	0.231069	0.565357	0.571831	0.673165	0.273647	0.252333	1.08447	0.278158	0.418766	30.9326	30.8881	31.0065	33.6909	40.0522	42.2907	31.2102	40.6864	33.6853
MSMEG_1096	11.833	0.850284	0.346699	2.45252	0.0141861	0.031318	0.885495	0.362259	2.44437	0.0145106	0.0394925	4.8841	3.08881	9.96637	13.9411	18.0235	14.0969	11.7038	13.9496	16.8426
MSMEG_1097	10107.9	0.425959	0.175064	2.43316	0.0149675	0.0328008	-0.161541	0.175274	-0.921646	0.356713	0.502812	7656.64	9292.16	11009.5	8606.27	7065.2	9168.62	14949.3	9396.23	13826.8
MSMEG_1098	166.162	0.00653717	0.165152	0.0395828	0.968426	0.979307	0.00218091	0.174269	0.0125146	0.990015	0.994861	195.364	151.352	155.032	164.969	140.183	190.308	143.957	159.258	195.038
MSMEG_1099	14.6253	0.198397	0.316714	0.626423	0.531037	0.636968	0.769147	0.330814	2.32501	0.0200714	0.0521839	11.3962	12.3552	7.75162	19.7498	22.0287	21.1453	13.2644	10.4622	13.4741
MSMEG_1100	32.9705	0.538664	0.247933	2.17262	0.0298088	0.0597814	0.625174	0.266799	2.34324	0.019117	0.0501192	22.7925	22.6513	25.4696	31.3674	46.06	42.2907	36.2819	29.0617	40.7592
MSMEG_1101	183.134	1.61255	0.149998	10.7505	5.89686e-27	1.86261e-25	2.02208	0.155265	13.0234	9.0058e-39	1.29884e-36	53.7251	66.9242	69.7646	291.6	246.321	293.215	208.328	216.219	202.112
MSMEG_1102	205.996	1.31734	0.139332	9.4547	3.23961e-21	7.09474e-20	1.69115	0.144777	11.681	1.59349e-31	1.3959e-29	70.0054	100.901	90.8047	302.056	286.373	310.132	230.956	244.118	218.617
MSMEG_1103	221.723	0.139041	0.176883	0.786063	0.431831	0.543688	0.217396	0.182479	1.19135	0.233516	0.369954	193.736	199.743	217.045	226.542	234.305	256.564	275.821	154.608	237.144
MSMEG_1104	6.68888	-0.48497	0.38418	-1.26235	0.206823	0.303278	0.148113	0.388967	0.380785	0.703363	0.806943	13.0243	2.05921	7.75162	8.13228	4.00522	12.6872	3.51115	4.64987	4.37908
MSMEG_1105	12.4193	0.0856954	0.322697	0.26556	0.790578	0.85325	0.228823	0.344197	0.664802	0.506177	0.648768	11.3962	9.26642	13.2885	13.9411	12.0156	15.5066	10.9236	11.6247	13.811
MSMEG_1106	32.4042	0.583259	0.247905	2.35276	0.0186348	0.0397115	-0.0032565	0.277759	-0.0117242	0.990646	0.99519	34.1887	26.7697	22.1475	32.5291	32.0417	16.9163	46.4252	39.5239	41.096
MSMEG_1107	26.361	0.334804	0.269473	1.24244	0.214074	0.311648	-0.0828924	0.297309	-0.278809	0.780391	0.862289	19.5364	27.7993	24.3622	18.5881	30.0391	21.1453	24.1879	34.874	36.7169
MSMEG_1108	922.689	-0.369776	0.100869	-3.66592	0.000246455	0.000805178	-0.36046	0.104218	-3.45872	0.000542747	0.00229315	1074.5	1136.68	1045.36	894.551	843.098	786.607	778.696	949.736	794.972
MSMEG_1109	1224.14	-0.436504	0.113708	-3.83882	0.000123629	0.000424814	-0.385006	0.11586	-3.32301	0.000890508	0.00352024	1321.96	1528.96	1566.93	1173.37	1029.34	1158.76	1220.71	952.061	1065.13
MSMEG_1110	343.616	-0.507717	0.0987538	-5.14124	2.72931e-07	1.4075e-06	-0.274829	0.106418	-2.58254	0.00980769	0.0282989	407.008	402.575	418.587	365.953	332.433	310.132	287.134	276.667	292.051
MSMEG_1111	263.102	0.332557	0.118937	2.79609	0.00517252	0.0127326	0.944438	0.123403	7.65326	1.95949e-14	4.04837e-13	179.084	183.269	197.113	381.055	380.496	336.916	253.973	231.331	224.681
MSMEG_1112	13674.3	0.291002	0.112025	2.59766	0.0093862	0.0217292	0.358847	0.112189	3.1986	0.00138094	0.00520527	12047.4	11099.1	11833.4	15265.4	15277.9	14550.8	12388.5	16968.5	13637.1
MSMEG_1113	95.9609	-0.442731	0.168021	-2.63497	0.00841459	0.0197262	-0.0578363	0.179842	-0.321596	0.747759	0.838215	109.078	116.345	98.5563	109.205	90.1174	108.546	70.6132	70.9105	90.2765
MSMEG_1114	217.161	-0.838434	0.14096	-5.94805	2.71358e-09	1.83041e-08	-1.22427	0.155728	-7.86157	3.79351e-15	8.56473e-14	304.442	344.917	351.038	141.734	130.17	140.969	212.62	145.308	183.248
MSMEG_1116	53.3331	0.184678	0.209581	0.881178	0.378221	0.490993	-0.181245	0.233767	-0.775321	0.43815	0.585329	52.097	55.5985	49.8318	38.3379	46.06	53.5682	48.766	72.073	63.6652
MSMEG_1117	28.0626	-0.204469	0.267077	-0.76558	0.443926	0.554697	-0.0330589	0.286869	-0.11524	0.908255	0.946611	26.0485	29.8585	31.0065	24.3968	36.0469	26.7841	25.3583	34.874	18.19
MSMEG_1118	133.427	-0.283364	0.154975	-1.82845	0.0674826	0.120413	0.590287	0.15984	3.69298	0.000221639	0.00102547	112.334	116.345	127.348	177.748	222.29	153.656	93.2406	96.4848	101.393
MSMEG_1119	43.6544	-0.164994	0.216508	-0.762068	0.446019	0.55682	-0.0981148	0.238072	-0.412122	0.68025	0.789201	48.841	44.2729	46.5097	52.2789	36.0469	38.0616	39.0128	51.1486	36.7169
MSMEG_1120	95.9803	-0.320114	0.188506	-1.69816	0.089477	0.152613	0.0315454	0.198467	0.158946	0.873712	0.925917	115.59	97.8123	96.3415	98.7491	122.159	97.2686	81.9269	56.9609	97.0136
MSMEG_1121	30.3581	0.0521354	0.257462	0.202498	0.839528	0.889342	0.392172	0.273656	1.43308	0.151834	0.26722	26.0485	29.8585	24.3622	46.4702	36.0469	26.7841	24.5781	26.7368	32.3379
MSMEG_1122	5.23439	-0.174194	0.380846	-0.457387	0.647393	0.737025	-0.308742	0.390986	-0.78965	0.429732	0.577725	6.51213	8.23682	4.4295	3.48526	2.00261	7.04845	4.68154	4.64987	6.06335
MSMEG_1123	164.17	-0.144113	0.133506	-1.07945	0.280389	0.387334	-0.176078	0.146441	-1.20239	0.229214	0.365075	177.456	158.559	193.79	151.028	146.19	167.753	149.419	176.695	156.636
MSMEG_1124	35.6622	-0.114059	0.242467	-0.470411	0.638061	0.729943	0.164969	0.259996	0.634505	0.525751	0.66606	29.3046	44.2729	28.7917	37.1761	46.06	36.6519	27.6991	40.6864	30.3167
MSMEG_1125	34.0345	0.0164342	0.223158	0.0736436	0.941294	0.961191	-0.363258	0.257068	-1.41308	0.157631	0.274901	42.3288	33.9769	35.436	25.5586	26.0339	31.0132	38.2326	38.3614	35.3695
MSMEG_1126	23.3457	-0.524662	0.274572	-1.91084	0.0560258	0.102818	-0.675361	0.303273	-2.22691	0.0259535	0.0644911	35.8167	27.7993	33.2212	20.9116	12.0156	19.7357	27.309	15.1121	18.19
MSMEG_1127	50.5536	-0.523515	0.20005	-2.61692	0.00887262	0.0207007	-0.285227	0.219999	-1.29649	0.194807	0.322877	60.2372	55.5985	68.6572	52.2789	48.0626	47.9294	47.5956	34.874	39.7486
MSMEG_1128	8.24732	-0.0370426	0.368244	-0.100592	0.919874	0.946823	0.297383	0.379376	0.783875	0.433114	0.581082	4.8841	9.26642	6.64424	5.80877	12.0156	12.6872	6.24205	11.6247	5.05279
MSMEG_1129	4.7821	-0.0220038	0.385943	-0.0570132	0.954535	0.969575	0.133627	0.392295	0.340629	0.733383	0.828603	4.8841	4.11841	4.4295	6.97053	6.00782	2.81938	4.29141	5.81234	3.70538
MSMEG_1130	518.249	0.612036	0.175441	3.48856	0.000485623	0.00150782	0.35504	0.178431	1.98979	0.0466138	0.104809	354.911	420.078	434.091	561.127	476.621	531.453	756.458	435.925	693.58
MSMEG_1131	10566.5	0.980773	0.0795664	12.3265	6.52491e-35	3.57239e-33	0.512054	0.0800005	6.40064	1.54731e-10	1.98552e-09	7186.14	6875.69	7455.95	10592.9	10155.2	10049.7	13213.6	15568.9	14000.6
MSMEG_1132	159.004	0.607051	0.156477	3.8795	0.000104671	0.000365404	0.181888	0.169016	1.07616	0.281858	0.422883	109.078	132.819	145.066	135.925	150.196	160.705	207.158	165.07	225.018
MSMEG_1133	1077.6	0.175596	0.0894652	1.96273	0.0496771	0.0926423	0.379106	0.0918575	4.12711	3.6735e-05	0.000199958	869.369	961.649	988.885	1265.15	1263.65	1161.58	1058.81	992.747	1136.54
MSMEG_1134	1738.25	0.937741	0.107961	8.68589	3.75794e-18	6.28236e-17	1.45044	0.108709	13.3424	1.31165e-40	2.0518e-38	921.466	905.021	901.402	2471.05	2549.32	2585.37	1601.87	2077.33	1631.38
MSMEG_1135	9.97419	-0.0521008	0.377778	-0.137914	0.890308	0.925087	1.09565	0.379976	2.88346	0.0039333	0.0129203	11.3962	5.14801	1.10737	12.7793	30.0391	12.6872	5.07166	5.81234	5.7265
MSMEG_1136	315.909	0.0446566	0.120809	0.369646	0.711646	0.791253	-0.137652	0.129076	-1.06644	0.286225	0.427678	315.838	354.183	300.098	297.409	276.36	304.493	371.402	292.942	330.452
MSMEG_1137	36.3482	-1.48016	0.241008	-6.14154	8.17233e-10	5.82978e-09	-0.185169	0.245308	-0.754841	0.450345	0.598455	61.8652	45.3025	43.1876	40.6614	54.0704	36.6519	16.7755	12.7871	15.8321
MSMEG_1138	26.8818	-1.07161	0.278075	-3.85369	0.00011635	0.000402328	-0.000321159	0.285096	-0.0011265	0.999101	0.999558	26.0485	32.9473	38.7581	26.7203	34.0443	39.4713	9.36307	19.762	14.8215
MSMEG_1139	44.942	-0.415392	0.222075	-1.8705	0.0614142	0.111369	0.210697	0.234334	0.899129	0.368584	0.515672	32.5607	60.7466	43.1876	54.6024	60.0782	50.7488	34.3313	34.874	33.3484
MSMEG_1140	82.5715	-0.244198	0.165255	-1.4777	0.139487	0.220296	-0.21622	0.183979	-1.17524	0.239898	0.376884	110.706	82.3682	85.2678	72.0288	78.1017	84.5814	76.075	77.8853	76.1287
MSMEG_1141	10.725	1.14787	0.343719	3.33955	0.000839151	0.00245906	0.335626	0.370577	0.905685	0.365103	0.511363	4.8841	8.23682	4.4295	8.13228	6.00782	11.2775	15.6051	19.762	18.19
MSMEG_1142	10.4309	0.563954	0.340135	1.65803	0.0973117	0.163555	0.240147	0.363988	0.659768	0.509403	0.651758	4.8841	7.20722	11.0737	9.29403	10.013	11.2775	15.215	12.7871	12.1267
MSMEG_1143	26.6732	0.347928	0.252132	1.37995	0.167603	0.255666	-0.0950866	0.284792	-0.333881	0.738469	0.831279	26.0485	26.7697	21.0401	25.5586	22.0287	19.7357	31.2102	38.3614	29.3062
MSMEG_1144	39.3993	0.408982	0.232177	1.76151	0.0781527	0.136559	-0.313823	0.263713	-1.19002	0.23404	0.370605	35.8167	45.3025	32.1138	32.5291	14.0183	38.0616	49.9364	56.9609	49.8542
MSMEG_1145	30.0922	0.60512	0.256069	2.36311	0.0181223	0.0388082	-0.0672821	0.286532	-0.234816	0.814352	0.885302	24.4205	24.7105	28.7917	31.3674	12.0156	26.7841	47.5956	33.7116	41.4329
MSMEG_1146	32.0411	0.719648	0.26064	2.76108	0.0057611	0.0140656	-0.117339	0.291324	-0.40278	0.68711	0.793935	30.9326	31.9177	16.6106	30.2056	14.0183	23.9647	43.3042	54.636	42.7803
MSMEG_1147	30.046	0.539255	0.254532	2.11862	0.0341228	0.0672224	0.0682451	0.283168	0.241006	0.80955	0.882048	22.7925	28.8289	22.1475	23.2351	26.0339	29.6035	35.1115	49.9861	32.6747
MSMEG_1148	38.5657	0.176358	0.25874	0.681605	0.495489	0.605198	-0.0942773	0.278592	-0.338406	0.735057	0.829369	40.7008	45.3025	28.7917	53.4407	20.0261	28.1938	44.4746	40.6864	45.4751
MSMEG_1149	30.8498	0.364045	0.243477	1.4952	0.134863	0.214436	-0.430434	0.28092	-1.53223	0.125466	0.231227	35.8167	23.6809	34.3286	24.3968	14.0183	23.9647	44.8647	39.5239	37.0538
MSMEG_1150	91.7016	0.339119	0.165028	2.05491	0.0398875	0.0769184	0.264997	0.181225	1.46226	0.14367	0.255872	79.7736	84.4274	71.9793	104.558	90.1174	90.2201	90.5097	106.947	106.782
MSMEG_1151	114.914	-0.682854	0.211399	-3.23017	0.00123718	0.00349754	-0.309234	0.218802	-1.41331	0.157566	0.274883	144.895	141.056	142.851	124.308	132.172	84.5814	69.0527	123.222	72.0865
MSMEG_1152	18.345	-0.208221	0.335898	-0.619894	0.535327	0.640638	0.582917	0.342684	1.70103	0.0889372	0.177012	19.5364	17.5032	8.85899	24.3968	36.0469	18.326	13.2644	19.762	7.41076
MSMEG_1153	32.4669	0.0321606	0.246655	0.130387	0.89626	0.929507	0.161618	0.266783	0.605803	0.544646	0.681883	29.3046	31.9177	31.0065	45.3084	26.0339	31.0132	26.9188	38.3614	32.3379
MSMEG_1154	54.6293	-0.14735	0.242955	-0.606491	0.544189	0.64876	0.0788747	0.254988	0.309327	0.757072	0.84505	52.097	56.6282	55.3687	59.2495	48.0626	66.2554	36.672	75.5604	41.7697
MSMEG_1155	21.3939	0.284511	0.281513	1.01065	0.312184	0.420987	0.111074	0.307333	0.361413	0.71779	0.815792	21.1644	18.5328	17.718	19.7498	22.0287	21.1453	18.336	25.5743	28.2956
MSMEG_1156	24.727	0.420367	0.257823	1.63045	0.103007	0.171451	-0.0817149	0.291635	-0.280196	0.779327	0.861403	17.9084	26.7697	21.0401	22.0733	22.0287	18.326	28.8695	34.874	30.6536
MSMEG_1157	17.8521	0.211157	0.299354	0.705377	0.480575	0.590938	0.378283	0.319308	1.1847	0.236138	0.373208	17.9084	14.4144	13.2885	17.4263	20.0261	25.3744	16.3854	13.9496	21.8954
MSMEG_1158	59.8553	0.508535	0.195438	2.60203	0.00926745	0.0215218	0.457402	0.213768	2.13971	0.032378	0.0778921	48.841	51.4801	38.7581	72.0288	60.0782	62.0263	69.4428	74.3979	61.644
MSMEG_1159	33.2335	0.253243	0.240068	1.05488	0.291481	0.399547	0.416052	0.260063	1.59981	0.109641	0.208613	35.8167	25.7401	22.1475	34.8526	40.0522	39.4713	34.3313	36.0365	30.6536
MSMEG_1160	7.56118	0.318838	0.375694	0.848662	0.396069	0.507543	0.853445	0.383162	2.22738	0.0259222	0.0644376	3.25607	4.11841	5.53687	8.13228	10.013	16.9163	4.68154	6.97481	8.42132
MSMEG_1161	6.2306	0.0861106	0.379986	0.226615	0.820723	0.874639	0.554847	0.387322	1.43252	0.151995	0.267364	1.62803	4.11841	7.75162	9.29403	6.00782	11.2775	6.63218	4.64987	4.71594
MSMEG_1162	11.2112	1.07454	0.346685	3.09949	0.00193857	0.0052717	0.655619	0.367569	1.78366	0.0744785	0.153489	4.8841	4.11841	7.75162	12.7793	8.01043	12.6872	14.4347	22.0869	14.1478
MSMEG_1163	0.804862	0.269414	0.301913	0.892355	0.372202	NA	0.413993	0.280165	1.47767	0.139495	NA	0	0	0	1.16175	2.00261	1.40969	1.17038	1.16247	0.336853
MSMEG_1164	7.41457	1.19382	0.381042	3.13303	0.0017301	0.00475995	1.12594	0.389087	2.8938	0.00380613	0.0125587	0	4.11841	1.10737	8.13228	16.0209	7.04845	12.094	10.4622	7.74761
MSMEG_1165	746.207	0.388703	0.14811	2.62442	0.00867965	0.020272	0.152896	0.15082	1.01376	0.310696	0.453515	672.377	652.768	624.559	731.905	712.929	730.219	704.961	1106.67	779.477
MSMEG_1166	7.09426	0.540097	0.371456	1.454	0.145947	0.227869	-0.232048	0.388198	-0.597756	0.550003	0.68593	6.51213	6.17762	6.64424	9.29403	2.00261	1.40969	10.5335	8.13727	13.1373
MSMEG_1167	64.2598	0.958496	0.198365	4.83198	1.35185e-06	6.35311e-06	0.888302	0.214217	4.14674	3.37244e-05	0.000184949	43.9569	38.0953	35.436	80.161	56.073	87.4008	81.1466	75.5604	80.5078
MSMEG_1168	26.9227	-0.20275	0.25196	-0.804692	0.420997	0.533041	0.0243766	0.274079	0.0889401	0.92913	0.959996	32.5607	26.7697	26.577	27.8821	24.0313	33.8326	27.309	19.762	23.5797
MSMEG_1169	94.1757	0.352723	0.154155	2.2881	0.0221316	0.045956	0.153904	0.173073	0.889244	0.373872	0.521294	86.2857	87.5162	75.3014	92.9403	90.1174	94.4492	103.384	108.11	109.477
MSMEG_1170	10.1317	0.042472	0.340892	0.124591	0.900848	0.932352	-0.0678671	0.363401	-0.186755	0.851852	0.90988	6.51213	11.3256	12.1811	8.13228	6.00782	14.0969	9.36307	12.7871	10.7793
MSMEG_1171	43.6462	-0.324394	0.214094	-1.5152	0.129723	0.207772	0.138186	0.230302	0.600023	0.548491	0.685206	56.9811	42.2137	37.6507	49.9554	48.0626	50.7488	34.3313	39.5239	33.3484
MSMEG_1173	32.2911	0.106995	0.262929	0.406936	0.684055	0.767629	0.270705	0.279743	0.96769	0.333199	0.478706	19.5364	27.7993	37.6507	42.9849	38.0496	26.7841	26.1386	40.6864	30.9904
MSMEG_1174	21.6673	-0.0894813	0.293433	-0.304946	0.760407	0.830293	-0.164393	0.315802	-0.520558	0.602675	0.729338	19.5364	27.7993	21.0401	26.7203	18.0235	14.0969	19.8965	31.3866	16.5058
MSMEG_1175	33.6643	-0.428804	0.236171	-1.81565	0.0694239	0.123508	-0.182779	0.257575	-0.709614	0.477943	0.623528	45.5849	39.1249	33.2212	36.0144	32.0417	32.4229	23.0176	30.2242	31.3273
MSMEG_1176	477.832	0.518931	0.110965	4.67654	2.91762e-06	1.31473e-05	0.541432	0.115661	4.68122	2.85175e-06	1.91908e-05	335.375	352.124	406.406	536.73	538.702	535.682	490.781	594.021	510.669
MSMEG_1177	183.992	-0.0895167	0.127903	-0.699879	0.484003	0.594373	-0.153685	0.140267	-1.09566	0.273229	0.413526	208.388	200.773	174.965	183.557	166.216	169.163	172.437	204.594	175.837
MSMEG_1178	2338.19	0.374254	0.109112	3.43001	0.000603559	0.00181982	-0.189763	0.110757	-1.71332	0.0866534	0.173465	2523.45	2033.47	2075.22	1994.73	1684.19	2103.26	2885.78	2881.76	2861.9
MSMEG_1180	1511.13	0.388613	0.113997	3.40898	0.000652072	0.00195532	-0.222008	0.116482	-1.90594	0.0566577	0.123299	1492.91	1426	1373.14	1346.47	1003.31	1302.55	1793.42	2049.43	1812.94
MSMEG_1184	900.31	0.0978739	0.093596	1.04571	0.295696	0.404145	0.0936697	0.0969686	0.965979	0.334055	0.47962	941.003	864.866	777.377	936.374	903.176	910.66	877.008	991.585	900.744
MSMEG_1185	129.989	-0.42143	0.138362	-3.04585	0.00232025	0.006233	0.0387529	0.148989	0.260106	0.794782	0.871449	151.407	134.878	137.314	130.116	156.203	150.837	105.725	97.6473	105.772
MSMEG_1186	11.0198	0.112532	0.350982	0.320622	0.748497	0.820836	0.739546	0.360746	2.05005	0.04036	0.0934009	8.14016	7.20722	8.85899	20.9116	14.0183	14.0969	12.8742	4.64987	8.42132
MSMEG_1187	16.9618	0.528282	0.316324	1.67007	0.0949064	0.160209	0.370193	0.336985	1.09854	0.271968	0.412281	16.2803	9.26642	13.2885	16.2646	28.0365	11.2775	23.4077	13.9496	20.8849
MSMEG_1188	1582.3	0.141986	0.0849775	1.67086	0.0947489	0.160149	0.0772418	0.0872152	0.885646	0.375808	0.523228	1667.11	1412.61	1436.26	1604.38	1509.97	1636.65	1713.05	1618.16	1642.49
MSMEG_1189	313.308	-0.169924	0.12733	-1.33451	0.182036	0.273491	-0.304103	0.135258	-2.24832	0.024556	0.061646	332.119	321.236	397.547	279.983	264.344	300.264	342.142	268.53	313.61
MSMEG_1190	113.758	-0.177806	0.153092	-1.16143	0.245466	0.348769	0.359976	0.162335	2.2175	0.0265893	0.0657972	96.0539	112.227	109.63	126.631	148.193	143.788	86.2183	108.11	92.9713
MSMEG_1191	36.0689	0.723006	0.235519	3.06984	0.00214176	0.00578591	-0.323067	0.273827	-1.17982	0.23807	0.37526	42.3288	31.9177	21.0401	25.5586	22.0287	22.555	52.2772	49.9861	56.9281
MSMEG_1192	6.29148	0.197627	0.378463	0.522184	0.601542	0.699492	0.369985	0.388104	0.953313	0.340431	0.486014	6.51213	5.14801	3.32212	10.4558	6.00782	5.63876	7.02231	8.13727	4.37908
MSMEG_1193	824.384	0.762517	0.135489	5.62789	1.82429e-08	1.09357e-07	0.738275	0.137637	5.36394	8.14242e-08	7.02966e-07	568.183	554.956	558.117	965.418	907.182	976.915	1156.34	764.904	967.441
MSMEG_1194	105.524	-0.363803	0.201044	-1.80957	0.0703628	0.124672	-0.642627	0.215407	-2.98331	0.00285148	0.009788	140.011	118.404	143.959	83.6463	88.1148	76.1232	133.034	69.7481	96.6767
MSMEG_1195	322.766	-0.938716	0.146699	-6.39891	1.56488e-10	1.23129e-09	-0.487166	0.151152	-3.22301	0.0012685	0.00482574	393.984	421.108	499.426	296.247	306.399	325.638	262.556	175.533	224.007
MSMEG_1196	182.223	0.197058	0.137301	1.43522	0.151224	0.234905	0.353303	0.146209	2.41642	0.0156739	0.0422213	153.035	178.121	143.959	211.439	230.3	176.211	179.069	175.533	192.343
MSMEG_1197	4.33199	0.0710071	0.388541	0.182753	0.854992	0.899055	0.0753298	0.392755	0.191799	0.8479	0.906985	3.25607	4.11841	4.4295	2.32351	6.00782	5.63876	3.51115	4.64987	5.05279
MSMEG_1198	76.0053	0.704947	0.180753	3.90006	9.61708e-05	0.000337703	0.502746	0.198398	2.53403	0.0112759	0.0317543	45.5849	67.9538	49.8318	77.8375	88.1148	77.5329	96.3616	87.1851	93.645
MSMEG_1199	404.096	0.902421	0.0943664	9.56294	1.14455e-21	2.5841e-20	0.683597	0.101941	6.70582	2.00272e-11	2.8604e-10	278.394	256.371	273.521	441.467	426.556	435.594	499.754	521.948	503.258
MSMEG_1200	67.1015	-0.173611	0.1939	-0.895364	0.370593	0.482865	0.399063	0.204509	1.95133	0.0510183	0.113087	65.1213	59.717	62.0129	80.161	92.12	80.3523	63.981	54.636	45.812
MSMEG_1201	18.9544	0.191905	0.290268	0.661129	0.50853	0.617026	0.434652	0.310497	1.39986	0.161555	0.27966	17.9084	12.3552	16.6106	22.0733	26.0339	19.7357	19.1163	20.9244	15.8321
MSMEG_1202	1.6425	0.41501	0.354027	1.17225	0.241095	NA	0.481156	0.336335	1.43059	0.152549	NA	0	0	1.10737	3.48526	2.00261	1.40969	0.780256	4.64987	1.34741
MSMEG_1203	36.5986	-0.117769	0.236556	-0.497849	0.61859	0.713382	0.308558	0.252106	1.22392	0.220983	0.355674	34.1887	36.0361	33.2212	44.1467	44.0574	43.7004	25.7485	30.2242	38.0644
MSMEG_1204	208.774	0.405646	0.1211	3.34969	0.000809034	0.00238036	0.241646	0.132493	1.82384	0.0681755	0.143012	179.084	164.736	188.254	202.145	208.271	221.321	224.324	258.068	232.765
MSMEG_1205	152.513	0.0074481	0.212555	0.0350408	0.972047	0.981458	1.20397	0.213282	5.64496	1.65224e-08	1.57779e-07	96.0539	102.96	104.093	230.027	306.399	218.502	75.2947	145.308	93.9819
MSMEG_1206	195.717	-0.178976	0.163463	-1.0949	0.27356	0.379829	0.992538	0.164625	6.02909	1.64885e-09	1.80249e-08	131.871	158.559	153.925	271.85	348.454	303.083	107.285	134.846	151.584
MSMEG_1207	601.402	-0.321438	0.182819	-1.75823	0.0787078	0.137274	1.83402	0.181274	10.1174	4.62412e-24	2.2504e-22	247.461	366.539	342.179	1122.25	1461.9	1106.61	199.355	315.029	251.292
MSMEG_1208	155.807	-0.151251	0.204028	-0.741326	0.458496	0.569006	2.52712	0.196049	12.8903	5.10553e-38	6.98819e-36	55.3531	46.3321	65.3351	306.703	386.503	386.255	38.6227	63.9357	53.2227
MSMEG_1209	62.6258	0.0387104	0.204549	0.189248	0.849899	0.89585	1.28439	0.207229	6.19791	5.72168e-10	6.76402e-09	43.9569	31.9177	46.5097	96.4256	106.138	114.185	43.6943	38.3614	42.4434
MSMEG_1210	224.521	0.298862	0.118246	2.52745	0.0114893	0.0260922	0.280195	0.128114	2.18707	0.0287374	0.0704232	200.248	210.039	176.072	255.586	216.282	238.238	238.368	240.631	245.229
MSMEG_1211	671.078	-0.287125	0.0948313	-3.02775	0.00246382	0.00657486	0.463939	0.0968461	4.79048	1.66385e-06	1.17796e-05	577.952	674.39	624.559	835.301	901.174	878.237	485.319	556.822	505.953
MSMEG_1212	40.3192	-0.582764	0.234364	-2.48658	0.0128978	0.0289151	0.103474	0.24642	0.419907	0.674553	0.785226	52.097	45.3025	35.436	47.6319	64.0835	33.8326	28.4793	29.0617	26.9482
MSMEG_1213	89.0151	-0.0488136	0.173285	-0.281696	0.778177	0.843946	-0.131574	0.190134	-0.692006	0.488934	0.63341	97.682	82.3682	100.771	88.2933	76.0991	87.4008	104.164	84.8601	79.4972
MSMEG_1214	89.1227	-0.461492	0.192572	-2.39647	0.016554	0.0357997	0.0161559	0.201952	0.0799986	0.936238	0.964354	99.31	110.167	85.2678	77.8375	118.154	107.136	76.4651	52.311	75.455
MSMEG_1215	1484.74	2.17478	0.0807328	26.938	7.88827e-160	2.5913e-156	1.6757	0.0834033	20.0916	8.74839e-90	9.57949e-87	547.019	482.884	489.459	1715.91	1618.11	1563.35	2278.74	2330.75	2336.41
MSMEG_1216	53.2326	0.531402	0.213049	2.49427	0.0126216	0.0283695	0.38846	0.23216	1.67324	0.0942794	0.1849	42.3288	39.1249	42.0802	58.0877	52.0678	54.9779	52.2772	80.2103	57.9387
MSMEG_1217	15.767	-0.31661	0.309009	-1.0246	0.305554	0.414171	0.210016	0.325436	0.645337	0.518709	0.660321	13.0243	15.444	17.718	13.9411	28.0365	16.9163	12.094	13.9496	10.7793
MSMEG_1218	26.8674	-0.0601487	0.288974	-0.208146	0.835115	0.886247	0.476828	0.30048	1.58689	0.112538	0.21283	19.5364	22.6513	25.4696	26.7203	52.0678	26.7841	21.8472	30.2242	16.5058
MSMEG_1219	21.6855	-0.220175	0.282119	-0.780435	0.435135	0.546518	0.112134	0.301153	0.372349	0.709633	0.810833	26.0485	23.6809	16.6106	24.3968	20.0261	26.7841	18.7261	24.4118	14.4847
MSMEG_1220	73.0202	-0.4933	0.199193	-2.47649	0.0132681	0.0296098	-0.0504473	0.210773	-0.239344	0.810839	0.882865	99.31	73.1018	74.1941	58.0877	90.1174	90.2201	52.6673	66.2607	53.2227
MSMEG_1221	18.809	0.76815	0.302518	2.53918	0.0111111	0.0253472	0.584193	0.32492	1.79796	0.072184	0.149464	9.7682	14.4144	11.0737	16.2646	32.0417	15.5066	24.5781	24.4118	21.2217
MSMEG_1222	183.286	-0.164888	0.144101	-1.14425	0.252519	0.356086	-0.0520783	0.153498	-0.339278	0.7344	0.829259	185.596	202.832	184.931	167.293	194.253	194.537	151.37	208.082	160.679
MSMEG_1223	45.4279	-0.782657	0.224483	-3.48649	0.000489402	0.00151723	-0.0336956	0.235684	-0.142969	0.886315	0.934685	68.3774	52.5097	42.0802	58.0877	44.0574	52.1585	25.7485	37.199	28.6325
MSMEG_1224	1.88977	0.109483	0.373582	0.293064	0.769473	0.836855	0.396637	0.360202	1.10115	0.27083	0.411368	0	2.05921	1.10737	2.32351	2.00261	4.22907	1.95064	2.32494	1.01056
MSMEG_1225	218.645	-0.830791	0.189307	-4.3886	1.14085e-05	4.69047e-05	-0.746342	0.195931	-3.80921	0.000139411	0.000675965	323.978	286.23	314.494	174.263	212.276	148.017	125.231	226.681	156.636
MSMEG_1226	122.841	1.22018	0.156397	7.80184	6.10133e-15	7.70879e-14	0.666851	0.172505	3.86569	0.000110777	0.000549701	73.2615	64.865	81.9457	116.175	118.154	124.053	192.723	161.583	172.805
MSMEG_1227	22.614	0.643774	0.268423	2.39835	0.0164689	0.035651	-0.0170169	0.303493	-0.0560701	0.955286	0.974418	14.6523	21.6217	18.8254	17.4263	18.0235	19.7357	34.7214	30.2242	28.2956
MSMEG_1228	28.9179	0.0710764	0.262449	0.27082	0.786529	0.850757	-0.0860404	0.286624	-0.300185	0.764036	0.850511	30.9326	24.7105	31.0065	29.0439	18.0235	31.0132	26.9188	43.0113	25.6008
MSMEG_1230	0.340716	0.0776681	0.220937	0.35154	0.725183	NA	0.0995675	0.213847	0.465601	0.641501	NA	0	0	0	0	2.00261	0	0.390128	0	0.673705
MSMEG_1231	0.172511	0.0325408	0.153738	0.211665	0.832369	NA	0	0.152014	0	1	NA	0	0	0	0	0	0	0.390128	1.16247	0
MSMEG_1232	3.14208	0.236619	0.384489	0.615412	0.538283	0.643354	1.07818	0.381093	2.82918	0.00466676	0.0149273	0	0	2.21475	5.80877	10.013	4.22907	2.34077	2.32494	1.34741
MSMEG_1233	2.26824	0.191882	0.389132	0.493103	0.62194	0.716491	-0.539558	0.368875	-1.46271	0.143546	0.255789	3.25607	2.05921	3.32212	0	0	1.40969	3.51115	3.4874	3.36853
MSMEG_1234	2.8105	0.411988	0.388955	1.05922	0.2895	0.397539	0.380519	0.381371	0.997765	0.318393	0.461373	1.62803	2.05921	1.10737	3.48526	4.00522	2.81938	4.68154	3.4874	2.02112
MSMEG_1235	11.2214	0.761292	0.345002	2.20663	0.0273397	0.0554036	0.52282	0.364653	1.43375	0.151645	0.267106	11.3962	4.11841	6.64424	12.7793	12.0156	11.2775	18.336	11.6247	12.8004
MSMEG_1236	193.611	-0.399854	0.179429	-2.22848	0.0258488	0.0526594	-0.413733	0.187255	-2.20946	0.0271428	0.0670154	291.418	206.95	202.649	162.646	178.232	173.392	159.172	223.194	144.847
MSMEG_1237	52.8882	-0.0743225	0.210539	-0.353011	0.72408	0.801012	-0.278423	0.233448	-1.19265	0.233005	0.369411	65.1213	51.4801	55.3687	51.1172	48.0626	38.0616	48.3759	70.9105	47.4962
MSMEG_1238	1856.04	-0.264223	0.140047	-1.88667	0.0592045	0.107689	0.35656	0.140579	2.53637	0.0112008	0.0315834	1930.85	1726.64	1695.39	2119.04	2713.53	2083.52	1227.34	1718.13	1489.9
MSMEG_1239	3.08341	-0.266115	0.39069	-0.681143	0.495781	0.605443	-0.156493	0.383269	-0.408312	0.683045	0.791229	6.51213	4.11841	1.10737	4.64702	4.00522	0	2.34077	2.32494	2.69482
MSMEG_1240	343.268	-0.383782	0.153883	-2.49398	0.0126321	0.0283833	1.04747	0.153576	6.82052	9.07102e-12	1.34834e-10	249.089	276.963	263.555	529.76	644.84	514.537	170.486	254.58	185.606
MSMEG_1241	61.0233	-0.315607	0.227663	-1.38629	0.165659	0.253407	0.835173	0.230611	3.62156	0.000292833	0.00131595	52.097	58.6874	37.6507	89.4551	118.154	76.1232	32.3806	39.5239	45.1383
MSMEG_1243	1874.42	-0.93518	0.143226	-6.52939	6.60388e-11	5.44385e-10	-0.198302	0.143723	-1.37975	0.167665	0.287614	2510.43	2356.76	2220.29	1997.06	2373.09	1781.85	997.557	1453.08	1179.66
MSMEG_1244	5395.05	-0.942717	0.113176	-8.32968	8.10617e-17	1.20765e-15	-0.170733	0.11339	-1.50572	0.132139	0.240742	7034.73	6741.84	6457.1	6046.93	6354.28	5530.21	2979.8	4032.6	3377.96
MSMEG_1245	1773.41	-0.817512	0.109327	-7.47767	7.56493e-14	8.7349e-13	-0.359132	0.110431	-3.25211	0.00114553	0.00440383	2469.73	2165.25	2191.49	1740.31	1860.42	1694.45	1122.79	1468.2	1248.04
MSMEG_1246	2418.68	-1.01884	0.11052	-9.21853	3.01198e-20	6.07015e-19	-0.210669	0.110993	-1.89804	0.0576903	0.125256	3262.58	3110.43	2892.46	2569.8	2939.83	2478.23	1313.56	1686.74	1514.49
MSMEG_1247	1126.08	-0.438776	0.127282	-3.44728	0.000566268	0.00172701	0.0769638	0.128493	0.598974	0.54919	0.685575	1282.89	1194.34	1153.88	1301.16	1421.85	1115.06	775.965	1042.73	846.848
MSMEG_1248	531.428	-0.124515	0.122983	-1.01246	0.311319	0.420511	0.13026	0.126395	1.03058	0.302737	0.445162	516.086	555.985	509.392	529.76	706.921	511.717	468.934	513.811	470.246
MSMEG_1249	117.805	-0.367	0.179115	-2.04897	0.0404651	0.0779178	-0.299062	0.19081	-1.56733	0.117038	0.219133	118.846	135.908	155.032	128.955	108.141	91.6298	90.5097	132.521	98.6978
MSMEG_1250	40.163	-0.695584	0.220882	-3.14912	0.00163761	0.00452632	-0.704958	0.248139	-2.84098	0.00449746	0.0144916	58.6092	56.6282	49.8318	24.3968	36.0469	36.6519	26.9188	38.3614	34.0221
MSMEG_1251	89.2832	0.871919	0.175086	4.97995	6.36009e-07	3.13943e-06	0.0442667	0.198586	0.22291	0.823606	0.891448	63.4933	75.161	64.2277	80.161	70.0913	59.207	121.33	149.958	119.92
MSMEG_1252	2632.28	0.574204	0.0865297	6.63592	3.22485e-11	2.79885e-10	0.48123	0.0877783	5.48234	4.19745e-08	3.80375e-07	2192.96	2032.44	1853.74	2835.84	2993.9	2688.28	2908.01	3196.79	2988.56
MSMEG_1253	664.725	0.338596	0.0974515	3.47451	0.000511794	0.00157641	0.751531	0.10021	7.49954	6.40403e-14	1.2673e-12	540.507	505.535	462.882	860.86	869.132	826.078	585.192	681.206	651.136
MSMEG_1254	3551.84	0.178265	0.127191	1.40155	0.161049	0.247913	0.584529	0.127575	4.58183	4.60924e-06	2.98646e-05	3062.33	2943.63	2744.07	4425.12	4804.26	4041.58	2790.98	3958.2	3196.4
MSMEG_1255	1851.19	0.202373	0.113724	1.77951	0.0751562	0.132061	0.529422	0.114648	4.6178	3.87835e-06	2.55063e-05	1556.4	1574.26	1480.56	2182.94	2465.21	2068.01	1535.54	2029.67	1768.14
MSMEG_1256	349.005	0.208103	0.160265	1.2985	0.194116	0.288017	0.45462	0.163735	2.77656	0.00549379	0.0171959	310.954	299.614	271.307	443.79	412.537	367.929	274.26	435.925	324.726
MSMEG_1257	15.9597	-0.905469	0.313272	-2.89036	0.00384801	0.00977249	0.3805	0.317614	1.19799	0.230919	0.366724	22.7925	13.3848	15.5032	25.5586	24.0313	19.7357	8.58282	6.97481	7.07391
MSMEG_1258	12.1186	1.00187	0.351456	2.85064	0.00436316	0.0109579	0.539065	0.368953	1.46107	0.143998	0.256316	8.14016	6.17762	6.64424	13.9411	8.01043	14.0969	20.6768	8.13727	23.2428
MSMEG_1259	5.9761	-0.304958	0.386552	-0.788919	0.430159	0.542134	0.606664	0.389686	1.5568	0.119517	0.223202	4.8841	4.11841	5.53687	8.13228	12.0156	9.86783	2.34077	1.16247	5.7265
MSMEG_1260	615.7	1.35845	0.126217	10.7628	5.15905e-27	1.63744e-25	0.897056	0.130306	6.88425	5.8093e-12	8.85548e-11	348.399	352.124	300.098	620.377	636.829	639.999	796.642	1040.41	806.425
MSMEG_1261	264.96	0.509845	0.124101	4.10831	3.98572e-05	0.000150236	0.259892	0.133302	1.94965	0.0512175	0.113338	223.04	237.838	191.576	249.777	266.347	270.66	290.645	349.903	304.852
MSMEG_1262	56.4589	0.786988	0.22163	3.55091	0.000383898	0.00121552	0.479045	0.239889	1.99695	0.0458311	0.103546	42.3288	37.0657	38.7581	61.573	56.073	52.1585	56.9587	94.1599	69.0548
MSMEG_1263	154.837	0.525507	0.148831	3.5309	0.000414152	0.00130191	1.10175	0.154707	7.12154	1.06726e-12	1.80254e-11	86.2857	102.96	105.201	207.954	260.339	197.357	150.589	138.334	144.51
MSMEG_1264	144.262	-0.0870669	0.200767	-0.433672	0.664526	0.751194	-0.200647	0.209577	-0.957393	0.338369	0.484332	154.663	134.878	171.643	145.219	146.19	105.727	115.088	197.62	127.33
MSMEG_1265	691.705	1.6446	0.0978831	16.8017	2.37264e-63	6.23531e-61	0.877231	0.103678	8.46112	2.6482e-17	7.43534e-16	363.051	345.947	321.138	633.156	670.874	608.986	1053.74	1184.55	1043.91
MSMEG_1266	24.5508	-0.787391	0.251318	-3.13305	0.00172999	0.00475995	-0.502077	0.27786	-1.80694	0.0707711	0.147081	30.9326	33.9769	34.3286	20.9116	24.0313	22.555	19.1163	18.5995	16.5058
MSMEG_1267	199.973	-0.42359	0.134315	-3.1537	0.00161212	0.0044634	-0.635708	0.147442	-4.31159	1.62088e-05	9.4838e-05	266.997	226.513	266.877	151.028	184.24	149.427	207.548	166.233	180.89
MSMEG_1268	233.11	-0.207659	0.114626	-1.81162	0.0700445	0.124242	-0.429555	0.127525	-3.36841	0.000756034	0.00305859	258.857	283.141	265.77	225.38	180.235	184.669	226.664	237.143	236.134
MSMEG_1269	131.772	-0.657461	0.145889	-4.50657	6.58838e-06	2.79623e-05	-0.49075	0.15977	-3.0716	0.00212914	0.0076565	200.248	156.5	153.925	112.69	120.156	122.643	99.4827	118.572	101.73
MSMEG_1270	43.4211	-1.22487	0.220158	-5.56359	2.64282e-08	1.55307e-07	-0.425399	0.233145	-1.82461	0.0680598	0.14286	76.5175	53.5393	55.3687	46.4702	52.0678	35.2422	23.4077	23.2494	24.9271
MSMEG_1271	31.4413	-1.03138	0.244756	-4.21389	2.51007e-05	9.79867e-05	-0.0265851	0.254375	-0.104512	0.916763	0.952124	42.3288	41.1841	34.3286	45.3084	38.0496	31.0132	17.9459	13.9496	18.8638
MSMEG_1272	328.969	-0.378465	0.142607	-2.6539	0.00795668	0.0187636	0.149103	0.146146	1.02023	0.307617	0.450422	333.747	348.006	347.715	332.262	450.587	372.158	286.744	209.244	280.261
MSMEG_1273	20.7108	-0.303608	0.278346	-1.09076	0.275379	0.381777	-0.285339	0.305026	-0.935455	0.349554	0.495057	29.3046	22.6513	21.0401	15.1028	14.0183	26.7841	17.5558	22.0869	17.8532
MSMEG_1274	26.9429	0.663024	0.277198	2.39188	0.0167623	0.0362146	0.173799	0.302863	0.573854	0.566066	0.699334	21.1644	23.6809	16.6106	26.7203	28.0365	16.9163	28.8695	48.8236	31.6642
MSMEG_1275	76.7951	0.668735	0.181049	3.69366	0.000221049	0.000728331	0.0401774	0.204507	0.19646	0.84425	0.904198	60.2372	54.5689	73.0867	70.867	64.0835	57.7973	91.6801	115.084	103.751
MSMEG_1276	3.01978	-0.610254	0.389834	-1.56542	0.117484	0.1912	-0.0416184	0.384421	-0.108263	0.913787	0.949993	3.25607	4.11841	4.4295	3.48526	2.00261	5.63876	0.390128	1.16247	2.69482
MSMEG_1277	35.5542	-0.300825	0.289304	-1.03982	0.298423	0.406771	-0.49425	0.305856	-1.61596	0.106104	0.203474	16.2803	63.8354	49.8318	30.2056	26.0339	31.0132	36.672	29.0617	37.0538
MSMEG_1278	150.449	-0.986136	0.156995	-6.28134	3.35677e-10	2.54371e-09	-0.836242	0.169268	-4.94034	7.7988e-07	5.74418e-06	187.224	234.749	240.3	125.469	140.183	100.088	122.89	105.785	97.3504
MSMEG_1279	530.592	-0.711629	0.0983912	-7.23265	4.73673e-13	5.03565e-12	-0.521039	0.103912	-5.01422	5.32489e-07	4.01659e-06	698.426	716.603	659.995	476.319	544.709	424.317	427.58	410.351	417.024
MSMEG_1280	224.484	-0.513489	0.112027	-4.58363	4.56976e-06	1.99623e-05	-0.292247	0.122334	-2.38892	0.0168981	0.0451854	275.138	271.815	258.018	212.601	234.305	210.044	176.728	185.995	195.711
MSMEG_1281	1127.3	-0.518875	0.0928891	-5.58596	2.32413e-08	1.37563e-07	0.0109251	0.0946578	0.115417	0.908115	0.946611	1317.08	1283.91	1150.56	1227.97	1377.79	1179.91	824.731	916.025	867.733
MSMEG_1282	217.323	-0.572008	0.116194	-4.92289	8.52763e-07	4.12263e-06	0.30268	0.120822	2.50517	0.0122393	0.0340874	208.388	222.394	241.408	271.85	276.36	288.986	152.93	140.659	152.931
MSMEG_1283	120.909	-0.12224	0.180892	-0.675761	0.499192	0.608929	-0.00804495	0.191102	-0.0420977	0.966421	0.980903	130.243	120.464	121.811	123.146	104.136	139.559	95.9715	151.121	101.73
MSMEG_1284	196.244	-0.171983	0.117399	-1.46495	0.142936	0.224608	-0.150638	0.129609	-1.16225	0.245133	0.383824	224.668	193.565	217.045	194.013	190.248	183.26	182.19	197.62	183.585
MSMEG_1285	1461.31	0.101341	0.0777858	1.30282	0.192637	0.286017	-0.0268185	0.080623	-0.332641	0.739405	0.832116	1444.06	1436.3	1420.76	1441.74	1397.82	1378.68	1466.1	1679.77	1486.53
MSMEG_1286	128.675	0.86236	0.143884	5.99345	2.05441e-09	1.40016e-08	0.288376	0.162045	1.7796	0.0751415	0.154613	107.45	86.4866	93.0194	124.308	100.13	121.233	179.069	170.883	175.5
MSMEG_1287	19.7472	1.48653	0.305968	4.85845	1.1831e-06	5.59607e-06	0.477532	0.336542	1.41894	0.155917	0.272876	8.14016	7.20722	13.2885	17.4263	8.01043	18.326	33.1609	41.8488	30.3167
MSMEG_1288	119.578	0.555802	0.187079	2.97094	0.00296886	0.00771881	0.623263	0.196007	3.17979	0.0014738	0.00551103	68.3774	89.5754	101.878	132.44	110.143	171.982	119.379	155.771	126.657
MSMEG_1289	15.6675	0.379581	0.321851	1.17937	0.238251	0.340256	-0.0746234	0.346329	-0.21547	0.829401	0.894773	19.5364	11.3256	13.2885	13.9411	6.00782	18.326	26.1386	16.2745	16.1689
MSMEG_1291	307.048	1.37587	0.129879	10.5935	3.19441e-26	9.58322e-25	0.50551	0.14006	3.60925	0.000307089	0.00137531	141.639	215.187	178.287	268.365	266.347	245.286	466.203	496.374	485.742
MSMEG_1292	92.7468	0.829916	0.161929	5.12519	2.97239e-07	1.52806e-06	0.49531	0.180274	2.74754	0.00600433	0.0185902	68.3774	58.6874	69.7646	90.6168	98.1278	94.4492	123.671	110.434	120.593
MSMEG_1293	64.2573	0.246633	0.195024	1.26463	0.206005	0.302447	-0.0371486	0.216253	-0.171783	0.863608	0.918108	70.0054	47.3617	66.4424	65.0582	46.06	62.0263	68.2724	83.6977	69.3917
MSMEG_1294	159.148	0.291796	0.161057	1.81175	0.0700246	0.12424	0.763224	0.167024	4.56955	4.88777e-06	3.15218e-05	115.59	114.286	126.241	185.881	250.326	191.718	147.078	173.208	128.004
MSMEG_1295	187.263	0.79818	0.159797	4.99497	5.88454e-07	2.93557e-06	0.539228	0.168878	3.19301	0.00140798	0.00528898	133.499	112.227	147.281	178.91	204.266	200.176	211.84	285.967	211.207
MSMEG_1296	673.767	0.411327	0.138401	2.97199	0.00295879	0.00769567	0.483992	0.140894	3.43516	0.000592213	0.00247982	569.811	510.683	531.54	795.802	748.975	731.629	635.909	903.237	636.315
MSMEG_1297	497.775	0.915054	0.117346	7.79792	6.29355e-15	7.93639e-14	0.565633	0.122697	4.60998	4.02705e-06	2.64313e-05	361.423	333.591	321.138	535.569	482.629	493.391	592.214	748.629	611.388
MSMEG_1298	440.538	0.705933	0.109981	6.41866	1.3748e-10	1.0922e-09	0.889956	0.114282	7.78738	6.84154e-15	1.49332e-13	262.113	296.526	315.602	570.421	516.673	559.647	461.522	456.85	525.49
MSMEG_1299	171.502	0.47165	0.132163	3.56871	0.000358746	0.00114083	0.874264	0.139731	6.25675	3.9309e-10	4.74743e-09	105.822	124.582	127.348	219.572	242.316	217.092	161.903	169.72	175.163
MSMEG_1300	17.1726	0.266714	0.313968	0.849495	0.395606	0.507049	0.884071	0.325721	2.7142	0.00664363	0.0202171	6.51213	15.444	11.0737	18.5881	32.0417	26.7841	13.6545	13.9496	16.5058
MSMEG_1301	9.16163	0.976919	0.358341	2.72623	0.00640623	0.0154398	0.293749	0.379352	0.774345	0.438727	0.585742	1.62803	7.20722	6.64424	8.13228	8.01043	7.04845	17.5558	15.1121	11.1161
MSMEG_1302	4.07256	0.473354	0.390672	1.21164	0.22565	0.325328	0.230477	0.391579	0.588583	0.556141	0.691492	1.62803	4.11841	2.21475	1.16175	6.00782	5.63876	4.68154	5.81234	5.38964
MSMEG_1303	120.768	-0.616242	0.198451	-3.10525	0.00190116	0.00518067	-0.866325	0.21207	-4.08509	4.40588e-05	0.000236106	196.992	172.973	137.314	70.867	104.136	91.6298	127.962	75.5604	109.477
MSMEG_1304	29.8379	0.64799	0.295762	2.19092	0.0284576	0.0574046	0.929326	0.306744	3.02965	0.0024484	0.00860672	6.51213	23.6809	21.0401	41.8232	54.0704	25.3744	27.6991	38.3614	29.9799
MSMEG_1305	94.992	1.04463	0.171774	6.08141	1.19132e-09	8.33544e-09	0.28168	0.193199	1.45798	0.144846	0.257548	65.1213	70.013	58.6908	83.6463	82.1069	73.3039	132.644	162.745	126.657
MSMEG_1306	18.2219	0.203064	0.335535	0.605195	0.54505	0.649551	0.534487	0.346022	1.54466	0.122428	0.227129	16.2803	21.6217	4.4295	20.9116	32.0417	18.326	15.215	13.9496	21.2217
MSMEG_1307	2.25296	-0.0666892	0.371364	-0.179579	0.857483	0.900924	0.28968	0.361316	0.801735	0.422706	0.571032	0	1.0296	4.4295	6.97053	0	2.81938	1.17038	1.16247	2.69482
MSMEG_1308	10.8863	0.0266316	0.335711	0.0793288	0.936771	0.95783	-0.151362	0.360173	-0.420249	0.674304	0.785075	9.7682	9.26642	14.3959	9.29403	8.01043	11.2775	12.094	15.1121	8.75817
MSMEG_1309	1.52398	0.178053	0.350387	0.508161	0.611341	NA	0.64024	0.335876	1.90618	0.0566268	NA	0	1.0296	0	1.16175	4.00522	4.22907	0.780256	1.16247	1.34741
MSMEG_1310	0.243563	-0.0389721	0.172955	-0.22533	0.821722	NA	-0.0340172	0.170311	-0.199736	0.841687	NA	0	1.0296	0	0	0	0	0	1.16247	0
MSMEG_1311	657.887	-0.447337	0.0859917	-5.2021	1.97047e-07	1.03651e-06	-0.313668	0.0910544	-3.44485	0.000571383	0.00240178	800.992	770.143	771.84	635.48	586.764	649.867	545.399	554.497	605.998
MSMEG_1312	37.5371	0.506335	0.27222	1.86002	0.0628828	0.113625	0.0377819	0.292315	0.129251	0.897159	0.941437	30.9326	36.0361	26.577	29.0439	36.0469	32.4229	41.3536	72.073	33.3484
MSMEG_1313	236.625	-0.152758	0.116917	-1.30655	0.191365	0.284397	0.0138257	0.12584	0.109867	0.912515	0.949212	242.577	227.542	262.448	269.527	238.31	228.37	209.889	231.331	219.628
MSMEG_1314	60.9343	-0.742553	0.194093	-3.82577	0.000130365	0.000446058	0.106211	0.203251	0.522558	0.601282	0.728457	60.2372	75.161	69.7646	88.2933	72.0939	62.0263	37.0622	43.0113	40.7592
MSMEG_1315	2608.69	0.244371	0.112395	2.17422	0.0296889	0.0595772	0.119113	0.113424	1.05016	0.293645	0.436016	2432.28	2261.01	2468.34	2682.49	2547.32	2558.59	2522.96	3369.99	2635.2
MSMEG_1317	229.828	-0.328639	0.111919	-2.93641	0.00332038	0.00853811	-0.454166	0.124818	-3.63862	0.000274107	0.00124199	288.162	269.756	265.77	190.528	218.284	190.308	228.615	201.107	215.923
MSMEG_1318	31.3132	0.0469529	0.238237	0.197085	0.843761	0.892388	-0.132322	0.266386	-0.496731	0.619379	0.742035	35.8167	31.9177	28.7917	32.5291	20.0261	31.0132	31.2102	39.5239	30.9904
MSMEG_1319	16.7367	0.423809	0.304157	1.39339	0.163501	0.251029	0.440811	0.326257	1.35112	0.176658	0.299366	17.9084	10.296	11.0737	17.4263	14.0183	23.9647	17.1656	20.9244	17.8532
MSMEG_1320	10.3928	-0.366085	0.364287	-1.00494	0.314928	0.424078	0.124705	0.373599	0.333794	0.738535	0.831279	14.6523	10.296	7.75162	3.48526	18.0235	16.9163	5.85192	8.13727	8.42132
MSMEG_1321	32.0712	-0.896284	0.247726	-3.61804	0.000296841	0.000955066	-0.140852	0.261015	-0.53963	0.589452	0.720234	39.0728	35.0065	45.4023	34.8526	50.0652	25.3744	21.0669	18.5995	19.2006
MSMEG_1322	1798.09	-1.13083	0.10573	-10.6955	1.06865e-26	3.28086e-25	-0.404035	0.106553	-3.79187	0.000149516	0.000721232	2525.08	2458.69	2359.81	1911.09	1946.54	1664.84	1001.85	1265.93	1048.96
MSMEG_1323	108.918	-1.19191	0.162867	-7.31835	2.51039e-13	2.76269e-12	-0.263957	0.169268	-1.5594	0.118901	0.222304	138.383	164.736	135.1	132.44	120.156	109.956	67.4922	47.6612	64.3389
MSMEG_1324	12.4127	-0.697931	0.33843	-2.06226	0.0391832	0.0757603	-0.513288	0.357093	-1.43741	0.150602	0.265697	14.6523	10.296	26.577	12.7793	12.0156	7.04845	8.97295	11.6247	7.74761
MSMEG_1326	2.30764	-0.548019	0.375296	-1.46023	0.144227	0.226083	-0.0210694	0.36457	-0.0577926	0.953914	0.974022	4.8841	0	4.4295	2.32351	2.00261	4.22907	0.390128	1.16247	1.34741
MSMEG_1329	80.9462	0.521999	0.16698	3.12611	0.00177132	0.004849	0.136521	0.188565	0.723996	0.469068	0.615986	65.1213	73.1018	66.4424	81.3228	62.0809	80.3523	104.944	98.8098	96.3399
MSMEG_1330	166.853	0.335257	0.138593	2.419	0.0155632	0.0339026	0.195177	0.150484	1.29699	0.194634	0.322753	138.383	152.381	148.388	175.425	164.214	166.343	211.84	170.883	173.816
MSMEG_1331	132.206	0.59561	0.150386	3.96054	7.47817e-05	0.000267455	-0.107695	0.169396	-0.635758	0.524934	0.665153	118.846	100.901	127.348	108.043	100.13	109.956	194.674	153.446	176.511
MSMEG_1332	89.981	0.0630223	0.180765	0.348641	0.727359	0.803286	0.0675274	0.195282	0.345794	0.729498	0.825704	110.706	71.0426	80.8383	75.514	110.143	90.2201	88.9492	94.1599	88.2554
MSMEG_1333	128.266	-0.954701	0.136665	-6.98569	2.83463e-12	2.76724e-11	-1.01304	0.156991	-6.45282	1.09789e-10	1.45426e-09	180.712	195.625	201.542	101.073	96.1252	81.762	93.6307	109.272	94.6556
MSMEG_1334	435.66	-0.534713	0.124253	-4.30343	1.68174e-05	6.74954e-05	-0.665905	0.130764	-5.09243	3.53495e-07	2.7291e-06	506.318	571.43	625.666	347.365	324.423	387.665	418.998	330.141	408.939
MSMEG_1335	6.29885	0.554755	0.374478	1.48141	0.138498	0.219155	0.477925	0.387458	1.23349	0.217394	0.351793	3.25607	4.11841	4.4295	6.97053	6.00782	8.45814	7.41243	9.29974	6.73705
MSMEG_1336	110.348	0.736429	0.147138	5.00503	5.58533e-07	2.79905e-06	0.0224796	0.17001	0.132225	0.894806	0.94047	100.938	87.5162	80.8383	90.6168	86.1122	93.0395	148.249	156.933	148.889
MSMEG_1337	14.2156	-0.213892	0.329604	-0.648936	0.51638	0.623643	0.549597	0.33942	1.61922	0.105399	0.202477	6.51213	16.4736	13.2885	17.4263	16.0209	28.1938	10.9236	6.97481	12.1267
MSMEG_1338	823.856	-0.73467	0.181805	-4.04099	5.32268e-05	0.000195472	0.302915	0.182154	1.66296	0.0963198	0.188116	952.399	881.34	780.699	965.418	1443.88	862.73	493.512	610.296	424.434
MSMEG_1340	5832.66	-0.528013	0.117521	-4.49292	7.02519e-06	2.96629e-05	-0.160902	0.117838	-1.36545	0.172112	0.293175	7132.41	6697.57	6512.47	5669.36	7057.19	5430.12	4330.03	5252.03	4412.77
MSMEG_1341	4441.1	-0.397909	0.133811	-2.97367	0.00294263	0.00766577	-0.207292	0.134231	-1.54429	0.122518	0.227129	5318.78	4943.12	5017.51	4121.9	4844.31	4213.56	3353.93	4752.17	3404.57
MSMEG_1342	3377.11	-0.437687	0.0746286	-5.86487	4.49481e-09	2.93256e-08	-0.262603	0.0757372	-3.46729	0.000525735	0.00222797	4099.39	3932.05	3799.4	3333.07	3440.48	3073.12	2769.13	3053.8	2893.56
MSMEG_1343	670.795	-0.801737	0.167524	-4.7858	1.70304e-06	7.90739e-06	0.133624	0.168228	0.794305	0.427018	0.575135	796.108	775.291	693.216	815.551	979.275	704.845	363.599	549.847	359.422
MSMEG_1348	87.2668	-0.825476	0.167795	-4.91956	8.67376e-07	4.18404e-06	-0.00450898	0.176298	-0.0255759	0.979596	0.989536	100.938	109.138	98.5563	98.7491	84.1095	122.643	54.2278	60.4483	56.5913
MSMEG_1349	566.66	-0.790133	0.104337	-7.57288	3.65032e-14	4.35256e-13	-0.307416	0.107905	-2.84894	0.00438647	0.0141548	618.652	751.61	766.303	554.157	594.775	580.792	386.617	437.088	409.95
MSMEG_1350	2443.86	-0.914739	0.103064	-8.87547	6.96373e-19	1.24325e-17	-0.406757	0.103887	-3.91538	9.02629e-05	0.000455474	3078.61	3318.41	3261.22	2363.01	2541.31	2351.36	1476.24	1935.51	1669.11
MSMEG_1351	231.94	-0.0942927	0.145568	-0.647757	0.517142	0.624219	0.108201	0.152192	0.710952	0.477114	0.623065	232.809	267.697	188.254	241.645	266.347	239.647	204.037	247.606	199.417
MSMEG_1352	570.663	-0.0146443	0.124776	-0.117364	0.906571	0.936653	-0.819482	0.13209	-6.20398	5.50544e-10	6.56456e-09	696.798	643.502	684.357	408.937	346.451	366.519	748.266	545.197	695.938
MSMEG_1353	1032.23	0.0683144	0.0818018	0.83512	0.40365	0.515248	-0.558487	0.0874195	-6.38859	1.6742e-10	2.13582e-09	1240.56	1103.73	1073.05	767.92	762.994	771.1	1243.34	1157.82	1169.55
MSMEG_1354	37.1076	-0.50755	0.237336	-2.13853	0.032474	0.0643601	0.0668674	0.251392	0.265989	0.790248	0.868797	39.0728	32.9473	50.9392	40.6614	48.0626	42.2907	31.6004	19.762	28.6325
MSMEG_1355	54.2288	-0.251931	0.258355	-0.975135	0.329493	0.439905	-0.291305	0.271567	-1.07268	0.283414	0.424539	47.2129	64.865	76.4088	52.2789	34.0443	62.0263	67.102	30.2242	53.8964
MSMEG_1356	101.53	0.0214226	0.14883	0.143939	0.885548	0.921307	-0.407412	0.171754	-2.37207	0.0176887	0.0470314	107.45	108.108	117.382	85.9698	82.1069	78.9426	121.33	99.9722	112.509
MSMEG_1357	52.6872	-0.33101	0.249652	-1.32589	0.184877	0.276811	0.175395	0.258872	0.677535	0.498067	0.641376	71.6334	44.2729	46.5097	68.5435	72.0939	43.7004	31.2102	55.7985	40.4223
MSMEG_1358	497.154	0.935774	0.133168	7.02702	2.1099e-12	2.09713e-11	0.638017	0.137566	4.6379	3.51963e-06	2.32636e-05	304.442	339.769	344.393	512.334	456.595	592.07	703.791	540.548	680.442
MSMEG_1359	36.7266	-0.203469	0.239322	-0.850188	0.395221	0.506851	-0.0374522	0.258516	-0.144874	0.88481	0.93384	26.0485	51.4801	37.6507	42.9849	32.0417	38.0616	30.0399	37.199	35.0327
MSMEG_1360	796.256	0.404915	0.099671	4.06251	4.8547e-05	0.000179794	0.353149	0.103139	3.42402	0.000617018	0.00257221	617.024	643.502	723.115	823.684	835.088	890.924	921.873	790.478	920.618
MSMEG_1361	2768.02	0.59199	0.0786103	7.5307	5.04708e-14	5.9532e-13	0.606081	0.0798034	7.59468	3.08558e-14	6.33508e-13	2067.6	2029.35	2070.79	3250.59	3116.06	3059.03	3278.64	2820.15	3219.97
MSMEG_1362	252.488	0.941611	0.128178	7.3461	2.04079e-13	2.26486e-12	1.13228	0.134221	8.4359	3.28652e-17	9.18827e-16	118.846	146.204	167.213	353.173	318.415	308.722	287.134	294.104	278.577
MSMEG_1363	350.828	0.49077	0.173642	2.82633	0.0047084	0.0117175	0.804123	0.176352	4.55975	5.12154e-06	3.28278e-05	226.297	242.986	277.951	475.157	422.55	449.691	410.805	246.443	405.571
MSMEG_1366	936.548	-0.18049	0.117833	-1.53174	0.125587	0.202232	0.204692	0.119614	1.71127	0.0870318	0.174011	913.326	907.08	949.02	1022.34	1161.51	1024.84	717.446	966.011	767.35
MSMEG_1369	36.1567	0.325969	0.245371	1.32847	0.184023	0.275949	-0.118325	0.271992	-0.43503	0.663541	0.777809	37.4447	38.0953	25.4696	34.8526	32.0417	23.9647	37.8424	56.9609	38.7381
MSMEG_1370	3.23615	0.41011	0.39181	1.04671	0.295235	0.403682	-0.159161	0.384791	-0.41363	0.679145	0.788197	1.62803	2.05921	4.4295	1.16175	2.00261	2.81938	4.68154	6.97481	3.36853
MSMEG_1371	4.27967	-0.0281563	0.391386	-0.0719399	0.94265	0.961678	0.0812364	0.392315	0.207069	0.835956	0.898451	8.14016	2.05921	3.32212	5.80877	2.00261	5.63876	5.85192	2.32494	3.36853
MSMEG_1372	6.62374	0.112219	0.377027	0.297643	0.765976	0.834679	-0.540093	0.390386	-1.38349	0.166516	0.286132	11.3962	8.23682	3.32212	2.32351	6.00782	2.81938	5.46179	11.6247	8.42132
MSMEG_1373	10.8429	-0.166715	0.327614	-0.508877	0.610838	0.707049	-0.442029	0.35765	-1.23592	0.216487	0.35083	13.0243	15.444	9.96637	6.97053	10.013	8.45814	10.1433	12.7871	10.7793
MSMEG_1374	21.4894	-0.387637	0.3086	-1.25612	0.209073	0.305707	-0.463754	0.328978	-1.40968	0.158634	0.276038	42.3288	15.444	24.3622	12.7793	28.0365	14.0969	21.0669	17.437	17.8532
MSMEG_1375	75.4533	-0.726049	0.190316	-3.81497	0.000136197	0.000464851	-0.701275	0.208821	-3.35825	0.00078437	0.00315767	79.7736	123.552	108.523	56.926	58.0756	71.8942	65.1514	48.8236	66.36
MSMEG_1376	114.974	-0.574875	0.164533	-3.49397	0.00047589	0.0014797	-0.77346	0.182129	-4.24676	2.16884e-05	0.000122945	151.407	153.411	163.891	85.9698	80.1043	98.6783	120.159	76.7229	104.424
MSMEG_1377	79.4435	-0.653239	0.220726	-2.95951	0.00308132	0.0079859	-0.502494	0.232691	-2.15949	0.0308119	0.0745888	81.4016	130.76	101.878	84.8081	48.0626	78.9426	76.4651	47.6612	65.0126
MSMEG_1378	78.3676	-0.674943	0.17641	-3.82598	0.000130254	0.000445946	-0.947409	0.201253	-4.70756	2.50699e-06	1.7086e-05	104.194	120.464	112.952	60.4112	54.0704	52.1585	80.3664	52.311	68.3811
MSMEG_1379	394.093	-0.978103	0.106546	-9.18011	4.3065e-20	8.57385e-19	-0.508598	0.111984	-4.54169	5.58041e-06	3.55265e-05	529.111	595.11	487.245	385.702	384.501	356.651	281.282	268.53	258.703
MSMEG_1380	48.2996	-0.967646	0.215494	-4.49037	7.11e-06	2.99825e-05	-0.624686	0.234281	-2.6664	0.00766686	0.0229169	63.4933	68.9834	74.1941	30.2056	46.06	54.9779	35.5017	25.5743	35.7064
MSMEG_1381	195.66	-0.0796344	0.127439	-0.62488	0.53205	0.637615	-0.430193	0.142005	-3.02942	0.00245024	0.00860859	214.9	229.601	208.186	160.322	172.224	149.427	194.284	238.306	193.69
MSMEG_1382	1561.75	-0.213744	0.0793479	-2.69376	0.00706516	0.0168732	-0.578944	0.0827646	-6.99508	2.65117e-12	4.26916e-11	1883.63	1959.33	1715.32	1175.7	1317.72	1219.38	1619.03	1594.91	1570.74
MSMEG_1383	684.408	-0.719869	0.09494	-7.58236	3.39325e-14	4.06078e-13	-0.579556	0.0996173	-5.81782	5.96195e-09	5.97104e-08	869.369	923.554	929.087	609.921	570.743	627.312	582.851	481.262	565.576
MSMEG_1384	111.595	0.980784	0.164836	5.95007	2.68022e-09	1.81163e-08	0.308702	0.183142	1.68559	0.0918747	0.181375	87.9138	75.161	74.1941	91.7786	88.1148	114.185	163.854	136.009	173.142
MSMEG_1385	383.711	-0.192149	0.102973	-1.86602	0.0620388	0.112285	-0.0340692	0.109453	-0.311267	0.755598	0.843691	402.124	396.397	416.373	384.541	406.529	397.532	363.599	310.379	375.928
MSMEG_1386	28.2874	-0.186537	0.259927	-0.717653	0.472971	0.583006	0.5506	0.271825	2.02556	0.0428095	0.0978971	26.0485	21.6217	26.577	34.8526	50.0652	32.4229	24.1879	18.5995	20.2112
MSMEG_1387	401.378	0.0378707	0.105363	0.359431	0.719273	0.797035	-0.424514	0.114898	-3.6947	0.000220149	0.00102001	480.27	385.071	445.164	326.453	294.383	339.735	447.087	458.012	436.224
MSMEG_1388	176.824	0.201783	0.131638	1.53287	0.125309	0.20189	-0.315763	0.147916	-2.13475	0.0327818	0.0786619	208.388	154.44	180.502	137.087	154.201	139.559	208.719	195.295	213.228
MSMEG_1389	88.449	0.260122	0.18108	1.4365	0.150859	0.234479	-0.0203781	0.19851	-0.102655	0.918237	0.953051	86.2857	95.7531	66.4424	92.9403	76.0991	73.3039	90.1196	117.409	97.6873
MSMEG_1390	65.6125	0.485423	0.196985	2.46426	0.0137296	0.0304535	0.287101	0.215208	1.33406	0.182184	0.307146	43.9569	56.6282	59.7982	68.5435	72.0939	62.0263	86.9986	59.2859	81.1815
MSMEG_1391	26.7938	-0.289188	0.25958	-1.11406	0.265253	0.370796	0.00354884	0.279816	0.0126828	0.989881	0.994861	24.4205	23.6809	36.5433	26.7203	28.0365	31.0132	21.457	29.0617	20.2112
MSMEG_1392	330.23	-0.188095	0.123788	-1.51949	0.128638	0.206286	-0.683289	0.134224	-5.09067	3.56792e-07	2.74809e-06	429.801	334.621	431.876	219.572	244.318	269.251	336.681	349.903	356.053
MSMEG_1393	321.199	-0.465308	0.162495	-2.86352	0.00418957	0.0105381	0.121622	0.165358	0.735509	0.46203	0.609545	369.563	328.443	327.783	328.776	446.582	349.603	205.988	310.379	223.67
MSMEG_1394	305.312	-0.360252	0.207478	-1.73634	0.0825042	0.142645	0.0820841	0.209885	0.39109	0.695731	0.800938	366.307	289.318	314.494	355.497	326.425	346.784	182.19	365.015	201.775
MSMEG_1395	367.101	-0.49171	0.108573	-4.52883	5.93111e-06	2.53694e-05	-0.0894081	0.113941	-0.784686	0.432638	0.580681	407.008	435.522	405.299	385.702	344.449	437.004	282.063	318.516	288.346
MSMEG_1396	325.814	-0.531926	0.104745	-5.0783	3.80818e-07	1.93501e-06	0.0183037	0.110159	0.166157	0.868034	0.921821	343.515	373.746	364.326	345.041	366.477	389.074	232.126	265.043	252.976
MSMEG_1397	1023.24	-0.382617	0.0692897	-5.522	3.35172e-08	1.94874e-07	0.0221067	0.0723562	0.305527	0.759965	0.847128	1087.53	1125.36	1096.3	1104.83	1147.49	1115.06	827.852	836.977	867.733
MSMEG_1400	33968.8	-0.856139	0.149472	-5.72775	1.01771e-08	6.31983e-08	-0.54977	0.14952	-3.6769	0.000236082	0.0010839	48092.1	45828.6	44228.5	30542.5	34250.6	28195.2	20752.1	31970.2	21859.7
MSMEG_1402	740.38	-0.538711	0.077887	-6.91657	4.62714e-12	4.39947e-11	0.0774052	0.0808938	0.956874	0.338631	0.484391	823.784	782.498	828.316	898.036	823.072	840.175	556.713	553.335	557.491
MSMEG_1403	933.333	0.854124	0.10136	8.42661	3.5581e-17	5.46185e-16	0.556557	0.104662	5.31764	1.05119e-07	8.91139e-07	696.798	598.199	657.78	1003.76	885.153	989.602	1129.81	1310.1	1128.79
MSMEG_1404	12.504	0.892268	0.339582	2.62755	0.00860031	0.0201082	0.48736	0.360656	1.35131	0.176595	0.299336	9.7682	9.26642	4.4295	19.7498	8.01043	8.45814	18.7261	16.2745	17.8532
MSMEG_1405	0.384832	-0.0500021	0.222265	-0.224967	0.822005	NA	0.022272	0.214785	0.103695	0.917412	NA	1.62803	0	0	1.16175	0	0	0	0	0.673705
MSMEG_1406	6.33732	0.54304	0.38153	1.42332	0.154642	0.23951	0.401469	0.390626	1.02776	0.304064	0.446778	3.25607	3.08881	5.53687	5.80877	6.00782	8.45814	4.68154	12.7871	7.41076
MSMEG_1407	32.5093	0.219654	0.243247	0.903006	0.366523	0.479215	0.410041	0.2625	1.56206	0.118274	0.221322	26.0485	28.8289	26.577	37.1761	40.0522	36.6519	27.309	32.5491	37.3906
MSMEG_1408	12.3411	0.552357	0.33092	1.66915	0.0950869	0.160473	0.64603	0.350259	1.84444	0.0651197	0.137809	8.14016	9.26642	6.64424	12.7793	14.0183	18.326	12.4841	16.2745	13.1373
MSMEG_1411	71.9393	0.551887	0.176511	3.12665	0.00176811	0.00484222	0.189965	0.19851	0.956953	0.338591	0.484391	52.097	54.5689	69.7646	69.7053	74.0965	62.0263	88.5591	86.0226	90.6134
MSMEG_1412	85.9741	0.195587	0.16388	1.19348	0.232683	0.333555	-0.41554	0.189762	-2.18979	0.0285393	0.070016	104.194	83.3978	84.1604	65.0582	66.0861	66.2554	101.433	90.6725	112.509
MSMEG_1414	113.597	0.602698	0.16545	3.64279	0.000269702	0.000873308	-0.189297	0.186225	-1.01649	0.309395	0.452018	130.243	87.5162	85.2678	92.9403	80.1043	83.1717	147.859	167.395	147.878
MSMEG_1415	5.51684	0.212159	0.385038	0.551008	0.581628	0.681888	-0.0349651	0.392183	-0.0891551	0.928959	0.959996	4.8841	6.17762	4.4295	4.64702	8.01043	2.81938	10.1433	3.4874	5.05279
MSMEG_1416	1685.9	0.92251	0.0689505	13.3793	7.98951e-41	6.10361e-39	0.641299	0.0716664	8.94839	3.60689e-19	1.22784e-17	1194.98	1080.05	1122.88	1722.88	1794.34	1794.53	2151.95	2199.39	2112.07
MSMEG_1417	304.899	1.82998	0.132502	13.811	2.1886e-43	1.96722e-41	2.49794	0.135177	18.479	3.04834e-76	2.00276e-73	83.0297	82.3682	90.8047	506.525	480.626	546.96	337.071	301.079	315.631
MSMEG_1418	117.559	1.83349	0.206036	8.89891	5.63992e-19	1.01797e-17	2.71854	0.208754	13.0227	9.09383e-39	1.29884e-36	30.9326	29.8585	22.1475	214.925	228.297	201.586	123.671	86.0226	120.593
MSMEG_1419	132.774	-0.0223589	0.135976	-0.164433	0.869391	0.909738	0.0365028	0.149929	0.243467	0.807644	0.880262	133.499	130.76	135.1	146.381	114.149	143.788	131.863	126.709	132.72
MSMEG_1420	33.8072	-0.247719	0.236251	-1.04854	0.294389	0.402861	-0.464995	0.265276	-1.75288	0.0796233	0.162065	40.7008	42.2137	37.6507	25.5586	32.0417	26.7841	26.5287	33.7116	39.0749
MSMEG_1421	322.523	-0.821631	0.123005	-6.67963	2.39548e-11	2.10405e-10	-0.674935	0.130541	-5.1703	2.3372e-07	1.86805e-06	519.342	413.9	406.406	260.233	280.365	284.757	267.628	225.519	244.555
MSMEG_1422	424.254	-0.520028	0.15108	-3.44208	0.000577262	0.00175421	-0.656108	0.156371	-4.19584	2.71864e-05	0.000152012	670.749	503.476	478.386	349.688	372.485	304.493	354.236	445.225	339.548
MSMEG_1423	821.793	-0.571514	0.139516	-4.09641	4.19614e-05	0.000157715	-0.606389	0.142342	-4.26008	2.04357e-05	0.00011675	1225.91	933.85	1037.61	651.744	746.973	671.012	607.039	846.277	675.726
MSMEG_1424	1033.13	-0.718544	0.109452	-6.5649	5.20664e-11	4.35766e-10	-0.456206	0.111786	-4.08108	4.48276e-05	0.00023964	1530.35	1266.41	1202.61	954.962	1061.38	879.646	776.355	820.702	805.752
MSMEG_1425	299.279	-0.349607	0.107288	-3.25858	0.0011197	0.00319984	-0.0631562	0.114598	-0.551109	0.581559	0.71361	337.003	328.443	318.924	312.512	348.454	284.757	268.798	240.631	253.987
MSMEG_1426	473.247	-0.0838613	0.130533	-0.642452	0.52058	0.627216	0.107649	0.134269	0.801742	0.422702	0.571032	459.105	480.824	473.956	530.922	482.629	511.717	491.951	346.415	481.699
MSMEG_1427	13.8767	0.184183	0.317657	0.579818	0.562037	0.663895	-0.188744	0.345224	-0.546728	0.584566	0.716411	11.3962	18.5328	12.1811	16.2646	10.013	8.45814	17.5558	11.6247	18.8638
MSMEG_1428	421.437	0.0186273	0.110424	0.168688	0.866042	0.906901	0.359114	0.114743	3.12972	0.00174973	0.00642938	359.795	418.019	372.078	519.304	450.587	511.717	418.607	351.065	391.76
MSMEG_1429	85.6166	0.289439	0.18305	1.5812	0.113832	0.185946	-0.138515	0.202576	-0.68377	0.494121	0.637669	81.4016	81.3386	81.9457	67.3817	56.073	94.4492	92.0702	120.897	94.9925
MSMEG_1430	85.8909	0.333243	0.16937	1.96755	0.0491202	0.0917078	0.220019	0.186424	1.18021	0.237916	0.375205	58.6092	84.4274	78.6236	83.6463	96.1252	87.4008	101.823	86.0226	96.3399
MSMEG_1431	45.1725	0.210947	0.241011	0.875261	0.381432	0.494477	0.30359	0.25652	1.1835	0.236613	0.373599	48.841	25.7401	44.295	36.0144	50.0652	63.436	46.0351	47.6612	44.4646
MSMEG_1432	494.105	-0.620773	0.124454	-4.98797	6.1017e-07	3.03239e-06	0.305532	0.125936	2.42609	0.0152624	0.0411973	486.782	545.689	509.392	628.509	682.889	611.805	375.303	267.368	339.211
MSMEG_1433	73.5766	-0.634335	0.199721	-3.17611	0.00149265	0.00416953	0.124715	0.207511	0.601004	0.547837	0.684867	78.1456	92.6642	73.0867	104.558	78.1017	83.1717	41.3536	51.1486	59.9598
MSMEG_1434	153.189	-0.31134	0.132034	-2.35803	0.0183724	0.0392669	0.147826	0.141348	1.04583	0.29564	0.438059	174.199	146.204	155.032	176.587	188.245	162.114	122.89	122.059	131.373
MSMEG_1445	4889.91	-0.557906	0.119029	-4.68713	2.77063e-06	1.25193e-05	-0.306502	0.11946	-2.56573	0.010296	0.0294619	6220.71	5986.11	5551.27	4662.12	5052.58	4573.03	3418.69	4748.68	3795.99
MSMEG_1446	610.675	-0.644844	0.0948985	-6.79509	1.08248e-11	9.85026e-11	0.0221904	0.0976659	0.227207	0.820263	0.889776	669.121	669.242	735.296	666.847	690.9	751.365	425.24	418.488	469.573
MSMEG_1447	90.1781	-0.860405	0.166113	-5.17964	2.22312e-07	1.16474e-06	-0.301466	0.178084	-1.69283	0.0904871	0.179336	122.102	128.7	96.3415	96.4256	96.1252	85.9911	65.5415	62.7733	57.6018
MSMEG_1448	413.716	-0.629463	0.109105	-5.76931	7.95984e-09	5.01401e-08	-0.235936	0.114062	-2.06848	0.0385947	0.0900451	478.642	552.897	460.668	415.908	440.574	411.629	292.596	341.766	328.768
MSMEG_1449	1.95534	-0.258651	0.379235	-0.682035	0.495217	0.604978	-0.426955	0.358443	-1.19114	0.2336	0.369998	4.8841	2.05921	2.21475	0	2.00261	1.40969	1.17038	1.16247	2.69482
MSMEG_1450	4.00085	0.546721	0.391232	1.39744	0.162283	0.249637	-0.052705	0.390086	-0.135111	0.892524	0.938822	1.62803	3.08881	4.4295	5.80877	2.00261	0	7.02231	6.97481	5.05279
MSMEG_1451	506.762	0.847336	0.129049	6.56598	5.16911e-11	4.33177e-10	0.695366	0.13313	5.22319	1.75867e-07	1.43533e-06	393.984	333.591	293.454	533.245	584.762	554.008	559.444	709.105	599.261
MSMEG_1452	168.622	0.512641	0.157219	3.26068	0.00111146	0.00317766	0.455961	0.166267	2.74235	0.00610021	0.0188362	115.59	134.878	145.066	203.307	182.237	167.753	210.669	152.283	205.817
MSMEG_1453	54.7832	0.821048	0.21225	3.86831	0.000109593	0.000380765	1.00739	0.226367	4.45025	8.57703e-06	5.31048e-05	34.1887	33.9769	28.7917	60.4112	76.0991	74.7136	55.0081	70.9105	58.9492
MSMEG_1454	4.40491	0.381438	0.391397	0.974556	0.329781	0.440199	0.549704	0.389037	1.41299	0.15766	0.274901	1.62803	5.14801	0	6.97053	10.013	1.40969	3.12102	6.97481	4.37908
MSMEG_1455	100.674	-0.277756	0.187864	-1.47849	0.139276	0.220121	0.213216	0.195895	1.08842	0.27641	0.417283	76.5175	118.404	108.523	138.249	106.138	112.775	87.3887	65.0982	92.9713
MSMEG_1456	37.9464	0.358144	0.235658	1.51976	0.128572	0.206257	0.0844558	0.259459	0.325507	0.744797	0.835893	30.9326	41.1841	29.8991	44.1467	28.0365	35.2422	50.7166	34.874	46.4857
MSMEG_1457	8.9855	0.670589	0.356222	1.8825	0.0597681	0.108624	-0.0706771	0.3798	-0.18609	0.852374	0.909951	9.7682	6.17762	5.53687	8.13228	8.01043	2.81938	14.0446	16.2745	10.1056
MSMEG_1458	39.2709	-0.0110065	0.23363	-0.0471108	0.962425	0.975641	-0.176339	0.257665	-0.684373	0.493739	0.637553	39.0728	40.1545	42.0802	37.1761	36.0469	32.4229	35.5017	56.9609	34.0221
MSMEG_1459	9.79661	0.233556	0.346999	0.673075	0.500899	0.610558	0.211517	0.366641	0.576904	0.564004	0.698098	4.8841	10.296	8.85899	9.29403	16.0209	7.04845	9.36307	11.6247	10.7793
MSMEG_1460	12.8	0.423101	0.327686	1.29118	0.196641	0.290976	0.2108	0.351074	0.600444	0.54821	0.685133	11.3962	11.3256	8.85899	16.2646	8.01043	12.6872	11.7038	17.437	17.5163
MSMEG_1461	19.5368	-0.110775	0.287247	-0.385646	0.699759	0.780944	-0.124623	0.311869	-0.399602	0.68945	0.795602	19.5364	16.4736	27.6844	20.9116	14.0183	21.1453	22.2373	13.9496	19.8743
MSMEG_1462	8.29181	0.582194	0.363083	1.60348	0.10883	0.17929	0.758183	0.376515	2.01369	0.0440425	0.100298	4.8841	5.14801	4.4295	9.29403	12.0156	12.6872	10.9236	5.81234	9.43188
MSMEG_1463	31.2155	0.431651	0.251043	1.71943	0.0855363	0.146921	0.228038	0.274884	0.829578	0.406777	0.555099	27.6766	19.5625	32.1138	38.3379	28.0365	26.7841	36.2819	31.3866	40.7592
MSMEG_1464	6.38602	0.893596	0.388041	2.30284	0.0212878	0.044485	0.815164	0.392259	2.07813	0.0376976	0.0883917	4.8841	2.05921	1.10737	10.4558	4.00522	9.86783	14.0446	4.64987	6.4002
MSMEG_1475	191.155	-0.498877	0.156786	-3.1819	0.0014631	0.00409219	-0.623731	0.167479	-3.72424	0.000195901	0.000916715	265.369	218.276	259.126	144.058	150.196	176.211	187.652	130.196	189.311
MSMEG_1477	7405.79	0.0172454	0.0860726	0.200359	0.8412	0.890826	0.110764	0.0864938	1.2806	0.200336	0.330539	7041.24	7167.06	7331.92	7323.7	8585.18	7388.18	6899.02	7800.16	7115.68
MSMEG_1478	617.886	0.0466926	0.0995257	0.469151	0.638962	0.730719	0.0984262	0.103907	0.947249	0.343512	0.489348	610.512	615.702	569.19	658.715	618.806	642.818	683.114	559.147	602.966
MSMEG_1479	323.432	-0.261921	0.129457	-2.02322	0.0430502	0.0821254	-0.296406	0.136613	-2.16968	0.0300312	0.0730489	384.216	353.154	361.004	286.953	326.425	277.709	282.063	366.177	273.188
MSMEG_1480	162.912	-0.518068	0.165034	-3.13916	0.00169433	0.00467327	-0.207687	0.172947	-1.20087	0.229801	0.365656	172.571	185.328	212.616	152.19	166.216	174.802	112.357	170.883	119.246
MSMEG_1481	97.1627	-0.56235	0.162799	-3.45426	0.000551813	0.00168938	-0.139826	0.174962	-0.799179	0.424187	0.572495	100.938	107.079	131.778	118.499	94.1226	93.0395	73.3441	80.2103	75.455
MSMEG_1482	217.59	-0.664504	0.111738	-5.947	2.73093e-09	1.84023e-08	-0.0913102	0.119433	-0.764531	0.444551	0.592434	249.089	259.46	253.589	223.057	244.318	250.925	155.271	161.583	161.016
MSMEG_1486	539.021	-1.2478	0.108539	-11.4963	1.37636e-30	5.6517e-29	-0.268998	0.110285	-2.43911	0.0147233	0.0400217	700.054	766.024	697.646	621.538	658.858	515.946	308.591	276.667	305.862
MSMEG_1487	137.743	-0.843897	0.152774	-5.52384	3.31676e-08	1.93355e-07	0.122962	0.157372	0.781344	0.4346	0.582244	174.199	153.411	142.851	146.381	194.253	176.211	79.196	80.2103	92.9713
MSMEG_1488	52.8118	-0.30278	0.208168	-1.4545	0.145807	0.22776	0.802264	0.213445	3.75865	0.000170832	0.000813897	39.0728	45.3025	45.4023	73.1905	82.1069	84.5814	38.6227	36.0365	30.9904
MSMEG_1489	19.1401	0.392382	0.314071	1.24934	0.21154	0.308574	0.776902	0.327231	2.37417	0.0175886	0.046841	16.2803	8.23682	14.3959	18.5881	24.0313	33.8326	18.336	24.4118	14.1478
MSMEG_1490	23.0285	0.390471	0.301455	1.29529	0.195221	0.2892	0.844455	0.313286	2.69547	0.00702887	0.0213006	13.0243	14.4144	17.718	33.6909	26.0339	33.8326	14.4347	32.5491	21.5586
MSMEG_1491	50.4429	0.544536	0.2643	2.0603	0.0393701	0.076077	0.724473	0.274112	2.64298	0.00821791	0.0243535	32.5607	33.9769	37.6507	38.3379	80.1043	73.3039	60.86	34.874	62.3177
MSMEG_1492	204.445	1.26562	0.227364	5.56647	2.59947e-08	1.53033e-07	0.74139	0.232789	3.18481	0.00144847	0.00543176	83.0297	116.345	140.637	206.792	186.243	212.863	368.671	182.507	342.916
MSMEG_1493	77.8064	0.427737	0.186073	2.29876	0.0215187	0.044896	0.373696	0.201475	1.8548	0.0636245	0.135192	58.6092	68.9834	62.0129	90.6168	90.1174	71.8942	101.433	74.3979	82.1921
MSMEG_1494	54.9101	0.541324	0.215633	2.5104	0.0120596	0.0272179	0.437035	0.232932	1.87624	0.060623	0.130034	40.7008	46.3321	39.8655	59.2495	72.0939	49.3391	71.3934	46.4987	68.7179
MSMEG_1495	8.69901	0.570408	0.36641	1.55675	0.119531	0.19381	0.501663	0.379377	1.32233	0.186058	0.311598	3.25607	6.17762	7.75162	12.7793	8.01043	9.86783	11.3137	4.64987	14.4847
MSMEG_1497	989.883	-0.840692	0.103571	-8.11702	4.77776e-16	6.69293e-15	-1.12362	0.108106	-10.3937	2.64904e-25	1.5822e-23	1600.36	1473.36	1369.82	719.126	676.882	608.986	745.535	891.613	823.268
MSMEG_1499	52.5836	-0.34001	0.221169	-1.53733	0.124212	0.20041	-0.942773	0.250495	-3.76364	0.000167457	0.000801888	87.9138	47.3617	77.5162	36.0144	34.0443	29.6035	60.4699	51.1486	49.1805
MSMEG_1500	20.3942	0.287602	0.274891	1.04624	0.29545	0.403893	-0.0380798	0.306268	-0.124335	0.90105	0.94368	21.1644	15.444	21.0401	20.9116	20.0261	14.0969	24.1879	22.0869	24.5902
MSMEG_1501	349.823	0.417441	0.10192	4.09578	4.20756e-05	0.000158054	-0.106454	0.112757	-0.944104	0.345116	0.491101	338.631	334.621	291.239	283.468	298.389	311.541	444.356	427.788	418.371
MSMEG_1502	180.776	0.584175	0.176921	3.30189	0.000960357	0.00278321	-0.261506	0.189738	-1.37825	0.168128	0.288181	223.04	133.848	131.778	118.499	148.193	132.511	249.292	258.068	231.755
MSMEG_1503	91.7528	0.65165	0.156732	4.15773	3.2142e-05	0.000122989	-0.261982	0.185498	-1.41232	0.157856	0.27511	86.2857	83.3978	71.9793	59.2495	66.0861	73.3039	125.621	132.521	127.33
MSMEG_1504	81.7743	0.650527	0.214102	3.0384	0.00237842	0.00636505	0.132724	0.229797	0.577571	0.563554	0.697672	65.1213	77.2202	56.4761	76.6758	68.0887	74.7136	119.769	70.9105	126.993
MSMEG_1505	98.9142	0.851018	0.160256	5.31035	1.09412e-07	5.99032e-07	0.236356	0.181028	1.30563	0.191677	0.319139	71.6334	80.309	69.7646	97.5874	76.0991	87.4008	142.397	123.222	141.815
MSMEG_1506	134.378	0.684204	0.214641	3.18767	0.00143425	0.0040132	0.335527	0.223235	1.50302	0.132833	0.241592	84.6577	110.167	110.737	131.278	124.162	140.969	213.01	105.785	188.638
MSMEG_1507	3.48113	0.0244194	0.391645	0.0623509	0.950283	0.966195	0.213803	0.388035	0.550989	0.581641	0.71361	1.62803	5.14801	2.21475	3.48526	6.00782	4.22907	3.90128	0	4.71594
MSMEG_1508	11.233	0.434142	0.347064	1.2509	0.210971	0.308086	0.0767159	0.367749	0.208609	0.834753	0.897797	9.7682	9.26642	8.85899	15.1028	10.013	4.22907	13.6545	19.762	10.4424
MSMEG_1509	17.3471	-0.482637	0.30013	-1.60809	0.107815	0.178065	-0.566169	0.327392	-1.72933	0.0837497	0.168422	14.6523	25.7401	26.577	17.4263	12.0156	11.2775	12.8742	22.0869	13.4741
MSMEG_1510	530.856	-0.637718	0.117751	-5.41583	6.10062e-08	3.42574e-07	-0.408239	0.12196	-3.34732	0.000815967	0.00327283	600.744	722.781	673.283	496.069	486.634	514.537	372.182	489.399	422.076
MSMEG_1511	27.6562	0.100115	0.25542	0.391964	0.695085	0.77718	-0.0941925	0.28218	-0.333803	0.738528	0.831279	26.0485	33.9769	23.2549	25.5586	18.0235	32.4229	27.6991	27.8992	34.0221
MSMEG_1513	934.638	-0.203194	0.0820842	-2.47543	0.0133074	0.0296674	-0.0244537	0.0854652	-0.286124	0.774783	0.857823	963.795	931.79	1055.33	984.006	929.21	983.963	816.538	875.338	871.775
MSMEG_1514	943.098	-0.155252	0.102849	-1.50951	0.131168	0.209524	0.382978	0.104556	3.6629	0.00024938	0.00114017	971.935	813.386	863.752	1224.49	1151.5	1084.05	758.799	874.176	745.792
MSMEG_1515	3101.48	0.0269855	0.0758014	0.356003	0.721839	0.799358	0.709139	0.0763589	9.28691	1.58828e-20	5.96287e-19	2713.93	2465.9	2446.19	4258.99	4249.53	4004.93	2464.83	2736.45	2572.54
MSMEG_1516	4080.09	0.389488	0.0906867	4.29488	1.74788e-05	6.98513e-05	0.913783	0.091097	10.0309	1.11519e-23	5.27107e-22	2811.61	3041.45	2860.35	5591.52	5238.82	5730.39	4081.52	3378.13	3986.99
MSMEG_1517	247.448	-0.731781	0.129843	-5.6359	1.74148e-08	1.04776e-07	-0.953881	0.142143	-6.71069	1.93701e-11	2.77258e-10	367.935	308.881	385.366	175.425	196.256	166.343	232.516	199.944	194.364
MSMEG_1518	104.147	-0.958915	0.146529	-6.54421	5.98102e-11	4.97409e-10	-0.72239	0.16421	-4.39918	1.08661e-05	6.54955e-05	148.151	143.115	156.14	90.6168	92.12	83.1717	69.4428	74.3979	80.1709
MSMEG_1525	12394.3	-0.597247	0.102155	-5.84646	5.02143e-09	3.26642e-08	-0.16466	0.10232	-1.60927	0.107558	0.205423	14924.2	15009.5	13862.1	12713.1	13711.9	12573	8530.93	11033	9191.03
MSMEG_1526	435.709	-0.415616	0.0904859	-4.59316	4.36583e-06	1.90969e-05	-0.22949	0.0973179	-2.35815	0.0183665	0.048539	488.41	515.831	500.533	417.07	424.553	441.233	363.209	403.376	367.169
MSMEG_1528	549.145	0.665047	0.158245	4.20265	2.6381e-05	0.000102619	0.182293	0.162096	1.1246	0.260758	0.400931	397.24	457.144	461.775	530.922	496.647	476.475	801.713	514.973	805.415
MSMEG_1529	1132.08	0.236336	0.101377	2.33125	0.01974	0.0417687	-0.29659	0.105041	-2.82357	0.00474921	0.0151541	1107.06	1169.63	1133.95	954.962	843.098	962.818	1407.97	1167.12	1442.07
MSMEG_1530	1059.93	-1.05286	0.07981	-13.1921	9.74422e-40	7.11328e-38	-1.35599	0.0859175	-15.7825	4.10463e-56	1.28416e-53	1776.18	1753.41	1594.62	668.009	620.809	683.699	835.654	780.016	826.973
MSMEG_1531	226.412	0.238691	0.111393	2.14278	0.0321306	0.0637374	-0.298324	0.126949	-2.34995	0.0187758	0.0493823	242.577	225.483	215.938	180.072	190.248	181.85	281.672	253.418	266.45
MSMEG_1532	5.89247	0.0892776	0.382486	0.233414	0.81544	0.870704	0.510969	0.389337	1.31241	0.189382	0.315877	4.8841	6.17762	2.21475	10.4558	10.013	4.22907	4.68154	4.64987	5.7265
MSMEG_1533	13.8907	0.600332	0.348393	1.72315	0.0848621	0.14614	0.412437	0.363269	1.13535	0.256228	0.396099	11.3962	10.296	7.75162	16.2646	24.0313	5.63876	19.1163	9.29974	21.2217
MSMEG_1534	50.5065	-0.124964	0.197579	-0.632474	0.527077	0.633534	0.0551686	0.217284	0.2539	0.799572	0.874221	50.469	48.3913	55.3687	49.9554	50.0652	60.6167	50.7166	44.1738	44.8014
MSMEG_1535	14.484	0.587576	0.375939	1.56296	0.118063	0.191999	0.590324	0.381637	1.54682	0.121906	0.22657	11.3962	9.26642	6.64424	18.5881	24.0313	11.2775	22.2373	2.32494	24.5902
MSMEG_1536	29.0362	1.16979	0.262669	4.45346	8.44981e-06	3.51808e-05	1.01601	0.283896	3.57881	0.000345168	0.0015302	16.2803	13.3848	14.3959	33.6909	38.0496	31.0132	36.2819	41.8488	36.3801
MSMEG_1537	14.8185	0.495858	0.351997	1.4087	0.158924	0.245102	0.52824	0.363033	1.45508	0.145648	0.258834	6.51213	11.3256	13.2885	19.7498	6.00782	26.7841	20.6768	8.13727	20.8849
MSMEG_1538	4.7728	0.412134	0.387681	1.06307	0.287749	0.395835	0.368918	0.392774	0.939262	0.347596	0.493454	3.25607	5.14801	1.10737	4.64702	8.01043	4.22907	4.68154	5.81234	6.06335
MSMEG_1539	5.25155	0.805428	0.384518	2.09464	0.0362029	0.0707896	0.711565	0.391937	1.81551	0.0694461	0.145121	1.62803	2.05921	3.32212	8.13228	6.00782	5.63876	6.24205	5.81234	8.42132
MSMEG_1540	3106.29	-1.04394	0.117076	-8.9168	4.79944e-19	8.75898e-18	0.150772	0.117143	1.28708	0.198065	0.32745	3277.23	3975.3	3534.74	3873.29	4299.6	3842.81	1455.18	1887.85	1810.58
MSMEG_1541	3.64341	-0.582126	0.392342	-1.48372	0.137883	0.218333	0.18725	0.390688	0.479282	0.631738	0.753129	4.8841	2.05921	5.53687	3.48526	4.00522	8.45814	2.34077	0	2.02112
MSMEG_1542	283.291	0.316991	0.119944	2.64281	0.008222	0.0193338	0.183103	0.128374	1.42633	0.153774	0.269844	257.229	247.105	251.374	288.115	262.342	305.903	350.335	278.992	308.22
MSMEG_1543	840.815	-1.13643	0.166971	-6.80616	1.00241e-11	9.17246e-11	-1.14865	0.169542	-6.77505	1.24367e-11	1.81576e-10	1678.5	1159.33	1204.82	566.936	610.796	572.334	490.781	740.492	543.343
MSMEG_1544	110.261	-0.909931	0.187359	-4.85663	1.19402e-06	5.64367e-06	-1.10339	0.204332	-5.39997	6.66533e-08	5.8233e-07	211.644	131.789	170.536	83.6463	54.0704	81.762	80.3664	82.5352	96.003
MSMEG_1545	61.012	0.3958	0.202328	1.95623	0.0504378	0.0938212	0.217594	0.220999	0.984594	0.324824	0.468928	43.9569	49.4209	63.1203	62.7347	58.0756	64.8457	78.0256	53.4735	75.455
MSMEG_1546	545.208	-0.875125	0.131978	-6.63085	3.33753e-11	2.88901e-10	-0.450793	0.135046	-3.33806	0.000843641	0.00336534	726.103	664.094	776.269	551.833	532.694	484.933	330.438	469.637	370.875
MSMEG_1547	1310.18	-0.982521	0.120438	-8.15788	3.40946e-16	4.81724e-15	-0.849144	0.122492	-6.93224	4.14231e-12	6.46437e-11	2178.31	1640.16	1946.76	1035.12	1103.44	1013.57	871.546	1078.77	923.987
MSMEG_1548	625.732	-0.937339	0.149549	-6.26777	3.66262e-10	2.75957e-09	-0.913843	0.153145	-5.96717	2.41407e-09	2.57058e-08	996.356	899.873	878.148	501.878	516.673	417.268	376.864	584.721	459.804
MSMEG_1549	673.525	-0.856355	0.0812873	-10.5349	5.96365e-26	1.72604e-24	-0.903639	0.0882939	-10.2344	1.38988e-24	7.3052e-23	1028.92	921.494	967.845	494.907	528.689	524.405	543.839	523.11	528.522
MSMEG_1550	78.5108	-1.13798	0.1912	-5.95181	2.65199e-09	1.79439e-08	-0.823934	0.206785	-3.98449	6.76247e-05	0.000349563	143.267	124.582	94.1268	61.573	64.0835	69.0748	56.9587	38.3614	54.5701
MSMEG_1551	1.74764	0.105979	0.375218	0.282447	0.777601	0.843599	0.0955094	0.357778	0.266952	0.789506	0.868797	0	2.05921	2.21475	1.16175	2.00261	2.81938	1.95064	1.16247	2.35797
MSMEG_1555	7.71808	0.460333	0.383436	1.20055	0.229927	0.330479	0.871407	0.388539	2.24278	0.0249109	0.0623959	1.62803	3.08881	6.64424	9.29403	22.0287	5.63876	9.7532	4.64987	6.73705
MSMEG_1558	4577.7	0.0529103	0.136324	0.388121	0.697927	0.779296	0.28799	0.136666	2.10726	0.0350953	0.0832438	4174.28	4109.14	4320.97	5205.82	5196.77	5086.16	3773.32	5547.3	3785.55
MSMEG_1560	141.913	-0.20066	0.179908	-1.11535	0.264701	0.370412	-0.396476	0.191591	-2.06939	0.0385092	0.0899094	170.943	152.381	162.784	115.014	128.167	119.824	131.473	187.157	109.477
MSMEG_1561	86.6969	0.176648	0.187471	0.942271	0.346054	0.457828	-0.268159	0.206569	-1.29816	0.194234	0.322578	83.0297	81.3386	100.771	75.514	50.0652	87.4008	115.088	98.8098	88.2554
MSMEG_1562	284.259	-0.466332	0.120757	-3.86174	0.000112582	0.000389912	-0.0259885	0.126584	-0.205305	0.837334	0.89949	335.375	337.71	275.736	283.468	332.433	318.59	226.274	209.244	239.502
MSMEG_1563	32.1456	0.0194502	0.236368	0.0822878	0.934418	0.956436	-0.0791978	0.262545	-0.301654	0.762916	0.849552	24.4205	33.9769	38.7581	31.3674	34.0443	28.1938	32.7708	29.0617	36.7169
MSMEG_1564	7.54879	-0.792827	0.36827	-2.15284	0.0313311	0.0623585	0.0774144	0.376132	0.205817	0.836934	0.899237	11.3962	10.296	5.53687	9.29403	12.0156	8.45814	3.90128	2.32494	4.71594
MSMEG_1565	282.247	0.476206	0.10466	4.55005	5.36332e-06	2.31518e-05	-0.119332	0.118068	-1.0107	0.312159	0.455146	258.857	251.223	255.803	243.968	214.279	239.647	345.653	380.127	350.664
MSMEG_1566	258.022	-0.859324	0.1171	-7.33839	2.16176e-13	2.39104e-12	-0.40613	0.124418	-3.26423	0.00109762	0.00424699	327.235	364.479	323.353	274.174	232.303	250.925	174.777	175.533	199.417
MSMEG_1567	522.667	-0.70706	0.12546	-5.63573	1.74321e-08	1.04784e-07	-0.432362	0.129291	-3.34409	0.000825522	0.0033051	590.976	728.959	693.216	493.746	450.587	535.682	443.966	341.766	425.108
MSMEG_1569	0.777526	0.244447	0.312475	0.782291	0.434044	NA	0.162591	0.287196	0.566131	0.571305	NA	0	1.0296	0	1.16175	0	1.40969	1.56051	1.16247	0.673705
MSMEG_1570	307.662	-0.900003	0.135283	-6.65273	2.87697e-11	2.51352e-10	-0.480354	0.14062	-3.41598	0.000635527	0.00263599	366.307	441.7	434.091	300.894	268.35	311.541	247.731	176.695	221.649
MSMEG_1571	13.6062	0.129583	0.316154	0.409875	0.681898	0.765566	-0.0651767	0.342907	-0.190071	0.849254	0.907694	14.6523	11.3256	14.3959	13.9411	12.0156	11.2775	17.9459	15.1121	11.7898
MSMEG_1572	27.3979	0.416602	0.27819	1.49754	0.134252	0.213672	0.74806	0.292375	2.55857	0.0105105	0.0299454	14.6523	18.5328	23.2549	25.5586	36.0469	46.5198	31.2102	27.8992	22.906
MSMEG_1573	201.783	0.575024	0.182572	3.14958	0.00163506	0.0045212	0.327107	0.189663	1.72467	0.0845867	0.169846	161.175	159.588	160.569	233.513	172.224	202.995	298.448	173.208	254.324
MSMEG_1574	793.655	0.530449	0.0778971	6.80962	9.78602e-12	8.96711e-11	0.304269	0.083014	3.66528	0.000247071	0.00113119	672.377	611.584	656.673	773.728	811.056	814.801	942.94	914.862	944.872
MSMEG_1576	844.073	-0.254996	0.101402	-2.51471	0.011913	0.0269241	-0.119759	0.104528	-1.14571	0.251915	0.391179	923.094	958.56	878.148	795.802	913.189	834.536	797.812	671.906	823.605
MSMEG_1577	479	-0.497564	0.127895	-3.89041	0.000100076	0.000350668	-0.035262	0.131021	-0.269133	0.787827	0.867957	543.763	551.867	509.392	520.466	556.725	490.572	324.977	456.85	356.39
MSMEG_1578	166.066	0.0796464	0.195975	0.406412	0.68444	0.767629	-0.210186	0.20471	-1.02675	0.304539	0.44731	151.407	180.18	183.824	159.16	120.156	159.295	225.494	122.059	193.017
MSMEG_1581	304.803	-0.637251	0.109534	-5.81785	5.96101e-09	3.83208e-08	-0.199439	0.11597	-1.71975	0.0854772	0.171524	346.771	369.627	374.292	297.409	366.477	294.625	241.099	223.194	229.734
MSMEG_1584	20.8615	0.0232398	0.273738	0.0848978	0.932343	0.95487	-0.122648	0.302449	-0.405517	0.685098	0.792553	19.5364	19.5625	25.4696	24.3968	12.0156	19.7357	21.0669	24.4118	21.5586
MSMEG_1585	26.5564	0.129184	0.277423	0.465656	0.641462	0.732812	-0.000491441	0.298895	-0.00164419	0.998688	0.999541	22.7925	22.6513	32.1138	38.3379	22.0287	15.5066	32.3806	25.5743	27.6219
MSMEG_1586	20.3306	-0.312259	0.285369	-1.09423	0.273854	0.380064	0.116172	0.30336	0.382952	0.701756	0.805897	21.1644	25.7401	16.6106	17.4263	26.0339	28.1938	17.1656	12.7871	17.8532
MSMEG_1587	9.5617	0.516526	0.364766	1.41605	0.156762	0.242392	1.29907	0.371923	3.49284	0.000477911	0.00205086	3.25607	3.08881	5.53687	12.7793	20.0261	16.9163	6.24205	10.4622	7.74761
MSMEG_1588	4.57473	0.383153	0.387315	0.989254	0.322539	0.43273	-0.211755	0.392243	-0.539855	0.589297	0.720232	8.14016	3.08881	2.21475	2.32351	2.00261	4.22907	5.46179	6.97481	6.73705
MSMEG_1589	33.734	0.661846	0.273525	2.41969	0.0155338	0.0338497	1.55524	0.279463	5.5651	2.61995e-08	2.43467e-07	13.0243	22.6513	12.1811	61.573	42.0548	67.6651	28.8695	23.2494	32.3379
MSMEG_1590	1.87543	-0.179839	0.376515	-0.477642	0.632905	0.725469	-0.404753	0.355559	-1.13836	0.254972	0.394807	3.25607	4.11841	1.10737	0	0	2.81938	2.7309	1.16247	1.68426
MSMEG_1591	0.593043	0.179232	0.257555	0.695898	0.486493	NA	0.23407	0.242717	0.964371	0.33486	NA	0	0	0	1.16175	2.00261	0	0	1.16247	1.01056
MSMEG_1592	184.579	0.238484	0.144425	1.65127	0.0986836	0.165436	0.472085	0.152111	3.10356	0.0019121	0.00696757	175.828	141.056	145.066	198.66	254.331	197.357	166.585	201.107	181.227
MSMEG_1593	2.77618	-0.525896	0.378136	-1.39076	0.164299	0.251912	-0.512443	0.36533	-1.40269	0.160711	0.27874	1.62803	2.05921	11.0737	4.64702	0	0	2.7309	1.16247	1.68426
MSMEG_1594	331.92	0.493598	0.122342	4.03459	5.46987e-05	0.000200207	0.369575	0.129105	2.86259	0.00420194	0.013633	240.949	265.638	296.776	354.335	310.404	380.616	397.931	339.441	401.192
MSMEG_1595	8.65527	0.110395	0.349717	0.315671	0.752252	0.823854	-0.476859	0.375977	-1.26832	0.204684	0.336109	8.14016	14.4144	6.64424	5.80877	4.00522	7.04845	12.094	9.29974	10.4424
MSMEG_1596	48.9881	-0.399797	0.261054	-1.53147	0.125653	0.202288	0.00388298	0.270876	0.0143349	0.988563	0.994466	47.2129	58.6874	56.4761	52.2789	54.0704	57.7973	57.739	20.9244	35.7064
MSMEG_1597	100.015	-0.842226	0.164422	-5.12233	3.01778e-07	1.55018e-06	0.290608	0.16845	1.72519	0.0844935	0.169754	112.334	113.256	96.3415	115.014	158.206	129.691	56.5686	60.4483	58.2755
MSMEG_1598	126.033	0.927616	0.167964	5.52269	3.33848e-08	1.94277e-07	1.0151	0.177346	5.72386	1.0413e-08	1.01503e-07	68.3774	82.3682	69.7646	141.734	198.258	135.33	151.37	147.633	139.457
MSMEG_1599	1525.98	0.503035	0.125042	4.02293	5.74781e-05	0.000209562	0.838009	0.125983	6.65177	2.89583e-11	4.05664e-10	1276.38	1028.57	933.516	1804.2	2222.9	1848.1	1603.82	1485.63	1530.66
MSMEG_1600	1584.22	0.770501	0.0832825	9.25166	2.21042e-20	4.52413e-19	0.77946	0.0851924	9.14941	5.72439e-20	2.03293e-18	1193.35	1017.25	1004.39	1796.07	1912.49	1832.6	1852.72	1850.65	1798.46
MSMEG_1601	2394.81	-0.574925	0.0680895	-8.44367	3.07533e-17	4.76531e-16	-0.437991	0.0699486	-6.26161	3.81022e-10	4.61866e-09	2927.2	2988.94	3038.63	2290.98	2144.79	2154.01	1938.55	2121.5	1948.69
MSMEG_1603	1193.03	-0.462006	0.0733353	-6.2999	2.97828e-10	2.27263e-09	-0.736186	0.0781221	-9.42354	4.36134e-21	1.72615e-19	1471.74	1508.37	1644.45	921.271	925.205	919.118	1145.42	1090.39	1111.28
MSMEG_1604	1681.16	-0.189154	0.0877017	-2.15679	0.0310221	0.0618184	-0.348426	0.0900969	-3.86724	0.000110076	0.000547049	1987.83	1769.89	1930.15	1474.27	1584.06	1397	1607.33	1796.01	1583.88
MSMEG_1606	485.18	0.274782	0.106723	2.57471	0.0100323	0.0230544	0.404573	0.111323	3.63421	0.000278831	0.00126078	379.332	416.989	427.446	500.716	608.793	534.272	487.27	540.548	471.257
MSMEG_1607	35.5052	0.32463	0.247024	1.31416	0.188791	0.281324	0.777552	0.260122	2.98919	0.00279722	0.00962557	26.0485	29.8585	22.1475	58.0877	44.0574	40.881	35.5017	25.5743	37.3906
MSMEG_1608	755.347	-0.0217091	0.0817781	-0.265463	0.790653	0.85325	0.0680685	0.0861586	0.790037	0.429506	0.577539	691.914	774.261	766.303	750.493	823.072	782.378	725.638	754.442	729.623
MSMEG_1609	240.382	-0.0496676	0.115814	-0.428856	0.668028	0.753596	-0.0646872	0.125959	-0.513559	0.60756	0.732148	226.297	254.312	256.911	210.278	258.336	245.286	246.171	226.681	239.165
MSMEG_1611	586.53	-0.706493	0.0942479	-7.49611	6.57415e-14	7.67178e-13	-0.754402	0.100773	-7.48612	7.09408e-14	1.37487e-12	763.547	801.031	838.282	483.29	512.668	422.907	493.902	456.85	506.29
MSMEG_1612	148.293	-1.00427	0.138946	-7.22779	4.9091e-13	5.20206e-12	-0.19797	0.145823	-1.35761	0.174589	0.296702	183.968	205.921	174.965	161.484	186.243	148.017	97.9221	87.1851	88.9291
MSMEG_1613	42.418	-0.583432	0.21325	-2.7359	0.00622094	0.0150429	0.158611	0.226215	0.701152	0.483208	0.628649	48.841	47.3617	40.9728	46.4702	52.0678	56.3876	28.4793	32.5491	28.6325
MSMEG_1614	34.5207	-0.333098	0.261936	-1.27168	0.203488	0.299489	0.26974	0.273028	0.987959	0.323173	0.467058	30.9326	41.1841	31.0065	58.0877	26.0339	40.881	22.2373	33.7116	26.6114
MSMEG_1616	518.07	0.56044	0.108486	5.16603	2.39122e-07	1.24685e-06	0.875984	0.111847	7.83201	4.80125e-15	1.0621e-13	367.935	366.539	335.534	634.318	726.947	632.951	485.319	583.559	529.532
MSMEG_1617	1359.88	0.616343	0.0910853	6.76666	1.31792e-11	1.19266e-10	0.547674	0.0932934	5.87045	4.34622e-09	4.47565e-08	945.887	1044.02	1055.33	1480.07	1419.85	1580.26	1437.62	1675.12	1600.72
MSMEG_1618	2988.32	0.430743	0.132432	3.25257	0.00114365	0.00325837	0.219072	0.133196	1.64473	0.100026	0.193913	2503.91	2522.53	2589.04	2992.68	2969.87	2943.43	2867.83	4316.24	3189.32
MSMEG_1619	2.31829	0.0820078	0.383547	0.213814	0.830692	0.88295	0.354757	0.373714	0.949275	0.342481	0.488197	3.25607	1.0296	1.10737	3.48526	2.00261	4.22907	1.56051	1.16247	3.03167
MSMEG_1620	83.1242	-1.20818	0.181842	-6.64413	3.05007e-11	2.65768e-10	-0.65397	0.194285	-3.36603	0.000762575	0.00307936	94.4259	138.996	135.1	77.8375	68.0887	83.1717	56.9587	43.0113	50.5279
MSMEG_1621	494.246	0.280981	0.0897771	3.12977	0.00174944	0.00480109	0.222512	0.0961909	2.31323	0.0207098	0.0535261	437.941	449.936	426.339	492.584	518.676	528.634	556.323	502.186	535.596
MSMEG_1622	114.023	-0.7934	0.169539	-4.67974	2.87237e-06	1.29612e-05	-1.10988	0.189435	-5.8589	4.65936e-09	4.77566e-08	170.943	168.855	178.287	78.9993	62.0809	84.5814	110.796	68.5856	103.077
MSMEG_1623	57.5935	0.43186	0.192972	2.23794	0.0252251	0.0515167	0.118392	0.216554	0.54671	0.584578	0.716411	48.841	57.6578	42.0802	54.6024	62.0809	47.9294	65.1514	68.5856	71.4128
MSMEG_1624	5.00801	0.530841	0.387607	1.36953	0.170833	0.259777	-0.102835	0.392552	-0.261966	0.793348	0.870748	6.51213	3.08881	3.32212	4.64702	6.00782	0	7.41243	4.64987	9.43188
MSMEG_1625	10.9595	0.949421	0.357602	2.65497	0.00793162	0.0187112	0.383231	0.375848	1.01964	0.307897	0.450632	3.25607	10.296	4.4295	9.29403	10.013	9.86783	12.094	25.5743	13.811
MSMEG_1626	47.4036	0.174232	0.213945	0.814375	0.41543	0.52711	0.472793	0.229787	2.05752	0.0396358	0.0921795	37.4447	35.0065	45.4023	54.6024	54.0704	60.6167	40.5733	55.7985	43.1171
MSMEG_1627	22.2137	0.309451	0.270782	1.1428	0.25312	0.356585	-0.280816	0.30547	-0.919291	0.357944	0.504114	24.4205	21.6217	21.0401	16.2646	14.0183	21.1453	29.6497	19.762	32.001
MSMEG_1628	6.0729	0.525784	0.37888	1.38773	0.165218	0.252909	0.383775	0.38968	0.984848	0.324699	0.468851	6.51213	2.05921	4.4295	8.13228	6.00782	5.63876	6.63218	5.81234	9.43188
MSMEG_1629	758.147	-0.329632	0.103949	-3.1711	0.00151861	0.00423305	-0.160815	0.107294	-1.49883	0.133919	0.243186	923.094	780.439	837.175	774.89	769.002	718.942	656.586	749.792	613.409
MSMEG_1630	7.91222	0.689391	0.372961	1.84842	0.0645411	0.116174	0.881352	0.38292	2.30166	0.0213544	0.0549113	1.62803	8.23682	1.10737	10.4558	12.0156	11.2775	8.58282	8.13727	9.76873
MSMEG_1631	59.8769	-0.217214	0.198273	-1.09553	0.273284	0.379608	-0.186368	0.217326	-0.857549	0.391141	0.539328	52.097	68.9834	75.3014	53.4407	58.0756	62.0263	65.1514	54.636	49.1805
MSMEG_1632	167.602	-0.00831076	0.142158	-0.0584615	0.953381	0.969165	-0.0240243	0.153281	-0.156734	0.875455	0.927251	144.895	185.328	174.965	162.646	136.177	197.357	170.096	170.883	166.068
MSMEG_1634	498.762	0.0725572	0.139603	0.519739	0.603245	0.700853	0.318156	0.142582	2.23139	0.0256551	0.0638462	400.496	457.144	500.533	606.436	504.657	594.889	511.068	384.777	528.859
MSMEG_1635	1947.02	-0.449025	0.0720228	-6.23449	4.5326e-10	3.36108e-09	-0.078564	0.0736409	-1.06685	0.286039	0.427594	2140.86	2164.22	2233.57	2037.72	2116.76	2041.23	1486.78	1679.77	1622.28
MSMEG_1636	50.3171	0.336456	0.230447	1.46001	0.144287	0.226083	0.777059	0.241241	3.22109	0.00127703	0.00485255	27.6766	48.3913	32.1138	61.573	74.0965	67.6651	57.3488	39.5239	44.4646
MSMEG_1637	1181.56	0.0690785	0.082015	0.842267	0.399639	0.51112	0.439346	0.0840724	5.22581	1.73397e-07	1.4187e-06	936.119	1071.82	1105.16	1439.41	1399.82	1408.28	1125.52	1057.85	1090.06
MSMEG_1638	154.866	0.0857151	0.14847	0.577322	0.563722	0.665526	0.320742	0.157375	2.03807	0.0415434	0.0955003	117.218	147.233	155.032	192.851	148.193	187.489	155.271	132.521	157.984
MSMEG_1639	415.41	-0.385402	0.11893	-3.24058	0.00119288	0.00338249	0.107734	0.122617	0.87862	0.379607	0.527277	457.477	437.581	426.339	483.29	466.608	473.656	384.666	281.317	327.758
MSMEG_1640	1311.19	0.133175	0.116052	1.14754	0.251157	0.355077	0.117541	0.117877	0.997149	0.318692	0.4617	1289.4	1236.55	1173.82	1286.06	1389.81	1346.25	1213.3	1618.16	1247.37
MSMEG_1641	569.414	0.384969	0.0854333	4.50608	6.60364e-06	2.8009e-05	0.239356	0.0916413	2.61188	0.00900451	0.0262465	494.922	504.505	465.097	573.907	600.782	561.056	623.425	668.419	632.609
MSMEG_1642	6145.28	-0.394231	0.0626031	-6.2973	3.02877e-10	2.3058e-09	-0.243842	0.0633478	-3.84925	0.000118479	0.000585267	7021.7	7027.04	7192.39	6141.03	5919.71	5854.44	5171.15	5704.23	5275.79
MSMEG_1643	810.943	0.430576	0.161766	2.66172	0.00777424	0.0183729	0.00564984	0.164314	0.0343844	0.972571	0.984711	662.609	720.722	785.128	752.817	606.79	814.801	1105.62	734.68	1115.32
MSMEG_1644	71.3665	-0.038949	0.196601	-0.198112	0.842958	0.892112	-0.108054	0.213447	-0.506231	0.612694	0.736174	60.2372	85.457	76.4088	74.3523	74.0965	59.207	81.9269	53.4735	77.1393
MSMEG_1645	179.024	-0.539642	0.129722	-4.15999	3.18262e-05	0.000121994	-0.223878	0.139613	-1.60356	0.108811	0.207274	232.809	215.187	192.683	180.072	178.232	184.669	156.831	125.547	145.184
MSMEG_1646	25.493	0.651702	0.269144	2.42139	0.0154613	0.0337366	0.498302	0.292028	1.70635	0.0879435	0.175513	17.9084	18.5328	18.8254	27.8821	28.0365	28.1938	35.1115	20.9244	34.0221
MSMEG_1647	1256.77	-0.170089	0.0703639	-2.41727	0.0156374	0.0340404	-0.0983939	0.0736267	-1.33639	0.181422	0.306097	1330.1	1325.1	1352.1	1304.65	1257.64	1177.09	1169.21	1219.43	1175.62
MSMEG_1648	19.3557	-0.740388	0.284555	-2.60192	0.00927043	0.0215218	-0.0144368	0.300029	-0.048118	0.961622	0.978148	26.0485	20.5921	22.1475	20.9116	30.0391	18.326	12.8742	10.4622	12.8004
MSMEG_1649	47.3034	0.204014	0.238856	0.85413	0.393033	0.504539	0.226329	0.254417	0.889601	0.37368	0.521137	42.3288	46.3321	39.8655	65.0582	44.0574	42.2907	59.6896	32.5491	53.5596
MSMEG_1650	629.869	-0.514848	0.108164	-4.75986	1.93726e-06	8.95061e-06	-0.0308525	0.111005	-0.277937	0.78106	0.862593	675.634	715.574	722.008	672.656	702.915	696.387	434.213	570.772	478.668
MSMEG_1652	1410.5	-0.48226	0.119514	-4.03518	5.45609e-05	0.000199925	0.520721	0.119903	4.34287	1.40634e-05	8.28671e-05	1331.73	1303.48	1379.79	1959.88	2124.77	1731.1	849.699	1121.78	892.323
MSMEG_1653	162.34	-1.01865	0.149756	-6.8021	1.03108e-11	9.40861e-11	0.0575388	0.152887	0.376347	0.706659	0.809149	203.504	195.625	180.502	205.63	232.303	169.163	104.554	82.5352	87.2448
MSMEG_1654	9891.81	-0.816156	0.138939	-5.87421	4.24871e-09	2.78583e-08	-0.833691	0.139192	-5.98951	2.10469e-09	2.25944e-08	15100	13634	13497.8	7583.93	8266.77	7393.82	6494.46	9849.59	7205.95
MSMEG_1655	142.478	0.137621	0.144743	0.950791	0.341711	0.453086	0.29722	0.15548	1.91163	0.0559236	0.121904	125.359	119.434	138.422	154.513	186.243	139.559	143.177	126.709	148.889
MSMEG_1658	3054.86	0.490793	0.069233	7.08901	1.35076e-12	1.37589e-11	0.115748	0.0709767	1.63079	0.102935	0.198324	2679.74	2579.15	2618.94	2820.74	2685.5	3023.78	3782.29	3549.01	3754.56
MSMEG_1659	92.6704	-0.125213	0.171144	-0.731626	0.464397	0.574625	-0.112253	0.186802	-0.600919	0.547894	0.684867	100.938	108.108	84.1604	77.8375	116.151	81.762	88.5591	82.5352	93.9819
MSMEG_1660	768.574	0.631631	0.110424	5.72008	1.06477e-08	6.59332e-08	0.496862	0.113719	4.36922	1.24691e-05	7.40039e-05	533.995	607.466	593.553	859.698	859.119	755.594	970.639	785.828	951.272
MSMEG_1661	935.545	-0.124016	0.0947122	-1.3094	0.190398	0.283077	-0.345123	0.0987662	-3.49434	0.000475238	0.00204206	1022.4	999.744	1098.52	819.037	849.106	782.378	1038.13	853.251	957.335
MSMEG_1662	654.415	-1.14551	0.353115	-3.244	0.00117863	0.00334497	-1.0215	0.353509	-2.88961	0.00385726	0.0126965	999.612	1231.4	1204.82	234.674	819.067	249.515	366.33	418.488	365.822
MSMEG_1663	154.688	-1.08889	0.385663	-2.82342	0.00475138	0.0118021	-0.433018	0.385882	-1.12215	0.261798	0.402154	195.364	267.697	270.199	65.0582	328.428	63.436	67.102	70.9105	64.002
MSMEG_1664	9.60077	-0.7466	0.347838	-2.1464	0.0318411	0.0632202	-0.223711	0.362792	-0.616637	0.537474	0.675498	6.51213	14.4144	15.5032	10.4558	14.0183	7.04845	6.24205	5.81234	6.4002
MSMEG_1665	491.525	-1.427	0.21115	-6.75821	1.39711e-11	1.25757e-10	-1.41854	0.214489	-6.61359	3.75121e-11	5.18852e-10	735.871	934.879	947.912	217.248	458.597	234.008	312.883	267.368	314.957
MSMEG_1666	340.705	-0.883141	0.210806	-4.18936	2.79748e-05	0.000108369	-1.01378	0.215268	-4.70941	2.48437e-06	1.69494e-05	490.038	539.512	514.929	178.91	370.483	179.031	302.739	231.331	259.377
MSMEG_1667	158.909	-0.0969514	0.149631	-0.647936	0.517026	0.624194	0.00086965	0.159906	0.0054385	0.995661	0.998548	162.803	170.914	150.603	162.646	166.216	156.476	127.962	183.67	148.889
MSMEG_1668	58.2185	-0.0917716	0.20871	-0.439708	0.660148	0.74663	-0.565689	0.234266	-2.41473	0.0157469	0.0423831	56.9811	70.013	73.0867	32.5291	60.0782	42.2907	71.0033	65.0982	52.8859
MSMEG_1671	725.783	-0.380613	0.110119	-3.45636	0.000547521	0.00167859	-0.188441	0.113354	-1.66242	0.0964288	0.188273	831.925	857.659	779.591	638.965	851.109	683.699	599.627	652.144	637.325
MSMEG_1674	0.97162	-0.061069	0.335636	-0.18195	0.855622	NA	-0.0604001	0.30901	-0.195463	0.84503	NA	0	2.05921	1.10737	1.16175	0	1.40969	1.17038	1.16247	0.673705
MSMEG_1678	244.972	0.471356	0.127084	3.70901	0.00020807	0.000689369	0.220538	0.13683	1.61176	0.107014	0.204623	219.784	204.891	191.576	246.292	244.318	228.37	266.067	333.628	269.819
MSMEG_1679	1825.32	0.786911	0.148819	5.28771	1.23857e-07	6.71956e-07	-0.0388046	0.150432	-0.257955	0.796442	0.87254	1577.56	1461.01	1358.75	1413.85	1431.86	1428.02	2112.54	3322.33	2321.93
MSMEG_1680	1214.93	0.904022	0.156139	5.78986	7.04435e-09	4.49334e-08	-0.138502	0.158722	-0.872606	0.382878	0.530922	1050.08	931.79	874.826	884.095	875.14	821.849	1496.14	2373.76	1626.66
MSMEG_1681	1022.39	0.647671	0.132488	4.88854	1.01586e-06	4.85749e-06	-0.197653	0.135932	-1.45407	0.145928	0.259121	970.307	867.955	822.779	755.14	805.049	748.545	1195.74	1711.15	1324.84
MSMEG_1682	1280.91	0.912646	0.159773	5.71213	1.11571e-08	6.87637e-08	-0.0833788	0.162072	-0.514456	0.606933	0.731661	1103.81	907.08	961.201	888.742	949.236	957.179	1530.86	2496.98	1733.11
MSMEG_1683	1453.13	0.505875	0.108555	4.66006	3.16118e-06	1.41478e-05	-0.128065	0.11127	-1.15094	0.249756	0.389023	1331.73	1290.09	1287.88	1227.97	1169.52	1170.04	1592.11	2138.94	1869.87
MSMEG_1684	1753.73	-0.571346	0.0803677	-7.10914	1.16767e-12	1.19495e-11	-0.478412	0.0825856	-5.79293	6.91689e-09	6.88545e-08	2209.24	2127.16	2278.98	1593.93	1479.93	1649.34	1398.61	1594.91	1451.5
MSMEG_1685	2.66988	0.674339	0.38673	1.74369	0.0812124	0.14082	0.686143	0.379139	1.80974	0.0703363	0.146562	0	1.0296	1.10737	4.64702	4.00522	2.81938	3.90128	3.4874	3.03167
MSMEG_1686	17.1077	0.514576	0.309896	1.66048	0.0968176	0.16285	0.558477	0.329291	1.696	0.0898859	0.178414	14.6523	10.296	12.1811	18.5881	14.0183	26.7841	23.0176	18.5995	15.8321
MSMEG_1687	4.04726	1.05795	0.390057	2.71229	0.0066821	0.0160634	0.857156	0.387825	2.21016	0.0270939	0.0669213	0	1.0296	1.10737	6.97053	6.00782	2.81938	8.97295	5.81234	3.70538
MSMEG_1688	4.37216	0.967761	0.389513	2.48454	0.0129718	0.0290671	0.624404	0.391688	1.59413	0.110906	0.210167	1.62803	3.08881	0	4.64702	6.00782	4.22907	5.85192	5.81234	8.08446
MSMEG_1689	9.31825	0.949013	0.357276	2.65625	0.00790159	0.0186538	0.850635	0.373741	2.276	0.0228458	0.0581095	3.25607	3.08881	6.64424	13.9411	10.013	9.86783	11.3137	13.9496	11.7898
MSMEG_1690	6.2397	0.213213	0.377413	0.564932	0.57212	0.673263	0.448375	0.387044	1.15846	0.246677	0.385323	4.8841	5.14801	4.4295	8.13228	8.01043	8.45814	7.02231	2.32494	7.74761
MSMEG_1691	12.5306	0.797347	0.334378	2.38457	0.0170993	0.0368214	0.790491	0.352716	2.24115	0.0250161	0.0626118	6.51213	6.17762	8.85899	18.5881	14.0183	14.0969	17.5558	10.4622	16.5058
MSMEG_1692	43.3509	0.338608	0.239247	1.41531	0.156978	0.242623	0.0485159	0.260116	0.186517	0.85204	0.909932	40.7008	41.1841	36.5433	49.9554	46.06	26.7841	54.6179	36.0365	58.2755
MSMEG_1693	145.444	0.629819	0.14788	4.25898	2.05365e-05	8.12798e-05	0.664312	0.158294	4.1967	2.70827e-05	0.000151562	89.5418	119.434	100.771	185.881	160.209	157.885	152.93	170.883	171.458
MSMEG_1695	1117.92	0.988764	0.0862579	11.4629	2.0267e-30	8.16898e-29	0.137072	0.0910504	1.50546	0.132207	0.240742	833.553	745.432	877.04	931.727	837.09	924.756	1643.61	1664.65	1603.42
MSMEG_1696	34.2339	0.113219	0.255378	0.443339	0.657521	0.74513	0.181483	0.273731	0.662998	0.507332	0.649994	35.8167	33.9769	25.4696	45.3084	26.0339	35.2422	26.5287	43.0113	36.7169
MSMEG_1697	7.47697	0.318775	0.368977	0.863941	0.38762	0.500032	-0.13781	0.385482	-0.357502	0.720716	0.818373	11.3962	6.17762	4.4295	3.48526	6.00782	8.45814	12.094	5.81234	9.43188
MSMEG_1698	198.81	0.355292	0.140208	2.53403	0.011276	0.0256787	-0.202086	0.153586	-1.31579	0.188246	0.314461	188.852	177.092	204.864	170.778	150.196	169.163	281.282	209.244	237.818
MSMEG_1699	12.3153	-0.177287	0.330248	-0.536831	0.591384	0.690368	0.168408	0.347862	0.484124	0.628298	0.750121	9.7682	10.296	15.5032	13.9411	16.0209	12.6872	10.9236	13.9496	7.74761
MSMEG_1700	30.1753	-0.0718297	0.244576	-0.293691	0.768994	0.836621	-0.0133237	0.268321	-0.0496557	0.960397	0.977053	37.4447	27.7993	28.7917	27.8821	30.0391	33.8326	26.5287	25.5743	33.6853
MSMEG_1701	121.704	-0.117612	0.227396	-0.517213	0.605008	0.701783	-0.665449	0.238998	-2.78433	0.00536392	0.0168375	126.987	142.085	170.536	105.72	48.0626	104.317	157.612	94.1599	145.857
MSMEG_1702	1274.12	0.340186	0.104406	3.2583	0.0011208	0.0032016	0.050144	0.106965	0.468788	0.639221	0.758191	1203.12	1075.93	1193.75	1222.17	1221.59	1151.72	1637.76	1277.55	1483.5
MSMEG_1703	841.074	0.480802	0.138042	3.48303	0.000495779	0.00153428	-0.184937	0.141631	-1.30577	0.191631	0.319139	722.846	774.261	808.383	652.906	690.9	678.061	1255.43	833.489	1153.38
MSMEG_1704	87.0944	0.139542	0.180772	0.77192	0.440162	0.550936	0.559939	0.190963	2.93218	0.0033659	0.0112826	81.4016	75.161	58.6908	101.073	120.156	104.317	71.7836	96.4848	74.7813
MSMEG_1705	56.5171	0.446001	0.210875	2.115	0.0344298	0.0677054	0.866236	0.222635	3.89083	9.99038e-05	0.000499804	43.9569	30.8881	42.0802	68.5435	78.1017	77.5329	49.9364	67.4231	50.191
MSMEG_1706	43.548	0.307772	0.206539	1.49014	0.136187	0.216122	0.0139542	0.234322	0.0595513	0.952513	0.973858	40.7008	43.2433	35.436	39.4996	42.0548	39.4713	49.5463	53.4735	48.5068
MSMEG_1707	85.5471	0.0994974	0.202815	0.490582	0.623722	0.71716	-0.169575	0.218078	-0.777588	0.436812	0.584135	89.5418	81.3386	93.0194	85.9698	44.0574	95.8589	108.456	79.0478	92.6345
MSMEG_1708	126.484	-0.0636566	0.154118	-0.413038	0.679579	0.763741	-0.0575789	0.167403	-0.343955	0.73088	0.826606	164.431	111.197	118.489	115.014	132.172	126.872	123.671	123.222	123.288
MSMEG_1709	2.1021	0.628066	0.378879	1.65769	0.0973791	0.163585	-0.0398366	0.356648	-0.111697	0.911064	0.948303	1.62803	0	2.21475	1.16175	2.00261	0	2.7309	5.81234	3.36853
MSMEG_1710	1.32243	0.256832	0.321059	0.799952	0.423739	NA	-0.0390653	0.301817	-0.129434	0.897014	NA	0	3.08881	0	2.32351	0	0	3.12102	0	3.36853
MSMEG_1711	2.24291	-0.509557	0.382392	-1.33255	0.182679	0.274332	-0.390175	0.365842	-1.06651	0.286192	0.427678	4.8841	2.05921	3.32212	0	4.00522	1.40969	1.17038	2.32494	1.01056
MSMEG_1712	1.171	0.171438	0.347165	0.493822	0.621432	NA	0.150004	0.323445	0.46377	0.642813	NA	1.62803	0	1.10737	2.32351	0	1.40969	1.56051	1.16247	1.34741
MSMEG_1714	1.49702	0.253324	0.356103	0.711378	0.47685	NA	0.0702458	0.334931	0.209732	0.833877	NA	0	3.08881	0	1.16175	0	2.81938	2.7309	2.32494	1.34741
MSMEG_1716	24.1694	0.781891	0.274752	2.84581	0.00442986	0.0110831	0.738303	0.295672	2.49703	0.0125237	0.0347241	9.7682	18.5328	16.6106	30.2056	28.0365	28.1938	31.6004	23.2494	31.3273
MSMEG_1717	31.8636	0.477148	0.259606	1.83797	0.0660673	0.118402	0.653368	0.276375	2.36406	0.0180759	0.0478672	22.7925	19.5625	25.4696	37.1761	42.0548	36.6519	25.3583	43.0113	34.6958
MSMEG_1718	19.2706	0.952827	0.29338	3.24776	0.00116316	0.00330632	0.637619	0.318617	2.00121	0.0453696	0.102821	11.3962	9.26642	14.3959	23.2351	18.0235	19.7357	28.8695	23.2494	25.264
MSMEG_1719	17.7951	-0.181465	0.296408	-0.612212	0.540397	0.645294	0.362702	0.312837	1.1594	0.246294	0.385	17.9084	16.4736	14.3959	18.5881	28.0365	21.1453	14.0446	17.437	12.1267
MSMEG_1720	4.35043	-0.298625	0.388967	-0.767739	0.442642	0.553513	0.0211386	0.392698	0.0538291	0.957071	0.975386	3.25607	5.14801	5.53687	3.48526	8.01043	4.22907	3.12102	2.32494	4.04223
MSMEG_1721	84.7123	-0.632721	0.193032	-3.2778	0.0010462	0.0030081	0.0235337	0.201296	0.11691	0.906931	0.946536	109.078	108.108	73.0867	91.7786	110.143	94.4492	67.102	45.3362	63.3283
MSMEG_1722	105.715	0.418089	0.206134	2.02824	0.042536	0.0812861	0.112701	0.218101	0.516739	0.605338	0.730733	92.7979	95.7531	84.1604	97.5874	112.146	88.8104	90.5097	167.395	122.278
MSMEG_1723	67.0104	0.288963	0.201786	1.43203	0.152136	0.23624	0.67676	0.212862	3.17934	0.00147612	0.00551655	45.5849	43.2433	64.2277	75.514	84.1095	97.2686	56.1784	68.5856	68.3811
MSMEG_1724	55.1254	-0.807422	0.212562	-3.79853	0.000145559	0.00049397	-0.138342	0.223782	-0.6182	0.536443	0.674915	74.8895	70.013	59.7982	51.1172	48.0626	83.1717	37.4523	32.5491	39.0749
MSMEG_1725	1.82176	0.582928	0.361727	1.61151	0.107068	0.17701	0.816022	0.347865	2.3458	0.0189863	0.0498561	0	0	0	3.48526	2.00261	4.22907	1.17038	3.4874	2.02112
MSMEG_1726	64.6402	0.0418949	0.196479	0.213228	0.831149	0.88295	-0.25618	0.218538	-1.17224	0.241099	0.378409	63.4933	72.0722	65.3351	54.6024	62.0809	50.7488	56.1784	87.1851	70.0654
MSMEG_1727	2.87488	0.0123291	0.385979	0.0319425	0.974518	0.982546	0.310932	0.378395	0.821714	0.41124	0.559341	6.51213	0	1.10737	3.48526	4.00522	4.22907	2.34077	1.16247	3.03167
MSMEG_1728	37.6081	-0.227376	0.226432	-1.00417	0.315298	0.424489	0.231778	0.242994	0.953844	0.340162	0.485841	45.5849	36.0361	31.0065	47.6319	38.0496	45.1101	31.2102	34.874	28.9693
MSMEG_1729	16.8848	0.343369	0.30387	1.12999	0.258482	0.362714	0.168832	0.328171	0.514465	0.606927	0.731661	13.0243	17.5032	13.2885	23.2351	16.0209	11.2775	22.6274	15.1121	19.8743
MSMEG_1730	3.41807	0.0649081	0.389687	0.166565	0.867713	0.908361	0.0941871	0.382889	0.24599	0.80569	0.878861	6.51213	2.05921	1.10737	0	4.00522	7.04845	3.51115	3.4874	3.03167
MSMEG_1731	21.2707	0.429535	0.301816	1.42317	0.154687	0.239522	0.181335	0.323331	0.560832	0.574912	0.707468	22.7925	17.5032	13.2885	12.7793	20.0261	29.6035	30.8201	24.4118	20.2112
MSMEG_1732	6.92019	-0.389947	0.374471	-1.04133	0.297724	0.406156	-0.383185	0.386653	-0.99103	0.321671	0.465259	8.14016	6.17762	12.1811	8.13228	4.00522	4.22907	3.90128	10.4622	5.05279
MSMEG_1733	38.0948	-0.631744	0.228977	-2.75899	0.00579806	0.01414	0.226756	0.239844	0.945429	0.34444	0.490458	45.5849	41.1841	34.3286	42.9849	52.0678	49.3391	23.4077	31.3866	22.5691
MSMEG_1734	512.884	-0.951203	0.123507	-7.7016	1.34374e-14	1.66259e-13	-0.578994	0.127375	-4.54559	5.4782e-06	3.49096e-05	646.329	762.936	708.719	473.996	484.631	448.281	345.653	430.113	315.294
MSMEG_1735	1517.82	-0.237654	0.129313	-1.83782	0.0660893	0.118409	-0.303447	0.130892	-2.31829	0.0204333	0.0529783	1452.21	1715.32	1988.84	1390.62	1309.71	1454.8	1578.07	1241.52	1529.31
MSMEG_1736	5721.52	0.40497	0.0716274	5.65385	1.56897e-08	9.49186e-08	0.22036	0.0724153	3.04301	0.00234226	0.0082913	4561.75	4933.86	5235.66	5848.27	5565.25	5776.91	6469.88	6755.1	6346.98
MSMEG_1737	1439.28	0.412586	0.0756792	5.45178	4.98688e-08	2.83914e-07	0.270584	0.0784874	3.44749	0.000565821	0.00238603	1175.44	1301.42	1174.92	1470.78	1536	1418.15	1676.38	1590.26	1610.16
MSMEG_1738	3441.68	0.0665873	0.075808	0.878367	0.379744	0.492775	-0.189746	0.0772112	-2.4575	0.013991	0.0382524	3492.13	3474.91	3632.19	2956.66	3059.99	3266.25	3919.62	3444.39	3728.96
MSMEG_1739	559.024	-0.208716	0.112701	-1.85195	0.0640333	0.115355	0.592499	0.114463	5.17634	2.26285e-07	1.81525e-06	468.873	553.926	458.453	753.978	839.093	672.422	415.486	445.225	423.761
MSMEG_1740	176.418	0.401825	0.147133	2.73103	0.0063136	0.0152389	0.474554	0.155783	3.04625	0.00231718	0.00821578	110.706	166.796	143.959	209.116	194.253	197.357	193.894	168.558	203.122
MSMEG_1741	1425.04	-0.858946	0.118544	-7.2458	4.29902e-13	4.63026e-12	-0.0266694	0.119221	-0.223698	0.822992	0.891078	1584.08	1814.16	1672.13	1625.29	1878.45	1482.99	837.215	1053.2	877.838
MSMEG_1742	8328.72	0.594474	0.100581	5.91039	3.41301e-09	2.26958e-08	0.815756	0.100829	8.09051	5.94157e-16	1.44578e-14	5869.06	5735.92	5832.54	10386.1	10643.9	9962.28	7653.14	10097.2	8778.38
MSMEG_1743	12442.8	0.404444	0.177601	2.27726	0.0227709	0.0471507	0.914609	0.17766	5.14809	2.63159e-07	2.07807e-06	9162.57	8592.03	8287.59	16744.4	18426	15730.7	8646.02	16074.6	10321.2
MSMEG_1744	84.7996	0.0613519	0.189286	0.324122	0.745846	0.818748	-0.399458	0.209487	-1.90685	0.0565407	0.123167	113.962	70.013	91.912	72.0288	56.073	70.4845	89.7295	112.759	86.2343
MSMEG_1745	43.2982	0.0112028	0.230929	0.0485119	0.961308	0.974955	-0.0277217	0.250943	-0.11047	0.912037	0.948865	29.3046	40.1545	58.6908	36.0144	52.0678	42.2907	47.2055	41.8488	42.1066
MSMEG_1746	94.9039	0.788497	0.23979	3.28828	0.001008	0.00290765	2.36513	0.238654	9.91025	3.75698e-23	1.7023e-21	22.7925	23.6809	45.4023	171.94	230.3	180.44	45.645	68.5856	65.3494
MSMEG_1747	31.6889	0.097674	0.277744	0.35167	0.725086	0.801854	1.33297	0.280595	4.75053	2.0288e-06	1.412e-05	16.2803	16.4736	22.1475	49.9554	72.0939	43.7004	16.7755	27.8992	19.8743
MSMEG_1748	8.80034	0.348502	0.360209	0.967499	0.333295	0.443808	0.798929	0.371756	2.14907	0.0316291	0.076286	3.25607	7.20722	5.53687	15.1028	10.013	12.6872	9.36307	9.29974	6.73705
MSMEG_1749	274.743	-0.449114	0.112	-4.00995	6.07305e-05	0.00022032	0.279653	0.116621	2.39797	0.0164863	0.0441921	276.766	269.756	287.917	326.453	364.475	331.277	193.504	227.844	194.701
MSMEG_1750	6.41317	-0.482797	0.376925	-1.28088	0.200235	0.295628	0.278297	0.384048	0.724641	0.468672	0.615725	6.51213	4.11841	8.85899	6.97053	10.013	9.86783	3.51115	3.4874	4.37908
MSMEG_1751	726.017	0.960453	0.112469	8.53968	1.34593e-17	2.1463e-16	2.22819	0.112621	19.7849	4.01683e-87	3.77008e-84	307.698	249.164	281.273	1254.69	1451.89	1334.98	505.996	583.559	564.902
MSMEG_1752	3.67451	-0.0633952	0.387077	-0.163779	0.869905	0.909967	0.423667	0.382511	1.1076	0.268037	0.40887	1.62803	6.17762	0	3.48526	10.013	4.22907	1.17038	2.32494	4.04223
MSMEG_1754	155.008	0.537829	0.15586	3.45073	0.00055908	0.00170742	1.06795	0.161633	6.60726	3.91485e-11	5.40348e-10	120.474	105.019	77.5162	231.189	194.253	219.912	142.787	160.421	143.499
MSMEG_1755	203.198	-0.598498	0.123084	-4.86252	1.15901e-06	5.50193e-06	-0.364871	0.133364	-2.73591	0.0062209	0.0191115	283.278	242.986	231.441	183.557	210.274	190.308	166.195	149.958	170.784
MSMEG_1756	335.852	0.231601	0.147889	1.56604	0.117339	0.19101	0.595008	0.151435	3.92912	8.52565e-05	0.000432203	271.881	251.223	286.81	415.908	418.545	408.81	279.332	406.864	283.293
MSMEG_1757	4246.28	0.272462	0.0827036	3.29444	0.000986191	0.00284928	0.251328	0.083512	3.00948	0.00261692	0.00908681	3361.89	3785.85	4077.35	4557.56	4295.59	4542.02	4551.62	4424.35	4620.27
MSMEG_1758	262.225	0.368131	0.152623	2.41204	0.0158637	0.0344658	-0.0298505	0.160831	-0.185602	0.852757	0.910106	229.553	231.661	261.34	242.807	184.24	274.889	343.313	258.068	334.158
MSMEG_1759	98.637	0.631005	0.160678	3.92714	8.59636e-05	0.000304136	0.10698	0.181095	0.590736	0.554698	0.690351	81.4016	71.0426	90.8047	88.2933	74.0965	97.2686	119.769	133.684	131.373
MSMEG_1760	1175.51	0.154091	0.122973	1.25305	0.210189	0.307081	0.01894	0.125067	0.151439	0.879629	0.929724	1081.01	1126.39	1178.25	1258.18	1001.3	1165.81	1409.14	1055.52	1303.96
MSMEG_1761	229.21	0.822333	0.134385	6.11923	9.40257e-10	6.64961e-09	0.442333	0.144466	3.06183	0.00219985	0.0078763	185.596	168.855	140.637	197.498	248.323	235.418	308.591	301.079	276.893
MSMEG_1762	3172.5	0.279601	0.118353	2.36242	0.0181559	0.0388548	0.0745884	0.1192	0.625744	0.531483	0.670863	2949.99	2896.27	2879.17	3581.69	2479.23	3123.87	3502.57	3679.21	3460.49
MSMEG_1763	161.937	0.919389	0.1499	6.13333	8.60558e-10	6.10569e-09	0.367692	0.163591	2.24763	0.0245999	0.0616877	117.218	98.8419	126.241	149.866	144.188	150.837	207.548	259.23	203.459
MSMEG_1764	4123.21	0.223781	0.139574	1.60331	0.108866	0.179305	-0.62581	0.140468	-4.45517	8.38249e-06	5.19556e-05	4659.43	4494.22	4047.45	3197.15	2096.73	3121.05	5138.38	5124.16	5230.31
MSMEG_1765	25.6306	0.0736611	0.281495	0.261678	0.79357	0.855734	-0.474764	0.309473	-1.53411	0.125003	0.230565	29.3046	25.7401	32.1138	23.2351	4.00522	26.7841	31.2102	23.2494	35.0327
MSMEG_1766	1758.06	0.135793	0.0986289	1.3768	0.168573	0.256769	-0.255019	0.100878	-2.52799	0.0114717	0.0321679	1701.29	1836.81	1854.85	1505.63	1397.82	1600	1967.81	1768.11	2190.22
MSMEG_1767	1918.59	0.250941	0.107201	2.34085	0.0192401	0.0408161	-0.138249	0.10903	-1.26799	0.204803	0.336221	1706.18	1802.83	2060.82	1733.34	1465.91	1846.69	2334.92	2122.67	2193.92
MSMEG_1768	3683.38	0.078039	0.0717897	1.08705	0.277015	0.383352	-0.216747	0.0732208	-2.96018	0.00307458	0.010407	3816.11	3598.46	3957.75	3211.09	3330.34	3233.83	4256.69	3896.59	3849.55
MSMEG_1769	2549.55	-0.37751	0.0923097	-4.0896	4.32119e-05	0.00016186	-0.545625	0.0938999	-5.81071	6.22083e-09	6.21422e-08	3347.23	2979.67	3041.96	2076.05	2248.93	2059.56	2383.29	2629.5	2179.77
MSMEG_1770	21107.8	0.314556	0.120791	2.60412	0.00921096	0.0214216	0.578332	0.120871	4.78472	1.71225e-06	1.20702e-05	15653.5	17095.5	17787.7	24015.8	27249.5	24958.6	18449.5	25205.8	19554.6
MSMEG_1771	9205.18	0.113443	0.0782772	1.44925	0.147268	0.229822	0.428941	0.0785682	5.45947	4.77556e-08	4.298e-07	7373.36	8194.61	8554.46	10799.7	10728	11057.6	8377.61	9273.01	8488.35
MSMEG_1772	2242.97	0.290586	0.134262	2.16432	0.0304396	0.0608421	0.289017	0.135117	2.13902	0.0324343	0.077999	1859.21	1996.4	1973.34	2402.51	2274.96	2489.51	1989.65	2980.57	2220.53
MSMEG_1773	23228.4	0.225528	0.122672	1.83847	0.0659935	0.118367	0.47756	0.122745	3.89069	9.99608e-05	0.000499804	19562.4	19158.8	19699.1	27696.2	28174.7	26168.1	19443.2	27941.1	21211.6
MSMEG_1774	11751.2	0.361987	0.104333	3.46954	0.000521351	0.00160284	0.307716	0.104562	2.94291	0.00325148	0.010927	10285.9	9577.36	10062.7	12591.1	12354.1	12237.5	11573.1	15116.7	11962
MSMEG_1775	1099.85	-0.291056	0.0950298	-3.06279	0.00219284	0.0059142	-0.173933	0.0976836	-1.78057	0.0749822	0.154382	1121.71	1164.48	1378.68	1061.84	1085.41	1100.97	1044.76	949.736	991.021
MSMEG_1776	246.473	-0.539165	0.10852	-4.96833	6.7532e-07	3.32349e-06	-0.330572	0.118423	-2.79145	0.00524721	0.0165185	320.722	297.555	282.38	245.13	216.282	243.876	199.355	203.432	209.522
MSMEG_1777	4260.48	0.353192	0.139244	2.5365	0.0111966	0.0255156	0.317094	0.139683	2.27011	0.0232011	0.0588309	3549.11	3515.06	3752.89	4307.78	4798.25	4474.35	4003.1	5899.52	4044.25
MSMEG_1778	25.8827	0.033582	0.279292	0.120239	0.904293	0.935329	-0.18289	0.302662	-0.604272	0.545663	0.682598	26.0485	28.8289	26.577	20.9116	24.0313	25.3744	21.8472	20.9244	38.4012
MSMEG_1779	42.2098	0.299396	0.219267	1.36544	0.172116	0.261457	0.211086	0.241791	0.873008	0.382659	0.53073	35.8167	32.9473	40.9728	37.1761	56.073	39.4713	42.9141	45.3362	49.1805
MSMEG_1780	1122.89	0.301178	0.123091	2.4468	0.0144132	0.0317661	0.416806	0.124781	3.3403	0.000836871	0.00334037	796.108	1028.57	993.315	1284.9	1213.58	1299.73	1225.78	992.747	1271.28
MSMEG_1781	1571.31	0.702161	0.1278	5.49421	3.92467e-08	2.26582e-07	0.507211	0.12922	3.92517	8.66695e-05	0.000438689	963.795	1221.11	1274.59	1668.28	1604.09	1702.91	1999.02	1607.69	2100.28
MSMEG_1782	10921.6	0.164864	0.129726	1.27086	0.203778	0.299714	0.441253	0.129868	3.3977	0.000679556	0.00278694	9366.07	9120.22	9636.37	12813	13171.2	12540.6	8994.4	13160.3	9492.51
MSMEG_1783	2067.16	-0.0766771	0.0886486	-0.864956	0.387063	0.49962	0.549673	0.0894371	6.14592	7.95018e-10	9.08395e-09	1849.44	1735.91	1853.74	2735.93	2651.45	2609.34	1658.82	1923.88	1585.9
MSMEG_1784	460.508	0.249101	0.11066	2.25105	0.0243827	0.050045	0.458007	0.114985	3.98318	6.79983e-05	0.000351218	348.399	369.627	435.198	513.495	564.736	527.224	425.24	489.399	471.257
MSMEG_1785	42.2374	0.0929334	0.212823	0.436671	0.66235	0.748991	0.406687	0.2307	1.76284	0.0779282	0.15925	42.3288	36.0361	33.2212	51.1172	48.0626	50.7488	39.0128	39.5239	40.0855
MSMEG_1786	651.862	-1.21741	0.295078	-4.12571	3.69586e-05	0.000139872	-0.225328	0.295287	-0.763083	0.445414	0.593196	895.418	958.56	821.672	694.729	825.075	702.025	199.746	521.948	247.587
MSMEG_1787	4737.42	0.78884	0.089412	8.82252	1.11909e-18	1.96588e-17	0.825175	0.0899886	9.16977	4.74018e-20	1.7091e-18	3010.23	3110.43	3301.08	5618.24	5469.12	5738.85	5966.62	4859.12	5563.12
MSMEG_1788	6972.12	0.663348	0.0718946	9.22668	2.79155e-20	5.64322e-19	0.778262	0.0723651	10.7547	5.63389e-27	3.81594e-25	4752.23	4761.91	5027.48	8133.44	8761.41	8174.79	7260.28	8179.12	7698.43
MSMEG_1789	5168.67	0.593012	0.140556	4.21906	2.45328e-05	9.58267e-05	0.688547	0.140858	4.88822	1.01753e-06	7.38694e-06	3654.93	3767.32	3732.96	5833.17	6534.51	5913.65	4700.26	7218.92	5162.27
MSMEG_1790	8867.12	0.583674	0.074559	7.82835	4.94309e-15	6.30604e-14	0.765366	0.0748964	10.219	1.63038e-24	8.43433e-23	6093.73	6367.06	6479.25	10204.8	11503	10665.7	9246.04	9167.22	10077.3
MSMEG_1791	1467.95	0.283883	0.131164	2.16433	0.0304391	0.0608421	0.693235	0.132042	5.25012	1.52002e-07	1.25617e-06	1151.02	1139.77	1122.88	1719.4	2068.69	1817.09	1162.19	1679.77	1350.78
MSMEG_1792	612.853	0.591866	0.119312	4.96067	7.02503e-07	3.43923e-06	-0.276178	0.125856	-2.1944	0.0282065	0.0692513	573.067	509.653	573.62	501.878	402.524	446.872	937.868	738.167	832.026
MSMEG_1793	91.3182	0.725001	0.194505	3.72742	0.000193448	0.000643521	0.310794	0.21007	1.47948	0.139013	0.250086	83.0297	58.6874	65.3351	82.4845	82.1069	93.0395	99.0925	149.958	108.13
MSMEG_1794	5027.34	0.672388	0.0789515	8.51647	1.64487e-17	2.60405e-16	0.0413046	0.0800409	0.516043	0.605824	0.730995	4148.23	3980.44	4339.8	4386.78	3965.16	4471.54	6910.34	6226.18	6817.56
MSMEG_1795	71.5992	0.718255	0.180776	3.97317	7.09225e-05	0.000254763	0.319711	0.202295	1.58042	0.114012	0.214753	53.7251	53.5393	54.2613	69.7053	62.0809	71.8942	84.6578	106.947	87.5817
MSMEG_1796	111.763	0.231493	0.156314	1.48095	0.13862	0.219295	0.0101734	0.172711	0.0589042	0.953028	0.974022	117.218	111.197	88.5899	118.499	90.1174	104.317	118.989	136.009	120.93
MSMEG_1797	41.8349	0.646504	0.220957	2.92592	0.00343437	0.00881398	0.177449	0.24796	0.715637	0.474216	0.620219	34.1887	25.7401	40.9728	40.6614	32.0417	40.881	55.7883	49.9861	56.2544
MSMEG_1798	82.823	0.0408008	0.209635	0.194627	0.845685	0.893807	0.127753	0.221173	0.577617	0.563523	0.697672	110.706	79.2794	50.9392	80.161	96.1252	85.9911	84.2677	74.3979	83.5395
MSMEG_1799	287.236	-0.519778	0.121003	-4.29559	1.74232e-05	6.96716e-05	0.055386	0.125971	0.439673	0.660174	0.775485	312.582	323.295	306.743	274.174	372.485	343.964	211.84	217.381	222.66
MSMEG_1800	2.69424	0.484717	0.386719	1.25341	0.210056	0.306955	0.578236	0.379154	1.52507	0.127242	0.233699	0	2.05921	1.10737	3.48526	6.00782	2.81938	3.90128	1.16247	3.70538
MSMEG_1801	827.467	-0.0620048	0.140883	-0.440116	0.659853	0.746425	0.366827	0.142374	2.57651	0.00998035	0.0286586	887.278	693.952	704.29	918.948	1159.51	895.153	717.836	826.515	643.725
MSMEG_1802	16484.8	0.224716	0.0862226	2.60623	0.00915445	0.0213128	0.391905	0.0863905	4.53644	5.7212e-06	3.63172e-05	14033.6	13825.5	14677.1	17419.3	20775.1	17822.7	15775.6	17435.9	16598.1
MSMEG_1803	8950.62	0.381152	0.0611065	6.2375	4.44607e-10	3.30438e-09	0.277478	0.0616655	4.49972	6.80416e-06	4.29014e-05	7536.16	7459.47	7896.68	9126.74	9672.6	8993.82	9612.37	10141.4	10116.4
MSMEG_1804	11827.1	0.461683	0.0638046	7.23588	4.62521e-13	4.93306e-12	0.246934	0.0642429	3.84376	0.000121165	0.000597639	9716.1	9714.3	10396	11848.7	11649.2	11938.7	13057.6	14396	13727.1
MSMEG_1805	327.024	-0.54916	0.129445	-4.24242	2.21125e-05	8.70976e-05	-0.874654	0.139192	-6.28377	3.30453e-10	4.05809e-09	517.714	392.279	421.91	226.542	240.313	242.467	302.739	332.466	266.787
MSMEG_1806	2170.04	0.857423	0.108059	7.93477	2.10883e-15	2.76547e-14	0.531866	0.10942	4.86077	1.16928e-06	8.42342e-06	1365.92	1520.72	1665.49	2264.26	2092.73	2278.06	2976.68	2423.75	2942.75
MSMEG_1807	7723.15	-0.252954	0.0774084	-3.26779	0.00108392	0.00310977	-0.565256	0.0781082	-7.23683	4.5928e-13	8.17743e-12	9551.67	9352.91	8787.01	6109.67	6164.03	6364.75	8148.6	7037.58	7992.17
MSMEG_1808	991.226	-0.75937	0.0828802	-9.16227	5.08188e-20	9.93688e-19	-0.757748	0.0872379	-8.68599	3.75468e-18	1.14205e-16	1414.76	1350.84	1337.71	865.507	756.986	778.149	778.696	857.901	780.488
MSMEG_1809	3273.85	-0.926047	0.0840843	-11.0133	3.29615e-28	1.13381e-26	-0.547408	0.0850039	-6.4398	1.1963e-10	1.56051e-09	4591.05	4310.95	4461.61	3006.62	3186.15	2913.83	2185.11	2578.35	2230.98
MSMEG_1810	216.029	-1.43553	0.144485	-9.93549	2.9173e-23	7.23269e-22	-1.30135	0.155962	-8.34399	7.18227e-17	1.89508e-15	416.776	394.338	303.42	161.484	150.196	122.643	132.644	129.034	133.731
MSMEG_1812	685.066	-0.962536	0.114974	-8.37177	5.67609e-17	8.61245e-16	-1.394	0.121775	-11.4473	2.42615e-30	1.99247e-28	1217.77	1087.26	986.67	403.129	418.545	400.352	615.622	480.099	556.144
MSMEG_1813	3590.72	-1.21054	0.126807	-9.5463	1.34411e-21	3.02425e-20	-1.77001	0.128274	-13.7987	2.59472e-43	4.87065e-41	7379.87	6131.28	5433.88	1812.34	1758.29	1793.13	2554.17	3068.91	2384.58
MSMEG_1814	148.773	-1.05596	0.165274	-6.38917	1.66786e-10	1.30918e-09	-0.385656	0.171789	-2.24494	0.0247718	0.062095	227.925	220.335	157.247	142.896	156.203	157.885	106.505	81.3727	88.5923
MSMEG_1815	9.42203	-0.186101	0.38105	-0.488392	0.625272	0.718772	-0.00430538	0.387247	-0.0111179	0.991129	0.995524	11.3962	14.4144	3.32212	3.48526	14.0183	12.6872	5.46179	13.9496	6.06335
MSMEG_1816	19.9351	-0.814168	0.288313	-2.8239	0.00474426	0.0117978	0.07467	0.299799	0.249067	0.803309	0.87743	24.4205	26.7697	18.8254	22.0733	30.0391	23.9647	12.8742	6.97481	13.4741
MSMEG_1817	5275.69	0.140008	0.0483675	2.89466	0.00379564	0.00965068	-0.303635	0.0500341	-6.06855	1.29069e-09	1.44461e-08	5491.35	5367.32	5448.28	4386.78	4457.81	4357.35	5943.99	6008.8	6019.56
MSMEG_1818	149.452	-0.429636	0.141531	-3.03564	0.00240026	0.00641898	-0.36889	0.154459	-2.38827	0.0169277	0.0452278	159.547	194.595	184.931	148.705	136.177	129.691	138.495	110.434	142.489
MSMEG_1821	3976.46	-0.762693	0.0671492	-11.3582	6.75291e-30	2.59454e-28	-0.709657	0.0684602	-10.366	3.54127e-25	2.02828e-23	5711.14	5092.42	5491.47	3214.57	3370.39	3340.96	3161.6	3271.18	3134.41
MSMEG_1822	1598.49	-0.230243	0.0930213	-2.47516	0.0133175	0.0296697	-0.702027	0.0961009	-7.30511	2.77049e-13	5.04214e-12	1875.49	1906.82	2070.79	1286.06	1049.37	1225.02	1730.22	1557.71	1684.94
MSMEG_1823	430.933	-0.889725	0.0921669	-9.65341	4.75476e-22	1.10776e-20	-0.509981	0.0985047	-5.17722	2.25214e-07	1.80887e-06	589.348	574.518	579.157	422.879	384.501	404.581	323.806	283.642	315.968
MSMEG_1824	2362.39	-1.01857	0.065277	-15.6038	6.8565e-55	1.12618e-52	-0.417909	0.0665657	-6.27814	3.42649e-10	4.1844e-09	3036.28	3296.79	3163.77	2335.13	2309.01	2452.86	1524.23	1554.22	1589.27
MSMEG_1826	1305.97	-0.0313734	0.0832732	-0.376752	0.706358	0.786704	0.173913	0.0855032	2.034	0.0419517	0.0962033	1234.05	1249.94	1296.74	1334.86	1521.98	1426.61	1294.44	1142.71	1252.42
MSMEG_1827	183.881	-0.882522	0.134441	-6.56437	5.22531e-11	4.36772e-10	-0.733497	0.146309	-5.01333	5.3495e-07	4.03053e-06	268.625	264.608	252.481	168.454	122.159	166.343	135.765	123.222	153.268
MSMEG_1828	2671.94	0.118126	0.102178	1.15608	0.247649	0.350961	0.188167	0.103139	1.82439	0.0680927	0.142884	2350.88	2561.65	2536.99	2896.25	2883.76	2731.98	2950.93	2297.04	2837.98
MSMEG_1829	662.837	-0.626854	0.0847798	-7.39391	1.42568e-13	1.62054e-12	-0.583715	0.0906108	-6.442	1.17907e-10	1.54313e-09	848.205	829.86	911.369	595.98	522.681	592.07	561.784	541.71	561.87
MSMEG_1831	4027.53	-0.165055	0.0577358	-2.8588	0.00425251	0.0106882	0.0661794	0.058809	1.12533	0.26045	0.400645	4184.04	4152.39	3995.41	4248.54	4411.75	4257.26	3559.53	3774.53	3664.28
MSMEG_1832	365.39	-0.389877	0.10871	-3.58641	0.000335263	0.00107082	-0.727262	0.118909	-6.11611	9.58865e-10	1.08429e-08	477.014	466.41	458.453	293.924	240.313	294.625	388.568	328.978	340.221
MSMEG_1833	1100.81	0.31717	0.107269	2.95678	0.00310872	0.00805057	0.56588	0.109042	5.18955	2.10803e-07	1.69936e-06	870.997	855.6	920.228	1172.21	1413.84	1371.63	1205.5	979.96	1117.34
MSMEG_1835	725.717	-0.0226425	0.12186	-0.185807	0.852596	0.897397	0.331223	0.124064	2.66978	0.00759017	0.0227809	641.445	679.538	691.001	853.889	861.122	834.536	766.602	539.385	663.937
MSMEG_1837	472.186	-0.450718	0.127332	-3.53972	0.000400554	0.00126218	-0.093988	0.130898	-0.718023	0.472743	0.618958	527.483	530.245	534.862	498.393	482.629	507.488	328.098	471.962	368.517
MSMEG_1838	382.955	0.930608	0.103662	8.97735	2.77361e-19	5.22137e-18	0.105247	0.114585	0.918507	0.358354	0.504367	312.582	299.614	252.481	319.482	294.383	310.132	564.515	546.36	547.049
MSMEG_1839	80.1596	-0.126239	0.177398	-0.711612	0.476705	0.586837	-0.350701	0.198021	-1.77103	0.076556	0.157032	87.9138	84.4274	94.1268	63.8965	72.0939	70.4845	67.4922	98.8098	82.1921
MSMEG_1840	8.68541	-0.669518	0.363508	-1.84182	0.0655008	0.117644	0.534491	0.367711	1.45356	0.146068	0.259299	9.7682	7.20722	7.75162	10.4558	14.0183	16.9163	3.51115	3.4874	5.05279
MSMEG_1841	5.74261	0.115012	0.388251	0.296232	0.767053	0.835467	-0.239493	0.392578	-0.610053	0.541827	0.679481	8.14016	6.17762	3.32212	1.16175	6.00782	5.63876	6.24205	11.6247	3.36853
MSMEG_1842	520.112	-0.396469	0.175597	-2.25784	0.0239558	0.0492458	-0.0648172	0.177723	-0.364708	0.715329	0.814412	643.073	523.038	562.546	478.643	718.936	456.739	372.572	524.273	401.192
MSMEG_1844	72.0121	0.446277	0.190537	2.34221	0.0191701	0.0406808	0.601347	0.204332	2.94298	0.00325068	0.010927	53.7251	55.5985	52.0466	81.3228	90.1174	83.1717	72.9539	94.1599	65.0126
[truncated: 4,822 more rows]

## Sheet: yellow
cobD
cydB
cydD
cysT
lgt
MSMEG_0209
MSMEG_0236
MSMEG_0290
MSMEG_0408
MSMEG_0466
MSMEG_0479
MSMEG_0485
MSMEG_0489
MSMEG_0516
MSMEG_0537
MSMEG_0538
MSMEG_0549
MSMEG_0550
MSMEG_0625
MSMEG_0720
MSMEG_0749
MSMEG_0812
MSMEG_0966
MSMEG_0972
MSMEG_1141
MSMEG_1162
MSMEG_1164
MSMEG_1226
MSMEG_1260
MSMEG_1265
MSMEG_1287
MSMEG_1291
MSMEG_1305
MSMEG_1492
MSMEG_1846
MSMEG_1847
MSMEG_1964
MSMEG_1997
MSMEG_1998
MSMEG_2021
MSMEG_2183
MSMEG_2258
MSMEG_2259
MSMEG_2264
MSMEG_2265
MSMEG_2267
MSMEG_2376
MSMEG_2497
MSMEG_2498
MSMEG_2563
MSMEG_2787
MSMEG_2845
MSMEG_2860
MSMEG_2884
MSMEG_2886
MSMEG_2887
MSMEG_2895
MSMEG_2958
MSMEG_2983
MSMEG_3115
MSMEG_3117
MSMEG_3168
MSMEG_3230
MSMEG_3233
MSMEG_3234
MSMEG_3255
MSMEG_3293
MSMEG_3303
MSMEG_3304
MSMEG_3375
MSMEG_3441
MSMEG_3522
MSMEG_3536
MSMEG_3537
MSMEG_3544
MSMEG_3556
MSMEG_3613
MSMEG_3664
MSMEG_3665
MSMEG_3669
MSMEG_3678
MSMEG_3704
MSMEG_3705
MSMEG_3710
MSMEG_3767
MSMEG_3812
MSMEG_3909
MSMEG_3926
MSMEG_3927
MSMEG_3928
MSMEG_3929
MSMEG_3930
MSMEG_3931
MSMEG_3932
MSMEG_3934
MSMEG_3936
MSMEG_3937
MSMEG_3939
MSMEG_3940
MSMEG_3941
MSMEG_3942
MSMEG_3943
MSMEG_3944
MSMEG_3945
MSMEG_3947
MSMEG_3948
MSMEG_3951
MSMEG_3953
MSMEG_3954
MSMEG_3955
MSMEG_3991
MSMEG_3992
MSMEG_3997
MSMEG_3998
MSMEG_4033
MSMEG_4047
MSMEG_4078
MSMEG_4093
MSMEG_4094
MSMEG_4095
MSMEG_4097
MSMEG_4098
MSMEG_4100
MSMEG_4148
MSMEG_4150
MSMEG_4211
MSMEG_4212
MSMEG_4347
MSMEG_4357
MSMEG_4373
MSMEG_4422
MSMEG_4428
MSMEG_4466
MSMEG_4467
MSMEG_4468
MSMEG_4515
MSMEG_4516
MSMEG_4547
MSMEG_4614
MSMEG_4751
MSMEG_4784
MSMEG_4985
MSMEG_5031
MSMEG_5112
MSMEG_5115
MSMEG_5200
MSMEG_5210
MSMEG_5212
MSMEG_5213
MSMEG_5214
MSMEG_5309
MSMEG_5310
MSMEG_5335
MSMEG_5336
MSMEG_5337
MSMEG_5378
MSMEG_5395
MSMEG_5453
MSMEG_5559
MSMEG_5581
MSMEG_5671
MSMEG_5760
MSMEG_5766
MSMEG_5790
MSMEG_5878
MSMEG_5909
MSMEG_5921
MSMEG_5923
MSMEG_5949
MSMEG_5984
MSMEG_5996
MSMEG_6063
MSMEG_6174
MSMEG_6231
MSMEG_6340
MSMEG_6345
MSMEG_6600
MSMEG_6627
MSMEG_6630
MSMEG_6671
MSMEG_6860
MSMEG_6861
MSMEG_6864
nuoL
nuoN
pabB
rnhA
surE

## Sheet: orange
cysA
cysW
fxsA
kdpA
kdpB
MSMEG_0051
MSMEG_0090
MSMEG_0091
MSMEG_0197
MSMEG_0198
MSMEG_0281
MSMEG_0282
MSMEG_0283
MSMEG_0517
MSMEG_0551
MSMEG_0552
MSMEG_0553
MSMEG_0652
MSMEG_0653
MSMEG_0687
MSMEG_0688
MSMEG_0694
MSMEG_0699
MSMEG_0772
MSMEG_0902
MSMEG_0967
MSMEG_1101
MSMEG_1102
MSMEG_1215
MSMEG_1417
MSMEG_1418
MSMEG_1536
MSMEG_1909
MSMEG_2018
MSMEG_2157
MSMEG_2159
MSMEG_2160
MSMEG_2161
MSMEG_2181
MSMEG_2188
MSMEG_2216
MSMEG_2245
MSMEG_2270
MSMEG_2527
MSMEG_2691
MSMEG_2694
MSMEG_2695
MSMEG_2696
MSMEG_2752
MSMEG_2788
MSMEG_2877
MSMEG_2878
MSMEG_2879
MSMEG_2880
MSMEG_2881
MSMEG_3130
MSMEG_3131
MSMEG_3134
MSMEG_3202
MSMEG_3203
MSMEG_3242
MSMEG_3261
MSMEG_3275
MSMEG_3296
MSMEG_3297
MSMEG_3299
MSMEG_3300
MSMEG_3301
MSMEG_3302
MSMEG_3305
MSMEG_3306
MSMEG_3545
MSMEG_3571
MSMEG_3587
MSMEG_3685
MSMEG_3783
MSMEG_3860
MSMEG_3861
MSMEG_3962
MSMEG_3964
MSMEG_3965
MSMEG_3966
MSMEG_3971
MSMEG_4013
MSMEG_4099
MSMEG_4101
MSMEG_4204
MSMEG_4205
MSMEG_4343
MSMEG_4430
MSMEG_4533
MSMEG_5048
MSMEG_5111
MSMEG_5123
MSMEG_5131
MSMEG_5231
MSMEG_5275
MSMEG_5280
MSMEG_5298
MSMEG_5317
MSMEG_5327
MSMEG_5353
MSMEG_5355
MSMEG_5383
MSMEG_5391
MSMEG_5394
MSMEG_5444
MSMEG_5486
MSMEG_5560
MSMEG_5801
MSMEG_5802
MSMEG_5848
MSMEG_5975
MSMEG_6273
MSMEG_6324
MSMEG_6339
MSMEG_6579
MSMEG_6580
xerC

## Sheet: red
MSMEG_0145
MSMEG_0195
MSMEG_0199
MSMEG_0204
MSMEG_0206
MSMEG_0235
MSMEG_0276
MSMEG_0277
MSMEG_0565
MSMEG_0566
MSMEG_0584
MSMEG_0586
MSMEG_0649
MSMEG_0677
MSMEG_0689
MSMEG_0695
MSMEG_0811
MSMEG_0894
MSMEG_1080
MSMEG_1081
MSMEG_1134
MSMEG_1205
MSMEG_1207
MSMEG_1208
MSMEG_1209
MSMEG_1240
MSMEG_1263
MSMEG_1362
MSMEG_1453
MSMEG_1587
MSMEG_1589
MSMEG_1598
MSMEG_1746
MSMEG_1747
MSMEG_1751
MSMEG_1754
MSMEG_1910
MSMEG_1912
MSMEG_1976
MSMEG_2103
MSMEG_2194
MSMEG_2220
MSMEG_2801
MSMEG_2816
MSMEG_2847
MSMEG_3264
MSMEG_3298
MSMEG_3352
MSMEG_3367
MSMEG_3427
MSMEG_3429
MSMEG_3584
MSMEG_3614
MSMEG_3826
MSMEG_4049
MSMEG_4050
MSMEG_4088
MSMEG_4203
MSMEG_4412
MSMEG_4413
MSMEG_4460
MSMEG_4548
MSMEG_4565
MSMEG_4659
MSMEG_4823
MSMEG_4863
MSMEG_5029
MSMEG_5102
MSMEG_5110
MSMEG_5180
MSMEG_5305
MSMEG_5410
MSMEG_5443
MSMEG_5501
MSMEG_5508
MSMEG_5551
MSMEG_5657
MSMEG_5660
MSMEG_5714
MSMEG_5756
MSMEG_5850
MSMEG_5944
MSMEG_5972
MSMEG_5978
MSMEG_6124
MSMEG_6206
MSMEG_6333
MSMEG_6555
MSMEG_6604
MSMEG_6647
MSMEG_6653
MSMEG_6668
MSMEG_6763
MSMEG_6765
MSMEG_6817
MSMEG_6818
MSMEG_6844
recQ

## Sheet: cyan
acpP
ald
hypE
MSMEG_0155
MSMEG_0156
MSMEG_0172
MSMEG_0216
MSMEG_0303
MSMEG_0366
MSMEG_0371
MSMEG_0595
MSMEG_0604
MSMEG_0726
MSMEG_0757
MSMEG_0760
MSMEG_1114
MSMEG_1333
MSMEG_1497
MSMEG_1544
MSMEG_1622
MSMEG_1666
MSMEG_1812
MSMEG_1906
MSMEG_1907
MSMEG_1908
MSMEG_2175
MSMEG_2619
MSMEG_2620
MSMEG_2742
MSMEG_2791
MSMEG_3040
MSMEG_3197
MSMEG_3423
MSMEG_3949
MSMEG_3959
MSMEG_4300
MSMEG_4301
MSMEG_4327
MSMEG_4332
MSMEG_4351
MSMEG_4646
MSMEG_4718
MSMEG_5104
MSMEG_5117
MSMEG_5272
MSMEG_5329
MSMEG_5565
MSMEG_6002
MSMEG_6033
MSMEG_6393
MSMEG_6440
MSMEG_6540
MSMEG_6570
MSMEG_6576
MSMEG_6660
MSMEG_6747
MSMEG_6880
mtrA
nadA
nadB
nadC
orB
pcaH
pruA

## Sheet: green
lys1
maf
mdcH
MSMEG_0083
MSMEG_0084
MSMEG_0085
MSMEG_0086
MSMEG_0089
MSMEG_0365
MSMEG_0575
MSMEG_0576
MSMEG_0580
MSMEG_0582
MSMEG_1530
MSMEG_1543
MSMEG_1665
MSMEG_1810
MSMEG_1813
MSMEG_2007
MSMEG_2080
MSMEG_2081
MSMEG_2082
MSMEG_2087
MSMEG_2381
MSMEG_2382
MSMEG_2647
MSMEG_2690
MSMEG_2697
MSMEG_3163
MSMEG_3164
MSMEG_3193
MSMEG_3277
MSMEG_3404
MSMEG_3422
MSMEG_4325
MSMEG_4370
MSMEG_4596
MSMEG_5285
MSMEG_5435
MSMEG_5681
MSMEG_5682
MSMEG_5846
MSMEG_6179
MSMEG_6452
MSMEG_6454
MSMEG_6636
MSMEG_6637
MSMEG_6758
MSMEG_6761
MSMEG_6781
MSMEG_6801
MSMEG_6802
MSMEG_6803
MSMEG_6804
MSMEG_6925
MSMEG_6926
ptsI
purB
truB

## Sheet: pink
argS
def
dnaE
glmS
glpK
ispD
ispF
leuC
leuD
lysA
mdcB
mdcC
mdcG
MSMEG_0055
MSMEG_0076
MSMEG_0087
MSMEG_0144
MSMEG_0148
MSMEG_0215
MSMEG_0219
MSMEG_0223
MSMEG_0335
MSMEG_0369
MSMEG_0387
MSMEG_0395
MSMEG_0447
MSMEG_0500
MSMEG_0557
MSMEG_0558
MSMEG_0750
MSMEG_0842
MSMEG_0916
MSMEG_0979
MSMEG_1137
MSMEG_1138
MSMEG_1246
MSMEG_1270
MSMEG_1271
MSMEG_1322
MSMEG_1323
MSMEG_1486
MSMEG_1540
MSMEG_1550
MSMEG_1612
MSMEG_1620
MSMEG_1653
MSMEG_1662
MSMEG_1786
MSMEG_1814
MSMEG_1824
MSMEG_1870
MSMEG_1941
MSMEG_1943
MSMEG_1999
MSMEG_2004
MSMEG_2005
MSMEG_2006
MSMEG_2088
MSMEG_2176
MSMEG_2226
MSMEG_2384
MSMEG_2458
MSMEG_2460
MSMEG_2461
MSMEG_2463
MSMEG_2534
MSMEG_2535
MSMEG_2595
MSMEG_2612
MSMEG_2698
MSMEG_2929
MSMEG_2930
MSMEG_3145
MSMEG_3180
MSMEG_3216
MSMEG_3279
MSMEG_3280
MSMEG_3281
MSMEG_3377
MSMEG_3420
MSMEG_3421
MSMEG_3451
MSMEG_3713
MSMEG_3714
MSMEG_3839
MSMEG_3858
MSMEG_4186
MSMEG_4257
MSMEG_4272
MSMEG_4404
MSMEG_4566
MSMEG_4615
MSMEG_4675
MSMEG_4745
MSMEG_4896
MSMEG_4922
MSMEG_4923
MSMEG_4927
MSMEG_5044
MSMEG_5052
MSMEG_5125
MSMEG_5156
MSMEG_5221
MSMEG_5250
MSMEG_5347
MSMEG_5348
MSMEG_5404
MSMEG_5558
MSMEG_5571
MSMEG_5572
MSMEG_5573
MSMEG_5574
MSMEG_5594
MSMEG_5595
MSMEG_5649
MSMEG_5650
MSMEG_5679
MSMEG_5680
MSMEG_5684
MSMEG_5688
MSMEG_5725
MSMEG_5926
MSMEG_5928
MSMEG_5929
MSMEG_6025
MSMEG_6026
MSMEG_6077
MSMEG_6172
MSMEG_6173
MSMEG_6239
MSMEG_6257
MSMEG_6272
MSMEG_6329
MSMEG_6408
MSMEG_6572
MSMEG_6624
MSMEG_6632
MSMEG_6643
MSMEG_6695
MSMEG_6783
MSMEG_6823
MSMEG_6865
MSMEG_6898
MSMEG_6901
pcrA
prfB
purD
rrsB
secA
smc
tgt
uvrB
uvrC
ychF

## Sheet: blue
MSMEG_3198

## Sheet: purple
MSMEG_5575
