# Supplementary material for: Structure and function of the mycobacterial transcription initiation complex with the essential regulator RbpA
Source: eLife. 2017 Jan 9;6:e22520. doi: 10.7554/eLife.22520 (PMC5302886; doi:10.7554/eLife.22520)
Supplement: Supplementary file 8. — DOI: http://dx.doi.org/10.7554/eLife.22520.019 [file elife-22520-supp8.docx]

**Supplementary file 8. Kinetic parameters on the *Mtb* VapB promoter.**

| RNAP | *Mbo* holo | | | | | *Eco* holo |
| --- | --- | --- | --- | --- | --- | --- |
|  |  | +RbpA | +RbpACD-BL-SID | +RbpABL-SID | +RbpAR79A |  |
| *k*1 (M-1s-1) | 1.9 x 107 | 1.5 x 107 | 1.2 x 107 | 1.8 x 107 | 1.2 x 107 | 2.8 x 107 |
| *k*-1 (s-1) | 1.4 | 2.3 | 3.6 | 3.5 | 0.65 | 1.8 |
| K1(M-1) | 1.4 x 107 | 6.5 x 106 | 3.3 x 106 | 5.1 x 106 | 1.9 x 107 | 1.6 x 107 |
| *k*2 (s-1) | 7.7 x 10-3 | 0.18 | 0.20 | 0.40 | 5.0 x 10-3 | 5.3 x 10-3 |
| *k*-2 (s-1) | 6.1 x 10-3 | 0.034 | 0.033 | 0.044 | 0.010 | 3.4 x 10-3 |
| K2 | 1.3 | 5.3 | 6.1 | 9.1 | 0.50 | 1.6 |
| *k*3 (s-1) | 0.035 | 0.010 | 0.017 | 0.016 | 0.022 | 0.026 |
| *k*-3 (s-1) | 9.8 x 10-3 | 2.3 x 10-3 | 3.1 x 10-3 | 4.5 x 10-3 | 9.9 x 10-3 | 4.9 x 10-3 |
| K3 | 3.6 | 4.3 | 5.5 | 3.6 | 2.2 | 5.3 |
| K1K2K3 | 6.1 x 107 | 1.5 x 108 | 1.1 x 108 | 1.7 x 108 | 2.1 x 107 | 1.3 x 108 |
| *k*da | 1.1 x 10-3 | 1.7 x 10-3 | 1.9 x 10-3 | 3.1 x 10-3 | 2.3 x 10-3 | 4.8 x 10-4 |
| t1/2 (min) | 9.8 | 6.8 | 6.0 | 3.8 | 4.9 | 24 |
